# Supplementary material for: Spatial Multi-Omics Identifies Early Synaptic Pruning and Context-Specific Dopaminergic Vulnerability in Synucleinopathies
Source: Research Square preprint supplement (doi:10.21203/rs.3.rs-7852229/v1), 2025-11-06
Supplement: Supplementary file 1 [file 12239dbc29cd2cd1d6331686.xlsx]

## Sheet: Summary
Supplementary information for Fig. 4 proteomics data
Sheet	Description of data
Sheet1	Combined DIA-NN output (report.pg and report.pr)
Sheet2	Statistical comparison of fiber samples (data for Volcano plot Fig 4. e and f. marked)
Sheet3	Statistical comparison of SNpc samples (data for Volcano plot Fig 4. g marked)
Naming Scheme
INT_2-1-B	Intensity (INT) values for sample number 2 (2), which is a sample dissected from fibers (1), cut-out number B
Abreviations:
INT	DIA-NN intensity value extracted from matrix.pg (min 2 peptides per proteingrup)
PRE	Number of identified precursors of the protein groups
PEP	Number of identified peptides of the protein groups
Cluster 1 (1_)	Cluster: Fibers
Cluster 2 (2_)	Cluster: SNpc
CTRL, iLBD, PD, AD, LB	Disease classification
test	Statistical comparison
logFC	Log2 fold change between two groups
AveExpr	Mean of the log2 ratios/intensities across all samples. Since input matrix is log2 ratio values, it is the mean log2 ratios of all samples
P.Value	Limma p-values
adj.P.Val	BH method adjusted Limma p-values
min_psms	PSM/peptide count values
sca.adj.pval	BH method adjusted DEqMS p-values

## Sheet: Sheet1
				Disease	AD	AD	AD	AD	AD	AD	AD	AD+LB	AD+LB	AD+LB	AD+LB	AD+LB	AD+LB	AD+LB	AD+LB	AD+LB	AD+LB	CTRL	CTRL	CTRL	CTRL	CTRL	CTRL	CTRL	CTRL	CTRL	CTRL	CTRL	CTRL	iLBD	iLBD	iLBD	iLBD	iLBD	iLBD	iLBD	iLBD	iLBD	iLBD	iLBD	iLBD	iLBD	iLBD	PD	PD
				Cluster	Fibers	Fibers	Fibers	Fibers	SNpc	SNpc	SNpc	Fibers	Fibers	Fibers	Fibers	Fibers	SNpc	SNpc	SNpc	SNpc	SNpc	Fibers	Fibers	Fibers	Fibers	Fibers	Fibers	SNpc	SNpc	SNpc	SNpc	SNpc	SNpc	Fibers	Fibers	Fibers	Fibers	Fibers	Fibers	Fibers	SNpc	SNpc	SNpc	SNpc	SNpc	SNpc	SNpc	Fibers	Fibers
				Brain sample	3	5	6	10	5	6	10	2	4	7	8	9	2	4	7	8	9	12	13	14	28	29	30	12	13	14	28	29	30	11	15	17	19	21	25	26	11	15	17	19	21	25	26	16	18
Protein.Group	Protein.Ids	Protein.Names	Genes	First.Protein.Description	INT_3-1-B	INT_5-1-B	INT_6-1-B	INT_10-1-B	INT_5-2-B	INT_6-2-B	INT_10-2-B	INT_2-1-B	INT_4-1-B	INT_7-1-A	INT_8-1-B	INT_9-1-B	INT_2-2-B	INT_4-2-A	INT_7-2-A	INT_8-2-B	INT_9-2-A	INT_12-1-B	INT_13-1-B	INT_14-1-B	INT_28-1-B	INT_29-1-B	INT_30-1-B	INT_12-2-B	INT_13-2-A	INT_14-2-B	INT_28-2-B	INT_29-2-B	INT_30-2-A	INT_11-1-B	INT_15-1-B	INT_17-1-B	INT_19-1-B	INT_21-1-B	INT_25-1-B	INT_26-1-C	INT_11-2-B	INT_15-2-B	INT_17-2-B	INT_19-2-B	INT_21-2-B	INT_25-2-A	INT_26-2-B	INT_16-1-B	INT_18-1-B
A0A075B6H7;A0A0C4DH55;P01624	A0A075B6H7;A0A0C4DH90;A0A0C4DH55;P01624	KV315_HUMAN;KV37_HUMAN;KVD07_HUMAN	IGKV3-15;IGKV3-7;IGKV3D-7	Probable non-functional immunoglobulin kappa variable 3-7
A0A075B6K5;P80748	A0A075B6K5;P80748	LV321_HUMAN;LV39_HUMAN	IGLV3-21;IGLV3-9	Immunoglobulin lambda variable 3-9
A0A075B6P5;A0A075B6S2;A0A075B6S6;A0A087WW87;A0A0A0MRZ7;A2NJV5;P01614;P01615;P06310	P01614;A0A075B6S6;P06310;A0A087WW87;A0A075B6P5;P01615;A0A075B6S2;A2NJV5;A0A0A0MRZ7	KV228_HUMAN;KV229_HUMAN;KV230_HUMAN;KV240_HUMAN;KVD26_HUMAN;KVD28_HUMAN;KVD29_HUMAN;KVD30_HUMAN;KVD40_HUMAN	IGKV2-28;IGKV2-29;IGKV2-30;IGKV2-40;IGKV2D-26;IGKV2D-28;IGKV2D-29;IGKV2D-30;IGKV2D-40	Immunoglobulin kappa variable 2-28	39364.9		31501			20568.3	11009.8	17253.2	17931.9			21427.2	9130.95	8781.66	12987.9		18986.3						8334.43	18603.8	13706.5			17089.6		19376.5	29996	22149.8	19079.1			9504.19	14344.7	33422.8	20379.8	16734.6	20486.4		15910.4	32035.5	42322.6
A0A075B6R9;A0A0C4DH68	A0A075B6R9;A0A0C4DH68	KV224_HUMAN;KVD24_HUMAN	IGKV2-24;IGKV2D-24	Probable non-functional immunoglobulin kappa variable 2D-24
A0A075B6S5;A0A0C4DH67;A0A0C4DH69	A0A0C4DH69;A0A0C4DH67;A0A075B6S5	KV108_HUMAN;KV109_HUMAN;KV127_HUMAN	IGKV1-27;IGKV1-8;IGKV1-9	Immunoglobulin kappa variable 1-27
A0A0A0MRZ8;P04433	A0A0A0MRZ8;P04433	KV311_HUMAN;KVD11_HUMAN	IGKV3-11;IGKV3D-11	Immunoglobulin kappa variable 3D-11
A0A0A0MS15	A0A0A0MS15	HV349_HUMAN	IGHV3-49	Immunoglobulin heavy variable 3-49
A0A0B4J2B5	P01766;A0A0B4J1X8;P01782;P01780;P01763;A0A075B7F0;P01762;P0DP04;A0A0B4J1V1;A0A0B4J2B5;A0A0C4DH32;A0AAG2SVT6;A0AAG2SXZ4	A0A0B4J2B5_HUMAN	IGHV3OR16-9	Immunoglobulin heavy variable 3/OR16-9 (non-functional) (Fragment)	11016.2	6383.79	13384.3		6394.67	8886.06		8255.88	13287.8			13625.9		7609.57	7134.59		14384.9	16353.6	7597.16	12800.6		14727.6	7350.73	15712		7259.05		16558.9	9178.52	8394	12909.4	15077.2	11702	11908		9577.89	8566.12	11495.5	15264.8	12710.5	22451.5		21037.8	17777.1	17396.7
A0A0B4J2D5;P0DPI2	P0DPI2;A0A0B4J2D5	GAL3A_HUMAN;GAL3B_HUMAN	GATD3;GATD3B	Putative glutamine amidotransferase-like class 1 domain-containing protein 3B, mitochondrial	30981	33310.4	33124.1	26004.8	53796.7	64461.4	58414.9	39648.2	31146.4	29369.8	38094.6	24882.8	65620.8	46251.9	89948.8	81323.3	46016.1	33696.4	29796.6	30937.7	34060.9	35164.2	30656.2	61215.1	49659.5	48865.2	63369.2	63614.9	59247.7	30999.8	45680.7	77114.1	57384.7	44735.7	42728.5	48171.2	72181.7	62884.1	90847	93275	93635.9	59409	84662.9	42131.2	39362.1
A0A0B4J2D9;P0DP09	A0A0B4J2D9;P0DP09	KV113_HUMAN;KVD13_HUMAN	IGKV1-13;IGKV1D-13	Immunoglobulin kappa variable 1D-13
A0A0C4DH38	A0A0C4DH38	HV551_HUMAN	IGHV5-51	Immunoglobulin heavy variable 5-51	16278.2		20216.2			9142.22	11653					13334.8	11072.9		10379.8			18075.4	11267	22728.4		14168.6	8075.73	25307.4	8180.51	12796.3					20713.1	15478.5		14885.8			11195	23579.9	12068	17831.9	25308.7		16085.7
A0A0C4DH41;P01824;P01825;P06331;P0DP06;P0DP08	P0DP06;P01824;P0DP08;P01825;A0A0C4DH41;A0A0J9YWU9;P06331	HV434_HUMAN;HV439_HUMAN;HV459_HUMAN;HV461_HUMAN;HVD34_HUMAN;HVD82_HUMAN	IGHV4-30-4;IGHV4-34;IGHV4-38-2;IGHV4-39;IGHV4-59;IGHV4-61	Immunoglobulin heavy variable 4-61
A0A0C4DH72;A0A0C4DH73;P01597;P01611;P04432	P04432;A0A0C4DH73;P01597;A0A0C4DH72;P01611	KV106_HUMAN;KV112_HUMAN;KV139_HUMAN;KVD12_HUMAN;KVD39_HUMAN	IGKV1-12;IGKV1-39;IGKV1-6;IGKV1D-12;IGKV1D-39	Immunoglobulin kappa variable 1-6
A0A0J9YX94	A0A0J9YX94	PMA6F_HUMAN	PNMA6F	Paraneoplastic antigen Ma6F					3118.81	7958.64							5656.64	4314.94	5455.81		6723.29			5961.89				5933.84	5456.82		5671.41	5650.27	8566.51			14352.1					2681.19		3826.84	4330.46			4346.49
A0A0J9YY99	A0A0J9YY99	A0A0J9YY99_HUMAN		Ig-like domain-containing protein (Fragment)
A0A0U1RQS6	A0A0U1RQS6	TM275_HUMAN	TMEM275	Transmembrane protein 275							4263.81																									35336.6
A0A7I2V3R4	A0A7I2V3R4	RN228_HUMAN	RNF228	RING finger protein 228
A0AVF1	A0AVF1	IFT56_HUMAN	IFT56	Intraflagellar transport protein 56
A0AVT1	A0AVT1	UBA6_HUMAN	UBA6	Ubiquitin-like modifier-activating enzyme 6	36053.6	34930.6	42245.5	40320.9	32227.2	25586.6	25951.1	42004	38194.4	42950.4	40506.5	34808.7	29107.7	26884.1	26185.9	41518.5	29210	41747.6	40417.4	34958.5	41764.5	36350.2	41282	26848.4	27758.5	29524.4	26333.4	25127.4	24705.9	33123.4	35131	33031.8	45150.1	43096.2	42303.7	47435.6	26565	21410.6	26611.5	26027	30453.1	39954.7	31023.7	38020.8	45145.9
A0FGR8	A0FGR8	ESYT2_HUMAN	ESYT2	Extended synaptotagmin-2	33255.5	31569.1	30618.2	35405	27614.3	25451	26593	34709.7	32129	56644.5	30690.4	31855	30354.4	31630.8	27005.5	43378.8	33040.8	31614.2	28281.2	37649.1	30658.6	30556.5	30778.6	33800.2	30827.1	34193.1	29977.8	32132.5	31840.6	32100.9	31063.9	42835.6	36192.8	28120	34290.7	29088.4	32055.1	28096.3	33708.1	33865.8	28689.6	42704.5	34987.6	37511.8	33966.7
A0JNW5	A0JNW5	BLT3B_HUMAN	BLTP3B	Bridge-like lipid transfer protein family member 3B					4158.81	3882.21	2949.65		3810.16					3200.12	2623.06		3094.26							3784.17	2387.92		4786.87	4070.43	2906.36										2313.86	3945.19	4662.27		3513.37
A0MZ66	A0MZ66	SHOT1_HUMAN	SHTN1	Shootin-1	42487.1	45567.9	44699.6	44760	28710.5	23432.2	22954	51680	42952.5	104247	45586.5	38128	22606.8	24698.2	27084.1	82577.8	25946.4	51124.9	40675.7	37577.9	43337.1	44938.2	41676.2	24840.4	23734.2	27801.7	26601.8	23853.6	23506.8	42995	43801.5	33901.6	52806.2	49332.9	56766.7	48595.9	22138.1	25870.6	21924.3	26698.5	25337.3	31977.1	25791.5	34588.9	44614.4
A1A5C7	A1A5C7	S22AN_HUMAN	SLC22A23	Solute carrier family 22 member 23																											18044.9
A1IGU5	A1IGU5	ARH37_HUMAN	ARHGEF37	Rho guanine nucleotide exchange factor 37	16172.9	17987.4	16390.5	16453.9	9789.08	10562.2	11012.7	13461.4	19588	12565.6	12404.5	17123.8	10624.5	8453.48	9085.85	8814.58	11134.2	14857.1	10437.6	12576.2	11550.1	17979.9	15691.2	10174.6	8269.26	11993.4	11178	12255.2	10742	12004.7	10602.4	8960.58	15327.7	18757.3	17154.4	11326	8289.16	7488.67	9086.41	11294.6	10935.2	12650.9	9120.23	11512.8	14604.2
A1L0T0	A1L0T0	HACL2_HUMAN	ILVBL	2-hydroxyacyl-CoA lyase 2	12991.8	12517.9	13818.2	13315.2	13728.4	14232	14685	10638.9	13512.1	24650.1	12978.6	13717.4	14220.9	11999.7	10434.7	26181	14642.8	10253.8	15333.3	14251.7	15319.9	12311.1	13090.1	11936.8	13885.1	11355	12968.2	12905.6	14973.9	12085.3	13923.3	12065.1	12934.9	11279	16487	10521.7	12850.7	12713.4	12798.7	13632	14111.6	19504.5	12892.1	14977.1	13532.4
A1L390	A1L390	PKHG3_HUMAN	PLEKHG3	Pleckstrin homology domain-containing family G member 3		6036.1	3577.3					4410.72	5427.38	6917.13											4540.53	5956.48								4649.26					5299.47					2318.21
A1X283	A1X283	SPD2B_HUMAN	SH3PXD2B	SH3 and PX domain-containing protein 2B	9347.39	4047.73	4189.42	4642.63			4139.36	4791.97	7688.03		5200.33	6585.91		2794.57			2651.63	5842.57	5154.25	3423.7	2894.17	4933.34		2986.51	5213.95				3323.16	5475.28	8210.13	3676.03	6460.58	5474.52	5761.34	4244.81		5050.98						3470.85	5452.63
A1Z1Q3	A1Z1Q3	MACD2_HUMAN	MACROD2	ADP-ribose glycohydrolase MACROD2	2938.82				10774	15659.8	9810.85	5412.74	6223.74	20901.5	6304.47		13124.6	17242.8	18843.9	41045.8	17820.9			4394.62	6702.89		4192.22	9612.39	17445.5	12242.1	13521.9	16091.6	13695.1	6862.17		4821.95		5643.51		5569.61	14753.6		15387.5	13639	12965.6	15929.7	17612.7
A2A3K4	A2A3K4	PTPC1_HUMAN	PTPDC1	Protein tyrosine phosphatase domain-containing protein 1																						2909.65									2584.4		2628.48	4396.17		2647.83
A2RRP1	A2RRP1	NBAS_HUMAN	NBAS	NBAS subunit of NRZ tethering complex	15082.3	15326	14274.7	16077.9	17403	19412.6	20019.4	12810.5	15587.1	19930.5	13459.2	15479.1	17757.8	16628.5	15300.2	35116.1	15484.4	12254.4	12179.2	15595	12366.1	13701.6	11326	23794.1	15205.2	17402.8	19209.4	19993.3	19128.1	11621.4	13493.1	15888.7	16786.5	14601.3	14216.3	12889.2	14642.3	16439.7	18275.6	19128.5	20512.1	27462.3	17896.6	14742.9	14307.4
A2RTX5	A2RTX5	SYTC2_HUMAN	TARS3	Threonine--tRNA ligase 2, cytoplasmic	43953.4	37609.7	38144.6	36859.4	33758.3	28635.9	27935.5	39288.1	35506.7	48509.9	37044.5	33388.5	28452.6	28598.7	37122.7	49394.3	24296.4	37568.7	35107	37985.6	32847.6	29587.3	33368.2	28379.8	28959.4	27717.9	24181.1	28251.9	30578.6	41954.1	37853.2	28034.4	36368.5	29072.1	40736.5	31003.9	29476.4	47118.8	25808	27204.9	25939.7	84038.7	27248.5	30048.8	32725
A2RUC4	A2RUC4	TYW5_HUMAN	TYW5	tRNA wybutosine-synthesizing protein 5	12486.4	13868.2	10298.9	12282	10860.5	6209.25		12237.3	11152.3			11436.8	9634.41					13874.7	11702.3	12425.5	10739.3	11323.5		8210.65		10499.6	8629.04		7049.33	12178.7	13927.6	7648.68	9785.21	10595	12933.8	10567.3	6533.03			8719.08	7478.44			12295.5	9320.39
A3KMH1	A3KMH1	VWA8_HUMAN	VWA8	von Willebrand factor A domain-containing protein 8	17328.4	16096.1	21030	11883.4	31725.5	33112.5	17711.6	20323.6	16028.9	21865.2	17414.3	13604.2	34317.1	23272.6	28510.3	46974.4	24496.3	13930.9	18456	31467.8	11023.5	15817	10911.1	29083.4	24009.6	36775.6	19155.1	22490.2	26857.3	15441.5	18084.7	19500.9	20828.5	17215.2	15665.1	15843.4	27987.2	32737.5	19559.1	38305	33712.3	22990.9	28032.2	21758.6	20093
A4D126	A4D126	ISPD_HUMAN	CRPPA	D-ribitol-5-phosphate cytidylyltransferase		5802.17	6474.68		6645.24	3960.46			6736.27		6996.39	5465.77	6260.8	7653.68	3895.79		6748.09				7962.42	5865.26	6991.62	4635.11	5984.77	5755.62	4684.59	4846.24	5036.52	7032.56		4136.72	5334		5018.36	4408.83	4639.13		3788.93	4673.51	5150.76		5025.03	5770.51	4848.16
A4D161	A4D161	F221A_HUMAN	FAM221A	Protein FAM221A		4571.37		4728.35			3129.85	3644.01						2223.17										2527.69				3407.61		2916.28	5036.53		4099.9	6175.96										4545.82
A4D1E9	A4D1E9	GTPBA_HUMAN	GTPBP10	GTP-binding protein 10							5546.41						4815.37	4030.85		7807.14								6948.28	4853.15	4499.49	4154.55	5909.58	3851.19			5200.15	3129.82				7041.29	7693.5		7937.89	5667.06			5230.31
A4D1P6	A4D1P6	WDR91_HUMAN	WDR91	WD repeat-containing protein 91	31136.1	33694.2	31354.4	33663.4	23240	28834.9	32483.3	30112.2	32309.7	25392.8	25942.6	33694.7	31585	27058	25463.5	25205	30583.1	29811.4	22468.7	32655.8	20872.4	44112	22817.6	32354.1	25149.9	28320.4	24053.5	31059.1	24415.9	30995.1	33258.2	28496.2	32271.1	29238.8	31510.3	26074.9	26375.4	30947.4	22713.4	26235.7	26390.9	25932.7	24710.3	25109.2	23845.1
A4D1U4	A4D1U4	DEN11_HUMAN	DENND11	DENN domain-containing protein 11	11596.6	11068.8	12018.2	12717.4	8566.9	10448.1	9472.59	9789.94	12647.4	10134	11602.7	13110.9	9487.9	10820	10056.4	13369.2	10302.8	12620.8	14439.6	10951.4	14826.1	16028.5	16420.9	10172.1	11899.4	12451.7	13805	13761.6	9775.66	12608.3	14762	10423.1	15734.1	11501.2	13053.5	14179.4	12450.7	8623.25	17502.9	11031.5	10347.2	11789.8	12532.4	10179.7	13229.5
A4D2B0	A4D2B0	MBLC1_HUMAN	MBLAC1	Metallo-beta-lactamase domain-containing protein 1	8807.96	9398.7	7169	8488.08	9592.37	8194.46	7188.6	10760.6	8490.71			7434.13	9890.98	6453.62	8802.83		11264.7	10921.3	7266.88	8746.68	6596.64		5833.6	9167.14	8562.86	8045.61	11067.1	9241.12	9271.2	11103.4	8474.11	7746.63	10008.1	6896.29	9027.75	5760.5	9087.44	6872.8	9057.4	10419.1	9150.98		6256.86		7666.18
A5D8V6	A5D8V6	VP37C_HUMAN	VPS37C	Vacuolar protein sorting-associated protein 37C	15646.2	13617.5	16529.6	15364.5	13100.4	9549.29	8314.19	19871.9	13434.7	26591.8			9658.73	9337.93	7383.32	24164.3	8255.96	14156.8	15467.1	10055.7	13649.1	13435.8	12955.2	8778.89	7711.35	10404.8	8604.72	7517.08	9390.12	11907.1	12493.4	8334.61	10385.1	13734.8	14540.2	14419.7	5923.57	8304.24	8835.4	7242.77	8926.96	15890.3	6909.48	10219.1	10897
A5YKK6	A5YKK6	CNOT1_HUMAN	CNOT1	CCR4-NOT transcription complex subunit 1	13282.4	11501.9	12629.1	13103.8	13730.8	11869.7	12496	14267.1	13371.8	22991.1	10940.3	13260.5	13547.1	14302.6	10028.3	33979.5	14272.6	13023.1	11757.8	14753.3	12023.7	12836.1	11694.7	13291.7	15045.4	13439.5	12711.4	12860.4	14685.4	13648.5	13076.2	14482.8	15558.5	13678.7	13222.7	11808.1	14381.2	18413	12910.3	13102.6	13205.3	14723.6	13395.2	13319	13238.1
A5YM72	A5YM72	CRNS1_HUMAN	CARNS1	Carnosine synthase 1	148436	139941	143034	135416	41926.3	21381.4	31047.6	116051	164083	161112	130535	126260	19587.1	29588.5	22659.7	63717.6	13563.2	110092	199018	68701.9	139940	187240	137454	16385.4	41746.6	34262.5	21076.4	29556.1	23026	157604	160970	29541.9	156530	146949	231044	128004	20802.6	53279.9	24331.1	23223.9	21891	63283	23516.3	74399.1	120779
A6NCE7;Q9GZQ8	Q9GZQ8;A6NCE7	MLP3B_HUMAN;MP3B2_HUMAN	MAP1LC3B;MAP1LC3B2	Microtubule-associated proteins 1A/1B light chain 3 beta 2	196901	239228	248383			169858		175874	249127			162991	106628		135644			160924		126982								199305		190504	192185		203204	216800		163618		173928			125393		130174		170251
A6NCS6	A6NCS6	CB072_HUMAN	C2orf72	Uncharacterized protein C2orf72					5831.27	10289.9	8166.36				5827.28		15595.1	9726.54	11071.6		10122.1	5593.52		5789.76	4238.72		3604.47	4878.15	7038.36		7591.06	9260.13	9266.96			10880.2	3781.81				11428.5	6898.94	9292.58	8074.02	11496.5		7877.11		5052.63
A6NCW0;Q7RTZ2	C9JJH3;A8MUK1;C9JVI0;Q0WX57;D6RCP7;D6RBQ6;D6RJB6;C9J2P7;D6R901;C9JLJ4;Q7RTZ2;C9JPN9;D6R9N7;A6NCW0;D6RA61	U17L1_HUMAN;U17L3_HUMAN	USP17L1;USP17L3	Ubiquitin carboxyl-terminal hydrolase 17-like protein 3
A6NDB9	A6NDB9	PALM3_HUMAN	PALM3	Paralemmin-3								8672.27																					5968.49			7575					5199.62	10356.2
A6NDG6	A6NDG6	PGP_HUMAN	PGP	Glycerol-3-phosphate phosphatase	57939	52720.5	70960.2	58592.3	53457.6	21677.6	20567.8	70674.3	58856.7	51084.9	85989.8	45871.8	65765.9	62915.3	39992.9		64302	70822.7	82826.8	46206.8	102185	42804.3	96991.4	29776.3	61091.9	51560	39388.2	41735.2	49095.9	62187.7	63505.2	54290.5	61009.7	65898.4	67017	77644.5	51032.4		62019.5	42510.4	42913.7		36590.2	77473.3	84050.7
A6NDU8	A6NDU8	RIMC1_HUMAN	RIMOC1	RAB7A-interacting MON1-CCZ1 complex subunit 1
A6NE02	A6NE02	BTBDH_HUMAN	BTBD17	BTB/POZ domain-containing protein 17					5452.66	11663.3	16010						9755.32	10638.3	14103.5	12975.6	5786.42			14208.2				16177.9	6333.41		11183.3	15831.8	9990.17			16060.7					12021.6	11168.9	15337.9	8167	11828.7	22312.4	10400.2	11121.2
A6NFN3	O43251;Q9NWB1;A6NFN3	RFOX3_HUMAN	RBFOX3	RNA binding protein fox-1 homolog 3															7883.87									6008.1			5541.67		5335.25			7031.29					3747.99	15935.2	7034.49				5956.16
A6NGB9	A6NGB9	WIPF3_HUMAN	WIPF3	WAS/WASL-interacting protein family member 3	4497.37	4281.86	5285.81		14210.5	12160	6691.68	10198.9	4837.66				13545.6	12885	12593.5		14508.5	9265.08	10538.6			5280.76		9675.91	15891.2	13389.9	12149.4	12068.2	13576.6	8022.79		3711.27	6064.03	6373.72			10297.4		16441.6	11995.2	7932.41		11815.1	8810.26	6597.57
A6NGN9	A6NGN9	IGLO5_HUMAN	IGLON5	IgLON family member 5	12258.1	10147.8	11533.8	12540.7	18354.1	20264.4	21141.4	11910.8	10562.4	21632	10859.4	11268	17765.6	17911.9	17813.9	26509.2	21433.2	12139	13528.2	37614.6	10712.8	10723.5	14032.4	22619.8	21321.4	18658.1	22792.4	23163.1	26065.1	11639.8	11629.8	66508.4	12347.2	10809.2	10759.5	11342	23619.4	19187.7	22354.4	21018	16911		21556.3	29709.8	14312.7
A6NHL2	A6NHL2	TBAL3_HUMAN	TUBAL3	Tubulin alpha chain-like 3	150417	179985	113165	393137		87385.8	207491	173388	211346		99198.5	187751	105055	168262	80477.9		154042	58649.3	142853	180768		188476		103920	237443	106399	169220			191146	175376	184729	156309	167027	121397		115774	112885	120569	99914.5	103154	314730	125473	173270	205957
A6NHQ2	A6NHQ2	FBLL1_HUMAN	FBLL1	rRNA/tRNA 2'-O-methyltransferase fibrillarin-like protein 1		6743.3	5227.92		9728.49	11876.3	10504.9						10018.2	6963.54	13366.6		3785.91							9574.07	6212.8	8207.68	8883.45	13246.7	8827.65			19694.6		4840.69			9037.02	23556.3	11719	12112	7474.41		11391.5		4317.38
A6NHR9	A6NHR9	SMHD1_HUMAN	SMCHD1	Structural maintenance of chromosomes flexible hinge domain-containing protein 1				7136.9		5367.6		8162.09					5803.68	10724.1	6209.35			6783.85	15692.4		22601				15241.1	8872.15	5356.25			6914.17		7134.88				4711.22	5339.61		7585.04	4067.87		12998.3	5653.5	7397.95
A6NHX0	A6NHX0;Q8WTX7	CAST2_HUMAN	CASTOR2	Cytosolic arginine sensor for mTORC1 subunit 2	5514.94	7848.09	6229.86			5747.93	8411.68	3166.05	6191.05	16090.6	4043.51	4504.43	5994.47	3809.98	6108.8	11033	4534.04	5129.2	3769.83	3393.09	5400.37	6739.66	4350.4	7123.98	4720.89	3417.63	9858.61	9708.38	6363.63	8747.01	6872.29	7909.33	9006.08	7839.84	9545.32	6804.94	4734.32	7522.66	6857.51	6353.76	4431.77	11952.4	5722.77	5637.1	8575.48
A6NIH7	A6NIH7;Q13432	U119B_HUMAN	UNC119B	Protein unc-119 homolog B	37334.2	43953	40206.7	40867.1	36515.6	31528.9	31563.2	41490	45633.7		24405.7	43213.5	36513.9	36429.4			30663.3	32011.6	31124.4	40738.3	25219.4	30735.8	27728.5	32334.5	33807.9	37008.1	28533.9	32701.2	42289	37205.4	32998.3	47147	27229.2	30956.4	30577.1	27572.9	35906	45250.8	25645.8	31908.4	37586.4		25271.8	29991.6	32915.4
A6NKG5	A6NKG5	RTL1_HUMAN	RTL1	Retrotransposon-like protein 1					7222.09	12725.8	12785.6						13384.7	13173.3	12036	21586.3	8806.78							16288.7	10578.6	13607.8	10992.7	12704.6	14162.6			11920					9062.34		14223.6	14855.9	13985.4		14672.8
A6NKN8	A6NKN8	PC4L1_HUMAN	PCP4L1	Purkinje cell protein 4-like protein 1	56063.8	49009.4	50126.2	49309.3	51723	68360	63137.6	63644.1	44181.5	113323	50251.3	77767	64696.1	63619.9	50308.3	176091	76129.6	67442.6	55652.1		45118.5		29861.5	92361	50727.6	63524.7	58096.7	48123.9	45635.9	41934.3	35508	19662.3	54048.1	39887	29940.5	46542	59092.8	54252.3	76419.8	50701.3	41458.7		64991.3	25961.2	31633.3
A6QL63	A6QL63	ABTB3_HUMAN	ABTB3	Ankyrin repeat and BTB/POZ domain-containing protein 3					11896.4	13282.2	10183.7							5859.53	10464	17153.5				14474.5				12518		7831.76	7683.49	7079.72	9160.31		9610.34	10215.3						20023.8	7649.56	8528.08	8270.7		6767.29	12827.7
A6XGL0	A6XGL0	YJEN3_HUMAN	YJEFN3	YjeF N-terminal domain-containing protein 3					12007.4	12490.9	6436.85						9347.98	11024.5	15813.8		9560.78			5098.05			3558.81	6291.41	8704.47	7734.42	12082.3	9548.8	8184.07			7221.91		3491.79			11862.9		12429.5	7292.05	6299.73		7646.53
A7KAX9	O14559;Q7Z6I6;A7KAX9	RHG32_HUMAN	ARHGAP32	Rho GTPase-activating protein 32						9826.93									7363.98		7550.01	3626.2						8646.98	7109.98	7267.24		8941.56				5998.85					5807.07	7376.53	7418.94	7241.26	8164.2		9414.94	6199.8
A8K2U0	A8K2U0	A2ML1_HUMAN	A2ML1	Alpha-2-macroglobulin-like protein 1		5050.42		18450.5	5284.3		7860.26		7878.74		22929.5	16356.6			5029.24			15347.8	17935.6	17935.1						12915.7		15412.6		14281.2	21379.9	5270.1	17509.6	9706.43	6255.52		18774.3			9202.87		15541.1	6739.32		21163.1
A8MSI8	A8MSI8	LYRM9_HUMAN	LYRM9	LYR motif-containing protein 9
A8MU93	A8MU93	CQ100_HUMAN	C17orf100	Uncharacterized protein C17orf100
A8MVW0	A8MVW0	F1712_HUMAN	FAM171A2	Protein FAM171A2					7190.01	10762.6	10322.7						10172.8	11417.1	8952.94	12581.1	10425.5							7278.94	11179.6	8780.81	10110	11534.5	11869			9211.17					9621.53	7424	12230.6	9161.9	9116.55		10831.3
A8MWD9;P62308	A8MWD9;P62308	RUXGL_HUMAN;RUXG_HUMAN	SNRPG;SNRPGP15	Putative small nuclear ribonucleoprotein G-like protein 15		15516			13143.2	8742.47	8282.75	12907	14443	10213.6		8996.8	11412.6	8591.05	8279.66	14074.4	7517.85	19059.5	11183.3	15691.5	11213.9	9117.08	11657.4	11353.8	7106.13	7891.43		6961.12	6532.21		14290.6	11561.7	11557.7		11303.6		10986.7	14259.3	7993.52	7174.92	9083.89		6416.13	10137	11181.1
A8MXV4	A8MXV4	NUD19_HUMAN	NUDT19	Acyl-coenzyme A diphosphatase NUDT19		17083.6			9470.54	25191.7	25214.5		20567.1	26294.9	15703.6		22583.7	24565.3	27744.2	22167.4	13473.2	19926		13075.1				38943.6	14212.7	18333.9	34245.8	36686.5	17129			20351.5			22250.2		29051	40538.6	22347.3	20731.8	30834.8	41460.1	28363.3	15558.5
B2RXF0	B2RXF0	T229A_HUMAN	TMEM229A	Transmembrane protein 229A
B7ZAQ6;P0CG08	P0CG08;B7ZAQ6	GPHRA_HUMAN;GPHRB_HUMAN	GPR89A;GPR89B	Golgi pH regulator A	3289.57					4971.33	5386.54						4556.59	5234.87	5000.88									5450.68		7020.18	4595.76	5632.24	6306.74			5821.52				3926.47	6089.1	5788.24	5448	5039.1	5160.37		5107.9
B9A064	B9A064	IGLL5_HUMAN	IGLL5	Immunoglobulin lambda-like polypeptide 5					1923.61																																		13717.7					12892.5
C4AMC7;Q6VEQ5	C4AMC7;Q6VEQ5;A8K0Z3;A8MWX3	WASH2_HUMAN;WASH3_HUMAN	WASH2P;WASH3P	Putative WAS protein family homolog 3	8612.34				9668.49			9886.5	10335.2		12699.3		9132.6	9039.47	13765.2		5612.7	9451.04	12419.9		9372.39		6178.95		6216.24	3961.1		4023.58	10447	7167.39	8357.88	6742.35		10564.9	10369.2	10182	7312.24		7352.13	4646.23			5574.28	7015.17	13082
C9J069	C9J069	AJM1_HUMAN	AJM1	Apical junction component 1 homolog	4909.8	5080.26	5876.7	4621.23	4622.59	7905.41	5116.93		3944.82	8050.65	3602.86	4055.75	6243.1	3975.23	4927.8	19596.8	3842.1	3227.9	3499.07	5031.78				8504.38	4275.15	6974.16	4541.17	5855.31	4914.13		3804.48	5398.73		2758.23			4749.45	6147.32	5538.35	5953.09	5337.54	8018.75	5235.18	6376.92	4030.86
C9J798;O43374	C9J798;O43374	RAS4B_HUMAN;RASL2_HUMAN	RASA4;RASA4B	Ras GTPase-activating protein 4B		3326.71			5783.37	3942.31	4156.25	2847.38					3728.54	2147.93	2655.78		3878.28		2609.64	4843.81				2935.25	4676.24	5604.77	4732.89	2556.46	2731.04			5904.46		2448.64	4490.86		3811.59	5456.97	3294.18	3105.82	3702.71		2730.36	3283.29
C9JBD0	C9JBD0	KRBX1_HUMAN	KRBOX1	KRAB domain-containing protein 1
C9JLW8	C9JLW8	MCRI1_HUMAN	MCRIP1	Mapk-regulated corepressor-interacting protein 1	8435.17	7359.01	7210.41	5426.24	4699.31		6446.98	5801.44	6650.01	8247.83		7036.82	3982	3914.18	5568.23		4650.38	5332.58	5257.27	4905.65		10286.4		5456.47	5289.4	2809.71	5309.1	7219.19	4953.94	6748.36		4883.74	5110.56	5743.11	8515.09	5102.4		6556.21	3780.82	3942.37			4322.94	4017.06	5436.67
C9JTQ0	C9JTQ0	ANR63_HUMAN	ANKRD63	Ankyrin repeat domain-containing protein 63					35231.4	44105	34570.7			15308.1			43697.1	38110.6	41334.2	38520.4	43445.5	12077.7						32213.6	48123.5	36106.1	40695.3	47116.6	49694.3								32871.7		51289.7	32795.4	28435.6	25694.4	36225.5
E9PAV3	E9PAV3	NACAM_HUMAN	NACA	Nascent polypeptide-associated complex subunit alpha, muscle-specific form	20333.6	14093.7	18126.8	16762.4	20540.5	22339.4	17216.6	14461.9	19462.6	27974.3	11626.1	17876.6	14940.1	16067.3	25170.7	54446.5	12073.9	15260.6	10924.7	15683.8	13363.4	20158.5	15340.1	26707.4	12504.5	10404.9	22660.4	25183	22609.1	13253.3	14928.5	22235.1	17940.3	20422.9	18853	16192.6	9518.9	22531	21354.1	16165.4	11644.8	30566.9	22123.8	17204.6	16930.1
H3BS89	H3BS89	T178B_HUMAN	TMEM178B	Transmembrane protein 178B							9794.12						14422.4		8300.41	14892.5											10758.1											3327.27	13895.3		12411.1
O00115	O00115	DNS2A_HUMAN	DNASE2	Deoxyribonuclease-2-alpha					33122.2	16939	9558.36								27291.6		21254.2							21750.8	29737.6			20378.8	24848.9	27523.6		16031.6	20224	16503			32450.8	15768.9	19810.2	29745.8	23161.4		22379.4
O00116	O00116	ADAS_HUMAN	AGPS	Alkyldihydroxyacetonephosphate synthase, peroxisomal	15302.6	13660.6	12686	16128.4	10304.3	11159	10807.3	11969.2	13257.9	16077	11723.2	10581.2	10053.2	10322.9	11904.1	21367	9398.01	13668	15152.4	13048.3	15682.7	12674.9	11335.5	14271.3	12950.5	11249.1	10895.2	11401.6	10238.8	16287.1	13160	9330.69	15536.1	15043.4	18451.6	13792.2	14114.9	9335.72	10062.8	12908.3	12918.9	15292.7	12668.8	11082.3	12318.1
O00139	O00139	KIF2A_HUMAN	KIF2A	Kinesin-like protein KIF2A	84988.4	80815.1	77194.9	68951	71438.6	95683.4	84889.3	74433.5	86015.4	72469.7	73549.9	67393.5	81517.7	91251.3	78750.3	144548	98274.1	76623.3	70182	82469.3	59604.7	68328	55902.1	88493.7	79914.9	81114.3	83332.5	79893.1	87747.7	70586.2	77802.6	88437.7	73991	76210.1	74549.1	61662.9	88989.8	69772.9	87739.3	90603.4	85432.7	82189.7	75913.3	73985	72637.2
O00142	O00142	KITM_HUMAN	TK2	Thymidine kinase 2, mitochondrial	43140.1	43658.1	44684.5	35085.5	40103.6	52317.1	58207.5	45678.6	41818.2	90689.2	54376.7	34764.9	53492.1	58852.5	58252.8	140043	55562.7	44983.1	42468.9	67260.1	46338.5	50417.5	39818.8	65094.9	59925.6	60619.5	68646.8	74298.8	68337.8	45518.3	51993.6	71997.8	54526.1	44788.8	58333	54941.8	71593.8	80306.6	71492.3	75692.6	84407.6	121236	71261.1	64373.2	51224.5
O00148	O00148	DX39A_HUMAN	DDX39A	ATP-dependent RNA helicase DDX39A
O00151	O00151	PDLI1_HUMAN	PDLIM1	PDZ and LIM domain protein 1	7324.89		13973.2		7794.24		7023.1	8108.42	11471.6	6972.54		9527.59		3926.97			7214.02	4040.41											3652.28	7394.01	11077.9						8432.85	12992.4					6084.66		5363.64
O00154	O00154	BACH_HUMAN	ACOT7	Cytosolic acyl coenzyme A thioester hydrolase	244165	284491	267124	248859	183120	270367	228663	231648	273156	415006	243397	242836	201058	217200	233803	332002	213922	203725	238914	239296	299310	288807	290043	205308	205227	180246	272652	237135	222169	289191	296683	253012	271688	313909	271918	300633	218778	265041	237496	251576	205009	335873	248762	226219	259999
O00159	O00159	MYO1C_HUMAN	MYO1C	Unconventional myosin-Ic	17853.8	17741.7	18729.1	16900	25531.3	15374.8	17087.3	15143.9	17709.5	21541.6	14863.4	15587.9	17585.8	16055	17023.8	24781.3	22109	18232.2	18596.7	20053.8	15294.9	20399.4	16430	19638.7	20187.5	20223.7	16635.3	14235.3	19027.9	17016.1	18456.8	20629.9	18148.4	16081.6	15372.2	14717.8	20540.4	27636.6	16409.1	18336.3	18168.2	25301	13614.6	24551.4	15197.1
O00160	O00160	MYO1F_HUMAN	MYO1F	Unconventional myosin-If	10558.9	10366	11500.6	9009.77		9823.82	9718.39	10262.9	7516.6	10492.6	7689.02	8708.74	11846.6	8436.94	7977.77		7956.17	10401.2	11413.7	9407.13		10936.6	9887.85	9670.65	6582.9	8045.99	7554.64	8046.11	10101.6	13126.8	11707.6	12660.6	13797.8	10940.3	11080.9	9651.25	7901.82	12343.6	8404.58	13039.2	13573.9		7722.43	6822.82	11140.3
O00161	O00161	SNP23_HUMAN	SNAP23	Synaptosomal-associated protein 23	24602	26775.6	32200.2	24156.8	18661.5	15735.5	13955.6	32268.6	30188.5	56993.4	22887	27487.9	15695.1	14318.9	15762.1	35879.7	14582.9	28656.5	20196.6	17709.3	28185.1	36919.2	24734.6	14409.4	14784.6	20087.7	9869.64	12006.2	14001	22064.3	25294.8	14836.8	24286.3	32656.4	37777.1	26489.2	14426.5	13568.5	10661.5	12488.5	20168.6		14095.5	26996.4	30619.2
O00165	O00165	HAX1_HUMAN	HAX1	HCLS1-associated protein X-1	12950.1	14519.5	14320.3	14036	25217	18109.8	14207.7	18246	12901.3		19525.2	13284.8	25677.6	28519.8	28403.3		23616	13674.4	15720.5	24449.5	15434.8	12740.5	14097.2	16196.4	24808.1	25812.4	19954	24209.2	28327.9	15799.8	18387.1	33016.4	16045	15523.6	14619.7	15346.7	29961.8	33329.9	29004.7	25550.4	28543.1		28099.8	26254.3	17510.5
O00168	O00168	PLM_HUMAN	FXYD1	Phospholemman
O00170	O00170	AIP_HUMAN	AIP	AH receptor-interacting protein	70117.7	82998.3	76126.6	67456	73324.6	71268.6	69573	67857.6	64837.6	68084.1	77560.1	61376.6	68181.9	53504.3	69008.3	129580	53738	76392.4	81743.6	72662.9	43648.4	73895.2	46495.5	54631.7	53164.3	68619.4	59721.7	64440.8	57181.8	58320.9	53389.4	59753.3	62162.1	68867.3	63026.3	66297.3	62291.7	71453.2	75623.1	62485	78202.3	72353.9	70998	57147.5	72546.6
O00178	O00178	GTPB1_HUMAN	GTPBP1	GTP-binding protein 1	6731.58	6156.27	7357.78	7850.37	4782.19	6209.3	7027.87	7408.01	6348.38	8420.22	7186.41	7218.93	6915.16	5472.13	5234.76	15677.7	5661.46	7677.3	6111.61	6941.04	4503.79	6950.89	6856.89	6615.24	5796.74	7149.63	5249.5	6801.93	6516.26	6410.68	7350.25	7657.18	7485.08	6662.12	8707.35	6807.1	6365.72	5654.79	6367.12	5936.22	5763.71	9704.59	5429.73	6011.44	6660.26
O00182	O00182	LEG9_HUMAN	LGALS9	Galectin-9	11293.9	14176.6	10000.7	7271.05	12277	7382.24	5218.94	9412.63	8087.29		9077.69	7957.48	10202.8	7654.6	8406.2	12923.4	8998.81	13657.8	12951.7	8528.94	11449.4	9788.31	12751	8182.95	8926.71	9124.7		5498.13	6392.99	12463.6	11016.6	8801.75	13410.7	9247.63	8496.74	11682.6	8798.89	8476.92	7180.45	9158.63	9730.11		6393.79	9819.34	9435.63
O00186	O00186	STXB3_HUMAN	STXBP3	Syntaxin-binding protein 3	35081.5	35681.7	33390.9	37926.6	17235.7	16274.3	20535.8	45362.2	42776	45101	38452.9	35713.6	18603.7	19962.3	17165.6	32899.5	17798.6	37908.2	32861.3	27698.1	33708.7	36931.4	35094	17688.6	22604.1	21633.3	13686.7	14983.8	17390	36513.7	35240.9	21468.8	41344.8	45057.8	52681	40097.8	19351.4	26973.5	15412.4	16015.3	23412	27812.1	17537.6	27589.2	35872.1
O00192	O00192	ARVC_HUMAN	ARVCF	Splicing regulator ARVCF	10008.9	11610.8			13094.8	19998.2	21748.2	9379.9		13743.6	24365.9	11175.1	15754.9	16765.4	18769.8	13095.7	17241.2			16182.5	9221.97	9573.27		17604.8	17895.9	17272.8	18637.3	14782.7	20131.6			19902.6	13637.9	5822.97	11253.4	6386.93	23046.4	14611.2	11450.1	18837	18075.3	13803.8	16082	13555.5
O00193	O00193	SMAP_HUMAN	SMAP	Small acidic protein
O00194	O00194	RB27B_HUMAN	RAB27B	Ras-related protein Rab-27B					15093.3	28012.4	31751.1						23126.7	24735.5	20159.3		37838.2			16877.2				19830.7	28688.9	14335.1	35069.9	26098.5	28036.4			43068					27112.5	15701.4	23059.6	27978.6	18857.1	22925.7	25908.1	16913.8
O00203	O00203	AP3B1_HUMAN	AP3B1	AP-3 complex subunit beta-1	9008.68	10339.8	9816.98	9834.21	13299.3	9044.69	11262.9	9981.94	10008.6	13771.1	9617.74	11355.4	12539.1	13340.1	7356.27	19974.5	13901.8	12492.7	13848.2	12771	11678.6	10851.5	11913.7	10098.4	13630.2	12082.9	9308.86	9614.39	10367.7	11560.7	10053.4	10731.9	11825.6	9778.06	10708.7	10797.7	14036.5	9425.03	12527.5	12608.3	12691.8		11715.2	10416.9	9895.17
O00213	O00213	APBB1_HUMAN	APBB1	Amyloid beta precursor protein binding family B member 1	12777	11650.5	12840.5	14092	12768.5	13435.3	13952.1	14766.1	14164.1	23549.1	14709.2	13484	15613.3	18262.1	13225.2	23242	18952.3	12463.2	9386.98	13529.4	15568.7	16366.7	12614	14622.9	14134.4	16968.8	17759.7	13802	16937.6	11963.3	11760.6	16201.8	13899.9	16698.7	14077.1	12622.3	14916.2	9705.87	14752.5	14345.2	16095.2	17733.3	17072.9	14483.9	13344.6
O00214	O00214	LEG8_HUMAN	LGALS8	Galectin-8	13890.1	14766.3	16184.1	17214	6020.2	5084.71	6353.77	10557.4	13060.4	20154.5	15591.8	13441.2	6172.1	7419.56	7017.66		6329.37	14451.8	15958	9620.66	13507.6	16261.5	14582.2	6450.73	4973.72	7740.16	5864.9	5286.06	7506.38	17842.8	15253.3	8954.78	10796.6	17558	12243.5	18704.5	5970.68	9807	6536.15	6812.41	6289.05	11051.1	7147.06	15056.2	18987.8
O00217	O00217	NDUS8_HUMAN	NDUFS8	NADH dehydrogenase [ubiquinone] iron-sulfur protein 8, mitochondrial	119379	114382	92833.6	120811	91322.7	189129	194543	105929	120451	227736	102991	108715	211827	195688	165885	294264	172686	73956.8	81010.8	194244	129590	122100	107523	186070	205523	187420	229744	214420	193387	104297	124106	253901	162419	125383	119996	118834	234075	238464	254639	239709	257740	271259	215479	273597	124466
O00222	O00222	GRM8_HUMAN	GRM8	Metabotropic glutamate receptor 8						3804.9							3305.59		4251.04											3507.99	3052.84		4096.31								4200.49		4136.38	4459.46	3392.34		3386.73
O00231	O00231	PSD11_HUMAN	PSMD11	26S proteasome non-ATPase regulatory subunit 11	50084.5	55673.9	53760.1	43128.4	45915.1	61604.8	58494.5	56718.9	54907.1	78718.6	60245.5	42926.2	54615.2	50990.2	60583.9	85636.5	52530.7	50483.3	40366.3	43528.7	46830.9	57250.1	47627.6	57975.1	45903.9	51666.9	56898.4	59455.1	56207.6	53832.8	47159.6	64334.2	55050.5	49212.9	52349.3	45197.5	62298.4	54586.2	54201.6	60008.7	58107.2	79224.6	53047.4	40554.4	49207.3
O00232	O00232	PSD12_HUMAN	PSMD12	26S proteasome non-ATPase regulatory subunit 12	32821.1	27204.8	29939.2	28883.3	25023.7	29578.4	29820.9	30285.5	32264.6	42459.5	24634.6	29720.1	32214.5	31712.6	26399.2	59939.7	31912.9	21329	26691.7	27914.6	32558.7	33658.2	29584.9	33057.9	34098.8	27151.7	30233.3	28627.4	32968.8	28641.9	26836.8	35594.2	33966	30049.4	31716.4	30897	31206.3	35421.4	32610.3	33153.5	30927.7	39398.9	30934.3	30293.6	33367.9
O00233	O00233	PSMD9_HUMAN	PSMD9	26S proteasome non-ATPase regulatory subunit 9	45679.9	49730.5	49694.8	39260.5	40089.1	34924.4	26506	44251.7	45272.7	30792.7	44331.9	33734.8	33782	37949.2	33493.8	42230.2	37378	48399.9	45708.8	39028.7	41071.4	42116	37916.9	26279.1	32086.5	37363	28419.8	26742	33042.2	42581.7	34412.6	31920.9	39646.3	43558.5	40919.6	45536.5	31052.8	22413.5	31798.6	32380.8	30102.6		35639.3	41202.1	44253.3
O00241	O00241	SIRB1_HUMAN	SIRPB1	Signal-regulatory protein beta-1
O00244	O00244	ATOX1_HUMAN	ATOX1	Copper transport protein ATOX1	28323.7	25750.3	31963.7	30364.7	20314.4	24397.2	21491.6	28475.5	37773.3		21926.1	28682.9	29652.3	32344.9	23808.9		30204.8	20817.5	24330.5	22884.6	20458.5	21672.1	19475	17737.6	27487.6	17992.1	25793.3	16920.1	20268.2	31414.6	27759.1	16407.4	20316.6	26204.3	19541.1	25077	17910.8	19853.7	18431.3	20069.9	12128.7		19282.9	24068.3	22901.7
O00258	O00258	GET1_HUMAN	GET1	Guided entry of tail-anchored proteins factor 1						19578.8	23225.1			17790.8			22563.8	22341.5	18470.4	21883.9	19621.7							23314.3	20261.5	25316.4	30466.8	24779.6	20523.3											20496.2	26952.3		21541.9
O00264	O00264	PGRC1_HUMAN	PGRMC1	Membrane-associated progesterone receptor component 1	130552	122559	110906	116920	115227	133223	118614	104968	114567	125067	97239.9	94537.7	140294	110114	104217	249566	121493	114841	114906	143093	84700.6	87687.3	83948.1	156101	80515.4	106887	82943.3	98105.6	110192	130923	129157	120718	95135.6	89931.5	83187.4	87342.6	117749	101751	112234	129441	96245.2	102433	90425.7	76129.5	98932.9
O00273	O00273	DFFA_HUMAN	DFFA	DNA fragmentation factor subunit alpha	28783.7	40309.2	38445.2	11695.6	21319.5	25241.3	22928.1	19591.5	23418.7	51026.8	29438.3	23544.5	21721.7	10968.2	23289	106243	14729.5	23253.3	21355.5	14455.5	18578.9	38066	19853.1	22017.7	12582.5	11969.6	18190.6	26493.6	17537.6	24455.8	19289.8	19331.9	18157.8	29360.1	37655.9	21017	15779.7	13334.1	16256.2	16884.8	18628.6	38675.1	17616.4	12270.2	24651.9
O00291	O00291	HIP1_HUMAN	HIP1	Huntingtin-interacting protein 1	18574.2	20451.2	21875.4	21593.6	9616.07	7768.99	9494.01	19545.1	18959.5	17186.8	26115.2	19777.4	9368.71	10586.8	8798.23	15911.2	9180.68	33563.7	20777.5	16537.3	24078.1	20524.1	21773.4	9360.63	9783.53	10081.4	8363.27	7378.32	9621.61	22248	22152.6	10301.2	24806.5	22040	24765.3	20229.8	9593.65	10593.9	8657.25	8336.54	7882.95	13123.8	8483.28	18450.5	18127.5
O00299	O00299	CLIC1_HUMAN	CLIC1	Chloride intracellular channel protein 1	53357.8	49659.9	62323.9	32462.2	36803	36902.6	27707.7	39868.1	46815.5	59337.9	38840.7	36281.7	44689.3	29892.4	24816.6		38799.4	32476	46215.3	42518.2	41798.4	45621	43416.9	33071.3	34023.2	35441.1	24280	14172.6	26784.5	48034.7	40646	37376.9	47209.2	35086.4	42046.8	57452.7	37338.2	38517	25542.3	27984.2	37971.8	52323.8	25955.9	34371.2	54312.1
O00303	O00303	EIF3F_HUMAN	EIF3F	Eukaryotic translation initiation factor 3 subunit F	37333.2	39154.4	38235.2	37375.8	44195.6	45219	31321.8	37484.7	31300.5	18747.7	34474.8	30672.9	39023.7	31760.2	39763.9	14637.2	28170.5	38829	37718.7	41499.6	32567.2	36325.5	32032.8	44955.8	34445.6	39346.7	38692.2	39361.4	48110.1	40436.2	40645.5	37696.6	43606.4	37863.8	49535.1	38126.3	37754.8	55141.2	39851.8	45003.2	36662	17236.2	36843.3	38313.1	43705.7
O00305	O00305	CACB4_HUMAN	CACNB4	Voltage-dependent L-type calcium channel subunit beta-4	14413.3	10141.5	11692.9	14497.7	36301.4	46357.9	36121.1	10387	12047.6		9688.82		43159.2	38992.9	39501.6	45508.7	39948.1	10835.7	10386	14505.5	12462.3		11018.8	46626.2	36915.4	37836.8	51276	49444.6	42739.6	13795.8	13194.3	22872.8	14283.1	12708.2	13966.4	14370.8	42771.3	21824.3	50603.9	45914.2	48211.3	34110.6	45682.1	13572.8	10456.2
O00308	O00308	WWP2_HUMAN	WWP2	NEDD4-like E3 ubiquitin-protein ligase WWP2	7018.07	7161.87	8315.78	6405.22	6406.28	5413.53	4882.78	5554.69		9615.81	3843.48		4942.43	4950.88	4080.92	10826.9	5416		4438.78	7041.54		7192.99	4107.34	5259.45	4896.75	5949.28	5223.8	5096.25	5160.48	5829.72	6068.07	4609.14		6984.43		7481.64	5797.49	5835.75	5659.63	4862.51	5358.33		4755.66	5782.78
O00330	O00330	ODPX_HUMAN	PDHX	Pyruvate dehydrogenase protein X component, mitochondrial	24582.3	21716.5	21714.8	21707.4	38291.1	43364.2	41801	27830.1	24099.8	39114.9	27362.3	27833.6	39035.2	39233.9	41371.4	99444.4	42970.9	25312.9	30719.1	40187.7	24441	27875.3	25889.4	41938.4	46275.7	42423.9	44407	43625.9	40425.4	24442.3	30177.9	50749.4	26982.8	21688.7	29475.8	26183	51527.9	53971.5	39619.7	45023.5	43216.7	51190.5	39120.5	50844.9	26157.5
O00391	O00391	QSOX1_HUMAN	QSOX1	Sulfhydryl oxidase 1							4829.02				4347.12		4551.36	4903.01			5969.21							4719.27	4417.33	5776.74	5280.19	6564.51	5633.51					4187.49			6408.49		4493.1	5180.29			5442.62
O00399	O00399	DCTN6_HUMAN	DCTN6	Dynactin subunit 6	10226.5	10405.3	8220.76	13853.2	5110.33	7552.05	7998.74	8636.07	10443.2	6068.61	6796.12	11412	5174.32	4212.88	8322.6	11000.7	9957.05	11328.7	7424.7	6917.55				7045.15	4869.55	4890.88	6962.01	6613.71	5842.04	10081.9	8363.26	4898.56	8181.04	7258.73	5684.32	6401.12	5047.71	6106.85	4847.51	4724.92	4154.07		6118.51	6088.23	6021.37
O00400	O00400	ACATN_HUMAN	SLC33A1	Acetyl-coenzyme A transporter 1
O00401	O00401	WASL_HUMAN	WASL	Actin nucleation-promoting factor WASL	23049.5	20400.1	22766.4	30060.4	27726	19883	21370.4	33604.7	20670.6	27525.1	37717.4	19629	26170	49607.3	30740.3	30462.8	35570.5	35819.3	29484.3	21365.9	37264.6	21630.7	40626.8	18022.2	48240.5	28236.9	34562.5	32197.3	29177.7	26796.4	27378.6	24315.1	36794.2	27244.1	19474	33057.3	26108.2	17735.6	36276	25775.5	18718		32328.3	31976.6	33635.2
O00408	O00408	PDE2A_HUMAN	PDE2A	cGMP-dependent 3',5'-cyclic phosphodiesterase	21261.7	23634	22846.2	23998.8	143475	240982	229775	23625.1	36644.4	67213.1	31153.1	22885.8	289225	368864	192423	320199	341875	44372.8	20311.6	14958	34316.4	22337.2	27266.2	282988	258402	311385	343735	354103	306032	25464.6	23864.4	47102.7	30455.1	31591.6	27279.2	19698	240925	30671.3	327913	333180	355759	171759	405545	43406	21051.2
O00410	O00410	IPO5_HUMAN	IPO5	Importin-5	55408.7	54591.4	66309.7	56677.8	49160.9	56530.9	60615.4	62238.7	58478.1	65924.6	62019.8	60618.1	61500.1	55962.9	52579.5	83520.5	65102	53271.5	47176.7	48774.1	56916.4	52407.6	58975.3	57084.2	56851.1	65272.4	57641.8	51573.8	49963.5	53002.3	48055.1	50528.6	59159.6	62382.2	52886.5	57763.3	53666.2	45635.9	52466.4	57160.2	65931.2	69617.9	56417.9	59447.4	51591.5
O00411	O00411	RPOM_HUMAN	POLRMT	DNA-directed RNA polymerase, mitochondrial							4130.67		6229.87					8236.11	3801.77									4487.18	5880.95	7423.01	5141.24	5887.74	7886.28		7007.67	5275.79	6381.8		6172.84		7699.56		5262.48	8538.73			4361.78	7663.46
O00422	O00422	SAP18_HUMAN	SAP18	Histone deacetylase complex subunit SAP18																								1895.44
O00423	O00423	EMAL1_HUMAN	EML1	Echinoderm microtubule-associated protein-like 1	11550.2	10458	13535.1	11033.5	10647.6	8953.38		10861	9489.84		9182.06		11023.1	10765.6	9449.17		10552.6	10957.9	11445.6	10140.5	10382.7	14259	10175.4	10472.7	11580.2	12456.4	10147.7	10719.2	10017.4	12263.6	12856.8	7642.83	11332.2	13262.7	10925.6	11012.3	10307.9		11284.6	10026.5	11192.7		10673.2	8720.53	9783.28
O00429	O00429	DNM1L_HUMAN	DNM1L	Dynamin-1-like protein	86224.7	80860.7	98970.4	82237.9	140700	146082	131139	99215.6	86662.4	110369	114925	79021.5	154220	181681	146782	199335	169019	94082.9	94176.5	103707	107819	83155.8	107678	141797	148985	147879	147569	137659	151935	92961.6	87701.2	143702	87521.3	83448.5	81125.1	91035.1	143680	105861	171278	149452	139815	145919	154919	112686	85748.7
O00442	O00442	RTCA_HUMAN	RTCA	RNA 3'-terminal phosphate cyclase	44809.2	42542.1	34367.9	76841.5	30199.2	20624.2	33737.4	44549	36149.2	23956	47783.7	48178.2	24665.7	39341.4	30929.6	19852.6	38712.9	43167.7	51218.4	60355.2	29803.7	38963.8	44146.5	28419.6	41992.3	36570.1	19941.2	26244.8	27286.4	68709.3	57876.1	38563.9	43313.7	53864.9	55926.4	65843.8	39969.3	31601.5		33571.7	26122	61569	32242.1	34442.4	61112.6
O00443	O00443	P3C2A_HUMAN	PIK3C2A	Phosphatidylinositol 4-phosphate 3-kinase C2 domain-containing subunit alpha		4453.61	4723.86		5707.11	2407.68	4738.87	3758.52	2524.93				3327.78	3167.56	3776.2	11467.8	3821.3		5997.52					3811.6	3559.69	4187.65	3883.44	2444.17	3043.52			4125.98		3700.91		2980.17	5420.78		3907.55	4147.53	4371.36	7399.48	3058.51	3583.19
O00445	O00445	SYT5_HUMAN	SYT5	Synaptotagmin-5	8368.88	5294.58			46965.5	78195.9	59990.3		5450.89		7672.21	10004.9	75254.1	69808.8	67949.9	61720.9	103242	9302.62		14229.7	8517.73			60926.7	79446.6	62268.3	94679.8	65722.5	81037.7	7821.9	12278.8	31295.8	7295.9	6174.92			67497.1	13459.2	76377.2	90324.6	81929.1	24980.3	82602.1	13657.3
O00451	O00451	GFRA2_HUMAN	GFRA2	GDNF family receptor alpha-2			13249.3		5899.73												8152.57			17165.4							8659.32		9096.58			23317.7			8469.46									16437.2
O00458	O00458	IFRD1_HUMAN	IFRD1	Interferon-related developmental regulator 1
O00459	O00459	P85B_HUMAN	PIK3R2	Phosphatidylinositol 3-kinase regulatory subunit beta	4471.88	4438.25	3353.18	4198.13		7905.21	8966.77	4480.85	4381.6	4441.16	2555.73	3328.5	7858.23	7113.51	6520.93	10257.9	8184.45	3907.49		5811.2				8647.51	8211.84	5421.38			7646.74	3267.11	3089.8	4055.12					6995.44	5809.01	6148.27	8538.9	4016.64			3900.56
O00461	O00461	GOLI4_HUMAN	GOLIM4	Golgi integral membrane protein 4
O00462	O00462	MANBA_HUMAN	MANBA	Beta-mannosidase	5407.45	4510.18				3414.73			5324.56			6151.4								4772.79	4354.88	3607.95		6011	4084.61		3945.24		3460.41							4960.82	3694.57		3265.04	3994.24	4011.27				5805.47
O00468	O00468	AGRIN_HUMAN	AGRN	Agrin	45791.6	41616.1	44753.7	50751.3	77367.5	47367.2	56064.3	46819.7	43753.2	55356.1	42251.7	48192.9	58245.2	51036.7	61582.7	55149.6	72867.6	53597.8	60646.5	54420.9	48371.3	55374.5	47839.8	57758	80170.7	49238.5	60539.1	61947.7	64672.9	57823	52710.6	62959.7	53410.3	36133.1	47663.7	50529.4	62034.4	56334.7	58924.7	53134.5	42508.7	78840.5	59064.5	73968.9	50863.2
O00471	O00471	EXOC5_HUMAN	EXOC5	Exocyst complex component 5	12283.4	15111	16622.7	10812.2	17124.9	19320	15166.5	15709.6	13848.1	31136	19421.1	12705.6	21849	18826.7	21577.3		19286.8	17773.3	20152.2	15167	18672	19578.8	20130.5	16025.2	21973.7	19261.9	23021.2	19758.1	21609.2	18750.2	16829.6	21561.5	22909.1	19821.5	18659.7	18433.4	20235.3	13457.8	23320.2	21456.7	21860.7	25454.4	22427.4	18609.6	18562.6
O00478	O00478	BT3A3_HUMAN	BTN3A3	Butyrophilin subfamily 3 member A3		12565	14688	14350.7	10379.8	16972.7	14933.7	16064.6	17753.3	37049.5	14387.9	18224.2	18358.3	13934.7	16693.6	36443.5	22642.9	22793.4		13517.9	9251.17		10941.3	23967.4	14360.5	13623.9	16381.9		13081.2	11023.5	22535.8	14911.8	17764.6		14258.3	13341.4	12937	14431.4	12345	14345.1			14150.4	18014.5	14353.5
O00483	O00483	NDUA4_HUMAN	NDUFA4	Cytochrome c oxidase subunit NDUFA4	120830	102395	100995	140018	256546	274341	176273	152354	154948	71464.9	177157	82417.6	280415	331622	319065	80550.9	214205	193828	139723	244759	207335	105968	157813	217890	229374	269286	334165	263047	219297	115800	117703	239695	174686	138992	96562.6	166616	237167	271309	255545	246152	283171	48997.9	362664	248140	124910
O00487	O00487	PSDE_HUMAN	PSMD14	26S proteasome non-ATPase regulatory subunit 14	28418.1	33147.9	30820	34943.8	29143.5	26859.9	35965.9	24732.7	24281	32705.6	31670.8	20659.9	28717.9	24600.1	29411.3	27801.7	22229.9	26317.8	31916	28926.3	34452.5	27695.2	33789.4	28279.9	25509.1	25189.7	21934.1	26759.7	27479.1	38565.3	39055.2	31830.4	30621.2	27621.9	29275.4	30988.5	35822.9	20525.6	27208.6	27995.4	26372.5		29607.6	21755.8	26930
O00499	O00499	BIN1_HUMAN	BIN1	Myc box-dependent-interacting protein 1	363277	355151	317703	361643	229834	175710	207164	520813	351692	439316	504636	371395	200170	210267	215754	416573	198506	686607	313300	362969	402403	329260	315767	203672	177874	217852	168036	190711	149260	356479	404720	257097	463844	440294	345922	367705	184665	264743	164593	198386	187059	192686	198958	339359	305205
O00501	O00501	CLD5_HUMAN	CLDN5	Claudin-5													2636.27				3752.47				6538.15								3924.97
O00505	O00505	IMA4_HUMAN	KPNA3	Importin subunit alpha-4	30544.8	39090.1	34744.3	38073.8	29770.6	34071.9	24972.1	35657.7	28312.6	20537.6	42764.4	35129.9	36276.6	34177.9	37772.4	7316.73	33882.9	37329.4	35455.9	31694.9	45457.5	38229.8	43521.9	28322	26594.3	36903.7	32313.4	33285.1	29774.2	36374.2	31586.2	40580.6	43272.2	48365.3	43927.2	43110.4	33004.9	25364.3	39241.2	33688.1	38818	23947.9	37169.2	37635.3	47902.9
O00506	O00506	STK25_HUMAN	STK25	Serine/threonine-protein kinase 25		12140.9	12442.9	7338.62	11113.8	6752.54		8332.02	9243		8341.14							8209.39	6476.5	8952.79	6453.87	8745.58	4001.01	7349.47		5134.18	11868.1	9764.59		8042.8	15609.6	3964.2		9928.2		10315.1		8167.06		5538.36			6683.95	7618.79	8396.42
O00507	O00507	USP9Y_HUMAN	USP9Y	Ubiquitin carboxyl-terminal hydrolase 9Y
O00519	O00519	FAAH1_HUMAN	FAAH	Fatty-acid amide hydrolase 1	14051.8	17521.2	24685.1	22001.9	16988.8	12264.7	12162.2	17848.2	17604.2	20564	20680.9	17024.6	14775.6	12709.3	13373.6	27309	15894.5	15268.7	18670.5	11633.8	21296.8	18467.7	19490.3	13025.5	16474.3	13803.7	12342.1	13750.1	11461	16584.8	13674.5	10620.3	11418	14098.2	12063.2	15225.1	12386.2	8547.03	10852.1	9688.08	11575.9	14462.3	12307.2	12505.3	15755.6
O00533	O00533	NCHL1_HUMAN	CHL1	Neural cell adhesion molecule L1-like protein	44068.6	28868.3	32192.2	29793.7	50960.7	67705.5	60655.3	41690	36331.9	77331.6	33764.4	40851.7	96254.4	82101.3	88876.8	123008	80092.5	46697	31747.1	58364.6	39538.5	22044.2	35530.8	63932.3	62318.8	71172.3	88210.7	72003.5	67977.6	32613.3	39359.8	64082	28928.1	17218.5	26724.5	28455.7	56580.3	53460.8	64558.7	68403.1	63480.8	62956.3	63970.7	56113.4	29416.3
O00534	O00534	VMA5A_HUMAN	VWA5A	von Willebrand factor A domain-containing protein 5A	77326.5	75222.8	92776.7	77996.9	72798.8	83054.2	68941.6	53351.5	69989.3	142364	74736.3	66855.4	68113.6	74873.4	87615.4	84325.4	81212.4	92271	79572.2	83820.3	62435.3	79777.9	80113.6	72048.8	79973.8	67693.7	72895.1	75322.7	83856	89809.1	71308.3	121934	66383.6	86005.1	76428.1	76905.5	72192.5	54877.8	79423.9	81160.1	73906.3	84022.9	79502.5	77510.3	69716.3
O00555	O00555	CAC1A_HUMAN	CACNA1A	Voltage-dependent P/Q-type calcium channel subunit alpha-1A					12778.3	20337.6	15222.3						17704.6	14715.9	17227.5	30428.8	12053.8							16865.7	12527.4	14516.9	21510.6	26772.5	14110.6			11272.2					11707.2	9812.42	17237.2	18127.2	22076.3	23948.4	24481.1
O00560	O00560	SDCB1_HUMAN	SDCBP	Syntenin-1	63141.4	67229.2	66682.5	58640	43366.4	40928.2	44776.2	51633.9	61592.2	51632.8	60498.6	53769.4	41492.8	39916	47299.6	69180.8	41059.6	62440.1	56064.9	42604	38960.7	70199.2	49500	48266.7	31957	41587.1	28077.3	39598.9	36348.9	69123.5	56883	30502.6	41725.9	56246.2	57097.7	48068.1	42605.4	45113.9	41557.8	44396.7	37508.4	41098.1	37821.8	39757.6	51447.3
O00562	O00562	PITM1_HUMAN	PITPNM1	Membrane-associated phosphatidylinositol transfer protein 1	16264.5	16429.5	15233.3	17828.7	23834.6	16473.2	13092.7	15319.1	16160		13840.7	14674.5	18891.7	20235.4	22939.2	25047.5	19215.8	16718.2	16624.8	25682.4	11833.5	14579.7	14320.9	19658.4	18306.6	21266.7	19878.5	23391	23952.9	15737	17233	30514	15665.7	15040.4	12173.1	14426.2	22120.1	15443.3	23612.5	20681.5	18544.7	7558.45	18274.5	22095	17849.1
O00567	O00567	NOP56_HUMAN	NOP56	Nucleolar protein 56	15560	12627.7	12547	13126	11322.9	15397.6	13598.1	12128.5	11858.5	21799.6	12777.9	14548.6	12931.2	10135.6	12389.7	26338.2	11605	13573.3	11710.1	12911.7	8521.38	11955.4	8789.57	13983.5	8700.89	10411.1	9878.98	12450.7	12107.7	14223.4	14364.1	16798.6	14035.7	9307.29	10806.9	9638.54	12248.1	23352.7	10756.4	12254.7	9840.62	15460.2	11917.4	10868.8	11465.6
O00571	O15523;O00571	DDX3X_HUMAN	DDX3X	ATP-dependent RNA helicase DDX3X	50028.3	46500.4	47919.4	43114	64002.8	53871.6	50274	51162.2	43458.3	53088.4	47098.5	42072.1	51134.1	45009.2	58414.7	86849.8	38213.8	45489.9	43023.7	48311.4	39377.3	50433.6	45500.7	59471.9	42963.8	49426.6	44364.9	52620.5	54828.6	43666.8	54784	55471.7	47818.4	45617.9	46376.4	45406.8	46143.5	75601.8	51230.5	51789	50641.1	51763	45689.4	48688.8	51701.9
O00584	O00584	RNT2_HUMAN	RNASET2	Ribonuclease T2	21749.4	30036.6	18984.8	24365.2	19819.3	21104.6	26525.9	22504.3	20058.5	32621.4		20204.2	21997.4	19217.2	20778.2	28651.6	18735.4	42691.4	28222	25402.1	24481.2		22401.5	23124.2		20120.5	15428.4	17095.4	15617.5	46369.9	36081.3	20879.8	36319	57037.9	18968.9	32671.4	25352.4	36107.6	18445.8	19343.2	46817.6	34879.6	18722.7	19104.5	31355.9
O00592	O00592	PODXL_HUMAN	PODXL	Podocalyxin					24551.6	20665.9		22937.8					18135.8	23000.6	24299.4		33761.4	24011.5	18598.7	27092	14983.9		16506		32814.3	28755.6	19867.7	18675.9	36516.7			18103.1				16945.4	23479.7		16217.7	20996.9			20694.8	32094.8
O00625	O00625	PIR_HUMAN	PIR	Pirin	21239.8	26980.1	22116.6	33883.5	16456.6	15518.2	23119.5	33082.5	28592.8	32091.8	18905.4	31772.5	19377.1	19075.9	19052.1	32727.4	19095	17536.2	22641.8	23953.2	17511.3	19157	20407.2	11479.9	14789.5	16181.5	12401.5	11677.7	15809.9	31184.1	29856.6	15087.2	28371	29332	30318.6	22537.8	18951.3	22581.1	15321.1	16510.5	18693.1	21065.7	14527.5	27855.1	19062.9
O00629	O00629	IMA3_HUMAN	KPNA4	Importin subunit alpha-3	7984.11	7782.02		5263.11	5365.06	5272.05	6830.99	5495.38					8475.25	6410.72	5840.44	11818.1	6612.85	4013.27		4237.83	9743.67	5061.32		8494.15		4048.36	5771.35	4050	4055.49			6332.01				5681.99			7859.2	5951.5	5804.7		4975.94	5357.41	5503.55
O00743	O00743	PPP6_HUMAN	PPP6C	Serine/threonine-protein phosphatase 6 catalytic subunit	10879.1	11323.6	9210.09	11635.1	7366.43	9216.04	14118.6	6507.14	12998.5	14775.5	10899.9		10154.9	10794.6	7302.2	37639	11541.1	9923.3	6389.05	11437.4	10933.4	9006.07	7321.73	12404.8	8673.59	7476.98	10361.1	10281.1	7520	12802.6	11238.3	11311.1	13361.5	12105.7	10521.7	10050.3	13089.5	9811.02	12069.9	11464.9	10755.2	13751.8	10788.6	9889.47	11081.5
O00750	O00750	P3C2B_HUMAN	PIK3C2B	Phosphatidylinositol 4-phosphate 3-kinase C2 domain-containing subunit beta	5900.55	7075.18				1871.5		6169.01		7630.5	4909.79			2693.75				6283.21	5557.3	3960.13		4776.57								4684.53	6014.61		6416.78	5361.78
O00754	O00754	MA2B1_HUMAN	MAN2B1	Lysosomal alpha-mannosidase	3893.33	4556.38	5149.56	6412.25	2120.14			6396.15				4370.92			4742.68			6455.79		5934.22	5618.47	6974.2	4212.46	5125.53		5624.42	4924.16	4726.33		7044.61		5191.63	7780.92	7167.59	5062.51	5704.32	5581.8		4028.77	5394.63	7178.22			5732.92	5104.13
O00764	O00764	PDXK_HUMAN	PDXK	Pyridoxal kinase	91613.6	97541.2	96576.5	77935.2	102243	112734	141210	98560.8	104901	148296	109097	91824.5	115684	113593	121437	217883	133972	92198.7	104752	85307.8	97962.5	84965.4	88406.2	117828	123451	110984	121862	108590	113990	99031	93443.5	146157	104197	102198	111705	97876.7	127796	82029.1	127337	127281	127488	152702	127886	93702.8	112931
O00767	O00767	SCD_HUMAN	SCD	Stearoyl-CoA desaturase
O14490	O14490	DLGP1_HUMAN	DLGAP1	Disks large-associated protein 1					5969.18								4950.05											4715.79	6021.13	4018.3	4207.39	4031.5				5662.15						12220.1						7876.81
O14495	O14495	PLPP3_HUMAN	PLPP3	Phospholipid phosphatase 3					70221.6	62704	46272.6	34659.6	29289.5		32850.4	27175.9	103060	79732.5	62026.9	64672.5	50730.6	32881.1		90066.9	33950.5	37741	29865	65985.2	72606.6	112708	70509.7	62829	53085.8		37878.4	134936	41806.3		45014	47554.7	108439	25518.6	111086	91287	106166	19376.3	76663.2	91894.5
O14513	O14513	NCKP5_HUMAN	NCKAP5	Nck-associated protein 5
O14521	O14521	DHSD_HUMAN	SDHD	Succinate dehydrogenase [ubiquinone] cytochrome b small subunit, mitochondrial
O14522	O14522	PTPRT_HUMAN	PTPRT	Receptor-type tyrosine-protein phosphatase T					4248.99	6229.77							4829.63	8700.96	6989.75		7492.52								7092.44	8736.7	6346.19		7814.84			6661.76					6764.55			6674.51			5760.1
O14523	O14523	C2C2L_HUMAN	C2CD2L	Phospholipid transfer protein C2CD2L	14627	13202.3	13240.1	14450.3	29767.6	38996.8	30763.4	12489.6	14242.4	36463.8	11793.3	15040.9	38785.3	41061	41443.2	30111.1	48556.5	17269.6	12680.1	15978.1	15452.7	16171.9	13223.4	39209.9	45716.2	38780.8	43123.9	41805.9	50197.2	14834.7	14905.5	22673.2	16170.4	13427.3	16034.4	13326.7	35743.7	17870.4	53685.7	45042.3	34421	40196.6	40096.6	16316.8	14765.9
O14525	O14525	ASTN1_HUMAN	ASTN1	Astrotactin-1	4330.8				6291.1	9786.71	10676.5						10792.7	11253.1	10118.8		13184.2							9342.01	11248.5	8703.7	12616.4	9152.08	11351.2			9098.23					8571.3		11074.5	10107.8	9476.12	10174.7	9456.21
O14526	O14526	FCHO1_HUMAN	FCHO1	F-BAR domain only protein 1	10534.3	13532.6	9632.27	10329			4131.74	14243.9	8020.98		12052.1		4002.09					17496.9	9757.47	9539.17	11404.5	8346.62								8795.6	9754.3	5257.6	13650.5	6619.53	8627.37	6518.94					3606.31				9283.36
O14530	O14530	TXND9_HUMAN	TXNDC9	Thioredoxin domain-containing protein 9			4139.49		5751.86	5784.93	4112.56	5452.66	6087.9	9002.23	5616.17		2428.67	3904.32	3521.32		4290.28	3157.35						4592.74	4919.61	4754.46	5075.85	5088.74	3016.12			3481.09	3886.16	4969.13	3526.04	10654.7		5096.65	4220.15	3576.68	4291.48	5534.42	2877.79		3977.82
O14531	O14531	DPYL4_HUMAN	DPYSL4	Dihydropyrimidinase-related protein 4	82989.9	101114	103857	71139.8	129583	190412	166121	82524.4	92006.6	155526	117782	71558.7	155273	156299	214762	204621	149451	110098	83520.8	70400.9	109146	135364	114322	169613	163322	136229	198871	244923	154176	108202	66931.8	118592	102492	84877.5	108351	95405.4	157229	54696.9	236259	192180	145007	183058	236420	58472.9	74960.4
O14548	O14548	COX7R_HUMAN	COX7A2L	Cytochrome c oxidase subunit 7A-related protein, mitochondrial	18116.9	14122			23690.8	29391.3	26601.4	15892.1	20025.6	20161.4	19511.8		30816.5	28551.9	25599.7		19567.2	15874.1	17142.6	23949.3	15969.8	18384.2	13668.9	29083.3	17532.7	21159.5	33949.4	24036.4	20411.1	12627.4	20146.9	17618.2	16137.5	13397.5		17921.2	28399.9	28567.5	23254.4	19897.1	23223.5		24343.9	24583
O14558	O14558	HSPB6_HUMAN	HSPB6	Heat shock protein beta-6	41881.3	65879.8	68725.1	51676.6	39267.4	36372.6	39935.5	40169.2	40228.2	42147.3	41216.1	51155.7	54237.3	18536.7	31804.5	84145.6	35489	31880.9	36674.9	37625.7	24966.9	70760.9	16278.3	39531.9	7932.93	45342.1	26015	19358.8	20767	50737.5	37346.9	19948	34849.1	51105	44132.4	54644.3	47596.2	21071.5	21698.2	27396.9	68987.6	76518.6	36754.6	18805.4	61422.8
O14561	O14561	ACPM_HUMAN	NDUFAB1	Acyl carrier protein, mitochondrial	19349.1	14058.5	17623.5	13511.7	22270.9	35512.3	27872.2	15934.9	20947.3	33829.8	20531.3	22057.6	30969.9	34576.1	34825.7	42192.3	37306.9	16123.7	14297.9	18127.3	11743.5	7590.81	14209.6	28729.1	18380.1	16963.1	29669.5	22214.5	39822.9	20401.4	31735.9	22096.2	20055.2	23001.6	12706.1	27558.3	35569.9	73688.5	22064.3	27989.3	35470.1	23168.7	48053.4	21296.9	17032.8
O14562	O14562	UBFD1_HUMAN	UBFD1	Ubiquitin domain-containing protein UBFD1	18772.1	32634.1			24598	29114.7		29947.6		21909.9	30380.3			23423.2	24805.9		23025.6	26745.5	29299.7		22073.6		19643.7	27642.1	23529.2	24592.1		18211.2	21272.1			25091.2			20833.4	28376.5	24772.8	20890.2	21681.6	22917.3	23894.4		21760.5		20519.1
O14576	O14576	DC1I1_HUMAN	DYNC1I1	Cytoplasmic dynein 1 intermediate chain 1	136276	145714	128915	153614	121658	123623	110251	156172	150916	164985	132016	128602	112708	137444	131880	262270	156557	151263	133023	102397	144073	157047	140150	121432	127913	126439	131634	146904	131181	147884	115693	102550	152958	171816	159069	152503	114991	93554.8	128119	128452	123747	148365	135046	104711	162093
O14578	O14578	CTRO_HUMAN	CIT	Citron Rho-interacting kinase	10179.2	9520.55	8837.33		18535.7	20260	18347.4	7686.77					17501.7	18813	17996.6	21442.7	17206.4	12040.5		12927.3			9506.11	21129.6	19850.5	18948.6	19877.6	22501.2	21257.3	10487.8	9026.45	25515.9	8246.66	9229.02	8793.81	8028.16	19182.6	12574.4	20762.6	21460.9	18806.6	21185.6	18979.8	11380.9
O14579	O14579	COPE_HUMAN	COPE	Coatomer subunit epsilon	18709.7	19031.4	19272	16697.8	13197.5	14179	15855.3	15708.7	18138.3	16013.9	11584.3	18903.2	14961.7	29773.2	17468.1	14159.1	21842.6	18355.2	17110.6	14247.5	14869.8	12609.6	11562.2	17932.5	38916.7	16126.7	13964	15131.5	31778.4	16293.3	19347.9	18927.8	16509.2	17911.5	18997.8	17994.5	17673.3	26600.4	17701.2	19752.8	16828.3	16403.6	16591.6	12959.2	17699.2
O14594	O14594	NCAN_HUMAN	NCAN	Neurocan core protein	79082.5	72972.5	66177.8	90781	56065	30472.8	13695.9	70421.4	89505.7	59391.9	87515	75639	26050.6	45974.4	50270.1	58047.6	21453.8	57096.2	163559	88733.6	78909.9	83807.8	112099	36438.8	34853.9	52122.3	29397.5	42676.2	33880.7	91051	92337.4	42889	91370.5	84577.8	54701.9	81317.3	73849.4	45187.4	34132.6	35002.6	29998.9	54533.2	30344.3	114882	98089.6
O14602;P47813	O14602;P47813	IF1AX_HUMAN;IF1AY_HUMAN	EIF1AX;EIF1AY	Eukaryotic translation initiation factor 1A, Y-chromosomal	21687.8	24001.7	22492.5	21986.3	20016.4	23822	21470	17491.8	25871.6	21747.6	23822.9	18737.4	15120.8	11108.8	17868	64020.5	12761.2	18776.5	14815.3	18723.4	22012	17715.1	18379	21822.1	11529	13389.1	22915.1	18296.9	13251.3	19808.8	18417.3	16132	22642.5	24417.5	20541.7	19490	15234.1	19433.8	12523.8	16662.6	21249.4	26160.5	17805.2	15157.4	17911.8
O14613	O14613	BORG1_HUMAN	CDC42EP2	Cdc42 effector protein 2		15239	14926.7	27070.5				22430	12959			17364.2						21021.8				15319.8								19351.3	23398.7		17702.7	16807.9	14989.8	18280.9					7854.72
O14617	O14617	AP3D1_HUMAN	AP3D1	AP-3 complex subunit delta-1	26208.3	23061.6	21417.2	27698.4	24024.4	35953.1	38079.7	26611.3	24454.8	35623.8	22343.8	25586.5	41358.8	44075.2	34485.8	86399.9	40263.2	18662.7	19276.3	25327.4	27410.3	27736.4	27002.9	34721.2	40871.6	34928.9	49763.7	44456.9	44335.1	24701.1	24284.6	42116	29308.8	30799.7	23780.6	29432.5	36135.1	24476.3	46476.2	48832	44943.7	39762.5	44282.3	27469.1	26044
O14618	O14618	CCS_HUMAN	CCS	Copper chaperone for superoxide dismutase					30727.2			15339.9			34813		21311.8	29670	20396.4		24890.8	30799.3		31750.3	36751.1		33205.6	11394.2	29224.1	36949.8				27498.8		28471.7	21025	16001.1	11149.7	37765.5	36983.5		35564	24663.9	24679.7		35478.1	35770.6	26825.1
O14639	O14639	ABLM1_HUMAN	ABLIM1	Actin-binding LIM protein 1	32465.7	40548	45250.9	31817.9	25515.3	44127.3	39352.5	38164.6	20305.4	38567.6	27116.5	29741	47209.9	21993.3	34547.7	75870.2	35392.1	17008.1	26084.2	28288.7	11307.6	61195.4	18311.4	25426.9	28298.6	21527.8	37439	35219.4	31737.7	22825.6	22385.9	35044.7	18112.2	29754.3	25509.9	24009.6	20270.7	30836.3	21678	28263.9	28641.7	14634.5	26355.7	22268	25362.9
O14653	O14653	GOSR2_HUMAN	GOSR2	Golgi SNAP receptor complex member 2						9640.12	7361.93			8509.54				5670.31	9679.15		5312.1							11022.8			5938.2	6771.69	5470.61			6172.02							8891.29	7462.87	5576.4
O14656	O14656	TOR1A_HUMAN	TOR1A	Torsin-1A	10143.3	9705.02	8860.53	12414	15898.8	14061.2	14578.4	10850.7	9803.85	17939.3	10918.6		14199.4	18066.5	11972.6	22714.7	20239	13870.6	10795.7	13648.7	13383.3			14504	16694.3	19706.8	13297.2	13111.5	16165.1	11222.2	13999.8	12873.2	12509.1	10211.3	10265.6	8730.52	19072.9	12585.7	13803	15397.9	20103.5	22053.5	11317.8	11966.1	8580.79
O14662	O14662	STX16_HUMAN	STX16	Syntaxin-16	9375.94		7787.2		9911.84	14044.3	16243.5	10839.2			13340		13573.6	13407.8	15224	9678.8	13685.9	10083		11462.6		12311.2		17236.5	15667.6	16478.2	14248.1	15557.2	18421.1		10740.6	18446.9	11879.5			9112.02			12888.4	13713.3	14552.5	17167.7	16614.5	11237.6	11216.2
O14672	O14672	ADA10_HUMAN	ADAM10	Disintegrin and metalloproteinase domain-containing protein 10	88179.9	57978.8	74703.6	104984	25975.9	24126.5	27290.7	74131	88966.7	78178.8	59984.1	70232.2	27918.5	38279.6	30107.9	35261.7	31389.6	88465.4	69679.4	53218.4	99157.8	83441.2	75618.8	34262.9	41798.2	39073.1	27862.5	25350.5	28043.9	71001.3	70577.7	45570.9	91394.1	63079.1	97598.3	88632.4	26247.7	42334.5	31817.9	29638.5	24326.8	36560.8	32746.6	94951.6	93565.6
O14733	O14733	MP2K7_HUMAN	MAP2K7	Dual specificity mitogen-activated protein kinase kinase 7	16184.5	16727.1	15178.4	17386.5	7062.69	8080.65	9464.31	14302.1	17924.9	17333.7	13852.8	14014.7	8579.27	9014.7	9574.52	19831	7341.85	11548.5	11897	12532.2	9485.57	19732.6	11663.3	9911.21	7513.25	10151.9	10079.4	10512.6	7481.38	14632.4	13968.9	10721.7	15830.3	17998.5	15856.3	15908.5	9055.19	12769.2	9353.42	10320.9	9370.6	15469.5	9415.85	13639.4	16032.6
O14734	O14734	ACOT8_HUMAN	ACOT8	Acyl-coenzyme A thioesterase 8	16731.6	19343.9	16300.9	23264.8	33217.4	30610.7	25900	20100.1	18021.3	21658.9	20113.2	14251.2	32984.5	35624.2	32610.6	33016.8	27144	19198.5	18244.2	20434.4	17828.8	19665.6	20502.8	29815.3	32036.1	39381.3	27515.7	31461.4	29812.1	18069.3	17376.8	19775.3	16132.4	24502.8	19204.4	21020.6	41151.8	18243.6	34765.6	33663.7	37846.8	30741	36081.3	24698.8	18151.1
O14735	O14735	CDIPT_HUMAN	CDIPT	CDP-diacylglycerol--inositol 3-phosphatidyltransferase	11790.9	12743.1	6137.39	8694.43		10622.4	13227.6		9797.44		10861.3	6160.62	14311.9	16978.6	15398	36371.3	11681.6			13152.8	18353.8	11097.6	11616.1	12436.2	18342.8	18185.8	18203	21293.5	14987.1	12870.9	9980.71	15841.1	13860.5	14779.2	14492.4	13419.9	22063.4	14061.2	19654.4	18936.8	23864.5	43437.5	16771.1	14364.8	15156.7
O14737	O14737	PDCD5_HUMAN	PDCD5	Programmed cell death protein 5	41865.2	47959.2	41875.1	41241.2	33627.2	35753.1	34862.2	39408	41373.2	45409.2	36479.6	37811.4	32365.4	38519.5	31841.9	56705.5	41181.1	36859.3	30431.2	34218.5	30962.1	37622.3	38501.7	33305.8	28935.8	23107.7	31066	29988.1	34216.6	37488.6	32256.3	31213	32018.5	42640.4	28119.8	33959.1	26551.3	23800.1	34151.7	31798.8	21965.7	29288.4	31183.4	35460.7	33217.7
O14744	O14744	ANM5_HUMAN	PRMT5	Protein arginine N-methyltransferase 5	42947.5	47771.7	43122.8	41745.9	41608	46246.6	44100.1	51173.9	40067.1	43944.4	50936.9	38188.9	46317	44878.8	47394.3	65790	46150.9	46259.9	46193.5	42010.6	45357	32403.8	45669.4	44216.3	42240.9	45859.9	40099.8	42181.9	35349.7	39195.1	46700.8	40512.4	41902.7	45689.1	40174.8	45152	41661.1	40689.3	40893.3	44396.9	47849.1	34568.8	47034.5	44135.5	39925.1
O14745	O14745	NHRF1_HUMAN	NHERF1	Na(+)/H(+) exchange regulatory cofactor NHE-RF1	374473	361492	354084	343009	176428	184403	181718	395692	391332	319379	311750	388233	196842	160652	180012	511611	179898	378569	308296	260642	304653	389458	284215	153517	168465	180423	172174	154536	146453	272174	304935	202921	292672	284462	435074	336596	138718	198237	149970	166188	128932	266800	164750	242375	291530
O14772	O14772	FPGT_HUMAN	FPGT	Fucose-1-phosphate guanylyltransferase	14612	16416.1											13200.6	11809.3								8844.86	21290.4		10019				7654.59	14153.8	15831.4	12688.1					13741.3		9468.18
O14773	O14773	TPP1_HUMAN	TPP1	Tripeptidyl-peptidase 1	245069	232148	114915	208034	118672	239812	241269	224096	224883	209653	183065	238560	240386	228641	280042	190324	230428	223379	193144	256228	169238	123317	153578	226765	241259	280335	205007	221979	199557	211838	242307	154328	190611	206912	210920	127702	245322	226100	183530	220988	207743	331708	187354	259703	189703
O14775	O14775	GNB5_HUMAN	GNB5	Guanine nucleotide-binding protein subunit beta-5	15553.1	19991.1		14204.9	44863.6	51642.8	44345.7	13496.8	15019		21049.2	11040	72672.7	86079.7	55357.1	102991	67585.9	19006.9	15055.8	30615.6	16544.3	15725.1	16443.8	64756.2	76226	66301.3	79350	79691.6	82012.6	18651.9	17779.4	55135.4	27350.3	15882.9	15870.1	13900.1	86905.5	28496.8	99114.3	79682.1	90380.6	77202.9	89411.6	27792.2	16353.4
O14776	O14776	TCRG1_HUMAN	TCERG1	Transcription elongation regulator 1		9671.75	12711.4	13696.8	8786.1	9924.5		12753			10419		10093.3	7974.69	7760.95		8648.06		11140.6	10803.3	9244.36	6543.72	10088.7			8677.59	7062.92	9172.63	8076.52	12984.3	13662.7	13449.4	12672.4	9561.42	9204.49	8411.35	8127.77		10586.6	9016.48			7375.5	11562.8	12180.9
O14782	O14782	KIF3C_HUMAN	KIF3C	Kinesin-like protein KIF3C					3926.1	3358.73					3062.64		3081.01	3651.81	4151.14				6359.4					2018.99	2888.15	4319.75	3068.67	2557.13	2750.33	3464.33		2821.18		4585.72	3515.42	5124.78	3890.73		4050.47	3216.68	3028.59		3842.47	4845.51	6546.57
O14787	O14787	TNPO2_HUMAN	TNPO2	Transportin-2	13568.4	13874.4	14122.3	15939	10824.6	22173.2	17090.5	13615.4	13492.8	27603.7	7760.97	10855.7	20367.5	21305.7	15694.4	39436.9	20246.9	10101.3	8309.33	15816.4	14346.6	15970	18966.7	16465.4	21014.7	19701.1	22349.2	24580.6	25397.9	13069	12568.9	26072.2	14129.8	16872.8	17462.7	13692.1	21477.3	17063.3	21005	25868.5	25431.7	31324.6	19534.5	15457.4	14108.5
O14807	O14807	RASM_HUMAN	MRAS	Ras-related protein M-Ras	24088.3	21616.9	23803.9	19300	20612	30034.3	31719.5	23471.5	24893.5	21893.9	24428.4	20938.5	28772.2	27659	28977	49282.9	26391.7	22435.2	21968.6	24711.3	27308.5	23389.1	23261.4	24441	23796.6	25708.7	25822.4	23146.1	26138.3	23510.2	21148.9	36915.8	18172.4	20443.2	26509.1	28696.1	24110.1	24000.3	30251.5	25105.8	30484.6	26535.6	25967.4	21294.4	28736.5
O14810	O14810	CPLX1_HUMAN	CPLX1	Complexin-1	143423	137474	147381	138424	99853.9	86251.1	67740.2	157498	145146	185385	99887.5	135587	82056	95669	80563	275686	74904	97671.4	102528	114764	115824	171447	84969.9	105817	77837.2	96092.9	119670	113860	101635	109714	108749	49829.6	118581	185178	127864	140013	82049	135820	114710	125273	110789	148549	105901	134941	143227
O14818	O14818	PSA7_HUMAN	PSMA7	Proteasome subunit alpha type-7	78681.4	79267.3	64653.8	76462.3	71141	106255	101315	67847.5	103994	114695	69842	96754	98551.2	95028.3	76931.6	98204	118751	71897.3	73698.9	74567.1	60553.2	73492.9	66644.3	118193	83410.6	80476.7	93774	96600.6	93344.1	77182.2	102098	77394.8	87504.8	74902.6	77798.1	74828.6	104159	106541	101985	96211.9	102659	129263	107528	81020.1	80765.6
O14827	O14827	RGRF2_HUMAN	RASGRF2	Ras-specific guanine nucleotide-releasing factor 2		10547.6	8555.59	7280.99	11961.1	7721.88	8638.69	7385.3	9662.18	8738.57	9036.61	6830.56	8541.2	11659.1	8128.26	30858.9	8150.2	9414.66	8764.46	6493.9	12961	10797.3	11089.5	8927.81	11664.4	11649.9	10648.2	10244.7	8358.49	7762.86	7493.69	7347.05	10599.4	8294.81	10987.3	8246.83	10511.3	3881.58	12165.5	9692.14	11516.5	25068.3	11899.9	14186.4	8668.05
O14828	O14828	SCAM3_HUMAN	SCAMP3	Secretory carrier-associated membrane protein 3	25529.5	24371.1	21352.2	20479	35295.1	46715.6	37799	20095.9	16891.5	16282.5	18617.7	16163.2	28665.7	30580.5	31565.3	64213	28794	22030.2	21049.6	16063.3	15848.3	22424.7	13521.8	33685.4	31073.5	21984	45207.4	36078.1	34143.9	22226.8	14238.4	29400.3	17705.6	18109.1	27226.8	16621.6	23534	17024.6	29469.6	29139.3	15692.3		23508.7	20287.3	18458.5
O14829	O14829	PPE1_HUMAN	PPEF1	Serine/threonine-protein phosphatase with EF-hands 1		6254.01	6058.39																											11262.8						8246.62								6417.34
O14841	O14841	OPLA_HUMAN	OPLAH	5-oxoprolinase	28031.1	23551.6	26064.5	23541.6	24784.1	21647.1	20879.2	19539.3	27585.7	20398.8	20724	26255.7	22060.8	15442.7	19547.9	20870.7	20695.3	24222.6	23975.9	20915.4	20821.3	22447.6	17905.1	18206.2	21541	19681.2	20238.4	20653.9	17526.7	24102.1	25140.8	18056.9	23259.6	20675.1	29806.7	18312.9	19163	24912	15106.9	20056.7	19064.1	25177.6	16628.5	22991.5	24364.7
O14874	O14874	BCKD_HUMAN	BCKDK	Branched-chain alpha-ketoacid dehydrogenase kinase	13657.7	11656.4	14079.6	11346.2	21046.7	18879.7	18038.3	12696.3	10621.9	6723.83		10139	18548.7	13081.2	17509.8		12277.9	11839	7994.88	15789.1	9118.22	12036.9	7619.95	23195.9	10737	14690.8	22089.8	26092.6	11921.4	7741.53	14402.2	14057.8	10337.4		10804.1	11691.2	14375.7	23521.5	12951.3	22063.2	19633.1	16743.7	17762.3	13568.4	6367.89
O14879	O14879	IFIT3_HUMAN	IFIT3	Interferon-induced protein with tetratricopeptide repeats 3			6569.08			7117.89	3532.03	7684.43	8009.73			7206.09	7160.93					5610.11		6811.81	7774.54	4406.95	4030.1	7086.95			6563.96	5707.56				9087.16			10168.7						6687.8		4455.58	7323.27	11385.8
O14880	O14880	MGST3_HUMAN	MGST3	Glutathione S-transferase 3, mitochondrial	74589.1	49939.3	28237.4	85741.8		78924.4	140472	41503.4	59113	73884.1	22805.5	72198.4	171873	207863	43113.2	36275.1	145936	12125.4	19641.1	127910	107129	104443	92398	158066	190465	91295.3	287296	185913	200472	87141.4	65862.8	170988	153817	108474	96016	104923	147723	169942	233383	261115	273297	147966	214566	195893	129928
O14907	O14907	TX1B3_HUMAN	TAX1BP3	Tax1-binding protein 3
O14908	Q8TF64;O14908	GIPC1_HUMAN	GIPC1	PDZ domain-containing protein GIPC1	23061.2	25224	25973.7	27494.4	15378.7	15418.1	16394.7	26487	24532.4	21390	27819.2	21245.9	16733.7	17329	18615.3	11508.2	16827.4	33593.4	30763.4	25294.9	29259.2	31864.2	25563.9	17976.2	15862	20907.3	14771.7	14964.4	14890.5	26519.5	25204.9	17278.5	26298.3	37344.7	35053	30133.5	15672.1	17281.1	16476.7	16024.5	18539.4	10838.9	17286.2	25676.9	29870.3
O14910	O14910;Q9HAP6	LIN7A_HUMAN	LIN7A	Protein lin-7 homolog A	22746	16296.1	18362	19433.6	67426.6	71608.6	61305.7	22370.2	17638.5		15924.5	11714.9	83371	51189.4	53973.1	38771.6	60477.8	16820.4	16619.1	41217.8	10488.6			69980.8	56188.6	50716.7	62358	53261	68520.4	14444.4	19752.8	77796.7		13067.1	14986.1	14888.5	54404.1	39318.4	62058.8	63533.8	60281.7		53025.3	35820.8	15058.8
O14917	O14917	PCD17_HUMAN	PCDH17	Protocadherin-17		3489.38			5207.15	7198.1	6812.4						7586.31	4993.28	5562.95	9215.98	7819.32			3796.16				4647.79	4524	4403.12	5723.37	5573.22	6921.9			5960.86					2846.19		5171.86	4686.48	5355.68		3972.89	4528.47
O14920	O14920	IKKB_HUMAN	IKBKB	Inhibitor of nuclear factor kappa-B kinase subunit beta													9591.22	8982.84	6440.87		8473.26					10505.6		7202.88	7560.59			8158.66	7047.32			5681.41					9106.78		9812.99	8274.83	9001.67
O14924	O14924	RGS12_HUMAN	RGS12	Regulator of G-protein signaling 12		21254.6															39402.6							27017.3								25042.8							32233.1	20017.1	33060.6		26050.3
O14925;Q5SRD1	O14925;Q5SRD1	TI23B_HUMAN;TIM23_HUMAN	TIMM23;TIMM23B	Mitochondrial import inner membrane translocase subunit Tim23
O14936	O14936	CSKP_HUMAN	CASK	Peripheral plasma membrane protein CASK	29091.3	29547	25821.2	25266.1	42835.3	55365.8	63458.8	28094.9	30236.8	35905.4	35159.6	25639.1	58874.1	47289.7	50325.2	81552.4	59704.5	25820.2	20953.3	31362.1	27226	23872.9	23127.9	49044.8	48668.5	45588	59736.4	57133.6	53066.5	26908.9	31614.2	50694.6	30998.2	19957.9	29885.7	25687.6	50398.9	30253.6	55781.8	57452.3	64210.7	55164	52257.5	29018.6	25194.8
O14939	O14939	PLD2_HUMAN	PLD2	Phospholipase D2	7859.42	8147.87	6986.23	8580.83	11051.9	8947.1	12534	8364.16	6960.48		5192.31	8403.44	13491.8	8407.71	9500.27	23848.8	8993.12	7773.24	3778.09	7730.36	5948.84	7427.25	6066.73	9998.85	10783.8	8037.84	7573.7	9359.77	8168.36	8276.14	7734.21	9385.41	7944.84	5819.72	8858.45	6833.9	10102.3	7893.34	9089.87	8958.51	11704.8	12496.2	9198.78	9019.87	5689.86
O14949	O14949	QCR8_HUMAN	UQCRQ	Cytochrome b-c1 complex subunit 8	53488.7	56667	55763.1	35214.1	103430	105855	73581.8	35047.7	44564.3	82215.9	111303	32724.4	90445.2	66733.7	94020	97439.7	70148.2	59547.6	54400.6	69589	56628.5	51645.7	46232.9	84460.6	72693.1	68683.5	87653.2	111639	79572.7	57061.8	56943.8	106093	73095.4	66516.3	81501.7	58672.5	121349	113115	125160	94346.4	104908	30772.9	110678	70832.4	60603
O14950;P19105	P19105;O14950	ML12A_HUMAN;ML12B_HUMAN	MYL12A;MYL12B	Myosin regulatory light chain 12B	87551	114317	117224	133514	104894	70381	48504.1	136450	84972.7	19605.9	111896	87698.2	105268	106941	105851	20879.5	99266.9	136397	136374	118914	126624	127700	134455	87530	86597.1	115833	73181	74570.9	85562	129170	108753	79576.7	113526	108989	108439	132530	104148	84234.9	94691.7	75307.9	114681	11296.7	97832.9	111622	124223
O14964	O14964	HGS_HUMAN	HGS	Hepatocyte growth factor-regulated tyrosine kinase substrate	43865.8	47525.6	41935.9	39636.4	44141.1	35150	26897.4	45191.8	36249.3	18322.2	48805.3	29951	35164.1	29602.4	35736	79003.5	29044.8	50646.3	39990.6	40383.8	36036.8	45867.4	28376.9	32172.1	26592.9	35208.1	31313.4	31558.4	31270.4	46858.4	41312	44940.1	46063.5	46574.8	44986.7	37271.4	35181.1	26731.8	33853.6	36455.2	34134.5	30873.9	29975.1	36337.5	37067.4
O14966	O14966	RAB7L_HUMAN	RAB29	Ras-related protein Rab-7L1		12169.6		9922.62	6888.82			8814.8			8920.59	9528.5	8823.1	10341.8			10353.3	11784.3			13794.1		12947.2	8431	9121.34	8655.27			8579.62			11262.5	12325.4	11134		12897.3			10309.5					9416.82	14450.3
O14972	O14972	VP26C_HUMAN	VPS26C	Vacuolar protein sorting-associated protein 26C	12081.8	12758.6	11631.3	8553.42	7103.08	9409.76	10191.2	9619.36	9863.96	19572.9	10001.7		9386.27	7626.67	9587.71	25031.2	8576.01	11029.5	12744.6	5276.5	11199.9	11279	11125.9	8169.36	9019.82	8176.12	8168.31	9507.54	8305.25	13249.5	8853.22	9420.03	10330.6	9837.66	10969	11777.6	10470.5	12304.1	10373.4	7862.06	9831.43		8489.08	8958.27	12390.2
O14974	O14974	MYPT1_HUMAN	PPP1R12A	Protein phosphatase 1 regulatory subunit 12A	13123.7	11440.8	12915.4	11217.3	12674.7	10681.8	10638.4	15010.2	9998.17	19302.4	11458.3	11664.2	9842.12	11879.6	11805.8	26311.9	10768	11609.5	10771.3	10408	10487.3	14212.9	8192.1	9743.17	10898.7	9029.2	10969.7	11976.6	11448.9	9229.69	9001.71	9809.63	9874.49	12194.9	9935.78	10152.8	7719.69	9476.87	9031.97	9074.27	8348.16	18455	10324	9483.19	8216.14
O14976	O14976	GAK_HUMAN	GAK	Cyclin-G-associated kinase	12360.2	14512.4	12695.4	14506.3	19386.2	21554.3	19066.4	13667.9	14716.6	13831.2	14811.4	14154.5	21507.2	22070.6	18466.8	21500.6	22665.1	15370.4	16561.3	15098.9	13757.2	14248.8	12132.8	21611.1	21724.1	20754.7	21966.4	24176	24976.3	13605	13413.7	19396	13601.7	13257.2	12249.4	12962	21015.3	16294.2	24144.2	23313	21350.3	23797.5	22614.3	14877.7	14687.5
O14979	O14979	HNRDL_HUMAN	HNRNPDL	Heterogeneous nuclear ribonucleoprotein D-like	19470	25375.4	19143.2	21073.2	13742.2	13804.8	15002.3	26096.4	21979	36385	13728.4	21243.1	9972.08	12752.5	20441.1	24113.9	11910.8	16883.2	13712.7	13992.3	15318	23680.1	13769.6	15394.4	16836.4	12432.8	15673.1	20463.4	16008.8	18247.8	17208.4	19213.8	20522.7	23943.1	20616.9	15584.5	10851.7	21427.1	12248.2	13745.5	17156.4	20361.7	16455.8	14851.6	16378
O14980	O14980	XPO1_HUMAN	XPO1	Exportin-1	32218	30268.4	33887.8	33275.7	18113.3	26877.1	26844.7	30032.9	31135	37368.2	29234.2	31352.7	27848.4	28069.1	25358.3	44884.1	29073.2	29034.6	25760.3	31091.9	32114.2	31561.7	30060.8	24564.4	27307.9	28135.9	29120.1	25223.3	27723.7	31442.8	33554.9	33573.2	35259.3	33905.5	36947.1	33479.6	25313	32429.8	29106.4	28606	30030.8	30912	27298.7	31339.7	33725.1
O14994	O14994	SYN3_HUMAN	SYN3	Synapsin-3	22334.2	26470.7	19951.4	25215.1	62549.2	98674	90049	15543.4	18239.7	33139.4	16875.3	23525	86982.9	88950.6	78524	110701	80750.7	9797.88	22613.7	36473.2	17234.2	23687	12437.1	112095	91107.3	76991.6	116409	126450	108753	19886.8	23775.6	54361.6	19225.6	21964.9	14412.5	20549.7	83287.5	28750.1	107993	104545	84259.3	125018	109968	39184.2	21317.5
O15013	O15013	ARHGA_HUMAN	ARHGEF10	Rho guanine nucleotide exchange factor 10			5144.98					2007.26	4407.56	6589.66	4526.32											6904.95						2857.71					5077.23	5207.13	5626.17	3484.13					3388.6
O15018	O15018	PDZD2_HUMAN	PDZD2	PDZ domain-containing protein 2						2957.36	5572.8	1943.66					7098.49	7544.59	3517.65		7693.73			2334.7				5099.59	4658.29	5371.77	5121.33	5251.59	6683.07			2396.36	2290.77				5677.55		7520.15	7253.74	6659.4		6125.42	2780.08
O15020	O15020	SPTN2_HUMAN	SPTBN2	Spectrin beta chain, non-erythrocytic 2	44649.9	51068.1	53040.4	44141.2	48895.4	47809.5	43528.8	39414.5	47524.4	57549.6	42643.4	38055.8	37771.2	38350	48117.8	91419.5	33313.2	38668.8	48723.8	45684.6	42028.2	57813.6	45177	50505.5	38520.8	40845	45062.9	50934.4	47421.9	55808	47760	57453.1	45678.8	51805.5	56121.7	49606.6	42952.3	57032.3	46527.3	50064.8	40983.7	63869.3	43537	41439.3	51963.9
O15027	O15027	SC16A_HUMAN	SEC16A	Protein transport protein Sec16A					6912.41	6334.31		5480.3							7557.32		3298.17			4138.35				9203.34	4527.24		7132.43	4276.06	4787.74			3436.88	3796.88	4655.09		3830.71	3749.32	7247.31	3706.68	3925.26	3659.77
O15031	O15031	PLXB2_HUMAN	PLXNB2	Plexin-B2	15038.2	14640.9	11656.7	17293.4	18677.6	13307.2	14801.4	17798.9	13322	31699.2	14320.9	15772.7	16504.5	14409.5	15953.8	37241.5	18220.8	14957.5	17771.9	15279.1	14465.5	15162.3	16281	15021.9	23295	18266.8	14594	15897.4	18382.6	16596.9	14462.2	20616.5	18399.8	13042.8	13402.5	15469.9	17264.1	16905.7	15940.6	16444.3	18293.7	22629.6	15364.3	19264	17378.8
O15034	O15034	RIMB2_HUMAN	RIMBP2	RIMS-binding protein 2			4281.82		4173.71	10302.9	7377.27						7571.13	5661.25	7889.35		6520.63			5333.75				7554.38	5618.96	5954.39	10873.5	9424.54	7103.67			8773.52			3113.94		7019.52	4948.16	8813.94	8937.41	5419.09		8404.74
O15040	O15040	TCPR2_HUMAN	TECPR2	Tectonin beta-propeller repeat-containing protein 2	22421	25391.6	17614.6	13375.6	9429.29	10362	18980.5	15686.5	17339	18368.7	16625.5	17991.6	14642.5	12283.6	9974.99		16134.1	16161.6	16583.3	13766.1	18053.6	17978	21033.8	12071.7	17763.7	14075	11260.7	12873.4	15191.2	18901.3	17806.4	13476.1	19190	15598.9	21633.3	15838.7	12857.8	13919.7	13902.4	11731.4	10680.3		13122.5	14906.3	19230.8
O15042	O15042	SR140_HUMAN	U2SURP	U2 snRNP-associated SURP motif-containing protein						6090.26						7255.86			5443.71	5380.74											3298.15				4405							12191.3
O15050	O15050	TRNK1_HUMAN	TRANK1	TPR and ankyrin repeat-containing protein 1				29496.7											14827.3		15266.7						22167.4	19386.3					18545.2				26598.5							18844.2			20820.9
O15056	O15056	SYNJ2_HUMAN	SYNJ2	Synaptojanin-2	11547.8	11890.1	13783.7	11511.1	5600.22	4119.3		13745.7	13171.1	13278.5	13157.5	10308.5	4951.85	5621.39				16754.3	10889.5	10342.8	14178.4	9360.4	13308	5875.82		6833.49	4090.14	3339.88		11454.5	14063.8	5019.65	12267.3	15780.9	15045.5	12652.3	5950.97	7883.96			4038.05	6562.08	5815.98	12541.7	9395.66
O15061	O15061	SYNEM_HUMAN	SYNM	Synemin	29455.4	27383.1	47406.6	22226.5	23219.1	21421.2	20734.2	38934.4	21875	46148.3	30440.9	29889.6	30697.8	12653.8	19712.2	57774.5	26291.7	26341.1	27846.6	22895.8	23326.8	40214	27776.2	15367.8	13654.6	22359.3	14910.9	15841.6	16592.5	37761	39973.4	19003.4	19317.9	24909.2	48854.4	32579.5	23654.5	29635.2	17076.8	16359.8	20357.3	30687.3	14168	18693.1	51027.6
O15066	O15066	KIF3B_HUMAN	KIF3B	Kinesin-like protein KIF3B	13417.4	13210.5	11545.9	16346.7	14943.4	13723.9	13225.2	14903.3	14222.3	39345.3	12059.3	15756.8	13503.4	11247.7	12393.8	41443	13134.1	12814.5	14077.2	10982	14070.3	16318.5	12597.8	17102.5	11639.2	14207.1	17256.6	15982.3	12735.8	13655.6	9818.01	10095.4	15510.7	14793.7	14896.9	14170.2	14247.4	9198.17	14331.2	14802.8	14652.2		14473.2	10921.6	16019.9
O15067	O15067	PUR4_HUMAN	PFAS	Phosphoribosylformylglycinamidine synthase	36424.6	34011.2	31253.4	38088.4	34620.7	30518.3	33361.4	36497.6	41108.3	46237.1	33540.5	40126.8	32827.7	30992.3	28312.5	37460.5	33973.6	33128.1	29889.5	34358.5	28012.1	36028.7	26387.4	32849.2	29844.3	31045.7	36587.3	32436	29488.1	33299.1	40097.8	25844	41010.5	33675.1	31843.4	33992.4	29557.5	32010.7	32948.6	32127.6	32115.2	34466.9	30550.7	36729.4	35541.7
O15068	O15068	MCF2L_HUMAN	MCF2L	Guanine nucleotide exchange factor DBS					4759.16	5239.28	3985.07						4563.25	5016.97	4497.66	14193.8	5819.51		2728.93					5481.74	3677.5		4756.26	3979.78	4259.23			4786.13					6123.78	4131.77	4309.56	4962.96	5250.08		3786.49	3935.98
O15069	O15069	NACAD_HUMAN	NACAD	NAC-alpha domain-containing protein 1	13432.2	13076.6	12762.4	12819.5	11533.3	11844.5	10690.3	11074.3	14022.8	16251	9668.64	13680.3	6357.26	9519.39	13098.6	37577.5	6472.01	9812.62	10012.6	10182.3	9225.38	11903.2	8423.86	14158.9	9630.53	8037.26	10061.8	13081.8	12627.4	11862.1	12045.2	7645.88	10403.8	12373.5	11655.5	11333.9	5233.81	16145.2	11137.9	8300.96	6984.34	10288.1	9871.26	9714.51	10536.7
O15075	O15075	DCLK1_HUMAN	DCLK1	Serine/threonine-protein kinase DCLK1	111584	128621	119737	107534	110530	93952.6	103242	129338	112598	138407	133569	111180	111690	103808	109389	338601	92730.8	111862	106213	94574.1	128168	125943	127960	111232	91935.8	97489.2	89874.6	89413.1	113409	115010	115419	127705	118642	108299	134802	112090	80715.3	100963	111654	103971	82152.2	135145	99091.8	98501.3	134551
O15079	O15079;Q9NX95	SNPH_HUMAN	SNPH	Syntaphilin	17066.4	14914.2	14582.7	16751.2	22703.7	18543.3	16844.4	20573.1	13261.3	21793.2	19461.5	16172.6	17484.7	24197.7	20367.7	35688.7	26359.3	19132.7	17095	19955.3	18610.2	19179.8	16710.8	19689.8	27822.6	20729.1	16941.9	19075.9	20344.5	14912.2	15138.3	19189.5	15736.6	16899	18479.5	18194.8	21339.2	16253.4	19602.5	22682	23705	17467.1	19894.9	22913.8	15491.9
O15083	O15083	ERC2_HUMAN	ERC2	ERC protein 2					8267.31	9939.47	7954.64						8277.75	9934.51	12498.8		11378.3			10002.1				7725.61	10830.4	7928.93	12392.2	11862.8	12587.5			9922.62					11585.1	8015.13	8826.15	11455.3	7129.28		10074
O15084	Q8N8A2;O15084	ANR28_HUMAN	ANKRD28	Serine/threonine-protein phosphatase 6 regulatory ankyrin repeat subunit A				7992.42	4260.74	6924.01	6360.22	5527.23	7238.43		5268.8	9429.16	7049.66	7540.96	6521.63		8081.09					6992.11		8022.39	9392.96	7396.64	6612.25		8225.88			4696.06	5752.26		5534.73		7551.46	5080.15	6789.26	7483.75	6462.97		7751.95		4297.84
O15085	O15085	ARHGB_HUMAN	ARHGEF11	Rho guanine nucleotide exchange factor 11	13526.8	14266.7	13563.3	15694.6	8417.36	13994.5	17513	15248.1	15582.7	23834.7	11454.9	13407.7	12353.2	13933.2	14169.7	40335	11386.9	10311.7	11482.9	16001.9	12008.6	17239.7	9908.21	15689.9	11516.8	13093.1	14110.1	14885.5	13108	13049	13904.9	19371	12868.6	13415.2	14037.1	13292	15110	17654.3	15268.7	14600.8	13558	20353.1	11906.2	14040	12998.1
O15091	O15091	MRPP3_HUMAN	PRORP	Mitochondrial ribonuclease P catalytic subunit						3352.62							2831.25		2834.08	11113								7063.18		7307.73	5111.42	3960.22				3047.28		2986.72	2057.99		5730.14			4459.05	6816.52	7401.04	4813.63
O15111	O15111	IKKA_HUMAN	CHUK	Inhibitor of nuclear factor kappa-B kinase subunit alpha						1975.83								3946.77			4020.09							4393.83	3573.32				3558.66								5729.22
O15116	O15116	LSM1_HUMAN	LSM1	U6 snRNA-associated Sm-like protein LSm1				16152.8		13526.7		15947	16806.9		14631.9	17335.5		13952.7	15439		14919	18802.2	15312	13235.4	16074.2		18674.7		15191.3	11942.3	12154.7		12699		15296	19865.3	18639.9	17924.5	23987.7	16088.2	13160	14090.7	12676.2		9524.63			11686.5	20880.8
O15118	O15118	NPC1_HUMAN	NPC1	NPC intracellular cholesterol transporter 1	20802.1	30380.1	19739.8	21528.1	18508.4	11840.7	12550.8	25280.2	24458.9	26654.3	22304.3	19977.1	12490.5	15857	17149.5		13806	25976.7	28738.5	25111.3	25277.9	24807.6	18196.6	18274.4	19402.7	18248.6	14941.4	18586.9	15346.2	26560.8	23597	18841.2	26470.8	25470.3	23721.7	23635.9	17079.3	16068.7	15260.4	15697.9	14558.2	28499.8	17801.5	26842.6	25654.6
O15121	O15121	DEGS1_HUMAN	DEGS1	Sphingolipid delta(4)-desaturase DES1		16262.1		14704.3							16098.8				10499.1			12667.5	16852.9		20196.2	15589.2	13682.8				11160.6					9533.55	17920.6	19217.8		16933.7	9260.53				9654.49		9890.3		13462.6
O15126	O15126	SCAM1_HUMAN	SCAMP1	Secretory carrier-associated membrane protein 1	8148.16	8868.29	8206.63	9760.69	54434.9	55921.2	43319	7317.86	11662.4	14817.6			43425	40137.3	53080.9	34898.1	52741.4	9215.27		16328.8		9217.92	4947.67	51270.9	43316.9	42108.7	69910.9	67115.1	56703.3	5938.96		39566.5	12160.6	12561.7	7294.58		38252.7	13462.4	48739.5	62307.3	43418.7	38473.7	51203.7	15594.2
O15127	O15127	SCAM2_HUMAN	SCAMP2	Secretory carrier-associated membrane protein 2
O15143	O15143	ARC1B_HUMAN	ARPC1B	Actin-related protein 2/3 complex subunit 1B	8910.81	9186.34	8047.99	5712.23		8105.8	10820	6199.62	11498.4	17245.5	7904.3		8035.08	5870.7	7162.94	28302.9	10670.2	7035.43	7255.5	5659.1	7715.21	9429.93	7658.78	7174.19	6750	4507.41	6494.2	6807.61	6376.76	11268.7	7492.67	10288.4	14692.4	7797.34	11123.8	9734.93	8020.7	11818	6620.32	8007.96	9855.15	16677	5843.42	6083.77	8838.19
O15144	O15144	ARPC2_HUMAN	ARPC2	Actin-related protein 2/3 complex subunit 2	62419.3	59994.1	58040.6	49570.3	59964.1	81468	97978.5	53263.5	64655.1	88400.5	58530.9	55939.6	82695.9	64485.7	69081.7	250733	87790.4	62862	55413	52166.2	58079.2	74568.4	64480.7	86539.1	71200	74446.9	97816.3	102236	86848.3	71883.6	64906.8	75361.8	82276.7	74678.7	91490	67829.8	84012.2	61917.4	89757.4	97562.8	105935	103934	96955.4	54435.3	74046.1
O15145	O15145	ARPC3_HUMAN	ARPC3	Actin-related protein 2/3 complex subunit 3	92026	93380.8	70423.6	83372.3	90781.3	103109	82413.4	67463.9	90759.8	74359.1	121950	87560.5	126891	139520	107737	208127	146950	100533	90030.7	78903.6	206316	68783.9	149840	84568.9	113628	149591	121040	95074.9	102338	85192.8	94602.5	96801.7	95955.1	92922.3	81881.9	107509	102432	78324.1	113627	132368	126932	59169	136835	78075.2	86554.8
O15155	O15155	BET1_HUMAN	BET1	BET1 homolog						4806.88	4669.34			3980.21			3488.97		4204.52	12488.5								4096.59			5004.8	4891.33	2781.67			4236.58	3867.34		3457.41				4351.47	5038.33			4661.95
O15160	O15160	RPAC1_HUMAN	POLR1C	DNA-directed RNA polymerases I and III subunit RPAC1	5302.24							5868.64						4076	4306.29		3658.42	6973.36		7302.97			6673.83		4283.97	4953.63			4413.46	6540.88	6859.95	4162.21		4218.05		4602.61								4556.22
O15173	O15173	PGRC2_HUMAN	PGRMC2	Membrane-associated progesterone receptor component 2	18813.5	21269	20725.8	25505.3	26316.4	19192.7		19141.5	21065.5		15772.2		27838.7	28865.2	14624.3		27586.2	20098.7	16996	32513.2	24510.3	22090.2	22996.9	17017.1	30374.6	26774.6	15190.4	19689.3	31477.6	21713.8	26680.4	31525.6	28269.8	22016.1	24757.1	22164.9	28720.9	19734.1	27850.9	26031.6	24709.8		24643.6	26475.1	28516.1
O15197	O15197	EPHB6_HUMAN	EPHB6	Ephrin type-B receptor 6					17229.2	12723.3							13555	19649.8	13253.5		19301.1			3276.97				15717.8	18163.4	17438.9	14791.4	18217.8	14820.3			5958.06	6384.34				15645.7		22096.1	15449.6	15247.6		14125.6	4662
O15211	O15211	RGL2_HUMAN	RGL2	Ral guanine nucleotide dissociation stimulator-like 2		5048.96	4350.36	3123.43		4410.98	5660.68	4004.34	3616.66	5692.26		3001.15	5795.46					4162.91		3767.9		4457.14	4118	4214.42		4322.84	3252.67			4243.82				3034.44	3221.73		5649.16	3874.13	3671.19	2803.05				4632.54	3215.54
O15212	O15212	PFD6_HUMAN	PFDN6	Prefoldin subunit 6	48748.7	46506	53992.9	45008	41924.7	52439.7	41888.1	63889.8	61970.5	59264.3	40500.1	55877	44232.7	47531.9	48884.8	74302.8	53061.8	50267.3	49274.5	48264.4	47442.5	45903.4	48059.2	42966.6	40842.4	50648.4	46822	45776.1	43078.3	46518.7	53949.4	46010	48337.2	60004.9	38955.7	54380.3	42166.3	45500.7	41870.7	45071.6	46609	38202.5	54786.6	44125.1	50208.2
O15228	O15228	GNPAT_HUMAN	GNPAT	Dihydroxyacetone phosphate acyltransferase		3604.91		5395.73		4674.36	4788.88		5753.21				4723.69	5116.41	3876.21	6879.52	3897.26			3787.48	2979.62	3659.09	5422.04	3616.44	6777.55	4782.93	4101.3	3276.59	5160.1	3631.19		4575.98	6318.41	4068.43	5052.49	5006.9	4762.49	4250.5	5035.31	4741.43	4898.27		4849.56	5519.5	4683.58
O15230	O15230	LAMA5_HUMAN	LAMA5	Laminin subunit alpha-5	22367.9	25187.9	22856.7	16136.2	35895.4	19335.1	26901.5	21603	27020.6	46178.1	13594.7	23153.9	22168.8	15585.9	19122.3	59603.9	25760.9	22312.8	24676.4	23550.6	19397.5	34653.4	17409.8	27860.2	20389.3	20547.3	22025.9	21596.4	22077.4	25604.1	24773.7	26561.8	20150.7	20431.6	24407	20233.1	27987.6	26868.2	19008.9	18450.9	19597.1	62433	19484.5	29431.6	25730.8
O15239	O15239	NDUA1_HUMAN	NDUFA1	NADH dehydrogenase [ubiquinone] 1 alpha subcomplex subunit 1
O15240	O15240	VGF_HUMAN	VGF	Neurosecretory protein VGF	28994.9	11861.4	19520.6		36779.3	56793.6	39367.2	14000	10011.2	22338.7	16666		74713.3	75739.2	60590.5	67769.9	73607.1	11533.8	18513.5	38541.8	40949.1	29299.5	12227.3	36900.2	80784.1	62443.7	139445	100839	78415.1	34407	29484.7	54937.2	35371	28303	33089.7	31012.8	77623.9	49266.6	55984.6	107816	79480.2	43652.5	83123.8	18562.4	32930.2
O15254	O15254	ACOX3_HUMAN	ACOX3	Peroxisomal acyl-coenzyme A oxidase 3			4303.79		4199.11	6662.83	4712.56		5270.08	5541.32	3059.89		3717.24	4004.99	6205.8		3838.71	2640.23	3755.67	3917.84	2282			5831.7	5482.79	3406.95	5075.44	5640.77	5685.61		4580.75	2196.47	4203.41		3567.26		4666.18	4556.83	2966.42	3630.63	3341.08	5264.34	4398.79
O15258	O15258	RER1_HUMAN	RER1	Protein RER1	7064.62	7649.58		6308.33	8192.51	10704.2	11685.1	7853.97		18976.8	9177.33		8900.95	7889.7	15233.9	26421.8	6513.63	8599.87	7232.34	8962.89	6194.23	8365.76	3827.68	12251.1	9969.56	7486.76	12145.8	13065.6	11125.4	8269.11	7699.1	11011.1	11842.6	6543.88	10454.1		9270.53	16421	9325.22	15576.1	8936.38	19469.4	10285.3	7132.88	6370.9
O15260	O15260	SURF4_HUMAN	SURF4	Surfeit locus protein 4	30444.5	28232.2					22449.7	23064							25229.8							31017.3		32828.9			29190.7		43594.8			29011.8	33639.8					24098.3	32557.4	27313.9	22777.4				36238.2
O15269	O15269	SPTC1_HUMAN	SPTLC1	Serine palmitoyltransferase 1	19845.9	16986.5	18465.8	14737.9	15210.6	13974.1	15126.7	10928.4	21442.9	30181.3	11289.2	14240.4	15212.3	12405.3	12054	17324.6	11787.5	16351.4	15147	15927.6	15837.6	22027.1	11936.2	14569	12812.8	11128.4	14835.4	21469.1	13302.7	19949.5	16557.9	15951.5	25389	16379.6	20160.3	16245.6	12802.7	20960.1	11741.1	14750.6	15259.2		10455.1	12134.2	17302.4
O15270	O15270	SPTC2_HUMAN	SPTLC2	Serine palmitoyltransferase 2	9828.1	8298.06	7391.91	8595.7				5982.03			6616.48	7705.06	3510.47	4084.86	3276.14			5104.17	5165.36	7018.91	7729.82	6401.48	7411.14			4085.22				5886.45	8219.42	4816.51	9126.61	7356.3	7655.42	8099.8		7211.15	4397.96	3689.53			4195.33	8315.65	7338.78
O15294	O15294	OGT1_HUMAN	OGT	UDP-N-acetylglucosamine--peptide N-acetylglucosaminyltransferase 110 kDa subunit	22966.5	22182.1	23376.5	22763.2	34293.2	19170.6	29058.8	24090.9	23784	53504.4	25529.1	22712.7	36409.4	34676.6	29759.2	57946	28372	23995.8	20302.3	23061.2	26409	21262.5	23388	36917.8	31677	34685.5	38179.3	37416.6	35293.9	20474.2	23815.1	26841	26602.4	24775.6	22451.9	23055.2	35126.4	21664.4	38821.5	38995.1	37737.6	49390.6	37519.4	22294.6	24515.6
O15305	O15305	PMM2_HUMAN	PMM2	Phosphomannomutase 2		11665.1	13045.7		9673.91	10296.5	9953.05	13191.9	12842.2			12339.8	12378.7	9682.61	6874.46		12547.3	7604.03						10246.8	10827	11425.6	10699.7	12198.8	11663.4		14113.5			13999.3		9521.23	9160.56		11881	9440.72	12494.9		11993.3		13039.9
O15318	O15318	RPC7_HUMAN	POLR3G	DNA-directed RNA polymerase III subunit RPC7
O15327	O15327	INP4B_HUMAN	INPP4B	Inositol polyphosphate 4-phosphatase type II					7449.32	8748.51	7525.98			5845.37			6012.83	6010.48	7066.26	30372.3	5217.57	2974.19		5264.49				7977.08	6636.53	6806.81	7311.28	8543.87	6627.69			4862.14	2874.08	2650.25			6017.39		7407.88	7822.67	8157.48	10297.9	6557.36	4793.19
O15354	O15354	GPR37_HUMAN	GPR37	Prosaposin receptor GPR37														7395.81							11898.9		9850.1
O15357	O15357	SHIP2_HUMAN	INPPL1	Phosphatidylinositol 3,4,5-trisphosphate 5-phosphatase 2			3841.9						3621.26				3509.95	1761.95						3477.88				4161.12		3054.53		3615.37			2933.78	2378.31	4069.05				1992.55			4421.63	4701.13			3765.94
O15371	O15371	EIF3D_HUMAN	EIF3D	Eukaryotic translation initiation factor 3 subunit D	12436.1	14690.3	14842.6	11866.6	12833.2	13377.7	13138.9	15105.4	12442.1	20765.4	12966.3	10944.4	12871.6	12494.2	19448.1	25175.2	9499.38	13385.6	14447.9	11688.9	14280.7	10377.4	13538.5	12324.6	11908.7	12040	10346.9	11066.8	12321.7	9887.23	14165.4	15380.4	15613.7	13768.7	15340.5	12231.7	16243	18684	14489.6	13140.7	13809.2	35213.1	12758.5	11706.1	12270.1
O15372	O15372	EIF3H_HUMAN	EIF3H	Eukaryotic translation initiation factor 3 subunit H	8529.96	6926.63	8506.65	8153.83	7496.18	7534.92	7423.86	8363.8	6720.6	14491.4	6088.26	9621.15	5533.56	6332.05	7292.06		5860.31	6886.79	9136.64	7599.79	7601.9	6939.76	6625.14	7697.54	8155.7	6860	5990.22	6106.5	8835.02	7362.88	8815.19	8400.03	7235.81	7610.5	7358.19	8490.68	6489.17	12109.9	7539.95	6539.55	5337.79	11708.2	6534.14	7198.05	7627.72
O15382	O15382	BCAT2_HUMAN	BCAT2	Branched-chain-amino-acid aminotransferase, mitochondrial	5113.18		8485.88			8409.99	9067.48	3079.57		10079.5		6373.6	5388.56	6813.91	8333.46	12213.8			4878.89	8139.31	7998.92	9657.93		9233.06		7326.14	10985.4	11696.3	9962.83	9246.23	6199.43	9218.55	8793.71	10450	8564.21	10153.7	8072.12	6265.17	7008.87	9089	8923.14		9559.63	5190.94	9792.87
O15391;P25490;Q96MM3	P25490;O15391;Q96MM3	TYY1_HUMAN;TYY2_HUMAN;ZFP42_HUMAN	YY1;YY2;ZFP42	Transcription factor YY2
O15394	O15394	NCAM2_HUMAN	NCAM2	Neural cell adhesion molecule 2	45152.7	45627.2	39645.6	49770.8	51922.8	49622.9	47346.1	51706.5	49463.1	58141.1	61570.1	47448	59590.4	77792.1	62424.9	40594.8	73194.6	64670	62035.5	68102.7	68802.4	48936.6	68025.3	46211.4	69955.8	60972.1	53128.7	51649.6	67191.7	50109.8	46479.6	122501	59546.3	44048.1	47471	67822.3	65425.4	40801.9	73098.3	63884.4	63551.8	55568.9	80976.7	78642.5	60196.3
O15400	O15400	STX7_HUMAN	STX7	Syntaxin-7	69115.7	82622.9	72400	94091.4	130825	125264	78027.4	80378.2	80126.3	31436.9	76278.2	74193.6	116523	112945	112018	46041.5	123082	85249.4	67037.7	90036.8	70510.9	92040.6	66302.5	109764	111429	100054	127938	146310	113503	67368.3	68205.1	91694.4	91911.1	85411.6	79349.3	80034.6	83334.4	47396.7	114107	116031	94168.7	35810.5	115225	80336	82921.5
O15439	O15439	MRP4_HUMAN	ABCC4	ATP-binding cassette sub-family C member 4	26907.8	20305.3	26670.1	16821.1	10399.3	11710.8	13737	17629.9	17784.2	19752.2	13058.1	25673.9	16769.1	7883.09	11413.3		15589.6	24201.6	17329.5	24275.1	10886.8	19505.2	10497.3	12174.1	15137.5	12073.3	10210.5	7210.62	10032.4	20813.8	21143.3	13262.2	21133.3	13868.1	16893.3	14651	9993.08	19262.7	5764.16	8191.5	10895.8			8884.74	15986.6
O15484	O15484	CAN5_HUMAN	CAPN5	Calpain-5	24251.8	22848.9	29980.4		23530.1	27744.4	26759.8	27323.3	22720.5	24917.8	22819.2	18230.6	31664	19960.6	24124.7	63669.3	25446.8	19051.8	24460.6	22752.4	19283.2	21269.9	23195.3	28493.6	26248.8	21923.4	23657.4	17737.9	24315.6	20217.6	24043.1	35390.5	16634.5	16579.6	28425.4	19130.7	29171.5	38857.8	19957	23812.7	33348.1	38752.8	23544.2	20524.9	22661.1
O15488	O15488	GLYG2_HUMAN	GYG2	Glycogenin-2	9011.88	8519.62	4617.63	10116.1		4884.27	8443.74	6447.64	6449.81		6636.85	10356.4	8189.63	4055.25		27788.1	6917.63		3827.76	7376.65	9316.57	6696.65	8650.07	4523.66	4612.11	5188.88	5780.6	4489.28	6232.2	6585.27	7218.94	7217.61	7326.64	6387.43	7717.2	11024.3	4112.34	7669.88	4827.28	6822.3	9587.87	10298.9	5744.4	7157.66	9327.9
O15498	O15498	YKT6_HUMAN	YKT6	Synaptobrevin homolog YKT6	58741.6	57056.7	57502.2	58460.7	52911.9	60983.7	62955.3	51902.1	60992.9	45560.5	65181.1	68139.2	74154.6	71754.6	59621.1	23277.2	67196.5	74870.8	69791.1	64886.4	67916.3	65491.4	66871.4	71777.1	73518.9	63325.5	63970.1	66674.8	68237	58059.6	51404.5	71557.8	66708.1	68783.1	75107.3	70701	67955.7	47398.7	73418.9	71069.8	68421.1	54698.4	74559.3	57457.3	73624.2
O15511	O15511	ARPC5_HUMAN	ARPC5	Actin-related protein 2/3 complex subunit 5	52357.1	46490.5	66334.1	57861.7	54701.3	51073.9	39202	64071.4	60858.5	18781	40280.6	59853.9	65814.2	66616.5	37884.5		71778.3	55742.8	37118.3	39537.6	31075	39638.5	34498.6	45082.5	55428.7	38668.2	47307.1	38083.5	56008.5	63594	49390.7	43960.7	67555.2	56010.6	50790.7	61468.2	42691.4	34765.5	47196.4	43989.8	39793.9	15668.9	47155.4	41543	61763.9
O15523	O15523	DDX3Y_HUMAN	DDX3Y	ATP-dependent RNA helicase DDX3Y
O15530	O15530	PDPK1_HUMAN	PDPK1	3-phosphoinositide-dependent protein kinase 1	20907.2	20900.8	17169.2	17858.4	24054.6	25626.4	20830.4	15484.5	19130	20512.2	14910.5	15046.7	21143.8	21988.6	22967	28502.9	22237.4	15479.4	17249.2	16716.1	15336.2	21779.4	12733.7	20307.5	23226.9	20093.6	25076.7	27454.8	19590.4	18624.5	15587.6	17445.1	17139.2	21013	18968.9	18090.1	22000.1	15802.5	27154.5	22900.6	24944.2	23124.8	22752.7	13253.1	18677.7
O15533	O15533	TPSN_HUMAN	TAPBP	Tapasin						5326.9	6900.58	7668.82						10127.7			8963.88							15062.2	9641.91	12835													8124.74	8269.33
O15540	O15540	FABP7_HUMAN	FABP7	Fatty acid-binding protein, brain	37587.4	38889.3	53825.9	37871.3	24321.3	33399	46152.4	40149.7	51384.4	34808.3	42782.1	35094.7	33815.3	27732.8	34858.3	61516.3	23583.5	44281	50014	26443.7	42219.2	40727.2	41588.3	35847.6	30286.1	25846.2	23883.9	26299.2	31413.1	38413.6	45984.4	39450.9	33544.7	36100.8	58117.6	52495.3	25517.2	61843.2	22454	29944.6	39403.4	31143.3	24628.5	37338.6	34491
O43143	O60231;O43143;Q14562	DHX15_HUMAN	DHX15	ATP-dependent RNA helicase DHX15	32109	28255.7	23137.8	26354.3	22633	22043.5	19498.5	29985.9	24766.5	25464.7	22087.5	25135.1	21661	21571	21826.1	32542	20063.2	25026	21382	25187.3	23495.2	21729.4	22101.2	21835.7	19915.3	18700.4	17088.3	17957.9	22388.2	25223.1	31219.2	23995.5	29985.5	22292.3	26311.4	22994	17094.7	43466.7	20115.5	19734.7	17672.5	34127.6	18464.5	23835.5	24667.1
O43147	O43147	SGSM2_HUMAN	SGSM2	Small G protein signaling modulator 2
O43148	O43148	MCES_HUMAN	RNMT	mRNA cap guanine-N7 methyltransferase	6607.32	5209.12	6262.57		5620.52	7860.74	7685.88		6271.44	8295.42	4942.7	6403.67	5854.57	6965.53	8615.96		3996.7			5909.32				7134.67	5565.78	5234.03	6052.6	7977.9	7050.49	5374.78	8259.85	7023.3	5919.86	4741.63		4501.87	5581.86	20370.1	6624.76	6026.36	4634.87	8463.12	7358.52	6338.09
O43149	O43149	ZZEF1_HUMAN	ZZEF1	Zinc finger ZZ-type and EF-hand domain-containing protein 1	14964.5	15682.3	14060.7	13885.8	9573.18	12639.3	11243.3	12349.3	15018.8	18733.8	12886.1	14030.3	11246	12080.4	12500	27891.3	11176.3	13233.7	15500	15362.6	9611.71	14481.6	10596.6	13420.4	10003.5	12949	10303	11763.1	10558.5	13915.4	14832.3	12318.8	12624.5	12962.3	10959.4	12736.2	12012.6	16797.3	12559.9	10877.5	11684.1	18948.7	10949	11394.4	13162
O43150	O43150	ASAP2_HUMAN	ASAP2	Arf-GAP with SH3 domain, ANK repeat and PH domain-containing protein 2	6831.33	5743.57	5028.02		3657.39	5762.14		4851.17		5712.2			5393.03	5403.34	3817.86	8655.33	5377.77	3569.71	2977.79	3573.93	2691.47		3649.32	5074.57	5716.6	4149.05	5888.39	5954.25	5980.1	3278.43	3558.19	4087.07	4449.68	3808.43	3616	2837.18	4630.56	3725.35	5311.22	5672.6	3698.88		5085.54	3981.87	3033.25
O43157	O43157	PLXB1_HUMAN	PLXNB1	Plexin-B1	25206.2	24117.8	25287.9	25023.4	30374.8	28010	29422.4	32262.9	28412.2	30271.3	30243	28342.6	33733.7	25873.5	28506.9	76228.3	24687.7	25417.4	21193.1	30036.4	21326.1	25882.9	27660.3	23037	25907.8	25579.4	24147.9	23934.3	27013.2	23624.5	27730.4	30430.5	27409	24359	31196.3	27239.5	24089.3	27509.4	24423.7	24275.5	29153.8	41489.1	21385.5	26985	31789.3
O43164	O43164	PJA2_HUMAN	PJA2	E3 ubiquitin-protein ligase Praja-2					2501.59	1983.28							1784.47		1611.47									3434.89				2899.31	2074.38								2901.77	2737.36	1716.07	2390.77
O43166	O43166	SI1L1_HUMAN	SIPA1L1	Signal-induced proliferation-associated 1-like protein 1													7776.28	5021.27											4518.92	4413.69						7080.06							5799.46	5140.48	3460.15	11429.9	5439.68
O43169	O43169	CYB5B_HUMAN	CYB5B	Cytochrome b5 type B	45101.4	56617.7	48949.7	42421.9	53998.3	76716.1	68039.5	44396.2	61883.5	91882	35381.6	38275.9	54913.8	83242.3	99280	111210	83998.4	52627.7	43938.7	56379.3	65484	72490.8	45505.2	97760.8	90496.5	69756.7	113717	105622	105791	47177.6	41313.8	78200.1	80148.8	71824	80467.1	61349.6	71968.9	60948.8	78360.6	108965	108667	98582.6	114065	62011.1	60579.5
O43172	O43172	PRP4_HUMAN	PRPF4	U4/U6 small nuclear ribonucleoprotein Prp4
O43173	O43173	SIA8C_HUMAN	ST8SIA3	Alpha-N-acetylneuraminate alpha-2,8-sialyltransferase ST8SIA3
O43175	O43175	SERA_HUMAN	PHGDH	D-3-phosphoglycerate dehydrogenase	461843	586359	641474	653650	624102	393041	422895	756806	423430	430046	755620	624946	578178	314999	493899	416885	504472	680547	510304	578236	630102	555588	629611	316268	543192	459121	419145	389638	449981	433822	700470	581780	660667	516265	808819	723087	336797	569949	321110	373509	453019	369345	345097	642793	705673
O43181	O43181	NDUS4_HUMAN	NDUFS4	NADH dehydrogenase [ubiquinone] iron-sulfur protein 4, mitochondrial	34219.5	31058.2			58029.9	90795.4	62573.5	32949.7	45285.9		39519.1		38880.8	57899.1	101412	93941.1	62745.4	39233.9	35700.4	35039.8	48255.7	46135.9	28835.1	60810.1	58840.5	50082.8	107668	100869	71728	28878.8	45851	64222.9	42746	36294.3		37966.1	60256.8	68619.1	64583.8	69000.5	59457.3		110676	49066.7	26597.3
O43236	O43236	SEPT4_HUMAN	SEPTIN4	Septin-4	265422	280595	260076	221677	125697	92577.9	123622	240773	262296	281691	292730	180791	72741.3	104522	103772	193618	86902.7	304883	191709	179846	235582	215546	222655	119192	100501	125396	80130.3	93759.8	94439.1	223005	254834	131312	254479	252857	294366	218359	101176	172203	85132.4	99800.8	105445	119826	103601	157444	193070
O43237	O43237	DC1L2_HUMAN	DYNC1LI2	Cytoplasmic dynein 1 light intermediate chain 2	86407.8	84276.8	72034.1	72539.8	47495.2	48339.9	61590.3	86248.1	77971.9	96355.5	78328.1	67100.7	44577.4	51717.2	62014.4	112848	62154.3	66141.3	70181	56419.7	75012.6	89896.7	57699.1	53348.2	51233.7	43589.6	57063.1	56101.7	51757.8	73919	69863.3	50753.7	82616.2	95975.9	97098.1	68666.9	40446.4	45297.5	49986.2	53972.8	52217.3	79475.5	53739.6	53762.8	74327.8
O43240	O43240	KLK10_HUMAN	KLK10	Kallikrein-10																																										16003.8
O43242	O43242	PSMD3_HUMAN	PSMD3	26S proteasome non-ATPase regulatory subunit 3	40208	38503.3	36638	39947.2	32582.6	41901.6	37451	36239.2	41698.5	47927.3	32774.1	32585.8	39135.3	40369.7	38657.8	62569.2	37614.6	37682.1	38520.3	40518.4	42291.8	42471.3	44251.3	46054.6	36588	43567.4	45515.9	43349.8	43781.7	41633.5	37798.9	45160.3	45159.2	41969.9	42514.2	41583.7	42576.4	37567	43350	43381.6	46313.5	50278.6	46332.4	38212.6	42224.1
O43251;Q9NWB1	O43251;Q9NWB1	RFOX1_HUMAN;RFOX2_HUMAN	RBFOX1;RBFOX2	RNA binding protein fox-1 homolog 2
O43252	O43252	PAPS1_HUMAN	PAPSS1	Bifunctional 3'-phosphoadenosine 5'-phosphosulfate synthase 1	9928.19	9770.29	8544.31	9176.28				9554.09	7920.44	10587.8	7442.93	7373.81	3642	3926.19	5162.8		3281.6	8473.89	7624.36	7652.97	7297.98	9673.64	6044.58	4033.85		3814.35	3656.77	4523.12		8626.5	8307.44	4317.93	8010.05	8050.5	9424.64	7395.22		7234.91			2551.24		3787.05	5497.34	9381.24
O43264	O43264	ZW10_HUMAN	ZW10	Centromere/kinetochore protein zw10 homolog	11553.5	10607.8	12814.6	11865.8	11147	12400.8	10957.5	13216.4	11156.5	25991.2	13005.1	10900.5	10509	9073.15	13212.3	39128.2	7734.74	8600.26	11719.7	11027.7	9025.51	9638.78	6651.6	12675.3	8178.93	14145.9	10078.6	11189.3	11313.3	10564.9	11539.3	8846.98	9338.55	9953.15	8750.08	8783.07	9453.91	11072.2	9637.46	11373.3	10453.3	20160.7	11915.9	9829.78	9359.06
O43272	A0AAG2SXN7;O43272	PROD_HUMAN	PRODH	Proline dehydrogenase 1, mitochondrial	15693.5	29214.6	13515.3	13107.8	59961.8	19134.6	19966.1	24423.3	20999.1	16606.3	16232.8	25610.6	41297.8	28897.1	25714.7	19301.3	36133.8	24165.9	35229.1	41999.8	23376.5	32420.2	23017.6	33262.7	58867.3	46627.1	39406.9	37483.4	38349	26604.3	31399.9	42379.4	20999.6	15587.2	21949.4	26615.1	43414.8	38349.5	34710.4	33617.8	34831.6	22506.9	34724.1	50729.6	7012.97
O43281	O43281	EFS_HUMAN	EFS	Embryonal Fyn-associated substrate		11937.2							11840.8		21619.2							25773.2		13895.3			17402										19838.7	18744.1		18584.9
O43290	O43290	SNUT1_HUMAN	SART1	U4/U6.U5 tri-snRNP-associated protein 1		1574.54				1344.73	1338.82			4328.77			959.444		1202.21									783.807								1388.16	1854.34						442.673	912.053
O43291	O43291	SPIT2_HUMAN	SPINT2	Kunitz-type protease inhibitor 2
O43292	O43292	GPAA1_HUMAN	GPAA1	Glycosylphosphatidylinositol anchor attachment 1 protein	12347.4	10224.7	12742.3	10672.8	13389.5	16245.2	13550.3	9576.74	11705		11637.1	9589.27	13294.8	11933.8	13070.1	15955.9	10846.1	11589.3	8097.09	12351.2	10088.8	9908.42	7174.55	18240.8	11012	14293.9	12754.4	14708.7	13797.5	9945.82	14212.5	15585	16575.4	12136.4	15881	12525	14785.6	16145	15807.3	15969.2	16569.4	16960.7	14629.9	10728.3	13302.5
O43293	O43293	DAPK3_HUMAN	DAPK3	Death-associated protein kinase 3
O43294	O43294	TGFI1_HUMAN	TGFB1I1	Transforming growth factor beta-1-induced transcript 1 protein	9140.19	8644.92		8231.52			7822.48	11849.2				9234.41	10683.7	7221.29	7666.3		9083.05			8867.93		11559.5		8625.1	9117.82	9392.14		5047.04	11390	8445.55	11162.2	9498.63		8461.01			9822.46		7483.87	8619.2			6149.44	14191.2
O43295	O43295	SRGP3_HUMAN	SRGAP3	SLIT-ROBO Rho GTPase-activating protein 3	20681.8	21795	22857.8	22690	20365.5	24643.8	20280.2	20270.5	23098.2	36412.5	15842.4	20504.3	19387.8	20681	25233.3	34924.3	21385.7	16128.6	14510.6	26259	16090.8	22964.9	14892.6	20256.4	20084.5	20502.4	24549.8	23622.6	24355.7	18694.4	19644.3	31954.9	17591.4	21451.8	19436.2	17481.2	18226.8	20735.8	20995.1	23035.6	20933.4	28253.5	20094.6	25366.1	21664.1
O43301	O43301	HS12A_HUMAN	HSPA12A	Heat shock 70 kDa protein 12A	535778	569784	575475	505159	357818	301020	287078	502687	553988	620573	451751	521054	246604	329150	315896	471638	265055	425639	443246	367591	434071	616860	454313	330291	291800	310763	315413	313022	301029	572719	496457	384095	544887	637909	523385	575955	327911	364559	319791	327622	314730	390706	340082	439425	607296
O43307	O43307	ARHG9_HUMAN	ARHGEF9	Rho guanine nucleotide exchange factor 9
O43310	O43310	CTIF_HUMAN	CTIF	CBP80/20-dependent translation initiation factor		8331.65			10122.1	9395.33	5146.98		7362.48		5306.52	7866.07	5490.02	8483.53	11731.8		6875.79	7651.75						11134.8	6591.34		11236.6	9862.03	12083.4			7546.84		7050.4	8398.86		5996.13	11237.9	8254.08	8649.34	4674.4		8733.25	6902.58
O43314	O43314	VIP2_HUMAN	PPIP5K2	Inositol hexakisphosphate and diphosphoinositol-pentakisphosphate kinase 2	10939.5	8792.84	9923.99	10623.1	8025.63	8399.71	6238.06	7698.84	8953.96	11463.5	7653.49	11621.9	5900.42	6625.72	6549.29		4381.8	7906.54	12464.3	9108.72	9848.02	10651.3	8070.06	8363.61	6595.11	6607.46	6989.65	8253.43	6243.61	11645.2	9031.76	6834.56	8735.41	10105.7	7434.79	9870.74	5710.99	6433.41	5766.98	9254.16	6408.99		6731.5	7213.41	10293.9
O43318	O43318	M3K7_HUMAN	MAP3K7	Mitogen-activated protein kinase kinase kinase 7	7374.27	6132.22	5964.7	7219.17	4474.24	5440.54	6285.02	5190.08	6610.23	8499.84	3220.06	6614.48	4384.59	4565.34	4232.41	8697.69	4061.31	3471.34	4604.71	5164.08	3481.95	8513.02	4787.85	6139.08	4206.28	4024.95	6849.64	5641.41	4974.91	4774.45	5221.4	4894.98	4438.11	6631.31	5908.77	5733.35	3666.24	6651.7	5951.48	6487.15	6085.9		4788.92	6352.6	5006.2
O43324	O43324	MCA3_HUMAN	EEF1E1	Eukaryotic translation elongation factor 1 epsilon-1	28795	24116.8	25767.5	27906.7	51367.6	60857.3	39264.8	29206.3	32867.8	25538.6	24969.8	28932.3	46638.5	51011.8	60645.1	51823.9	33642.7	27102.6	28619.2	38771.8	29258.7	27471.9	24787.5	70857.4	39786.5	47399.2	43605.3	60725	56289.4	34338.9	32988.5	44198.1	26878.2	27021.9	29030.1	30263.1	52263	59696.5	53799.7	55332.2	41088.5	33233.1	57214.1	34366.6	29137.1
O43325	O43325	LYRM1_HUMAN	LYRM1	LYR motif-containing protein 1	9816.76	6741.92	7300.57	8180.08	18524.3	12341.7	12475.5	12049.1	9994.28		7932.1		15226.4	13099.7	14519.6		10664.4	7661.22		10511.7		8852.29		11936.2	14682.6	8024.96	12628.6	14616.5	11579.2	6946.22	11537.2	18440.9	10583.7	7443.53	7602.83	8047.2	20392.8	22191.3	14019	16443.4	12892.4		15103.9	19891.5	10148.6
O43390	O43390	HNRPR_HUMAN	HNRNPR	Heterogeneous nuclear ribonucleoprotein R	105693	94713.3	97411.5	87913.7	71781.9	70241.1	55935.5	105005	79644.6	123136	99317.1	79368.1	67723.7	54140.8	66626.6	94519.8	62550.9	83700	74831.4	83852.2	80046.5	84716.3	74554.9	62935.4	48558.6	56494	50254.2	55192	55399.9	79773.8	100208	81796.9	74293.2	79419.5	79447.1	79683.9	55670.1	102586	55935.6	63771.8	60934.3	39897.8	64428.5	76870.5	67034.1
O43396	O43396	TXNL1_HUMAN	TXNL1	Thioredoxin-like protein 1	119679	122341	114334	125949	106710	83234.7	49057	163909	115558	38302.8	138875	97113	91077.6	91563.4	90846.4	21687.2	82113.7	120688	144579	106613	152172	91497.8	160235	68896.9	71627	89583.6	62427.4	59004.7	81579.8	126177	136962	76687.7	120889	125571	98873.9	158731	80435.1	90670.4	77544.7	78560.3	73494.5	14201.8	71984.6	124401	129987
O43399	O43399	TPD54_HUMAN	TPD52L2	Tumor protein D54	81829.8	77607.5	79166.7	75957.3	69095.1	74456.2	73761.3	81720.6	87380.3	65966.2	59697.4	88489	63110.8	69859.9	66633.6	102279	80411.9	97196.8	64860.8	62761.9	51027.3	60326.9	58188.9	80682.7	78901.8	57633.2	82135.2	52169	70854.2	66350.5	69178.6	62094.4	67899.3	74676.5	70280	61796.5	53641.5	62903.9	58125.8	65296.4	63767	62285.4	58367.9	58468.9	66238
O43402	O43402	EMC8_HUMAN	EMC8	ER membrane protein complex subunit 8					9021.14		7187.28						7146.22	7570.08	7546.91		8378.81	7792.64			10018.9			6069.45	7849.13	7469.47	6431.78	7066.85	8913.05			7977.39	5856.65		4559.09		8363.66		7733.31	6414	6700.27		7752.41	6141.62
O43405	O43405	COCH_HUMAN	COCH	Cochlin					18573.7	35157.3	28378.1			9505.27			42522.7	44174.7	32496.8	23865.2	92779.2							20432.2	42165.1	23299.8	51713.1	25957	60725.6			3516.82					37637.6		46947.5	38434.9	39471.1	22254.3	41769.5
O43414	O43414	ERI3_HUMAN	ERI3	ERI1 exoribonuclease 3					27222.6			34894.9	15807.9		49248.5		20515.9					44931.2			57639		34736.6			23834.3						32402.4	23012.1				27134.2		27368.3	25206	18370.3
O43426	O43426	SYNJ1_HUMAN	SYNJ1	Synaptojanin-1	119606	130465	114796	120557	120818	124198	116600	111378	119753	118299	128327	107980	125819	119401	119297	173509	125875	113252	104901	102182	128123	138444	147185	115450	122787	119614	136500	134706	113547	137711	120489	136339	132603	149453	128114	137973	119820	93007	138634	136400	132808	128624	130209	107186	131368
O43427	O43427	FIBP_HUMAN	FIBP	Acidic fibroblast growth factor intracellular-binding protein	22512.5	19860.9	22695.1	22587.4	15838.7	34508.9	24863.1	19015.5	25324.9	31127.5	19488.3	21190.9	29145	26440	28745.6	78479.2	22523.7	21426.6	22897.1	31375.3	22404	22401.4	23363.8	30181.8	20874.3	29846.3	31693.7	37869.8	22687.1	25177.6	24976.6	36749.2	26414	23966.7	25677.6	20007.8	33853.1	31744.1	37167.6	39858.7	28643.9	37353.5	36680.7	20771.9	22931.7
O43432	O43432	IF4G3_HUMAN	EIF4G3	Eukaryotic translation initiation factor 4 gamma 3	17970.9	15342.7	14670.6	16303.9	15755.4	19008.3	14578.4	16814.1	15256.3	22843.9	14269.6	14863.5	17141	16663.8	18745.4	36202.7	13013.6	14895.4	15822.5	17457.6	14826.1	15126.6	15997.3	19332.1	13615.9	16141.2	15839.9	18762.7	21690.3	18367.5	16687.5	17319.3	15943	14227.8	12981.1	16238.8	15529.2	27713.6	20223.1	19265	13650.9	25680.7	16028.5	15283.8	15320.3
O43447	O43447	PPIH_HUMAN	PPIH	Peptidyl-prolyl cis-trans isomerase H	19516.7	22757.4	22795.8	24366.9	17330.8	19543.8	16731.8	18724.7	23320.1	19976	16305.9	20903	20720	19273.6	17426.8	14562.2	22074.1	23957	21149.2	19414.4	20196.5	22523.8	20931.2	18881.2	23678.8	19187	19060.7	21242.7	19953.4	28374.1	21870.7	16732.3	18507.8	17893	19950.6	18234.2	26311.3	18770.9	17984.3	18413.7	14764.9		18355.8	18665.6	18193.1
O43464	O43464	HTRA2_HUMAN	HTRA2	Serine protease HTRA2, mitochondrial	16012	15410.4	16670.4	16906	27541.1	23516.4	16334.3	16688.8	16362.2	20529	16516.3	14236	26776.2	22142.9	20704.6	25287.6	23593.1	17413.1	16348	29176.2	13417.4	14887.7	13601.7	21996.2	19000.5	26616.3	18765	21085.7	28422	15739	19805.2	31312.8	14453.1	14243.6	14231.9	15540.4	30017	33018.4	23374.6	24617.7	27120.1	20625.2	20589.7	31722.2	17939.1
O43488	Q8NHP1;O43488	ARK72_HUMAN	AKR7A2	Aflatoxin B1 aldehyde reductase member 2	305893	256841	259732	235250	252854	263730	284492	280689	279711	408005	300545	255215	284749	182038	240687	486547	222320	261306	252050	264944	246369	245631	214990	237860	250930	185796	236585	218086	208760	220742	289388	274823	272814	247493	288805	266098	194972	318496	213576	225615	258063	241579	215727	260086	258996
O43491	O43491	E41L2_HUMAN	EPB41L2	Band 4.1-like protein 2	404153	446236	464408	388168	166648	167207	178314	345504	377189	390334	316257	346272	198011	132182	153022	345697	134691	333252	308592	232447	378711	427330	288513	160453	112381	162870	112126	105512	110219	387454	336322	153873	363764	441221	483333	368609	133736	179822	113371	133738	177620	151967	142551	210616	421839
O43493	O43493	TGON2_HUMAN	TGOLN2	Trans-Golgi network integral membrane protein 2	2721.54		2543.29	2073.28	3093.22	3591.17	3817.85	2355.15	3057.23	3841.68			3223.61	2264.36	2913.38	10471.1	3334.51	2752.02		2481.53				2997.47	2200.16	2640.87	2151.04	2384.05	3478.75	2666.71	2624.58	2385.9	3426.18	2196.57		2272.86	2344.23	4610.57	2137.38	3047.56	2637.05		2069.3
O43504	O43504	LTOR5_HUMAN	LAMTOR5	Ragulator complex protein LAMTOR5	2906.03	3358.77			2148.87	5765.85	4834.02			2993.91			3431.95	2022.01	5988.59									3793.84	2297.45	1643.76	5364.49	6053.95				3490.28	4310.33	3045.25			3252.77		5670.51	5171.76	4128.42		5015.61		3413.7
O43505	O43505	B4GA1_HUMAN	B4GAT1	Beta-1,4-glucuronyltransferase 1		10583.5		13386.5	30761.6	21303.2	12507.1	13192.4			17640.5	15688.4	25366.8	30197.2	29709.9		30345.9	16695.1	18044.5	21700.8	17929.3	15724.4	18470.5	14297.9	35932.2	29549.3	22044.3	25220.5	24676.3	8713.97	16585.1	34237.7	11154.3	10722.2	17916.7	10654.8	32511.7	17531	28194	28298.5	25870.6		26450.7	17270.8	12600.6
O43516	O43516	WIPF1_HUMAN	WIPF1	WAS/WASL-interacting protein family member 1	8102.71	12478.4	14002.2	11899.1	5860.11			10774.9	5908.5		12227.3	7224.71	4979.12	4946.37	3886.3		5124.23	15200.9	8848.82	6270.26	10269.5	9637.29	12460.3		4902.14	3416.18			3548.95	10662.7	11088.5		7739.05	12305.7	5980.47	12383.9	4682.63						3637.92	9422.08	10407
O43525	O43525	KCNQ3_HUMAN	KCNQ3	Potassium voltage-gated channel subfamily KQT member 3
O43526	O43526	KCNQ2_HUMAN	KCNQ2	Potassium voltage-gated channel subfamily KQT member 2	7979.96	8396.89	7773.45	9454.8	11788.2	17726	11980.6	9291.86	7959.09	18938	8314.9	7801.78	15471.3	16883.6	20120.4	17972.6	12899.6	9426.03	8662.54	8855.03	9548.56	9257.37	10859.2	13554.1	16667.7	11913.7	19281.9	22721.8	19389.7	8488.65	14188.7	13139.7	8418.21	6926.13	8866.9	5134.59	16687.7	12575.5	21047.1	18480.3	11772.7	20123.8	17289.3	10878.4	7107.14
O43548	O43548	TGM5_HUMAN	TGM5	Protein-glutamine gamma-glutamyltransferase 5																												2732.55
O43556	O43556	SGCE_HUMAN	SGCE	Epsilon-sarcoglycan	6579.65	5268.73	4131.78	6586.87	4362.03	4013.57	4453.13	7678.84	6105.23				4424.62		4344.21		3778.25	6564.68	6145.14	6417.22	3266.51		5603.98	4649.34	3261.51	5156.21			4120.22	4432.03		4197.5	6308.54		6388.59	5766.22	3568.09	4294.71			3761.88		3265.24	6803.24	5929.21
O43566	O43566	RGS14_HUMAN	RGS14	Regulator of G-protein signaling 14					36626.4	53658.2	38453.2			23163.3			57879.7	57392.8	41002.3	129947	60535.2	8134.55						43474.7	48446.7	44287.8	65085.4	64897.3	52828.4				7124.03				55047.3		69678.9	54853.5	52255.1	64831.6	52822.9
O43572	O43572	AKA10_HUMAN	AKAP10	A-kinase anchor protein 10, mitochondrial		6260.23		6119.51	10369.4	8219.81	7711.6	6802.06			5610.53		9367.4	10251.3	10530.3		10625	6391.18		9239.19			7605.36	9155.7	9350.52	10398.5	8931.01	9470.06	11388.5	6254.69		8622.84	8008.25	6558.69	7489.04	6274.83	11317.8	6609.46	9183.16	10206.8	8661.58		9336.4	9909.89	7422.22
O43581	O43581	SYT7_HUMAN	SYT7	Synaptotagmin-7	17301.8	16107.4	16895.6	18886.6	33842.2	44162.8	29957.8	20005.5	19353.9	23533.1	19305.5	18111.8	43009	63408	45655.8	26620.6	57508.7	20939.6	20519.3	24577.8	19603.8	13150.3	16544.1	38085.5	54972.5	44088.5	56458.2	50442.7	51250	14355.8	18270.5	31904.4	20302.1	21288.1	17306.3	18330.4	48162.1	17606.8	70958.6	60021.3	49626.7	28793.2	60485.2	31763.4	18936.7
O43583	O43583	DENR_HUMAN	DENR	Density-regulated protein	15374.1	16185.3	17174.2	21344.9	18291.6	17797	18303.7	18315.9	19768.1	41210.7	21702.1	21548	20412.4	22550.9	23708.2	47726.7	19389.9	28376.5	26207.6	19638.4	19760.3	16553.3	28685.6	18069.2	22127.7	22169.6	23358.2	17818	23062.9	19580.3	18660.4	22705.6	21442.5	22384.8	18314	23146.2	21249.8	16745.9	21803.6	25023.6	17060.2	39322.4	23752.8	23156.9	21514.9
O43592	O43592	XPOT_HUMAN	XPOT	Exportin-T	25313.8	25669	25463.3	26490.8	15720.9	20434.4	23415.9	22171.9	26854.2	26172.7	21697.4	26717.3	19302.1	19406.7	16142.3	29375.8	22377.3	20913.3	23076.8	24403.8	26061.1	27099.5	23064.2	21882.4	22914.6	22618.6	20505.2	22642.1	23548.5	24177.5	27865.2	25902.1	24708	27213.2	27237	26549.3	20871.9	18566.1	20179.3	21016.4	22640.3	25851.3	20815.1	24141.1	29029.4
O43598	O43598	DNPH1_HUMAN	DNPH1	5-hydroxymethyl-dUMP N-hydrolase	17408.7	17704.5	12273.6	8835.4	36018.1	33581.1	51947.6	20775.4	14879.5	58935.9	23382.9	25012.9	36879.6	20681.2	28230.4	77021.9	34274.8	35325.9	15158.1	7745.6	8424.39	14279.7	8055.6	23568.6	27571.5	25172.6	24108.7	24468.5	38087.7	23343.2	14413.3	19324.5	14610	9213.12	12137.5	12337.5	26820.5	25402.5	28185	31315.1	16076.4		22044.3	12546.2	14100.5
O43615	O43615	TIM44_HUMAN	TIMM44	Mitochondrial import inner membrane translocase subunit TIM44	14001.4	12733.7	15610.9	18063.7	22542.3	22968.6	25899.8	16482.2	16688	27499	16305	15986.1	24278.3	22497.6	26244.7	54143.8	20786.7	16401	14366.5	21483	19432	12572.2	13749.5	25776.2	18226.2	24280.1	24673.1	19854.9	23473.2	13422.6	17203.4	30112.5	21887.3	17153.6	18434.6	17077.9	21545	27472.3	25386.4	29260.7	28214.7	42634	25932.2	26477.9	17456.7
O43617	O43617	TPPC3_HUMAN	TRAPPC3	Trafficking protein particle complex subunit 3	69674.9	65025.8	55566.4	59526.2	90246.1	43491.8	22941.6	65970.8	50062		88527.8	49109.5	74499.2	80080.8	53651.5	17868.2	65848.6	93034.7	70373.9	69382.9	82005	40056.5	94964.8	39845.8	67209.8	75395.4	48036.7	36478.7	62372.4	80840	60893.4	55257.5	56119.2	61053.5	44418.5	74197.5	79790.9	51630.3	70832.8	50501.7	44148.9		60184.4	68065.4	57762.7
O43633	O43633	CHM2A_HUMAN	CHMP2A	Charged multivesicular body protein 2a	42864.7	35457.4	43730.2	40074.5	36543.3	38136.4	31677.5	40894.7	46612.6	34182.3	34114	45941.6	37501.2	28450.7	25785	29316.7	34613.4	48057	28971.5	30609.4	31727.9	39465.2	34737.3	37239.2	25372.7	26959.4	29157	29053.6	34765.5	38030.4	35115.4	30717.3	38283.5	42805.1	41203	35392.3	30199.4	37283.8	30942.7	29606.8	32580.8	15475.9	30681.3	31541.4	37948.3
O43639	O43639	NCK2_HUMAN	NCK2	Cytoplasmic protein NCK2	19127.2	20920.5	22056.7	26591.6	21181.2	18195.7	11286.5	22881.1	20230.8		26452.4	19333.2	15864	19020.4	18710.5		20299	25277.6	19250.9	16760.1	23732.6	21531.2	23090.3	18346.6	18049.7	21777.4	18246.4	17637.2	18693.7	21672.9	20953.2	19407.3	24426.8	24711.6	22767.9	24120.1	20594.3	16241.8	20802.1	20408.9	24400		21434.6	22029.1	21568
O43665	O43665	RGS10_HUMAN	RGS10	Regulator of G-protein signaling 10	5880.88		7710.32										4705.53					8973.06			6756.25			7764.55	3889.41			7069.27	6093.38			5321.69			3892.82	5689.55				5372.39			3839.56
O43670	O43670	ZN207_HUMAN	ZNF207	BUB3-interacting and GLEBS motif-containing protein ZNF207
O43674	O43674	NDUB5_HUMAN	NDUFB5	NADH dehydrogenase [ubiquinone] 1 beta subcomplex subunit 5, mitochondrial	87941.3	79509.9	56053.1	82476.6	83327.4	121618	127865	59906.6	91722.1	67581.6	70546.4	104239	127685	73354.3	90749.4	402390	73321	76966.6	67533.7	120582	55614.7	86052.8	56918.9	151457	84904.2	83132.6	124266	123728	102597	90628.4	110083	147223	96467.8	77131.9	98816.2	76356.6	145884	180610	168334	131387	149327	156026	129993	162073	81508.8
O43676	O43676	NDUB3_HUMAN	NDUFB3	NADH dehydrogenase [ubiquinone] 1 beta subcomplex subunit 3	43149.2			50945.2	62252.2	59726.4	43470.8	45647.7	29519.6		44903	39019.4	73580.6	72255.9	58188.2		70019.7			55977.3	52809.7		41584.4	55623	76348.9	58613.6	70779.6	56296.5	62159.8	43234.3	58792.5	70668.8	37505.8	38258.5	36019.1	37329.1	70190.5	92302.1	83905.1	68976.3	75089.6		91094.4	81465.2
O43678	O43678	NDUA2_HUMAN	NDUFA2	NADH dehydrogenase [ubiquinone] 1 alpha subcomplex subunit 2	129260	118565	141986	128077	185620	134216	104736	165380	162595	208572	162636	155651	303140	217796	178530	197310	196534	176380	163683	204870	188521	121804	124006	125559	162855	176106	160492	106158	134999	142040	200570	208262	162049	134159	100849	165812	227001	368693	218529	198479	218457	107975	233428	296278	133252
O43681	O43681	GET3_HUMAN	GET3	ATPase GET3	196438	227345	208733	160605	212958	219487	174553	198897	182777	157805	227578	154222	206769	163448	232922	197775	192768	193833	188682	154917	165074	164847	141068	195306	188327	170811	153617	168039	169621	233378	179124	181098	215938	207760	209495	173483	189041	161147	199980	202860	181481	154644	170683	153141	184622
O43684	O43684	BUB3_HUMAN	BUB3	Mitotic checkpoint protein BUB3	22695.2	21264.9	19929.8	23601.6	22885.9	18428.5	18309.7	25173.8	20720.7		21083	21758.3	18621.9	14936.6	20044.8		19545.3	24499.7	18887.5	24409.5	21309.7	22268.6	19226	17130.8	16957.4	18083.3	18431.7	15700.2	17820.3	18939.3	21886.2	23636.8	27209.2	23257.4	22395.8	21896.1	14322.9	19027.3	17602.4	15396.1	19338.9		17864.4	21957.2	20745.6
O43707	O43707	ACTN4_HUMAN	ACTN4	Alpha-actinin-4	178801	183245	168438	152055	117052	115997	123554	163649	188810	217070	184334	171477	104969	116100	123084	295587	122011	193114	149460	120610	163352	196433	161890	138940	106141	119043	120022	115289	119790	156013	150415	115713	185141	205963	223674	182539	109290	119089	123672	113629	119046	225404	118603	123971	191639
O43708	O43708	MAAI_HUMAN	GSTZ1	Maleylacetoacetate isomerase	32856.9	19173.7	24100.5	26169.4	19935.6	19247	24129.4	23825	31983.9	44060.7	20493.2	23711.7	23430.2	18218.1	16311	53309.8	17931	20628.3	25160.7	28729	21110	27401.2	17831.3	21699.1	20945	22895.2	15374.9	17241.8	13648.8	34406.5	29831.3	15916.3	19492.2	16329.2	23786.6	23051.8	19835.2	38775.4	16504.5	15166	19419.9		18452.3	22837.3	19590.6
O43716	O43716	GATC_HUMAN	GATC	Glutamyl-tRNA(Gln) amidotransferase subunit C, mitochondrial	4669.46			3858.98	8848.44	2728.11	4016.63	5477.24					6154.99	5592.78	5875.94		4277.72	4929.89		6682.72			4091.45	6419.61	4325.87	5201.1	5141.99	6465.79	5953.15			6939.97	4463.24	5283.39	5470.65	5237.14	9302.13	8022.68	6281.53	6011.93	6640.9		6209.45	4488.77
O43739	O43739	CYH3_HUMAN	CYTH3	Cytohesin-3		8361.15				12333.2	8863.63						14557.2	14689.8			13084.9				14710.9			11294.5			10509.3	10060.6												14186.9	12082.5		10925.8	11536.4
O43741	O43741;Q9Y478	AAKB2_HUMAN	PRKAB2	5'-AMP-activated protein kinase subunit beta-2	11306	12004.2	11289.3	13819.6	5673.87	11186.7	12127.6	11595.8	12267.3	8538.37	6722.84	12909.7	7691.66	7876.03	11610.8		10612.3	7195.26	12295.5		10097.9	12989.5	8164.46	8811.04	7723.57	6855.44	9048.32	8998.97	10479.5	8373.34	10411.6	5930.46	8476.27	12509.1	8250.86	11677	7084.24	8045.25	8723.02	9371.82	8862.93	13271.4	11181.9	8088.85	10504.3
O43747	O43747	AP1G1_HUMAN	AP1G1	AP-1 complex subunit gamma-1	80308	75164.5	63869.3	97314.6	46079.1	68820.5	78698.9	62372	83316.8	98920.9	77941.5	78154.2	91679.3	109352	63254	56785.9	110241	75284	68734.5	93107.3	100693	95653.7	94083.3	89076.8	103284	77712.2	92521.1	105332	105216	91966	86878.1	92211.1	100120	95261.3	84847.3	104679	103452	86927	98993.3	102175	96711.1	100644	94392.7	90509.6	96759.9
O43752	O43752	STX6_HUMAN	STX6	Syntaxin-6		6075.66			11056	11502.6	8729.08	6254.65	6519.2	8131.51	9778.85		8104.85	11491.5	11635.9	20040.7	13239	12273.2	5011.59	7481.97	6103.77	5124.11	6114.06	9398.81	12384.8	10248.8	10262.7	12696.3	11545.6	7768.03		9644.91	8500.74	7075.19	7162.56	6002.63	9723.08	7417.24	11620.8	12356.5	11304.8	10282.7	11223.7	6412.92
O43759	O43759	SNG1_HUMAN	SYNGR1	Synaptogyrin-1	26368.4	16450	15216.9	29442.1	84271.4	118945	102093	23504.6	20607.5		17506.1		174552	183498	131250		112933	21992.3		81801.1	26067.8		21181.3	130100	147578	155096	242884	147456	159110	17152.2	32828.2	200690	21089.7	20440.8	22687	17712.5	166335	100247	193467	243451	160775		220603	96475.1	26151.3
O43760	O43760	SNG2_HUMAN	SYNGR2	Synaptogyrin-2	25395.6	29785.6	14551.6	45855.8	8261.03			38758	32367.8		50706.9	22640.6	16458.2	26989.9	9644.25		14585.4	42354.1	31719.7	18532.3	61094.5		55352.3		24650.2	20274.2	9550.75	8819.04	16975	28515.6	22009.1	20615.8	49434.5	41293.4	31790.7	54241.2	17825.9	15379	17976.8	16185.8	11904.9		14193	31359.7	32378.1
O43761	O43761	SNG3_HUMAN	SYNGR3	Synaptogyrin-3	30198.7	12367.3	18762.7	40535.7	417050	328361	331266	26955.4	37221.4		26858.2	33404.3	534575	717752	372104	90157.5	645311	33398.3	22990.6	270401	34276.8		23219.8	488608	706438	505214	736217	588019	857557	22610.9	70301.9	705124	47274.5	19529	33032.3	20172.6	616934	216845	676683	639983	451358	130209	608933	271847	35502
O43765	O43765	SGTA_HUMAN	SGTA	Small glutamine-rich tetratricopeptide repeat-containing protein alpha	41487.1	35866.7	35604.1	39616.5	26967.7	34166	31202	35484.7	29911.7	54905.1	28263.4	42763.9	33747.2	23356.3	29578.6	82806.2	26144.2	32510.9	29679.3	28327.5	26305.3	31381.1	24737.6	37032	18440.6	29229.5	32541.1	28993.7	30848.8	39712.3	26707.8	32805.1	40705.1	45103.4	45615.3	34403.9	24064.7	17838.2	30516.8	32434.5	31019.4	45170.8	31017.9	26619.1	33817.9
O43768	O43768	ENSA_HUMAN	ENSA	Alpha-endosulfine	7072.94	7985.2	6255.01	7141.96	5567.54	5180.11	5040.42	7308.55	9819.1	14166.6	5097.56	7217.41	4814.09	5604.23	5383.97	19707.8	5784.64	7667.29	5348.48	6727.11	4091.09	7512.39	3707.22	4215.66	2779.51	4513.35	6709.04	5781.39	4218.23	5010.86	5762.05	4613.78	8403.73	7606.19	6028.34	4798.92	3007.12	4670.23	3641.57	6777.51	4713.53	10230.8	3902.81	4585.19	4658.18
O43772	O43772	MCAT_HUMAN	SLC25A20	Mitochondrial carnitine/acylcarnitine carrier protein		10291.4	13313.8	12976.1	12085.1	12819	10769.3	9841.78	13080.4	18355.2	13547.2	15686	9858.84	15827	10598.6	19715.7	9371.49	9828.56	11804.7	20167.7	14611.9	9656.34	21755.6	11118	13428.1	15387	11264.6	10914.2	9859.27		11521.7	14248.4	12609.2	11390.8	12322.3	11177	11163.2	16636	11391.3	14018.2	16004	15868.5	10901.3	19683.7	11871.5
O43776	O43776	SYNC_HUMAN	NARS1	Asparagine--tRNA ligase, cytoplasmic	66933.8	98440.8	99278.6	86999.6	75626.3	67272.4	81988	84212.4	93215.5	105024	115441	74298.6	65615.9	76387.3	86062.9	130957	63719.4	87907.9	120785	82060	104785	90830.9	106783	57122.3	80484.9	62479.6	60351.2	71953.4	70712.2	116815	107530	81190.9	92536.7	98993.9	91314.3	90952	89825.7	89252.1	71675.9	72424.5	62980.3	98834.9	68505.2	86975.3	101304
O43795	O43795	MYO1B_HUMAN	MYO1B	Unconventional myosin-Ib					12119.2	9690.92	11983.9	11220.8					9284.91	11206.3	12129.3		11856.9			10398.7			9576.73	9181.03	11855.9	12746.7	11236.7	7696.82	13276			11544	9949.38	9835.47			13881			12281.1	12050.1	15065.3	13092.8	17931.4	14702.9
O43809	O43809	CPSF5_HUMAN	NUDT21	Cleavage and polyadenylation specificity factor subunit 5	24926.1	23032.1	20929.1	25171.9	14712.1	17569.1	17176.2	23377.8	21514	31035.6	20254	21821.3	14598.4	15246.2	18083	63685.8	14163.3	19358.1	22928.7	20676.9	22700.4	24454.1	22179.9	18939.2	17587.1	16332.4	15045.5	17210.5	18973	20769	26724.3	22521.5	20442.4	20100.5	22478.8	20936.1	17472.3	34738.8	15631.7	16401.2	15202.6	23492.9	17336.5	23943.5	19301.9
O43813	O43813	LANC1_HUMAN	LANCL1	Glutathione S-transferase LANCL1	314428	307260	256071	278402	288653	206331	174750	287674	308295	255168	370479	212647	261831	257138	192769	372093	254494	341074	323644	231130	423003	313855	373323	201676	229723	253668	212631	221542	183517	303153	293420	158417	310746	297957	293865	376416	266139	147268	284092	237938	267453	230054	281195	241233	288490
O43815	O43815	STRN_HUMAN	STRN	Striatin	16800.2	15764.8	15332.2	16293.4	21948.6	20877.1	20513.4	17956.3	15235.8	34336.9	17134.4	11706.5	21284.3	21278.8	23394.6	24441.6	21089.4	18914.8	14099.1	14356.7	11535.2	20016.4	13370.4	19988.2	20858.1	23353.3	22842.8	27759	21850.1	15134.5	14211.7	13016	15434.7	15708.2	16141.4	14505.3	19315.6	17057	26520.8	23353.3	26127.8	34290.1	24851.3	14249.1	14778.7
O43818	O43818	U3IP2_HUMAN	RRP9	U3 small nucleolar RNA-interacting protein 2
O43819	O43819	SCO2_HUMAN	SCO2	Protein SCO2 homolog, mitochondrial					9047.15	6068.62					7894.47		8673.67	9535.79	7892.22		5771.34				8785.27			9530.14	8903.14	7346.83	6680.83		6873.62			8200.04					11825.2	2784.99	9462.24	7795.65	7967.76		4676.91	6190.96
O43822	O43822	CF410_HUMAN	CFAP410	Cilia- and flagella-associated protein 410		4771.38			7537.02	3690.59	2878.93	3658.16	11549.2	4133.96		3420.72	4035.13	19020.8	4791.77		2274.12	3308.89	3904.2	3367.98	2278.37	4410.6	3250.49	3005.52	4248.56	3190.49	3963.21	6860.1	3681.23	3128.83	3294.47	2765.96	3348.7	3218.75	3715.95	2445.77	4967.51	4110.8	3690	4013.31	4540.67		4014.47	3761.31	4092.3
O43837	O43837;P51553	IDH3B_HUMAN	IDH3B	Isocitrate dehydrogenase [NAD] subunit beta, mitochondrial	60018.7	62656.7	61298.6	50609.9	136062	161929	170688	60600.6	74965	128169	82189.6	57975.8	139748	106467	154406	377546	130106	69589.5	64484.4	111191	48091.1	69246.3	36661.6	156583	105795	101689	137668	164047	118767	77112.5	88221.7	152604	99354.6	74287.3	85764.7	66550.4	180103	209969	136653	187925	201206	214736	148337	126002	58041.4
O43847	O43847	NRDC_HUMAN	NRDC	Nardilysin	11860.4	11200.3	8058.29	10866.8	13476.5	14551.1	14023.1	5681.64	10580.9		9366.28	8643.72	11302.6	12982.1	12258.8	45604.9	7958.47	11582.4	10397.8	13535.5	10793.5	10162	8352.43	15907.9	9798.07	11940	16888.2	19083.7	13521.3	10120.6	14205.2	11967.6	9901.37	8498.41	10494	10395	14014.6	18159.6	16252	16303.8	15475.3		13478.3	10871.7	8169.29
O43852	O43852	CALU_HUMAN	CALU	Calumenin	22374.2	18259.6	19422.7	19591.1	27567.4	24420.5	18610.8	29033.2	20095.2	51263.3	23362.4	22135.8	23283.7	35894.2	30842.2	88648.5	29539.7	25988.9	19711.8	20837.8	27216.7	16262.1	22365.3	25747.9	21569.3	37618.8	29807.3	21507.3	29344.7	21849.5	26395.5	22897.2	23059.3	21313.5	20402.4	23333.6	25946.9	23775.3	24916	25478.5	29532.7	55889.5	26080.6	23341.9	22616.5
O43854	O43854	EDIL3_HUMAN	EDIL3	EGF-like repeat and discoidin I-like domain-containing protein 3	11056.3		13898.7		4238.79			8950.32	12363.7	16598.3	13453.6	16047.1	3944.41	10350.3			8308.07	13680	10442	6762.83	12441.8		11424	8768.9	8675.65		8209.88	7899.92	8465.51	8055.56	12203.6	5237.45	10292.3	8292.44	13971.8	11313.8	7100.43		5639.67	4400.58			7694.28	12910	10302.4
O43865	O43865	SAHH2_HUMAN	AHCYL1	S-adenosylhomocysteine hydrolase-like protein 1	130109	126680	114465	121973	172468	218635	224705	120771	129434	219426	119491	144298	229326	147668	232793	427073	209281	100571	77360.9	133084	114920	98437.7	106620	216374	142712	111883	202823	155353	181799	98207.5	144007	208957	109949	113542	135939	121820	178234	184591	194639	188534	198504	218316	196233	168138	108444
O43920	O43920	NDUS5_HUMAN	NDUFS5	NADH dehydrogenase [ubiquinone] iron-sulfur protein 5	42918.4	88185.1	81490.7	57719.9	147656	181642	84733.5	110070	77224.1	26139.7	164755	59431.3	126329	217106	286778	82419.4	148054	91452.2	91642.6	139373	153528	79343.2	102252	153251	212878	165930	243806	191856	173524	94550.9	70186	238137	109846	114265	105393	138638	165780	106713	252899	225064	199417		262157	207752	131306
O43924	O43924	PDE6D_HUMAN	PDE6D	Retinal rod rhodopsin-sensitive cGMP 3',5'-cyclic phosphodiesterase subunit delta	13936.8	15898.3	16810.2	14836.3	11801.5	11747.8	12208.6	13668.9	18441.8	8583.89	14775	14968	13322.9	11469.3	10284.6		11386.8	11725.7	15492	15020.6	12922.9	16050.5	14289.3	11546.3	11273.9	11785.2	14101	12824.4	12024.4	17124.9	13889.4	16987.3	12432.4	15664.3	15564.7	14088.8	13707.6	9568.1	10433.1	10903.2	12054		9390.67	14511.4	15151.6
O60216	O60216;Q9H4I0	RAD21_HUMAN	RAD21	Double-strand-break repair protein rad21 homolog	6210.99	5235.81	5229.79	8391.07		2803.59	4026.22	5619.06	6187.34		4640.1	7382.42	4417.78	4005.55	2496.57		4376.74	4412.77	5106.65	5258.7	4982.91	5905.84		3827.34	3894.24	3219.13			3265.28	4673.15	4910.56	3317.29	4581.3	4983.15	5150.8			5212.06	2941.4	2978.38				6006.58
O60220	O60220	TIM8A_HUMAN	TIMM8A	Mitochondrial import inner membrane translocase subunit Tim8 A	24833.9	24831.1	21320.2	23451.2	55574.9	48038.2	26258	22684.9	19242.4		22262.5	19343.5	58420.3	61276	49450.3		59667.7	31430	22464.9	55481.2	25153.5	22085.7	24303	59391.9	53670.2	69121.6	56960.4	56083.4	65559.3	22145.1	28138.3	62152.4	27273.5	24664.4	26138.8	27673.2	64762.6	37550.9	71811.1	67861.6	70400.8	26495	62877.1	64156.1	28917.6
O60232	O60232	ZNRD2_HUMAN	ZNRD2	Protein ZNRD2						14661.6	10192.1																			11846.8
O60237	O60237	MYPT2_HUMAN	PPP1R12B	Protein phosphatase 1 regulatory subunit 12B	5549.62	8102.63		7942.96	6192.48	6266.79		5763.47		11425.1	4341.77	6401.41	6692.47	3868.31	6711.06		5226.22					7335.51		5228.07	4359.34		6453.62	6569.73	5955.19	6591.07				6412.79	6465.53				4684.12	5618.06		12169.4	5243.92
O60244	O60244	MED14_HUMAN	MED14	Mediator of RNA polymerase II transcription subunit 14	12310.8					22558.4	30737.2		12559			13276	11069.3					6117.24		16646.7				30871				24921.8			9592.61	12342.1		13102.2	14494.2		17689.5	18339.8	9526.53	20707.8			18811.3		6412.23
O60245	O60245	PCDH7_HUMAN	PCDH7	Protocadherin-7	4690.26	3870.12	3118.66		13074.1	9930.9	9559.08	3972.5		8300.58			10114.5	8973.99	10367	14728.8	11782.2	4651.37	4176.86	6037.65	4577.83			8818.1	7262.86	7393.33	10369.3	10290.2	13494.1			10511.1					5348.1	5260.95	10324.7	7712.61	7321.29	19188.7	8716.55	6374.54	4493.76
O60256	O60256	KPRB_HUMAN	PRPSAP2	Phosphoribosyl pyrophosphate synthase-associated protein 2	46515.9	50164.5	52299.1	45852.3	64109.3	48266.3	43816.8	59918.1	48127.8	55687.7	68295.5	45633.4	46961.2	40926.2	44456.8	88171.8	51746.3	45711.6	49923.4	51542.6	51896.1	42715.8	43590	37888.7	44781.9	43732.2	45164.4	38404.4	42463.2	48031.9	43549.3	62006.4	45135.4	37347.1	44371.4	40410.1	46534.4	36671.5	42088.2	49972.5	39204.8	54763.4	37237.2	49415.4	36793
O60260	O60260	PRKN_HUMAN	PRKN	E3 ubiquitin-protein ligase parkin
O60262	O60262	GBG7_HUMAN	GNG7	Guanine nucleotide-binding protein G(I)/G(S)/G(O) subunit gamma-7	345734	348887	371139	389807	259961	382407	369706	284559	430666	228221	290608	427251	524606	572600	308487	331492	425213	407812	320817	290068	396666	499094	449261	503051	485123	507210	540972	557831	411908	324485	304409	173789	445828	555769	474283	469277	435572	222850	646001	606454	457679	537832	589982	311545	498227
O60264	O60264;P28370	SMCA5_HUMAN	SMARCA5	SWI/SNF-related matrix-associated actin-dependent regulator of chromatin subfamily A member 5	13738.2	13685.3	11593.2	12708	10837.2	9816.1	10003.7	13487.1	12875.1	21667.9	10461.4	13945.8	12595.1	10489.7	9042.11	22929.6	10480.6	11796.6	10444.8	13746.3	11717.1	12371.5	10348.5	9791.94	10945.7	11598.1	9589.15	9963.79	11858	12109.5	13976.5	13493.9	15513	10941	15790.9	11610.3	11374.2	14415.1	10650.3	10965.4	12271.2		9212.56	12055.9	12517.8
O60266	O60266	ADCY3_HUMAN	ADCY3	Adenylate cyclase type 3														3834.46	4031.15		3176.27								5561.02		6023.98	7792.13	6039.82				2657.62						5024.96	4744.27	5530.89	4415.58	5662.7
O60268	O60268	K0513_HUMAN	KIAA0513	Uncharacterized protein KIAA0513	7685.99	8914.59	7534.37	8582.87	15244.6	18843.8	15640.1	7818.7	9612.89	5655.66	6519.28	7685.21	13441.7	13437.2	17525.4	11958.2	11831	6770.68	5716.45	10534.9	5233.3	6009.41		17202.7	8077.2	13954.4	20359.3	15051.7	17058.9	4920.71	8150.47	16908.7	4577.45	7399.3	6997.74		9701.17	11066.1	16396.3	17543.9	14687.8	8404.53	14550.5	8480.4	6323.14
O60271	O60271	JIP4_HUMAN	SPAG9	C-Jun-amino-terminal kinase-interacting protein 4	17591.2	17290.5	17135.6	17078	20538.5	15890.3	12453.9	16297.6	13772.7	30797.3	14111	17426	12878.2	13005.5	16093.5	37977.6	11260.8	19152.7	16534.3	14403.6	15594.3	18724.9	14229.5	19081.3	12274.3	12576.2	14501.2	18637.3	16554.1	18252.4	17281	15269.4	16006.3	19622.9	17555.8	14969.1	13972.2	16036.7	14483.6	13877.7	14629.4	11371.7	13388.1	14696.1	17065.1
O60282	O60282;Q12840;P33176	KIF5C_HUMAN	KIF5C	Kinesin heavy chain isoform 5C	95460.8	96148.4	102767	99367.2	77454.6	87442.7	88304.3	90137.7	100023	136062	80295.5	91170	76682.9	80775.7	80359.7	220897	100681	86522.2	84734	74058.1	77035.1	93025.3	79597.8	83035.4	77219.7	81909.3	95190.6	81345.4	84260.9	95641.2	84265.4	71147.4	97811.5	115307	97046.5	101581	70962.9	55368.9	88554.4	89030.3	92232.2	114057	88847.8	65573.4	97969
O60287	O60287	NPA1P_HUMAN	URB1	Nucleolar pre-ribosomal-associated protein 1
O60307	O60307	MAST3_HUMAN	MAST3	Microtubule-associated serine/threonine-protein kinase 3	8085.54	8652.32	8991.44	8465.13	13132.3	13462.7	12022.6	8322.52	7823.37	11101.7	7354.28		14355	15827.5	13221.5	40245.3	13641.4	9075	4230.31		7527.94	9774.54	7080.98	16055.1	12796.8	14713.9	15357.7	15472.8	15374.4	6165.08	6790.35	6508.24	7959.59	9101.49	10000.9	7300.42	14715.9	8171.15	17662.9	13574.2	13321	23451.4	14171	7086.99
O60313	O60313	OPA1_HUMAN	OPA1	Dynamin-like GTPase OPA1, mitochondrial	38682.1	37529.4	35543.7	41362.6	89995.9	119909	103273	39209.9	40509.2	81986.6	51816.3	40571.4	110850	118647	118027	157513	116038	49360	47034.5	61235.8	52592.1	39679.5	40583.3	115892	101599	107821	128714	136498	122328	42202.7	48897.2	101547	52738.4	50648.7	46298.2	48825.2	121788	87205.1	150990	154937	150413	122488	149284	65629.2	48793.1
O60331	O60331	PI51C_HUMAN	PIP5K1C	Phosphatidylinositol 4-phosphate 5-kinase type-1 gamma	43754.5	48598.5	46454.2	44661.5	69580.2	86600.5	96731.4	34792.5	45765.6	62748.2	34699	42279.9	84603.7	71964.9	69360	207878	81578.7	39929.3	31970.5	40736.7	31736.6	45366.3	31327.6	84590.7	66954.5	67370.7	92719.8	91669.8	70833.3	39626.2	42948.8	55541.2	48408.6	40896	52965.5	38360.4	81171.4	43494.5	92204.4	90016.4	94441.6	88366.6	85473.8	49574.7	40285.4
O60333	O60333	KIF1B_HUMAN	KIF1B	Kinesin-like protein KIF1B					4446.69	4172.05	7483.04			4880.4			4614.07	4233.15	2642.81	11662.8	4603.35							4949.32	4033.28				5422.54			4907.5		3817.71	3990.44	5661.4			5325.69	4175.14
O60343	O60343	TBCD4_HUMAN	TBC1D4	TBC1 domain family member 4	15314.9	13543.5	13960.1	15124	15997.2	17637.1	13577.7	14548.1	14602.6	19632.6	13399.3	13837.3	16082.7	15581.2	16916.3	18491.4	17061.8	13612.5	14627.9	17386.1	15458.4	17490	14595.4	15977.9	15062.5	17067.3	16064.8	16224.7	14268.8	12211.5	14442.3	13509.8	15881.1	14846.1	12786	14542.2	15859	23791.6	17027.1	17250.5	17811.8	25622.3	14920.8	17731.6	15273.4
O60346	O60346	PHLP1_HUMAN	PHLPP1	PH domain leucine-rich repeat-containing protein phosphatase 1	11900.6	12301	14676	10906.5	4467.34	5296.46		12936.7	10548		9911.58	7073.04	5506.97	4817.56	3708.58		4087.68	14941	7481.23	8411.67	9285.78	12304.7	7808.63				3685.11		4477.78	7503.46	10229.5	5127.44	8561.25	9411.91	13868.3	8520.24		7176.34					3439.32	9383.34	9604.07
O60347	O60347	TBC12_HUMAN	TBC1D12	TBC1 domain family member 12	7322.48	11476.1	6724.5	6225.39	2189.21					15927.4	2807.58	7528.77										10083						2682.8		6813.44	5647.08			9289.96	5783.3	3346.11
O60437	O60437	PEPL_HUMAN	PPL	Periplakin						4128.01																						4536.52			13277.1						18691.7	10384.4					7371.12		8128.56
O60443	O60443	GSDME_HUMAN	GSDME	Gasdermin-E	25399.6	29279.7	19892.4	19104.1	18986.1	16613.1	13403.4	18699.2	16526.9	17885.9	12432.4	15971.3	16051.9	15863.7	13156.1		23907.7	14072.9	15452.3	19507	13161.8	23899	15783.6	12863.8	19638.7	14025.3	12924.4	12444.5	17599.8	18110.2	14690.3	20082.3	14092.3	22012.4	17232.7	18842.9	11598.3	14465.1	13330.4	13137.5	15465.5	19496.9	12719.3	21129.2	19221.6
O60462	O60462	NRP2_HUMAN	NRP2	Neuropilin-2				10423.9	6539.19	8791.79			6325.75		5974.89		9347.6	8097.34	8837.95		13920.4	7886.23	9754.63	10159.4	4592.67	5653.46		8913.51	9267.21	7028.05	7737.28	9072.84	9308.73	8662.71		23935.8		7988.58	7213.55	7675.83	10393.7	10500.1	8170.29	9921.33	10830.9		8724.8	6962.73	7099.49
O60477	O60477	BRNP1_HUMAN	BRINP1	BMP/retinoic acid-inducible neural-specific protein 1					9456.22	10622.3	15997.2			14360.3			16477	13692.2	10264.2	22208.3	13967.2			4766.07				11780.8	13928.3	15519.6	15419.6	13654.3	13125.1			10839.1					15719.8		15579.2	15185	13684.6		17871.5		8021.53
O60486	O60486	PLXC1_HUMAN	PLXNC1	Plexin-C1						4127.89							2536.95			10237.7	5321.86										4963.28	4340.46				5001.2							3614.66	3591.13			4134.42
O60488	O60488	ACSL4_HUMAN	ACSL4	Long-chain-fatty-acid--CoA ligase 4	11761.1	10871.1	9783.12	8469.07	13586.6	16572.5	18004.2	9045.73	14791.6	18036.7	7154.71	12129.5	13597.8	12955	17807.1	28128.7	11051.3	7000.35	8324.16	11291.8	6634.03	9202.44	6443.89	18175.8	11834.2	12661.5	14332.7	18551.8	15951.6	10321.8	11337.1	11421.6	11594.9	12844	11392.6	9893.49	12694.4	14658.3	13527.9	16360.1	13089	18681.1	13423.9	9167.79	12210.1
O60493	O60493	SNX3_HUMAN	SNX3	Sorting nexin-3	30571.2	30700.5	34093.2	29049.6	32497.4	38071.7	32514.1	36245.4	34293.9	36188.2	41615.9	31762.7	36544.3	39307.7	36465	67286.4	29528.5	43234.4	28192.3	35199.5	31738.9	28143.1	33589.7	33942.8	30251.5	38828.6	24724.9	27302.5	33732.4	25815.9	34392.5	41174.4	32137.5	33843.5	34072.2	34309	41512.7	33600.8	31695	32341.8	35394.9	37177.8	36052	31820	34659.9
O60502	O60502	OGA_HUMAN	OGA	Protein O-GlcNAcase	13963	15269.7	12910.5	12000.9	14566.5	16423.2	16416.5	21703	12459.2	27300.2	22138.2	11568.8	19441.1	20779.5	18227.5	30594.2	23260.8	20702.9	26695.8	15053.5	22740.6	15969.4	21607.1	14823.6	24572.9	18158	18691.4	17046.3	19737.4	19089.9	16585.1	21316.9	19343.2	19021.5	16218.9	28245.7	20948.4	16195	19146.2	18016.4	22426.7	26973.3	22302.8	14327.2	18184.4
O60503	O60503	ADCY9_HUMAN	ADCY9	Adenylate cyclase type 9	12891.8	10570.6	12197.2	13204.9	22993	24354.6	19559.3	13273.1	11053.3	23673.6	10232.9	15837.1	26017.7	25180.3	21527.8	60648.8	23489.7	11760.1	15300.8	9199.34	11913.8	13355	11253	27306.3	23627.8	25771.3	27366.6	28874.7	24022.4	9698.73	15304.8	10266.9	13561.9	13328.7	13518.8	11764.1	23394.7	13493.2	35233.6	27286.9	34707	43319.3	28739.9	11072.4	14753.2
O60504	O60504	VINEX_HUMAN	SORBS3	Vinexin	11421.6	13314.8	12631.9	11172.1	11306.3	10887.5	10464.9	10097.9	15166.3	17608.5	7976.63	14118.6	13751.1	6801.68	9872.77	23575.5	11455.5	9819.11	12481.2	12477.2	6246.9	15813.3	8187.3	13262.1	10785.5	11125.2	8839.04	8713.33	8711.64	11677.2	13346.1	8960.53	9569.53	13814.7	12441.5	13069.6	8930.98	15026.3	7739.52	9535.52	10932.1	11592.4	9287.83	13475.7	9329.9
O60506	O60506	HNRPQ_HUMAN	SYNCRIP	Heterogeneous nuclear ribonucleoprotein Q	43174.6	37568.4	39355.3	36486.1	41591	36702.7	26932.5	43356.1	38107	30752.8	43558.4	36474.4	33044.9	27835.3	37320.8	42651	25508.1	43148.6	39305	42164.7	41258	38281.7	37489	32735.2	23820.7	37941.8	28639.2	29437.5	30626.9	36813.6	37334.2	29724.9	37948.5	36474.8	33228.7	38886.9	33605.9	49694.6	30281	30701.9	30859.9	26762.2	31148.9	38689.8	34666
O60518	O60518	RNBP6_HUMAN	RANBP6	Ran-binding protein 6	8633.42	8739.45	7257.09	10944.7	11850.8	11589.7	16356.6	10577.3	9878.75	14565.7	13603.5	9642.63	13744.6	17021.8	16493.2	27748.2	14498.5	7539.63	8312.04	11737.3	9108.46	10492.4	11495.1	13611.4	16128.4	13948.9	16287.2	14121.4	15730.7	8192.48	12721.3	12262.1	11183.5	9807.99	9981.29	9506.56	14516.1	15493.3	14029.2	14190.4	13859.7	15408.5	13534.5	10705.3	9402.18
O60524	O60524	NEMF_HUMAN	NEMF	Ribosome quality control complex subunit NEMF	11861.4	17762.3	12381.1	15304	13962.7	10787.6	12844.5	17559.7	15034.2		16488.1	13231.6	11733.7	16329.1	12990.4	33167.5	15595.9	17477.9	19905.3	18397.6	18242.1	13937	17635.5	15336.3	18241.7	16077.1	15183.6	13609.9	19626.4	15687.3	18026.8	14032.1	15687	18093.2	15005.8	16589.2	16429.2	13428.9	14825.1	13425.9	14027.9		13528.1	13466.1	15398
O60547	O60547	GMDS_HUMAN	GMDS	GDP-mannose 4,6 dehydratase	9382.04	12508.9	8977.09	8269.09	7875.59	10495.9	10709.7		10582	12812	8336.42	8788.93	10285.9	10586.6	9262.39	20079.5	12275.5	7809.73	7255.91	7889.9	8537.58	8354.8	6669.43	10581.9	10610.3	6629.7	13091.4	11643.2	9589.91	8936.7	11117.2	8807.96	10139	11832.5	8628.21	8549.35	9132.27		11749.6	12141.8	10100.1	13031.5	13710.5	6564.58	9605.86
O60551	O60551	NMT2_HUMAN	NMT2	Glycylpeptide N-tetradecanoyltransferase 2
O60568	O60568	PLOD3_HUMAN	PLOD3	Multifunctional procollagen lysine hydroxylase and glycosyltransferase LH3	7809.43	8188.35	6204.74	8937.84							7150.25		7253.48		6911.11			5189.4	4331.43		8671.6	4640.35	6266.34				7528.75					6412.25	7458.77	5110.5	6962.67	6542.63			8079.85		7806.56		5530.88	5582.94	7177.06
O60610	O60610	DIAP1_HUMAN	DIAPH1	Protein diaphanous homolog 1	10376.7	12597.3	12063	14962.1	14207.5	19610	19670	9473.51	11318.3	19634.3	10850.8	15336.1	18750.4	23872.2	18271.5	47832.5	24159.5	13349.1	12851	12752.3	8625.53	8828.48	10749.3	15942.6	19865.6	16372.8	20221.1	17492	20130.7	11606.2	10112.3	15531.6	12324.1	11210.3	7433.33	10447.1	20043.6	9516.94	22662.7	19981.2	15946.8	25051.6	19499.4	10303.2	10115.6
O60613	O60613	SEP15_HUMAN	SELENOF	Selenoprotein F																											11300.7
O60637	O60637	TSN3_HUMAN	TSPAN3	Tetraspanin-3
O60641	O60641	AP180_HUMAN	SNAP91	Clathrin coat assembly protein AP180	258063	262593	212808	263284	240574	303089	254532	294762	231856	347314	274293	251687	295658	384660	361232	353637	389724	244083	228680	305246	264452	241381	282549	238003	360155	262237	374734	377268	346828	238263	236981	402343	245864	290816	229366	266089	290047	221590	321025	321717	263343	275144	364145	273366	247230
O60645	O60645	EXOC3_HUMAN	EXOC3	Exocyst complex component 3	23309.9	24419.9	24957.2	27139.1	27087	30642	25450.7	24194	25038.6	30373.2	20098.1	21884.8	29252.5	26422	28389.4	30520.6	27383	24916.6	24162.1	25502.8	22207.1	23094.4	20347.1	27876.7	27033.4	32664.2	26732.3	27294.6	28162.5	23432.5	25238.2	24465.7	23240.4	24067.1	19711.7	19805.4	27512.6	23467.8	30013.3	30160.7	29341.2	34401.6	27038.6	24112	20997.4
O60658	O60658	PDE8A_HUMAN	PDE8A	High affinity cAMP-specific and IBMX-insensitive 3',5'-cyclic phosphodiesterase 8A	12847.4	15738.4	13026.7	12628.9	7394.34	5387.67	5997.11	14304.9	10707.1	13438.1	12582.5	13039.5	6668.09	4407.46	5845.03		5386.17	15193.2	9157.97	10574.9	10297.2	15509.7	9397.74	5676.19	5656.87	6989.46	4549.56	5855.35	4522.82	13634.2	12771.1	4981.97	11121	13624	16973.9	11562	6007.01	9885.92	2920.86		5817.47	8055.07	5465.14	11005.3	9427.9
O60664	O60664	PLIN3_HUMAN	PLIN3	Perilipin-3	85438.5	104283	119767	100645	29295.8	23305.7	15323.5	85799.8	113345	30172.8	57460.9	82437.6	18969.4	23645.7	20007.2		24019.5	75871.1	97245.2	62492	108153	121621	74012.5	19177.3	20321.5	23913	18555.4	16103.4	19098.6	89569.1	58097.1	24111.6	118453	90217.6	119088	96919.7	17219.1	19560.9	14431.5	20630.7	14427.4	25730.7	18423.3	59457.1	113363
O60669	O60669	MOT2_HUMAN	SLC16A7	Monocarboxylate transporter 2
O60684	O60684;O15131	IMA7_HUMAN	KPNA6	Importin subunit alpha-7					22228.7	29893.8		23660.6						28617.1	28934.1				21016.6									27576.6		19194.1				20054.3				27185.4	26934.4		26817.1			26817.4
O60701	O60701	UGDH_HUMAN	UGDH	UDP-glucose 6-dehydrogenase
O60716	O60716	CTND1_HUMAN	CTNND1	Catenin delta-1	23280.2	25466.2	25924.5	23539	23598.6	25670	27173.7	24808.7	16425.5	14284.8	30759.2	20064.3	31287.2	27245.5	25182.3	46834.4	29088.1	24777.5	24227.6	26016.3	26491.2	24767	26157.5	23542.4	24162.8	27866	26546.6	24470.5	20333.7	21472.7	22484.3	27586.8	23786.7	24169.7	25890.2	26512.1	26353.4	17961.3	23318.4	25752.1	29147.1	6476.48	28638.2	25372.7	25631.6
O60725	O60725	ICMT_HUMAN	ICMT	Protein-S-isoprenylcysteine O-methyltransferase													7896.16	7102.13		12485.7	8096.4							8369.95					9716.45										7476.09	7384	7612.51
O60733	O60733	PLPL9_HUMAN	PLA2G6	85/88 kDa calcium-independent phospholipase A2	9285.09	8259.31	8757.19	10247.3	8649.7	9556.09	7792.17	13529.9	7101.05		9720.96	10374.8	9059.39	12197.1	11023.5		12124.7	10804.4	11836.6	8312.72	11754.2	8356.08	10661.7	8007.89	12460.3	10643.8	11351.9	9108.29	11139.7	9346.97	10597.6	10465.4	11761.1	13561.2	13467.9	11838.4	10141.6	5646.28	11241.4	11553.8	9706.58		10666.3	9655.69	10202.4
O60741	O60741	HCN1_HUMAN	HCN1	Potassium/sodium hyperpolarization-activated cyclic nucleotide-gated channel 1	10082.2	8927.48	6688.14	8597.68			5776.1	6477.7	9878.57	9792.96	6868.58	8170.13	4382.73			8758.5	5110.12	7321.38	4437.68	6404.96	6285.49	12560.5		4742.83	4566.05		4694.18	3720.9	4986.37	8145.83		6315.23	7994.08	7589.34	8462.92	5657.54		8316.55	5487.8	4568.72				6124.98	7267.02
O60749	O60749	SNX2_HUMAN	SNX2	Sorting nexin-2	20372.9	27382.7	24005.2	21932.5	22272.2	23631.6	24594.1	20969.6	22379.5	36420	20799.8	24903.8	20448.7	18131	23288	64297	23147.3	23719.7	19459.8	17965.7	17102	22809.9	17650.3	22228.2	15428.1	19187.3	18198.7	20174.5	18702.6	23035.2	20249.1	20198.8	22090.1	20262.3	24287.1	19629.9	19510.6	20399.3	18716.1	19869	23386.5	39484.3	18251.6	18890.2	20791
O60762	O60762	DPM1_HUMAN	DPM1	Dolichol-phosphate mannosyltransferase subunit 1	9007.35	7059.33	8069.01	11360	10626.2	12194.6	12806.7	8590.01	8643.95	10859.8	7006.35	9760.2	15400.5	17238	12783.7	22067	14883.5	8508.45	8516.94	11188.5	10718.6	10053.6	11030.6	13803.3	16605.4	13452.9	17273.1	15658.3	16944.4	9364.76	10922.7	11188.3	11214.2	10842.1	9916.55	9239.03	14697.8	13198.8	16540.2	15244.6	16482.2	18445.5	15046.3	14396.7	10064
O60763	O60763	USO1_HUMAN	USO1	General vesicular transport factor p115	64713.2	62726.6	68128	62630.4	66746.3	70583.4	55936.8	68257	62977.2	82328	53621.5	60941	64919	63036.1	76237.1	118177	64398.8	65175.8	55603	62014.7	46701.4	65307.1	49863.8	74593.2	55782.2	69751.6	70711.4	72113.2	76055.8	59128	61724.9	58240.6	69513.1	68315.4	64948.9	64775.3	54858.5	71680.3	70390.9	77167.3	67079.3	70661.5	77512.1	58845.7	67913.8
O60783	O60783	RT14_HUMAN	MRPS14	Small ribosomal subunit protein uS14m								4223.58								7044.62		8314.43																	8292.21			3839.41				5898.7
O60784	O60784	TOM1_HUMAN	TOM1	Target of Myb1 membrane trafficking protein	57365.9	65675.6	52089.9	47778.6	64387.4	61577.2	56690.2	52044	48220.1	69253.1	56483	43390.5	57234.5	49434.6	55209.8	65744.3	58503	48591.9	53300.1	51173	40588.2	50273.2	42559.3	54907.4	61954.3	42492.5	54347.3	60132.8	55512	50547	46474.4	71464.4	45711.5	56497.1	50542.5	46297.7	50320.4	44501.4	56911.5	61058.6	58086.5	57657.2	51116.4	45169.3	51414.4
O60825	O60825	F262_HUMAN	PFKFB2	6-phosphofructo-2-kinase/fructose-2,6-bisphosphatase 2	55481.4	48985.8	57141.9	50559.3	41432.7	35648.2	41362.6	45729.2	46298.9	52849	52995.4	42356.2	34889	35500.7	36372	79356.5	34862.1	37640.2	40752.5	40491.1	41774.5	62885.8	48071	30005.7	40830	38676.5	38584.6	37888.8	40986.5	45011.4	52551.3	31600.5	51646.2	44093.4	54218.5	44650.3	32682.2	36547.5	31069	34454.7	43869.4	52324.2	32643.4	49279.6	59027.8
O60826	O60826	CCD22_HUMAN	CCDC22	Coiled-coil domain-containing protein 22	16419.9	18407.9	17841.3	20877.1	16689.7	20180.9	20142.2	20452.8	16252.1	25156.1	21297.3	24092	18969.1	19951.1	22022.3	27365.6	18384.1	16955.3	20829.6	17992.4	19895.8	19462.3	19142.4	16802	21228.2	17837	18599.7	21578.6	20646.7	20461.5	19072.4	23647.1	19388.8	18823.9	21722.4	19611.3	18370.6	19250.8	19383	18494.3	19729.1	31602.7	18073.1	22724.8	21024.2
O60831	O60831	PRAF2_HUMAN	PRAF2	PRA1 family protein 2	81488.6	85938	87785.7	122867	135105	70566.9	42403.9	112184	87315.4		122223	76006.7	127355	145543	106325		113971	125236	119153	128101	111677	73653.3	90522.5	83681.5	138495	151005	89671.3	95128.4	121814	81598.2	82354	128077	107585	94293.7	93562.3	97844.4	114294	31699.9	140114	101434	103773	70256.4	104411	113720	106145
O60841	O60841	IF2P_HUMAN	EIF5B	Eukaryotic translation initiation factor 5B	10022.4	11391.7	10216	14929	7150.39	9880.63	9747.04	11646.6	12299.8	13332.6	10670.8	12962.2	10017	9325.04	8760.81	11996.4	9026.98	11995.9	11609.5	10558.6	9225.36	11397.7	9240.63	10241.6	9109.8	9985.42	8796.14	8317.08	9921.31	11088.5	11693.1	9570.32	10183.6	9851.04	9902.15	8392.97	8621.51	12110.1	8194.72	10325.1	7875.14	12176.1	7795.93	10057.8	10817.5
O60861	O60861	GAS7_HUMAN	GAS7	Growth arrest-specific protein 7	28527.5	27721.6	27527.7	22793.6	17321.1	23091.6	19572.6	23123.4	26920	32198.2	28004.8	23521.1	19025.1	18962.3	16785.3	49591.4	18565.5	30436.5	28216.5	21556.5	25469.2	22505.7	25821.9	17303.5	18444.5	18192.1	21129.2	18844.6	16371.2	29399	25658.8	13709.6	24849.3	28500.9	29104.8	21382.2	18479.6	15622.6	22884.8	19057.7	20790.4	17079.1	18890.9	16583.7	20967.9
O60869	O60869	EDF1_HUMAN	EDF1	Endothelial differentiation-related factor 1	15583.8	12554.5	17324.5	15058.3	7582.59	8482.92	11082.1	13877.7	14875.2	20977.7	13695.3	17160.3	7502.01	8997.09	9883.74	19579.1	9575.63	11954	8508	9943.26	19060.4	13235.6		11638.4	7970.91	7368.37	10433	7960.1	11712.7	10659.2	13016.7	9483.01	10024.2	12762.1	13905.5	12281.6	8268.64	13373.6	10118.7	7980.52	7327.24	16615.3	8382.98	10289.8	9834.92
O60879	O60879	DIAP2_HUMAN	DIAPH2	Protein diaphanous homolog 2	6892.97	4791.92			10489.9	15333.9	11658.4	5660.7		8503.6	7279.8		18197.9	20285.5	13300.4	23787.3	18998.9	11586.8			6776.69		7080.28	13295.3	15686.3	16421.8	19904.8	18353.8	16460.8			6111.09	8105.21	5200.9			19856.9		18512.3	17338.8	14974		15848.2	7459.09
O60883	O60883	G37L1_HUMAN	GPR37L1	G-protein coupled receptor 37-like 1							2334.2			7516.43						5171.26				1663.13																2268.14
O60884	O60884	DNJA2_HUMAN	DNAJA2	DnaJ homolog subfamily A member 2	63964.1	70659.1	68351.5	59199.8	44039.6	73122.9	55158.8	58998.4	76982.3	64849.1	65288.7	53435.9	56737.6	64874.9	50528.8	136967	59850.8	65119.6	63604.6	62536.6	64452.4	70039.2	68314.2	56249	54357.7	55815.7	66320.4	67702.2	66004.1	61535.9	63431.7	61287.7	62905.2	70339.9	61814.2	65927.8	51727.8	60368.4	71343.6	64294.3	55323.1	70773.6	61083.8	58211.3	66551
O60888	O60888	CUTA_HUMAN	CUTA	Protein CutA	414657	437194	404669	356578	557132	350770	331062	411033	477854	373927	382924	332394	442803	446406	357850	548927	528998	490535	456778	416564	416733	451799	389000	435326	431424	434564	448205	381397	351678	495132	496268	250549	394811	404077	389166	384099	423682	385128	345456	361388	321318	399311	440544	311246	395183
O60890	O60890	OPHN1_HUMAN	OPHN1	Oligophrenin-1						5921.26	9179.2						4745.34		6759.64	6276.57								7205.29			6133.94	5832.48				7106.85							6306.16	7775.79	7858.92				3683.36
O60911	O60911	CATL2_HUMAN	CTSV	Cathepsin L2
O60925	O60925	PFD1_HUMAN	PFDN1	Prefoldin subunit 1	40405.9	50925.9	56799.5	27585.5	40242.5	50772.7	35268	43385.8	37697.7	29424.9	39894.9	35641.1	34626.7	14470.5	37577.4	31430.4	21810.4	39600.3	28649.8	41944.3	39993.9	29309.3	29107.7	40273.3		31318	22779.5	33830.3	33755.4	52624.2	43981.8	45511.7	34538.7	52566.6	33187.4	35067.2	32174.7	28046.8	41671.4	39708.6	40527.8		37329.4	25706.4	45052.7
O60927	O60927	PP1RB_HUMAN	PPP1R11	E3 ubiquitin-protein ligase PPP1R11					8569.49						11843								6525.37							6373.37										11100.2				9779.49
O60936	O60936	NOL3_HUMAN	NOL3	Nucleolar protein 3	75995.6	57909.3	45495.3	49694.7	66484.2	27798.3	40949.1	43962.8	36909.1	56148.8	45353.5	62072.9	34621	50699.1	18176.4	22805.4	37350.2	68714	48408.1	56035.4		46158.9	41129.8	54437.1	47925	19770.5	38326.3	40766.8	55251.2	61502.9	54122.1	47105.3	49325.6	56864.9	50078.6	57550.6	34919.4	56350.5	45218.9	35688.7	25518.4	49137.3	31659.3	64089.4	66684.3
O60939	O60939	SCN2B_HUMAN	SCN2B	Sodium channel subunit beta-2					27766.7	33257.1	25494.6				15518.9		79293.3	87383.5	50277.1		51389.8	26771.7	12266.4	37256.3	30412.7		29784.8	36883.3	69444.5	53739.3	70145.6	27916.6	43944.4			51315.6			14447.6	14335.4	56133.7	11427.8	71802	61336.7	36841.9		94176.3	27198.7
O75027	O75027	ABCB7_HUMAN	ABCB7	Iron-sulfur clusters transporter ABCB7, mitochondrial	12599.9	9458.38	10189.9	10840.8	11792.3	16786.3	18080.9	12193.9	11148.6	15001.8	12079.4	10838.4	18732.3	20331	13147.8	36849.7	21444.9	8952.47	9664.85	14706.8	10906.7	11049.4	10999.1	17997	16292.4	18422.4	17565.8	16192.1	19652.7	10401	11005.1	19465.5	13174.1	9810.65	12001	9811.61	19678.6	19560.7	17725.9	21796.2	20089	16819.2	17299.5	16659.8	10561
O75037	O75037	KI21B_HUMAN	KIF21B	Kinesin-like protein KIF21B		10630.7	8183.17	12709.1		9696.05	10894.7	7853.5	8870.73	8382.14		12913	10457.3	10490.2	7828.81		14009			9365.2				17612.5	5758.65	7989.76	6989.55	10965.9	11544.1	12721.9	9809.37	13046.9	6404.12	12266.9	6900.55	10808.2	8374.21	8014.9	13045.5	12310.5	9758.74		6908.65	10434.5	9556.49
O75038	O75038	PLCH2_HUMAN	PLCH2	1-phosphatidylinositol 4,5-bisphosphate phosphodiesterase eta-2	13515.3	17722.5	16426.2	18204.3	7818.39	18271.3	12724.9					23061.7	11395	17001.7	14792.9		18585.4	13747.3	11243.2	12814.9	11259.7	23436.9	11765.2	8125.95	15249.4	9976.73	21916.9	19325.8	17215.4	13789.1	13860.5	11200.7	19629.7	20122.5	19780.3	14345.3	10191.9		10380	13948.4	9850.83		12632.2		14208.2
O75044	O75044;Q7Z6B7	SRGP2_HUMAN	SRGAP2	SLIT-ROBO Rho GTPase-activating protein 2	18736.1	19619.1	23216.6	20391.3	18854.6	21673.8	15869.2	22320	21711.9	27422.4	19650	20052.6	21393.5	22048.3	22236.7	38604.4	22387.1	21693.3	20899.1	20709.8	23128.1	22258.1	20115.9	18271.7	20545.5	22466.4	20991.4	19683.4	20936.4	22672	19604.1	24012.9	21582.2	22184.3	21779.9	19581.6	19432.7	18510.7	21731.4	22237.3	19668.9	23542.6	18667.7	20271.5	20996.4
O75051	O75051	PLXA2_HUMAN	PLXNA2	Plexin-A2					9166.96	12078.6	7993.82						8253.59	13079.9	9783.61	12056.9	13911.9			6944.55				8137.19	11747.5	8753.18	11426.8	9260.48	12763.4		5140.98	10206					7528.1	13295.3	10188.6	11687.3	10170.5		8968.5		9631.14
O75061	O75061	AUXI_HUMAN	DNAJC6	Auxilin	76432.7	79023.8	75487.8	66717	68442.3	85565.2	71826.2	73207	69960.3	70081.2	92319.5	52512	73313.3	78906.2	88943.5	78371.9	67434.2	66970.9	71659.3	78990.2	74413.2	80951.6	71523.7	86093.5	67705.7	67618.1	95533.9	86123.9	87258.7	80858.5	77306.3	109817	74155.4	86377.2	78558.6	74510.3	79886.2	71242.8	101513	92802.5	73465.4	76303.5	89194.1	63967.9	65947.8
O75063	O75063	XYLK_HUMAN	FAM20B	Glycosaminoglycan xylosylkinase
O75064	O75064	DEN4B_HUMAN	DENND4B	DENN domain-containing protein 4B	12568.8	11981.2	13585.3	13777.9	16830.3	14183.6	15449	12473.1	12950.5	15648.6	14441.9	12631.6	18514.5	21467.8	11355.4		21139	13307.3	11989.9	15053.8	12171.2	15481.6	10316.8	16651.7	20733	14831.6	15562.7	15956.3	20394.4	13451.1	13050.2	21781.9	15046.6	14292.5	14295	13550.1	17601.5	13425	21313.1	17805.2	15067.4	20902.2	16084.4	15221.9	14532
O75069	O75069	TMCC2_HUMAN	TMCC2	Transmembrane and coiled-coil domains protein 2	4199.85	7499.92	7129.36	4942.86	4919.97	4840.88	4920.71	5200.99			6242.45		3403.4	5016.94	6148.5		5226.56					8650.23		5035.08	4745.81	4783.42	7270.6	6729.54	6502.02			7051.31		3425.13		3628.63	5057.18	3761.53	5696.78	4474.08	4403.9		5335.42	3391.65	3731.03
O75077	O75077	ADA23_HUMAN	ADAM23	Disintegrin and metalloproteinase domain-containing protein 23	49094.1	55546.8	63465.1	59921.2	20969.7	37659.5	57923.5	58215.1	63493	94055.5	44926.5	72310.8	40554.5	44723.4	38993.7	91001.3	44379	55913.5	49154.9	32093.2	63655.3	63909.9	46135.9	41905.5	34245	36202.7	45725.1	48095.7	37331.2	48645.7	66278.6	28127.7	67419.3	63363.3	60985.8	56815.2	43813.8	54756.6	46831.5	42095.5	44151	54420.9	58054.4	43623.1	56183.8
O75078	O75078	ADA11_HUMAN	ADAM11	Disintegrin and metalloproteinase domain-containing protein 11	10123.6	12778.2	12552.8	10415.8	5477.74	7764.99		13570.7	12527.4	18824.9	13820.7	12160.2	7535.98	9179.09	8455.13		9717.16	17853.1	10902.2	11836.8	16169.4	13472.9	16412.3	8870.99	9331.06	8608.1	8098.31	8682.53	9333.21	12904.5	15912.7	16092.2	18603.8	14379.4	16248.4	11949.1	8939.77	13937.1	7823.69	10363.5	8745.84	10803.3	9139.87	11996.1	10532.8
O75083	O75083	WDR1_HUMAN	WDR1	WD repeat-containing protein 1	179302	188447	181102	129554	135238	146860	168922	146720	180731	149350	219575	162342	169803	131012	156533	208845	169509	176413	172260	164507	193645	202606	205474	137472	147341	128878	148570	142582	122916	169524	167893	257803	185340	190708	272723	222924	138602	141439	131746	154720	181936	178028	167713	144861	206065
O75110	O75110	ATP9A_HUMAN	ATP9A	Probable phospholipid-transporting ATPase IIA	33080.7	30837.6	24965.1	36362.7	51806.7	74632.3	78599.7	30410.7	36282.8	46265.8	35284.8	38315.4	59414.9	73642.6	76185.3	94032.9	77824	37599.7	29561.7	37796.3	40040.6	32760.8	37598.5	66005.7	79310.8	61367.3	70535.6	63395.2	73510.7	25972.4	37740.4	54709.8	38071.4	30880	33905.7	32618.4	67073.2	54206.5	78756.4	76808.4	75372	61927.7	68537.7	37179.1	34585.1
O75112	O75112	LDB3_HUMAN	LDB3	LIM domain-binding protein 3	11150.5	17825.4	12383.9	17251.8	5595.52			18702.9	12248.7		20464.2	12216.6							16699.3	10952.4	21745.1	24933.8	22182		5394.48					17770.7	13514.1		14564.6	18342	16740.6	24202.6		3647.74						10529.2	10795.2
O75116	O75116	ROCK2_HUMAN	ROCK2	Rho-associated protein kinase 2	19347.5	16494	20276.1	19319.3	21812.4	24797.6	22219.3	20984.4	23952	30043.7	19077.9	22236.9	25864.5	28938.4	25833.6	39253.9	26800.9	22416.2	17554.4	16273.9	19179.9	20043	21992.6	25586.1	23647.1	27860.1	26798.1	26538.1	25956	19680.8	18418.6	22027	21055.1	21455.3	20914.4	20024.1	23418	16451.8	35246.1	27583.2	31056.9	45544	28314.7	17787	19322.1
O75122	O75122	CLAP2_HUMAN	CLASP2	CLIP-associating protein 2	64131.4	71568.5	68079.9	64920.5	60729	57076.8	47940.5	64784	64193.1	66000.8	61266.6	51596.1	56771.7	57741.9	58848.7	111764	62626	64054.4	52324.9	54167.6	59040.8	72902.9	54816.3	50631.4	55912.6	52953.5	63986.7	62044.9	57793.1	57529.6	54466.9	59123.9	68308.2	70549.7	64067.2	58955.3	47550.9	33927.4	62936.9	60368.4	51057.8	54922	57074.7	57097.4	59669.3
O75128	O75128	COBL_HUMAN	COBL	Protein cordon-bleu			3636.66	2819.31						8800.83		3786.84	1527.91																		5192.68
O75129	O75129	ASTN2_HUMAN	ASTN2	Astrotactin-2					7519.21	6174.89	6522.41						6287.63	6276.92	6158.57		6594.71			5530.99				5927.74	6821.12	6087.09	4893.32	5645.1	6004.97			7291.97					5857.92		7130.17	5460.8	7587.88		7262.15	5425.32
O75131	O75131	CPNE3_HUMAN	CPNE3	Copine-3	75996.4	71630.1	68992.2	65773.5	45925.3	67249.8	59032.1	53815.9	70903.1	86216.3	68334.1	84930.6	72266.4	56359.2	56491.7	135115	63362.5	61551.7	54112	74424.4	62443.9	82493	55703.8	52893.8	52821.1	61252.7	56614.7	55760.2	55043.6	67212.7	77315.6	70022.1	66015.3	36769.1	82056.5	65114.2	69775.6	62233.1	55029	54927.1	42490.9	38569.3	55158.9	64608.2	81386.5
O75143	O75143	ATG13_HUMAN	ATG13	Autophagy-related protein 13
O75144	O75144	ICOSL_HUMAN	ICOSLG	ICOS ligand		14475.4	8385.08	13847.7	6381.06			10840.8			14495.7			7490.39			7561.72	15103.7	24129.3	14437.3	9620.38					10818.5					15757.1		20184.2	9433.32	8192.07		7647.95	12525.1							10871
O75145	O75145	LIPA3_HUMAN	PPFIA3	Liprin-alpha-3	24492.8	24819.8	22682.4	25425.2	31846.1	32392.5	27928	25394.3	22851.7	36372.9	23117.2	24528.5	31060.7	29568.3	29292.9	61673.6	29656.5	24470.6	25645.9	27985.2	21565.1	27369.8	21183.8	30654.2	30580.3	30720.1	37255.8	37544.2	34988.7	20718.7	21563.4	48114.7	23212.8	23265.1	22148.3	20107.3	32291.3	21393	34217.4	37325.2	33263.1	32835.8	32578.2	26666.8	23243.4
O75146	O75146	HIP1R_HUMAN	HIP1R	Huntingtin-interacting protein 1-related protein	55490.2	53713.3	48499	52407.2	45078.1	31882.5	31459.5	58000	56532.4	57651	46809.4	46732.9	40894.1	33606.5	38385.4	77382.7	28626	64962	42350.5	53532.3	45394.3	56496.7	42524	33117.1	35034.9	34164.3	26332.7	24370.5	31278	51554.4	44725.1	50628	57827	54478	60972.7	45794.8	32587.1	36098.7	28775.2	29526.2	35221	47814.8	23848.1	49628.4	45055
O75150	O75150;Q5VTR2	BRE1B_HUMAN	RNF40	E3 ubiquitin-protein ligase BRE1B	5613.82	6085.99	6152.91		4914.59						5564.4	9455.74			4606.65			6410.74	4955.32	6865.63		6251.81	4554.24	4987.88	1625.62		4304.14	5223.23	3360.13	3997.32		4372.58	5520.39	5275.78		4612.1
O75153	O75153	CLU_HUMAN	CLUH	Clustered mitochondria protein homolog	26696.5	19208.2	18742.6	24708.5	35753.6	38521.6	30926.8	17247.9	23298.1		19320.7	23395.7	34618.5	33732.6	36280.1	77495.8	25956.8	25428	25085.9	30707.1	27752.3	28374	23457.6	42585.8	33892	32895.1	39271.8	53396.3	44587.6	23774.6	27634.9	37901.9	23019.8	26936.6	21778	17915.7	37898.1	47331.9	39705.6	40514.6	32822.5	33262	37453.1	27934.7	24691.7
O75155	O75155	CAND2_HUMAN	CAND2	Cullin-associated NEDD8-dissociated protein 2	13045	12807.6	14523.6	12773.3	18833.8	17732.5	14358	15908.2	14627.5	18138.7	10465.5	13013	16626.1	16996.3	14501.3	22918.5	22240.8	15836.1	13019.3	15621.3	16358.1	14991.4	17808.8	13250.2	17503.6	16531.9	18254.2	15280.5	18288.5	15858.6	14835.9	21760.6	12490.9	9534.19	14960.6	15555.3	18131.4	11376.2	20258.1	13366	12151.3	18997	15014.8	14297.6	13288.4
O75157	O75157	T22D2_HUMAN	TSC22D2	TSC22 domain family protein 2	8218.55	5837.75	7549.73			6265.14		7245.76			6800.56		6270.9	10654.5	8086.45			6924.47	9000.17		5217.47	6530.57	5450.7		6230.41	6387.05		4433.09	9139.67			7191.74		6657.19			5069.73		6011.7	6058.51			6201.14	5569.7	6502.94
O75165	O75165	DJC13_HUMAN	DNAJC13	DnaJ homolog subfamily C member 13	10517.3	10389.7	11047.9	10625.3	9789.02	9824.79	10329.9	8505.18	11142.5	20400.2	8820.49	10162.4	10402	9570.64	9641.86	25137.2	9678.68	9145.97	10581.9	9201.88	8830.89	9561.56	9108.08	9749.84	9224.3	9377.07	9968.03	9940.54	10687.7	10440.4	9835.52	9829.13	11862.5	10240.6	10772.1	9173.02	10670.3	9672.05	11014	11595	11342.8	15471.1	10788.8	9590.24	10734.4
O75170	O75170	PP6R2_HUMAN	PPP6R2	Serine/threonine-protein phosphatase 6 regulatory subunit 2	25053.6	29050.9	30233.2	27016.3	31165.6	29984.9	31185.8	29225.6	25231.9	45517.5	25567.1	28258.1	21706.9	20581.5	30179.9	39801.6	21044.5	32093.8	21512.1	24678.9	20065.1	30309.6	20146.9	29768.5	21308.4	23053.9	29772.9	31650.3	23223.2	28455.6	25375.6	24453.4	21164.5	26467.6	24493.1	19737	26692.6	24691.3	26028.1	28891	24670.2	44738.6	27835.5	21276.4	26245.4
O75175	O75175	CNOT3_HUMAN	CNOT3	CCR4-NOT transcription complex subunit 3
O75179	O75179	ANR17_HUMAN	ANKRD17	Ankyrin repeat domain-containing protein 17						11083.3	11140.2						8295.44	7561.11			7124.41								6440.18			7056.25	13302.5			7904.66					7565.01			9370.99
O75190	O75190	DNJB6_HUMAN	DNAJB6	DnaJ homolog subfamily B member 6	22121.1	25663.4	27578.3	23336.3	16848.3	17426.3	7338.47	27984.8	26996.6	12699.2	32118.8	19852.8	12703.1	16612.1	26166.7	29003.3	10786.5	27078.3	32397.6	22712.3	29795.4	20776.5	26757.1	18000.1	11776.2	14734.7	14398.2	13152.4	14952.6	21426.2	23945.6	17573.1	24702	31108.8	30475.2	28757.2	11518.4	16606.2	17014.9	15985.8	10248.2		15988.8	18725.7	28328.7
O75208	O75208	COQ9_HUMAN	COQ9	Ubiquinone biosynthesis protein COQ9, mitochondrial	20974.7	25387.9	22462.4	20374.3	27698.9	35826.2	33825.2	20496.8	20525.8	48388.8	29006	25526.1	27378.2	25432.7	34215.2	194623	31494.4	21101.9	24055.9	29423.3	23104	24315.4	22341.4	29925.1	20678.5	26292	30563.3	33381.6	24054.3	22220.2	21019.5	38237.4	28522.9	22173.4	29649.1	22445	27597.2	48405.7	31386.3	32842.8	35394.7	55203.2	33994.2	31680.3	28165.4
O75223	O75223	GGCT_HUMAN	GGCT	Gamma-glutamylcyclotransferase	43907.5	44247	27222.1	60398.3	29407.5	23402.3	30644.5	35342.3	57389.1	36206	44604.3	54190.4	34660	31116.5	30614.2	46518.2	31087.8	51789.8	48393.4	55541.7	28723.5	32254.7	22206.4	28374.2	24509.3	40635	39748.8	39940.9	23997.7	56005.8	63087.6	23236.5	51952.7	39636.8	34452.5	32036	48566.9	33806.6	25768.7	36143.9	36978.2	40473.9	46356.9	26744.9	55564.4
O75251	O75251	NDUS7_HUMAN	NDUFS7	NADH dehydrogenase [ubiquinone] iron-sulfur protein 7, mitochondrial	41627.2	36016.3	37156.3	38500.6	77574.7	86286.8	82026.2	42756	47445.3	47468.3	54220.5	57757.7	75936.7	68260.6	80212.3	90605.8	78645.5	58649.7	41656.5	67530.8	41561.7	35223	33653.3	88984.7	69218	72482.4	89968.3	78821.6	71876.9	37136.9	57133.7	73543.7	51387.1	52565.9	45545.1	48486.2	81447.5	134068	77741.6	69208.4	95244.8	75015.2	81300.1	82539.7	42946.2
O75306	O75306	NDUS2_HUMAN	NDUFS2	NADH dehydrogenase [ubiquinone] iron-sulfur protein 2, mitochondrial	84598.9	89363.3	80175	89669.2	112635	156553	140003	92983.2	78608.7	112449	135032	80737.9	151783	148067	180407	176393	144056	104840	102962	119558	113180	89145.1	96681.6	167346	152432	146004	167034	168641	157951	107535	121838	190675	105495	100550	112616	104458	196293	214038	204159	162170	180949	122512	193698	162109	100131
O75311	P23416;O75311	GLRA3_HUMAN	GLRA3	Glycine receptor subunit alpha-3														2569.01													2419.34	3596.28	3744.51			2744.9									2426.95		2936.49
O75312	O75312	ZPR1_HUMAN	ZPR1	Zinc finger protein ZPR1	16383	17880.6	16952	15904.7	17244.3	13605.2	14219.6	12022.7	16950.1	14972.9	10370.2	15946.2	13495	9515.24	11205.2	17336.8	9283.57	14714.3	15472	14800.4	12227.5	16886.9	15040.5	15064.6	9840.88	13779.1	13011.9	14398.5	12286	15104	14195.1	13560	11437.8	16896.1	15360.1	11899.7	12233.1	10368.1	11164.4	11260.9	12745.1	14782.3	12912	13686.9	12804.2
O75317	O75317;P62068	UBP12_HUMAN	USP12	Ubiquitin carboxyl-terminal hydrolase 12	81545.2	63942.2	64862.8	66481.9		63465.4	60369.4	73475.9	70123.1	33785.1	59841	67225.4	69026.3	73483.8	61341.5		75980.5	79807.4	74476.3	79752.6	52424.9	85895.6	66614.4	62014	66758.8	95798.4	62736	82737.6	86045.3	65716.1	77372.8	65174.7	58519.1	68311.7	57810.1	69181.1	85724.7	55928.3	86974	73658.6	74278.4	62701.3	75333.4	62833.5	81369.5
O75323	O75323	NIPS2_HUMAN	NIPSNAP2	Protein NipSnap homolog 2	177739	165298	160689	165024	325158	364804	365053	213258	179861	163571	231191	193410	287477	262113	329313	562221	284429	198827	153563	199777	184472	136825	148150	298075	282383	233437	273059	254204	317806	177147	231092	389312	206422	181302	204213	195796	320442	345219	342331	326314	334344	265424	303469	258890	195278
O75324	O75324	SNN_HUMAN	SNN	Stannin
O75326	O75326	SEM7A_HUMAN	SEMA7A	Semaphorin-7A	25304.1	21350.5	28878.4	28860.2	6892.04	6697.99	7892.08	22449.5	30837.7	23085.5	23635.3	24082.3	6464.23	7942.44	5566.92		4322.3	22491.3	27102	17038.1	17955.9	24571.1	23064.2	7084.41	6588.1	10239.1	4877.09	5801.57	6771.08	24403.8	24387.5	6297.37	21657.6	26673.5	20490.2	24392.6	6371.19	19238.7	5304.77	5975.39	10843.2		5550.68	17864.7	21850.2
O75334	O75334	LIPA2_HUMAN	PPFIA2	Liprin-alpha-2	16964.7	17319.9	19679	15254.7	29676.3	29168.2	30983.8	16849.3	20407.9	16919.9	15274.9	14680.4	28961.1	28092.4	29218.4	45004.6	26403.6	15599.2	13477.2	20532.2	11992.1	16370.9	13599.8	29952.7	22200.4	27844	31581.7	33398	31135.9	13520	13403.7	30301.8	17154.3	15741.3	17713.6	11984.8	27857.4	18202.3	30593.6	31391.3	28531.1	23086.1	27725.3	18801.8	12803
O75335	O75335	LIPA4_HUMAN	PPFIA4	Liprin-alpha-4	9784.16	8974.8	6734.56	10556.7	7917.4	8707.8	8709.05	8721.93	9002.03		7524		8439.04	7032.66	7019.16		8621.96	10960.5	8864.27	9316.95	6411.97	10775		8703.28	9152.75	8080.62	8128.9	8340.2	9175.73	8781.74	9039.91	11517.6	10715.7	8369.01	9747.7	10405	7602.47	8750.14	8324.12	7626.5	9402.09		7427.43	8813.35
O75339	O75339	CILP1_HUMAN	CILP	Cartilage intermediate layer protein 1
O75340	O75340	PDCD6_HUMAN	PDCD6	Programmed cell death protein 6	62791.6	82986.1	61416.5	56454.6	52185.7	46336.4	48383.7	62678.4	65837.7	81954.3	91137.6	39568.9	53168.4	62224.7	59615.2	162759	54751.5	73405.8	57088.8	49062.7	68662.2	51185	63556.1	42780.3	72751	45236.6	54564.8	49384.9	53401.1	66290.4	55975.2	65149.4	75146.4	77024.8	72769.8	69656.7	57979.5	42328.2	64896.8	52466.1	55542.1	65207	56770.2	49662.3	81026.9
O75342	O75342	LX12B_HUMAN	ALOX12B	Arachidonate 12-lipoxygenase, 12R-type	8277.88	11110.4		21334.8	6715.42		18269.2		16074.1	38005.9	24118.2	35761.5			6473.13			16733.4	17730.7	25009.5			9904.52			15914		25152.1		26854	26788	6953.23	21792.8	16824.5		6529.31	27815.7	15513.1	8587.07	10187.2	7556.44	66876.1	24888.8		40156.1
O75347	O75347	TBCA_HUMAN	TBCA	Tubulin-specific chaperone A	95646	91555.8	111430	110745	89508.6	97570	88843.6	122904	95889.2	158766	94944.9	128265	99353.6	102667	84061.2	172116	122120	110290	115528	114233	98427.6	91820.5	95131.5	102490	83380.4	90604.4	103841	88485.3	77200.8	102233	98904.3	75188.5	111872	107063	84845.1	125247	80240.5	64494.1	91606.9	99043	83169	79141.8	96326.4	102309	110434
O75348	O75348	VATG1_HUMAN	ATP6V1G1	V-type proton ATPase subunit G 1		35977.8				59918.7	45238.1				33925.5				74689.2												53735.4	62225.4
O75351	O75351	VPS4B_HUMAN	VPS4B	Vacuolar protein sorting-associated protein 4B	131457	128327	118788	123531	95311.9	74173.2	76679.5	97115.1	95529.7	88949.3	159740	113303	86924.2	72298.9	93288.1	90672.2	78868.6	128181	131790	124641	127946	126429	123098	82090.1	65365.4	83499.3	75268.4	88172.3	73849.7	128655	123989	103335	131266	138839	140382	138021	84611	63140.6	81095.1	95607.6	80137.1	66964.3	89197.8	94101.9	137951
O75352	O75352	MPU1_HUMAN	MPDU1	Mannose-P-dolichol utilization defect 1 protein	11786.4	7769.18		12528	5159.81	11228.1	14259.5	8439.66	12320.5	13547.5	5893.73	13761.8	13289.9	14066.8	6769.21	26723.3	10504.9	9526.52	7075.89	13697.3	6421.91	8587.33	6453.34	13548.4	12742.2	12079.4	13866.4	7257.3	12987.5	8121.22	10494.9	11127.6	11833.3	10834.7	9635.22	7219.6	11046.4	14146.6	11628.7	13758.4	12639.1	12672.5	11630.2	11520.3	12405.3
O75354	O75354	ENTP6_HUMAN	ENTPD6	Ectonucleoside triphosphate diphosphohydrolase 6
O75355	O75355	ENTP3_HUMAN	ENTPD3	Ectonucleoside triphosphate diphosphohydrolase 3					15160.6	13293.9	10045.7						12940.9	17609.9	10222.3		12624.5							16064.6	13227.6	15422.6	14192.4	14260.5	12619.8			8610.71					13599.7		22091.6	15452.5	21187	13127	18920.3	5370.68
O75363	O75363	BCAS1_HUMAN	BCAS1	Breast carcinoma-amplified sequence 1	196558	182332	183756	209351	56236.9	43267.3	53924.2	237257	217100	177757	188848	181584	48523.6	69026.2	54399.4	29970.3	51977.3	222353	168579	152257	184379	207949	187797	62132	58533.9	65710	45255.2	44232.7	54246.3	159717	209020	61752.2	195165	202364	194461	230514	46658.5	124254	37106.9	51882.9	44865.6	50824.7	54110.9	206085	203230
O75367	O75367	H2AY_HUMAN	MACROH2A1	Core histone macro-H2A.1	62916.8	77162.9	78686.3	64962.9	32593.4	47674.2	56406.8	104481	55773	93460.8	82836.2	58930.1	76292.7	55384	61068.4	65513.1	70184.4	67386.1	61600.9	45014.5	87360.3	71281	82678.1	39671.3	73615.7	43501.5	40247.3	43857.4	44342.1	66391.7	77661.5	92408.5	89102.4	66831.2	78427.9	74826.7	48434.7	54045.6	50104.7	54781.7	52988	61398.5	42859.6	58296.7	67324.9
O75368	O75368	SH3L1_HUMAN	SH3BGRL	Adapter SH3BGRL	247859	271697	243085	262788	179532	148856	148907	272785	267794	235008	229601	248624	234264	206466	196115	180396	223566	279993	323697	249429	273689	235358	289384	160087	230895	196397	160041	136495	173837	310746	301514	174186	241523	235046	220494	246310	212035	214123	152402	172595	169583	117875	135883	242515	263709
O75369	O75369	FLNB_HUMAN	FLNB	Filamin-B	71918.8	63475.1	69717.4	62747.5	37313.2	31592.9	31136.3	57112	72292.5	47039.6	53217.3	71278.6	34168.1	25628.8	27822.8	75225.5	28791.8	37668	65870.2	50080.4	48546.1	54954.8	59139.9	22997.4	31016.6	32615.8	26574.3	22472.4	26734.1	52054.3	52724.8	26003.4	50926.9	62662.4	67220.3	53374.2	29137.9	32268.6	21709.1	24497.6	29091.8	44203.7	23896.9	48483.6	67918.3
O75376	O75376	NCOR1_HUMAN	NCOR1	Nuclear receptor corepressor 1
O75379	O75379	VAMP4_HUMAN	VAMP4	Vesicle-associated membrane protein 4
O75380	O75380	NDUS6_HUMAN	NDUFS6	NADH dehydrogenase [ubiquinone] iron-sulfur protein 6, mitochondrial	28798.6	29283.6	18300	26155.3	40250.8	36416.9	43608	21963.9	23731.2	30985.1	27635.7	19082.4	45284.5	35691.3	33691.1	90586.8	30983.1	28272.8	27686.4	31347.5	30106.9	27951.9	21729.8	46180.1	29125.9	31477.2	48077.7	46663.7	24034.6	21927.1	25113.8	35098.6	25381.3	24398.7	22263.4	25491.2	37403.5	38765.9	37566.6	43133.5	44199	55334.7	41908.9	37201	19876.6
O75381	O75381	PEX14_HUMAN	PEX14	Peroxisomal membrane protein PEX14		5033.31			4342.34	5937.61	5498.35			5758.34				3881.22	6292.23	11879.3	3666.14							6081.38	3955.56		5121.12	5369.28	5366.9			5809.39						3455.15	4996.92	5555.37	3803.41	10385.2
O75382	O75382	TRIM3_HUMAN	TRIM3	Tripartite motif-containing protein 3	41747.5	37864.1	41210.1	43252.5	36952.7	33113.3	33188.8	43173.7	44043.3	23800.8	39024.2	45656.7	37256.3	47471.1	40179.4	14747.1	44930.7	44509.7	44197.8	44502.8	34904.1	45867.1	39088.3	34514	49346.5	39333.2	44369.9	43049.9	43587.5	36333.8	36490.1	50705.5	39266.9	44513.9	40602.4	42516.9	38838.7	32648	44271.4	43735	37647.4	32201.7	42839	46305.2	49153.6
O75385	O75385	ULK1_HUMAN	ULK1	Serine/threonine-protein kinase ULK1		2890.53				6088.87	7653.73			6616.67			8563.92	8038.56	4197.47		8575.73				1837.39			4525.99	8499.25		7237.71	7257.22	8696.54							3705.6			5627.78	5644.02			4922.71
O75390	O75390	CISY_HUMAN	CS	Citrate synthase, mitochondrial	382610	370408	329619	344876	440830	634097	607237	406258	453288	687917	517401	404896	583181	743677	743818	1282130	634708	381817	434604	547162	503330	440168	473480	606635	702443	567008	738390	642666	704108	371132	494706	867220	569622	526663	449185	602600	735244	887066	798606	800728	846220	781499	819240	910307	469185
O75396	O75396	SC22B_HUMAN	SEC22B	Vesicle-trafficking protein SEC22b	49878.4	53711.2	50350	50950.3	76392.9	77024.5	70837.7	50319.6	42019.9	87196.8	60679.8	43986.9	72646.3	64947	67273.1	108775	64653.5	57939.3	47498.5	48964.8	50229.9	46135.6	43233.4	83398.7	58647.5	68995.2	59093.2	73083.6	69730.9	43298	44233.8	46177	44671.9	53405.8	48445.4	42686.5	77154	50347.5	68274.1	80280	75476	82054.2	61009.9	56392.8	49940.6
O75400	O75400	PR40A_HUMAN	PRPF40A	Pre-mRNA-processing factor 40 homolog A	7789.05	6609.37		7244	5022.04	7057.74	5548.84	7807.13		12544.9	4638.98		6302.59		6426.34	9448.75						7189.49		6022.23	6364.8	5409.39	4854.8	5379.94	7816.27			5970.53	6494.5				4381.08	10187.4		3820.93					5502.82
O75410	O75410;O95359	TACC1_HUMAN	TACC1	Transforming acidic coiled-coil-containing protein 1	21653.5	21848.6	21665.8	20518.4	16024.3	13974.2	14229.7	23649.2	18345.4	34964.3	18930.6	20739.7	12313.3	14363.4	14328.3		17031.6	19995.7	15997	13373.3	14562.6	24353.6	13996	14218.1	12941	12495.9	14243.3	12765.4	15014.2	15826.5	16356.8	12829.8	14498.3	20795.3	20762.3	15283.4	13578.2	10512.8	13376.1	13688.7	11987.4		12466.2	13738.2	17164.9
O75431	O75431	MTX2_HUMAN	MTX2	Metaxin-2	21815.1	20412.1	19621	26419.7	24881.6	37181.4	31710.4	22196.4	27995.1	34442.4	19126.9	18949.1	35479.9	30572.1	40322.5	57549.9	31787	23027.2	21917.5	30057.6	16933.3	20206.8	17126.8	35817.8	29487.7	31380.5	34748.8	42323.6	36859.2	22586.7	23306.6	33294.9	20182	22483.6	24478	21418.3	34066.3	36853.6	35513.9	37350.4	41208.6	27261.2	33310	32451.6	22248.2
O75436	O75436	VP26A_HUMAN	VPS26A	Vacuolar protein sorting-associated protein 26A	59279.5	57811.1	50669.6	69092	55466.9	65134.4	65590.9	47658.7	66001.1	85940.3	36858.8	61025.3	66937.6	85253.4	61914.5	131972	84160.5	38016.2	54168.8	50533	40969	47927.6	51053.8	76806.6	85666.7	66121.6	90226.2	79558.9	95496.9	52712.2	46991	61889.3	58901.4	62836.2	63804.6	63074.9	69059.3	53923.2	78597.7	80982.4	86942.4	123165	93295.6	57395.6	66458
O75438	O75438	NDUB1_HUMAN	NDUFB1	NADH dehydrogenase [ubiquinone] 1 beta subcomplex subunit 1	22618.2	42429.6	37006.1	30044.4	55160.2	61823.4	23649.2	44531			43350.2		69556	78886.5	61390.7	34558.1	70950.4	50007.6	26934.8	57684.8	51432.8		35215.7	43444.8	65319.2	69328	69208.5	77963.6	72827.7	39504.6	33360	81575.2	59548.5	61979.3	38832.3	57992.5	84467.8	40878	78962.9	80811.5	74133.6		85061.2	64660.5	51075.6
O75439	O75439	MPPB_HUMAN	PMPCB	Mitochondrial-processing peptidase subunit beta	20269.1	18490	19685.1	23914.5	34504.4	22137.2	24592.8	26311.2	21457.9	16854.9	20435.8	23595.5	28442.9	25110.1	29037.3	41047.7	20516.1	26372.5	27566.1	28163.4	21210.2	19288.7	17603.1	30695.8	28335.4	32381.8	25428.5	29409.7	26310.3	24140.9	30186.2	30575.2	24922.1	23885.5	22391.4	22525.7	35408.9	43250.6	28559.2	30938.5	35473.1	19494.6	27401.6	31171.9	24917.2
O75467;Q6AW86	Q6AW86;O75467	Z324A_HUMAN;Z324B_HUMAN	ZNF324;ZNF324B	Zinc finger protein 324A
O75475	O75475	PSIP1_HUMAN	PSIP1	PC4 and SFRS1-interacting protein	36121.2	27621.8	24640.7	30858.7	11194.2	13433	15592.8	26084.5	29493.1	54648.8	19782.1	32009.1	8313.79	13566.1	18482.2	30388.5	14265.3	18110.8	19120.9	15506.6	18037.5	26666.9	22314	11079.9	15173.7	7609.48	11004.7	11645.2	11368.6	19683.4	27145	14763.5	24743.5	22108	24898.8	22789.6	8454.7	25585.1	9020.59	11049.8	5747.31	17626.2	12148.1	18939.6	18905.4
O75477	O75477	ERLN1_HUMAN	ERLIN1	Erlin-1	13045.3	10555.8	9550.6	12730.7	9183.71	9435.22	10260.2	10517.8	10384	11868.7	12220.3	11502.8	9119.78	9541.3	9335.18	16983.8	9651.28	10151.5	9921.73	14089.9	9002.67	8433.21	8934.44	8204.34	9314.79	11188.3	7603.09	8782.54	8648.02	10260.5	11817.7	11448.9	13970.2	10501.2	9550.78	8126.26	8413.99	10133.8	9176	10056.8	9774.14		8237.57	9349.52	10588
O75487	O75487	GPC4_HUMAN	GPC4	Glypican-4			9942.86		8184.41	10321.9	9438.65	10196			8434.57	11659.2	13641	10239			9452.7						7174.99		8176.86		10528.5	10038.5	8590.2			8845.82			8674.99	8446.48	8076.56		7747.08	9653.88	10182.3				7899.2
O75489	O75489	NDUS3_HUMAN	NDUFS3	NADH dehydrogenase [ubiquinone] iron-sulfur protein 3, mitochondrial	226246	228455	195161	181499	402092	350793	299208	182865	236671	325613	241389	165591	353344	309920	329161	553989	288532	262515	228301	332311	250132	247085	215660	390840	281669	323205	390348	402279	291025	219485	307686	456458	259114	259839	261489	241555	394772	573515	492878	371615	435426	494834	448425	440217	257543
O75493	O75493	CAH11_HUMAN	CA11	Carbonic anhydrase-related protein 11
O75494	O75494	SRS10_HUMAN	SRSF10	Serine/arginine-rich splicing factor 10	21839.1	14840.8	28015.9	22811.4		21251.3	16382.4	24789.7	24580.5	46922.2	28258.4	24202.7	11937.5	18048.1	21734.2		15764.8	17547.9	23750	17078.5	36030.1	19054.2	38288.1	22027.9	18398.5	16789.5	20569.6	22281.7	21174.7	16898.9	24726.2	22166.5	27176.4	20097	23322.5	22077	14214.1	33839.8	17793.9	19286.1	20125.3	29897.9	17033.9	21264
O75506	O75506	HSBP1_HUMAN	HSBP1	Heat shock factor-binding protein 1		10918	10342.7	14962.2		8779.69	8393.93	11697.5	11427.9	10787.9		12349.2	8341.72	11637.6			11071.8	11788.6	9908.39	10751.2	14153.8	11596.5		9205.24	14692.7	8715.85	15923.8	15286.9	15656.8	9980.19		9876.91	13337.7	15328.4	15435.4	16528.9	10183.1		8715.31	9986.55	10293.1		13118.4	12936.2	12501.5
O75508	O75508	CLD11_HUMAN	CLDN11	Claudin-11	295849	223298	141882	392330	20586.7	33879.6	131318	194648	477073	153042	183019	483904	61674.8	127178	46062.8	120232	60030.3	171255	110796	149914	514221	577725	381499	99150.5	137634	71320.5	130371	121567	101370	227623	253409	139118	538158	503483	665912	567059	51958.8	192157	56538.6	94132.6	126748	89633.6	144974	297105	404555
O75509	O75509	TNR21_HUMAN	TNFRSF21	Tumor necrosis factor receptor superfamily member 21	2445.34			3659.84		3009.23						2733.52	3371.37		2892.5		3260.07		1930.91	4866.07		3305.1		2652.69		4212.99	4356.25	3399.06	3380.37		2404.53	5292.69		2657.27			2671.2	3901.05	3291.27	3788.99	3442.12		3043.51	3827.99	3059.91
O75521	O75521	ECI2_HUMAN	ECI2	Enoyl-CoA delta isomerase 2	10602.4	9710.43	12297.7	12365	13637.7	15760.4	14846.3	12964		13662.3	14247	12710.1	18309	12600.6	23417.8	56692.7	23746.4	15194.3	13678.7	13677.4	13734.4	11098.7	10418.4	16478.5	23398.3	16940.2	24350.5	17630.7	21559	12982.6	14990.3	15120.6	11041.4	10411.6	13481.8	12169	20703.4	18241.5	19541.8	17945.6	16748.6	24733.4	17631.9	22515.4	11235.5
O75531	O75531	BAF_HUMAN	BANF1	Barrier-to-autointegration factor	14587.6	13392.1	14162.1	14274.1	7207.79	5363.41	7216.8	15036.8	13938.8	16494.7	18264.7	16409.2	6111.04	4903.13	6859.22	12137.5	4930.14	7569.31	15269.9	11935.4	16181.5	12285.5	19971.5	4823.26	5409.76	7706.04	6481.7	8071.05	4848.18	17457.1	17441.1	8883.67	11085	12779.9	12516.6	13472.4	7662.2	11714	5180.41	5436.72	6398.1	17018	5541.58	13456.1	14103.4
O75533	O75533	SF3B1_HUMAN	SF3B1	Splicing factor 3B subunit 1	15893.7	15749.5	16965.3	15282.9	14516.1	12469.8	14279	17210.5	13478.5	14399.7	14503.3	16580.5	13110.8	11470.3	14817.1	28730.5	12028.9	13166.7	13797.8	14063.7	12111.2	13558.5	11613.2	13835.8	11986.7	12248.8	10334.1	10427.7	10727.9	14566.7	14799.2	14290.4	17091.7	14462.8	15210.1	13146.7	13127	18851.5	11046.3	11415.2	12756.4		10211.1	14366.1	11590.9
O75534	O75534	CSDE1_HUMAN	CSDE1	Cold shock domain-containing protein E1	33435.4	33095.4	33382.2	34178.4	31905.3	28402	29287.6	32926.6	30337.2	35360.1	32792.5	32941.3	31407.2	38931.8	36002.2	50557.5	32099.8	32621.8	36782.4	31908.9	42140.9	40678.3	39865.4	30915.6	35465.8	36170.4	32780.9	38324.5	40770.6	31973.9	33537.8	36956.1	36238.8	40993.2	33150.8	39801.2	35945.1	34772.8	39615.1	36284.2	31035.8	29101.4	39211.9	34382	40075.6
O75553	O75553	DAB1_HUMAN	DAB1	Disabled homolog 1
O75569	O75569	PRKRA_HUMAN	PRKRA	Interferon-inducible double-stranded RNA-dependent protein kinase activator A	19980.1	23068.1	15769.9		20157	33590.8	32370.7	15321.9	18554.3	37352.2	18635.2	18708.7	22021.8	23036.5	39463.4	80727	15487.7	15951.1	15040.2	20113	21138.7	20996.6	26661.8	30332.7	19904.6	17613.6	30602.7	44575.9	27141.1	15848.3	21204.6	31995.4	19765.3	20116.8	18835.1	15610.6	16647.6	44230.6	26467.6	27632.5	16321.4	48733.9	22543.6	19119.8	21127.1
O75582	O75582	KS6A5_HUMAN	RPS6KA5	Ribosomal protein S6 kinase alpha-5	10887.4	16036.3	14087.4		10035.2	4432.37					14820.5	11656.3						18669.8			17279.9	8879.01		5034.46								8757.67	17400	13172.8	15300.9								5366.27	10644.5	12970.9
O75592	O75592	MYCB2_HUMAN	MYCBP2	E3 ubiquitin-protein ligase MYCBP2	8094.42	8338.11	7353.5	10180.3	8683.09	11886.5	11861.6	8638.09	9761.67	11131.2	8950.38	8949.45	11802.7	13310.6	10727.8	17666.2	13044.7	7586.5	7785.05	8020.72	7928.15	9874.96	7974.8	11732.6	12802.5	10440.3	13709.4	14904.3	12241.8	7408.24	8753.75	7923.66	7984.24	8286.96	6814.5	7496.76	11448.1	8841.35	12762.7	12183.9	13602	16398.3	12714	7350.01	7033.57
O75600	O75600	KBL_HUMAN	GCAT	2-amino-3-ketobutyrate coenzyme A ligase, mitochondrial		8650.64				14653.3	11353																				20292.7		24326.4											27912.2	20048.6
O75608	O75608	LYPA1_HUMAN	LYPLA1	Acyl-protein thioesterase 1	59617.7	44730.7	39342	53749.3	68460.4	49363.2	43084.8	39175.5	52805.4	22286.9	66571.7	42475	39468.4	39145.5			37190.2	44428	39994.4	71226.4	36005.9	45095.1	44802	64650.8	39610.6	46847.8	34785.3	53136.4	45780	49881	58976.1	52627.9	63349.5	39703.2	49893.4	45433.8	51584.4	40298.9	47140.9	56646.9	50871.6	87985.4	40167	66759.6	58188.3
O75629	O75629	CREG1_HUMAN	CREG1	Protein CREG1
O75635	O75635	SPB7_HUMAN	SERPINB7	Serpin B7							8817.44				21365.7	13655.5						13127.3	9196.01	11272.2						15133.9		22478.2			18841.7						20437	9242.2		8570.76	12143.6	16660.2	8626.59
O75643	O75643	U520_HUMAN	SNRNP200	U5 small nuclear ribonucleoprotein 200 kDa helicase	21021.5	19111.5	18958.4	19674.4	15419.4	12847.9	14113.7	19093.2	19937.5	22528.4	16826.8	18127.6	15157.9	13296.6	13298.9	12164.6	15044.7	16094	17029.3	19419.5	16278.7	19931.9	15904.1	15086.2	14252.6	15888.1	13693.3	15081.2	15161	18519.5	20368.2	21741.4	21730.1	19818.9	20343.8	18397.8	14274.3	23353.5	13316.4	15159.8	16309.1	19207.1	13575	18400.3	18840.1
O75648	O75648	MTU1_HUMAN	TRMU	Mitochondrial tRNA-specific 2-thiouridylase 1						4986.12							5449.24											6744.43		5744.71						5655.75					5764.19		4275.88		6674.92
O75663	O75663	TIPRL_HUMAN	TIPRL	TIP41-like protein	50758.5	53171.1	49353.2	50861.1	47822.5	50675.9	46975.1	41463.7	59168.4	44280	43349.7	39148.4	41099.6	40543.1	53817.2	104704	49197.1	50050.7	42433.9	43873.1	44032.7	57645.1	45108.4	48461.2	43333.4	32734.9	53569.1	50666	50723.1	57207.6	49704.2	53803.3	63901.8	66656.7	59178.2	53622.4	47751.5	41054	51837.2	55454.3	53999.4	65350.9	51305.8	43559.3	65386.5
O75688	O75688	PPM1B_HUMAN	PPM1B	Protein phosphatase 1B	19956.9	22036	23217.2	21376.2	24938.9	25181.4	25376.1	23890.2	20888.9	21492.7	22316.4	23273.2	23644.7	24688.2	25031.3	20838.6	29542.8	23592.5	23758.4	21801	22592.8	26524	18574.3	22613.6	29837.1	19454	28954.9	23806.5	27560.5	22142.7	23107.5	18890.8	22040.3	22867.6	26561.7	22727.3	21674.1	17333.6	22039.1	25195.9	23047	14725.3	25460.5	23113.2	18188.4
O75689	O75689	ADAP1_HUMAN	ADAP1	Arf-GAP with dual PH domain-containing protein 1	25752.8	24989.3	22527	18810.3	19068	12164.9	16705	18472.8	22040.4	27236.9	34804	19064.6	17390.3	19000.6	17689.4	32161	19515.8	24841.5	25840.2	15104.6	31497.2	24579.4	27161.9	13759.3	17530.1	17412.4	19494.1	18396.9	14749	21573.2	19282.4	19760.7	23027.6	26583.8	28823.4	28332.9	22236.3	9665.37	21719	18756.1	20888.1	28400.8	20324.3	20051.4	24766.8
O75694	O75694	NU155_HUMAN	NUP155	Nuclear pore complex protein Nup155	8155.2	7976.75	7829.41	7985.99	6254.65	7387.99	8779.6	7192.29	8616.66	14007.7	5224.45	9218.24	6573.54	5923.46	6000.01		6729.39	7832.65	6061.9	8347.57	5807.52	9060.53	5178.35	9813.21	5556.42	6248.54	6552.11	7623.01	6714.79	6994.3	7423.62	7376.6	8973.3	6475.78	10099.3	7744.46	5999.43	9475.42	5787.57	6742.39	6680.14	14993.5	7460.18	8425.14	8080.09
O75695	O75695	XRP2_HUMAN	RP2	Protein XRP2	25843.2	27969.2	25361.8	26513.6	16604.6	19076.4	21035.1	19732.9	33002.8	32812.9	22472.6	28739.1	26687	21518	16949.2	65854.8	23345.9	21837	20761	22376.1	19885.8	18621.8	21147.9	18124.1	18080.3	22820.6	12721.1	14785.3	20567.2	25419.7	23313.9	11800.4	18026.5	20605.4	19802.9	19990.8	19146.6	19486.7	17792.4	16834.9	20395.6	18372	17977.1	20174.2	19695.6
O75716	O75716	STK16_HUMAN	STK16	Serine/threonine-protein kinase 16
O75746	O75746	S2512_HUMAN	SLC25A12	Electrogenic aspartate/glutamate antiporter SLC25A12, mitochondrial	176207	144703	141044	170829	268616	246701	227285	179098	167528	196391	173515	169797	264330	305650	240555	364045	245493	155949	159720	260313	195527	172261	175007	263944	274836	302288	266477	272540	277262	172073	185380	313178	193010	186714	141569	184041	335535	361342	332408	322249	331024	270408	322729	300224	164025
O75781	O75781	PALM_HUMAN	PALM	Paralemmin-1	190050	180514	171007	181032	301125	379516	353794	176889	170098	266734	166526	179652	446615	377028	364547	548275	437919	182253	171069	207784	172650	229169	148887	358567	298950	286544	412619	336297	307562	166225	127510	254175	168778	196907	171586	198020	357632	138531	359672	398918	347761	302190	369362	227057	188226
O75787	O75787	RENR_HUMAN	ATP6AP2	Renin receptor					19029.3	23213.1	24499.3			10399.2		6190.48	20965.1	21934.9	25294.1	28087.7	22088.7	14691.1		10734.9				17183.1	21818.9	19334.6	25684	25112.9	23190.5			22645.8	6702.72				21874.7	18075.8	24809.3	22679.1	20293.9	17662.3	26691.8	15075
O75821	O75821	EIF3G_HUMAN	EIF3G	Eukaryotic translation initiation factor 3 subunit G	33798.9	26080.2	28557.4	24707.5	42307	41385.2	29595.3	26380.5	30006	52112.5	20229.6	27984.3	26315.6	29317.9	36597.9	66702	27268	33544.5	27583.6	23709.1	17287.9	22698.4	20730.5	39182.9	24560	18716.5	25463.6	33026.7	35947.8	29823.4	24709.5	28127.2	25871.3	27081.8	29770.3	20816.6	22181.1	50690.7	31962.2	30051.2	18202.8	24172.6	22699.7	22688.8	26216
O75822	O75822	EIF3J_HUMAN	EIF3J	Eukaryotic translation initiation factor 3 subunit J	30669.8	33026	31812.6	32394.8	27450.5	24528.8	18751.1	33811.9	28053.3	39524.6	33467	24748.6	25583.5	25014.2	26402.4	42705.1	25485.2	32288.2	25830	33520.9	31389.6	36216.5	30221.2	23582.5	20344.1	24514.8	22517.4	20267.7	26051.4	29504	30760.2	28982.7	28815	36030.5	32457.2	37394.3	18318	27454.3	25608.4	26415	20993.5	36696.5	26417.4	33619.8	34027.4
O75828	O75828	CBR3_HUMAN	CBR3	Carbonyl reductase [NADPH] 3	32805.2	36438.3	42660.8	32766.6	45005.8	45568.7	25581.9		25081	43657.6	30889.2	35292	52831.8	45575.4	46092.9	139780	42821.2	33380.2	40498.6	25969.6	48370.7	21376.4	33529.6	44634.1	63102.2	56226.4	43787.6	32130	32118.7	36919.2	33544.4	30610.1	23946	32558.8	30324.7	24513.3	49580.2	29302.1	46809.5	39589.6	49864.6	73892.8	38444.7	25218.1	35406.4
O75832	O75832	PSD10_HUMAN	PSMD10	26S proteasome non-ATPase regulatory subunit 10	29220.5	27123	30409.3	22190.8	22322.1	24103	24233.9	21417.4	31475.1	42200.4	18261.9	28170.9	23141.9	23340.2	15625	38538.5	26318	25543.8	21909.3	34292.7	26914.7	35916.2	24281.3	28007.7	21546.8	20152.6	24674.1	30841.9	25375.1	31410	31841.2	37916.6	25234.4	30918.8	39822.7	31633.5	25861.2	26404.4	21667.1	26274.6	25470	33366.9	23041.7	25781.5	30965.2
O75843	O75843	AP1G2_HUMAN	AP1G2	AP-1 complex subunit gamma-like 2
O75844	O75844	FACE1_HUMAN	ZMPSTE24	CAAX prenyl protease 1 homolog	8867.06	7244.05	8751.63	9894.5	6504.52	10064.8	12084	9645.41	9448.31	18793	7752.87	9267.33	8429.26	10301.7	7839.46	17841.4	8755.51	7397.14	7815.31	7181.05	8846.22	8240.61	7881.78	9899.3	8363.76	8976.8	9761.48	8442.17	8636.33	6594.5	7400.73	7190.71	9634.12	8610.52	10062.8	8899.44	7185.62	8940.69	7850.9	9651.78	10915.6	13301.7	9587.64	8676.24	9498.11
O75874	O75874	IDHC_HUMAN	IDH1	Isocitrate dehydrogenase [NADP] cytoplasmic	62308.8	79826.2	72434.3	64990.4	50587.1	54488.7	54087.7	65168.4	82043.8	56521.3	79217.6	61048.3	47036	50626.4	49577.6	116954	54643.5	57278.7	60662.4	61144.6	65679.6	65769.3	51058.5	45861.3	50578.8	42819.4	45660.8	48901.5	51369.1	67993.8	73660.8	62052.6	83713.7	75476.1	81577.3	38817.2	47068.2	58604.8	41306.8	51592.7	51216.9	90520.2	24765.7	64552.5	82834
O75879	O75879	GATB_HUMAN	GATB	Glutamyl-tRNA(Gln) amidotransferase subunit B, mitochondrial
O75880	O75880	SCO1_HUMAN	SCO1	Protein SCO1 homolog, mitochondrial		10889.2			14353.5	15648	18993.5	8728.54	7610.43	16059.4			16047.2	16015.9	15914.8	29826.8	19537.7			17247.4	6864.7			17172.9	11641	11295.6	15467.7	17409.7	15913.7	12050.5	14135.9	18133.3	10530.9	7592.23	9847.41	8042.55	18030.9	16558.8	16536.3	23650.4	19404.6	23268.4	15004	12584.9	9131.59
O75881	O75881	CP7B1_HUMAN	CYP7B1	Cytochrome P450 7B1		4823.53		5655.09							4632.14		4184.02		3067.8					6403.21				4719.84			3719.15	4685.02			5021.56	5412.86		7609		6319.58	5529.46		4678.89				4370.25
O75882	O75882	ATRN_HUMAN	ATRN	Attractin					2815.56																4332.57		6348.6								5200.63	5164.33		4724.94		6047.87	5394.47		6229.92				3491.28		5062.11
O75884	O75884	RBBP9_HUMAN	RBBP9	Serine hydrolase RBBP9	15398.6	18287.6	14874.8	20886	13291.5	14464.7	14241.8	14258.5	19388.7	86471.9	21005.2	23639.5	16670.7	16217.7	21066.7	80334.3	15491	23136.2	25495.7	16823.8	36355	20746.6	28889.3	13693.9	18723.9	13808.9	17177.7	16423.5	16710.4	27722.7	21867.6	21962.9	23829.6	23253.1	25568.9	28281.8	17418.8	13684.7	18255.9	17377.5	18041.2		17732.7	18961.3	27237.4
O75886	O75886	STAM2_HUMAN	STAM2	Signal transducing adapter molecule 2	8214.77			8167.77	5810.37		7110.04	8689.04	8371.67	7982.04		9313.9	6382.58								8524.26		7231.37	7182.47		6968.64	6524			9800.93				7104.5	8664.07	9658.91			6547.04		6666.78		7036.65	8192.59	7160.18
O75891	O75891	AL1L1_HUMAN	ALDH1L1	Cytosolic 10-formyltetrahydrofolate dehydrogenase	63696.6	82026.1	91391.1	63165.1	137352	127390	106268	77629.8	64935.1	96601.5	81229.8	82355.6	121264	102686	117162	154604	163764	117020	105748	156972	91759.4	87808.8	87265.4	134264	188851	172399	140605	112491	133924	106751	103761	101128	65172.4	71419.2	86668.1	90154.4	173289	149878	90834.8	94948.3	146489	119347	128278	182673	86696.5
O75896	O75896	TUSC2_HUMAN	TUSC2	Tumor suppressor candidate 2			15864.3			22876.5		12024.3			19317.1			15843.3	19471.3			17420.6	16470.5	10723.6			11460							14363	10357.4	15454.7		13272.5		13640.5	23418.8		17042	17101.3			21860.4	13658.6	11166.5
O75899	O75899	GABR2_HUMAN	GABBR2	Gamma-aminobutyric acid type B receptor subunit 2					16036.9	17059.2	15956.8						14230	16761.4	14377.4	19831.6	12717			8746.62				20184.8	14804	16459.2	16902.1	20061.6	19949.9			18576.4					18102.7	13049.6	17429.7	18103.6	15931.2	9114.07	16572.2	11710.2
O75907	O75907	DGAT1_HUMAN	DGAT1	Diacylglycerol O-acyltransferase 1
O75912	O75912	DGKI_HUMAN	DGKI	Diacylglycerol kinase iota				5352.06																																	2881.92
O75914	O75914	PAK3_HUMAN	PAK3	Serine/threonine-protein kinase PAK 3	81049.9	71460.7	65039.2	65859.2	49592.3	62726	65327.1	82998.9	80290.7	78988.5	71516.3	71116.9	56369.5	58970.3	69299.3	73397.2	70202.4	74212.2	62238.6	59353.5	67069.3	69192.3	66153.5	61087.1	62068.5	47425.1	71355.6	59206.1	68320.7	70330.3	61263.9	81418.9	84514.8	77127.5	64727.8	69207.4	48446.3	55141	60430.2	63355.3	51031.7	63221.4	55164.4	61397	64729.7
O75915	O75915	PRAF3_HUMAN	ARL6IP5	PRA1 family protein 3	130955	143194	138447	117829	155117	151953	81194.8	124405	127514	41692.5	184087	89872.4	171317	165065	153847	126505	145412	134215	148414	132567	148354	120239	132297	179540	122793	146479	113787	141864	143666	137080	127337	146987	130986	124749	134398	130966	158477	106703	182444	143606	148812	82645.2	129981	116319	154339
O75923	O75923	DYSF_HUMAN	DYSF	Dysferlin	12204.7	12690.1	9504.63	13122.1	14493.5	13939.7	14585.4	9683.49	10792.9	11205.3	7448.67	10852.2	13235.9	10220	18652.5	21357.2	8292.2	7313.04	13215.9	15603		12776.3		17020.2	11072.3	14855.5	12901.8	16722.2	13881.1	10854.8	16367.1	22868.5	10943.7	10814.6	9113.56	12408.8	14475.6	20575.6	24976.6	16640.9	13987	15670.2	15059.5	11706.2	16331.4
O75935	O75935	DCTN3_HUMAN	DCTN3	Dynactin subunit 3	96966.7	85288.4	98400	96898.1	65211	67158.5	56784.8	88046.2	83756.8	106283	116081	74109	92931.8	123783	77127.6	21885.8	107757	115239	108442	82283.2	150149	88697.9	136226	56615.9	139608	77246.9	75239	75539.2	81548.9	105918	112636	77775.4	110540	106857	89692	122636	77904.9	50062.1	87472.7	80792.5	76622.5	30074.1	114319	108854	98238.9
O75936	O75936	BODG_HUMAN	BBOX1	Gamma-butyrobetaine dioxygenase	39226.4	39168	29377.5	40630.4	78480	44194.1	46543.5	52247.9	40923.7	136336	43844.1	40778.2	114994	55592.4	41441.9	172720	71590.9	38361.2	30550.5	47336.6	38807.9	27023.8	42357	42802.9	63245.8	53263.9	39080	29344.6	45188.1	37271.1	40163.8	35451.9	35836.9	15151.7	41134	34356.7	67114.9	40865.4	28107	50892.1	43798.3	72240.1	39419.3	44886.6	39364.2
O75937	O75937	DNJC8_HUMAN	DNAJC8	DnaJ homolog subfamily C member 8	12300.4	9296.28		12856.4	6786.39	6122.54	6318.89	11627.1	8267.96		10815.7	8862.84	9407.37	15178.5				12068.3	10891.9	9797.77		7676.07		6901.16		9682.51	6766.26	5679.41	12534.1	9465.15	9870.91	7967.52	9236.76	7938.58	10949.4	10325.2	7578.75		6030.52	8520.38	6388.91		6791.56	9847.22
O75947	O75947	ATP5H_HUMAN	ATP5PD	ATP synthase subunit d, mitochondrial	87388.6	78566.5	102622	87768.7	145187	222903	161590	101231	113719	194996	113896	96887.5	170149	223141	228235	342791	215785	98334.9	84908.1	143951	110271	84958.4	103612	168587	177411	158535	203349	163187	206807	98940.5	139121	180895	116152	143203	84987.5	148335	193123	241205	174800	206987	285058	158050	298035	184792	104584
O75955	O75955	FLOT1_HUMAN	FLOT1	Flotillin-1	74693.5	68781.9	69439	61870.3	57096.1	56416.9	49076.4	67244	81905.9	94624.1	56328.3	65245.8	65206.1	62754.1	73541.4	53931.2	47466.3	60144.5	63489.1	61902.5	64330.8	68810.1	50487.7	56370.2	56152.3	58336.1	67570.9	61291.4	49260.7	56279.3	64770.9	78154.1	60438.4	63782.5	71857.9	68594.5	60858.8	56963.7	55626.1	60639.5	67400.6	45484.9	55139.2	75216.9	83498.2
O75962	O75962	TRIO_HUMAN	TRIO	Triple functional domain protein	13859.8	13880.6	13479.9	15021.5	13886.5	17849.8	17780.7	11784.8	14920.8	28410	10374.6	12836.5	17305.8	19311.2	16526	47044.5	16864	11111.6	10528.8	13566.1	9535.32	14612.5	11503	16963.5	15788.5	17692.6	16353.8	17266.2	20901.8	12648	10756.3	15302	11662.6	14090.8	10775.3	11056.3	14532.7	12928.4	16969.3	18530.9	16970.2	40993.8	14267.2	12732.1	11742.5
O75964	O75964	ATP5L_HUMAN	ATP5MG	ATP synthase subunit g, mitochondrial	130888	143850	135783	119858	97695.8	206632	159765	135380	144453	98009.9	132537	112914	253609	258428	236318	142440	173486	112380	92158.6	232055	171678	122631	128737	157901	183751	242981	282898	181651	152555	115723	155345	216321	196578	181875	114633	201977	218002	337282	197652	274438	375739	164382	319979	289274	143474
O75970	O75970	MPDZ_HUMAN	MPDZ	Multiple PDZ domain protein	14896.3	13139.4	11717.4	14613.4	12549.7	9599.63	12721.6	14745.9	13174.7	10670.9	13932.2	11177.3	9010.61	9065.6	7696.24		8436.19	16541.5	10081.2	16205.3	12628.3	9314.51	12118.5	9694.13	6281.42	11483.4	8060.68	7824.57	7122.12	11672.2	10704.1	10828.5	11954.8	11298.1	13933.9	11914.6	8312.78	10380.9	7102.79	8993.81	9572.93	17169.8	7796.19	13396.9	11336.5
O75976	O75976	CBPD_HUMAN	CPD	Carboxypeptidase D					3501.07																3704.88				4760.91	5899.4	3772.31	1978.66	4977.49					3935.1			4534.45		4120.57	3165.51			3181.5		6004.17
O76003	O76003	GLRX3_HUMAN	GLRX3	Glutaredoxin-3	39805.9	50648.4	49155.4	51019.8	30721.6	26857.7	13746.7	45652.3	42536.1	17074.5	39865.1	34204.9	24789.4	28013.8	33771.3		24911.9	43351.7	45022.3	50444.5	49443.9	36857.2	49104	24053.7	22042.9	37682.5	27472.6	23093.6	32770.5	43025.7	40163.8	35571.7	47453.7	59461.3	43990.8	53039.7	28963.6	19577.6	33399	30422.1	31368.9		33858.9	46486.4	47902
O76009	O76009	KT33A_HUMAN	KRT33A	Keratin, type I cuticular Ha3-I
O76011	O76011;A0A140TA62	KRT34_HUMAN	KRT34	Keratin, type I cuticular Ha4															6393.02
O76013	O76015;O76014;Q6A162;O76013	KRT36_HUMAN	KRT36	Keratin, type I cuticular Ha6																				9734.11
O76014	O76015;O76014	KRT37_HUMAN	KRT37	Keratin, type I cuticular Ha7
O76021	O76021	RL1D1_HUMAN	RSL1D1	Ribosomal L1 domain-containing protein 1	5524.15			5797.8	3885.84	4193.84	3755.39	4325.34	6539.93		4551.86	6053.38	4044.29	4768.9	3734.06		5126.39	5516.34	4632.3		4500.26	3965.76	3448.96	4254.3	4177.54	3415.3		4354.11	3585.34			4469.01	5478.82		3729.57	3595.96	3446.95	5126.51	3689.11	3721.6	3814.74		4230.34	4032.03	3173.83
O76024	O76024	WFS1_HUMAN	WFS1	Wolframin	45528.8	43398.5	48374.2	53878.2	88629.9	125755	81906.8	46848.3	45068	50963.7	41762.7	47683.9	106095	108522	122601	74904.2	172145	44567.3	47438.2	68289.7	50166.6	52530.5	50135.6	78674.4	131492	104030	163986	127457	112105	42679.9	40948.5	60363.2	46512.3	41949.1	50547.6	42412.7	121990	51453.8	102550	114214	78912.7	60079.3	120150	78298.8	51957.5
O76031	O76031	CLPX_HUMAN	CLPX	ATP-dependent Clp protease ATP-binding subunit clpX-like, mitochondrial					9689.53																								5045.12									12924.5			8901.79
O76038	O76038	SEGN_HUMAN	SCGN	Secretagogin					4975.25															6636						4350.54						7554.39					4348.85				3474.62
O76039	O76039	CDKL5_HUMAN	CDKL5	Cyclin-dependent kinase-like 5
O76041	O76041;P20929	NEBL_HUMAN	NEBL	Nebulette	15592.1	17606.8	13275.4	13420.7	15222.5	21762.1	25565.2	17822.2	13803.4	12988.1	21391.8	11323	22114.8	13402.6	22380.7	51795.3	16925.3	10060.9	12587.8	14030.1	10079.4	23382.6	8427.56	16001.2	8637	12137.5	14955	16861.9	12954.9	11948.6	9517.92	17489	10222.6	12970.5	13088.9	10449	14313.9	13697.4	11210.4	15280.1	21288.4	17928.2	14570.6	12217	13046.4
O76054	O76054	S14L2_HUMAN	SEC14L2	SEC14-like protein 2	50856.9	51819.5	66070.5	64411	69551.3	59186.3	72149.9	68042.4	51045.9	95588.5	44945.7	53215.3	71034.4	54602.7	71857.2	143281	67906.9	33997.5	51540.1	65314.3	56714.7	67443.7	53819.5	52675.3	60374.6	64976.7	61289.2	60019.9	57157.3	57922.2	58262.9	55863.6	52579.9	52881.2	76441.9	54985	57932.4	66135.9	49764.3	63292.9	65308.8	66155.8	50553.9	67504.4	70862.4
O76062	O76062	ERG24_HUMAN	TM7SF2	Delta(14)-sterol reductase TM7SF2		36871.2		38329.9			23899.1								25986.4						34102.3						29587.5	30242.3		34108.6			40991.4	26416.4					31005.2	33139.2	33326.7	12458.3
O76070	O76070	SYUG_HUMAN	SNCG	Gamma-synuclein	824445	748750	744339	807444	549182	351050	331077	1042270	815352	953793	921605	617977	354277	460665	492274	1084710	392389	697661	878257	783527	921719	764948	721290	316659	438746	435398	457491	417744	498467	634992	544670	715429	746964	749605	500874	892668	354226	440413	332313	499039	327115	608403	327803	910608	762509
O76071	O76071	CIAO1_HUMAN	CIAO1	Probable cytosolic iron-sulfur protein assembly protein CIAO1	4845.29				5406.9	6286.53		3980.4	5142.3		5337.81		4103.17	6766.1	6292.79		4237.1			4559.89	4842.76				5323.81	4437.25		3649.72	3402.32			5202.05	4253.02				4985.17		5206.93	5499.08			3286.46		5313.59
O76081	O76081	RGS20_HUMAN	RGS20	Regulator of G-protein signaling 20					6385.73	13519.7	7181.06						15235.6	17664.5	6547.02	41453.1	17182.1							11643	15243.7	22026.1	17613.5	16465.4	19281.4			3972.8					13349.6		14050.6	16507.8	16394.9	12112.1	14978.4
O76082	O76082	S22A5_HUMAN	SLC22A5	Organic cation/carnitine transporter 2	6877.21	2993.58			8518.3	7320.57	7154.13	7064.91					9703.53	7466.32	7287.75		9054.06			7337.55				7230.75	7755.72	7915.98	6090.68	6380.59	9223.56		5425.13	9756.44	4217.21		5346.71		8154.52		9051.72	6476.77	8576		5202.57	6382.34	5667.68
O76094	O76094	SRP72_HUMAN	SRP72	Signal recognition particle subunit SRP72	5226.37	4617.28	6858.1	5675.86	4655.36	4958.78	5101.13	5010.71	5028.69	11020	3619.99	5551.42	3493.46	4790.46	6038.99	11031.7	3655.29	5264.59		5384.85	3955.47	7059.37		5820.24	3421.51	2134.81	5361.99	6522.62	5822.69	4539.9	6019.81	5327.75	5548.21	5408.1	6007.31	5334.52	1901.53	7141.96	4351.52	4578.81	3181.96	6736.2	4512.23	5723.35	4754.39
O94760	O94760	DDAH1_HUMAN	DDAH1	N(G),N(G)-dimethylarginine dimethylaminohydrolase 1	445896	545142	517981	404357	745446	673412	839599	481075	473426	1182650	715432	448527	704300	676978	875833	1591840	704296	627813	497055	694802	640731	428580	523065	594944	640867	552801	639471	656617	551986	579936	561740	676940	526643	496722	608422	614283	684021	601405	522763	606477	564788	916233	626677	627076	479734
O94763	O94763	RMP_HUMAN	URI1	Unconventional prefoldin RPB5 interactor 1			4730.15		9042.65		6208.08						5761.75		10431.8			17915.2	13863.9	19531.6								4812.72		5109.24	9480.96	4899.29					7964.09				4783.75				8574.27
O94766	O94766	B3GA3_HUMAN	B3GAT3	Galactosylgalactosylxylosylprotein 3-beta-glucuronosyltransferase 3		12099.7	7799.63		8511.83	9695.62			6855.73		7377.24		10985.8	7766.22	9959.85	26615.5	6213.68	6361.55		8234.05	5955.68			9688.89	9525.93	8083.71	7728.73	13046.2	8729.23	9002.25	8721.26	10029.3	10543.2	6799.2	9984.52	7162.47	11378.1	26098.6	9200.24	9473.22	9344.01	22919.3	8580.85	6177.53	10402.6
O94772	O94772	LY6H_HUMAN	LY6H	Lymphocyte antigen 6H	33042.1	27167.9	35018.2	32675.2		129582	100327	37181.9	24667.6			20213.3	102225	101249	145783		110252	64698.5	31307.7	49066.5	48680.2	35447.9	46978.8	62214.1	147522	42726.1	169693	114856	101725	36398.6	22380.9	182761	38253.3	32306.7	39576.4	18137.6	89298.2	23987.1	86071.4	101328	54702		100839	56076.1	32105.2
O94776	O94776	MTA2_HUMAN	MTA2	Metastasis-associated protein MTA2	10075.9	8129.31	7526.96	9165.93	6413.7	4626.58	4949.8	9802.97	8647.51		7445.67	11811.4	5460.38	5896.07	4928.5		5631.38	8374.46	6780.69	5947.75	9720.58	7280.5	8157.99	4774.16	6527.62	5383.07	4090.92	4851.54	5409.87	8543.03	7832.86	5997.79	8098.1	6334.98	8622.73	8664.96	4629.4	6931.17		4731.74	6019.82		4408.94	7872.77	6245.21
O94779	O94779	CNTN5_HUMAN	CNTN5	Contactin-5						3048.4	6878.75						4120.65	4379.58			3367.43							5639.96	3389.38	3220.12	4158.16		3108.85			4906.07									5639.54		4009.69
O94788	O94788	AL1A2_HUMAN	ALDH1A2	Retinal dehydrogenase 2
O94811	O94811	TPPP_HUMAN	TPPP	Tubulin polymerization-promoting protein	450891	358096	380625	385702	363674	473207	386800	507803	384166	479225	564677	412438	523715	460946	379997	539839	489388	639949	286942	323431	431396	283338	414691	481862	332546	300358	372663	293436	307607	419515	572053	363586	366518	417663	320695	421843	369380	380113	308617	349398	316009	259903	495607	380494	310837
O94812	O94812	BAIP3_HUMAN	BAIAP3	BAI1-associated protein 3					15978.7	17284	28738					8886.39	17454.1	15377.3	12840.1		22963			37792.5		6322.39		8375.75	15962.5	12828.8	31277.4	20682.1	17995			115424					13844.2		10626.2	20711.1	14990.2		11929.4	15162.2
O94819	O94819	KBTBB_HUMAN	KBTBD11	Kelch repeat and BTB domain-containing protein 11	107106	120614	112799	94781.6	171551	112659	119679	140846	101544	94591.4	139617	103122	176275	162572	103226	103260	155651	75565.8	142402	115006	145380	124147	111795	72916.8	168745	152466	103608	89902.9	114969	123385	105131	126069	109137	92835.4	111350	111140	137126	94804.9	133662	119367	131922	66554.3	101863	138056	126921
O94822	O94822	LTN1_HUMAN	LTN1	E3 ubiquitin-protein ligase listerin	9017.59	10337.5	9285.02	10058.4		6337.44	7061.17	8590.37	9750.94	11785.6		8860.55	7366.61	6765.16	7523.87	12330.1	5222.35	11860.4	9570.73	9578.48	10199.3	10088	11377.6	8572.44	5446.08	8230.66	6487.15	8090.57	5921.15	10671.1	9127.41	10051	10301.8	8139.62	8728.36	9784.64	9497.77	11807	6557.7	7540.21	6624.32	10757.4	6710.63	9135.66	9499.53
O94826	O94826	TOM70_HUMAN	TOMM70	Mitochondrial import receptor subunit TOM70	30143.1	30533.8	26421.2	37211.3	82101.4	105678	111834	37505	39393.5	59529.6	40548	42364.9	113602	136737	108688	181516	121222	31751	35706.7	55103.7	50103.6	26357.3	42174	98420.2	95837.1	117050	111867	101537	103775	30771.4	39351.5	74328	40514.7	39832	31659.2	39822.2	88392.3	66326.7	127251	131780	132098	115085	123137	57221.7	35159.4
O94829	O94829	IPO13_HUMAN	IPO13	Importin-13		6005.14	3882.37				5117.26	4791.76	6989.72			6330.45	3170.95	3447.06						5850.25		8681.77		4790.59	4089.87		4134.11	5360.92		4980.1	6597.09	3991.68		5789.61	5892.13	4870.79	3708.79						3724.04
O94830	O94830	DDHD2_HUMAN	DDHD2	Phospholipase DDHD2	35737.4	40161.7	39469.8	32491.6	25616	37920.5	32387.9	35213.9	36867.5	59873.5	35215.9	37393.9	29681	29100.9	38830.3	67090.3	31937.9	30816.4	38048.2	29379.8	33301	41465.5	42323.3	43614	33013.2	28365.5	32103.5	34670.3	36281.1	34156.3	34731.7	26469.3	33216.4	45317	40785.1	34875.8	32254.2	30481.7	40081.3	38061.6	35716.4	42674.2	34367.4	28929.3	40381.3
O94832	O94832;B0I1T2	MYO1D_HUMAN	MYO1D	Unconventional myosin-Id	224171	231841	193827	244080	60714.7	48834.9	63203.3	206149	259139	172004	196248	205361	45541.7	97075.4	57711.6	144379	57002.4	227219	193878	144110	240038	222978	258086	72668.9	82856	81668.5	50223.9	48469.3	74803.3	208103	214481	85212.4	297307	268392	239181	249996	57748.3	102604	60410.9	63063.9	55614.7	101301	71473.1	149256	269677
O94856	O94856	NFASC_HUMAN	NFASC	Neurofascin	310209	279427	221482	267518	361589	325112	319854	376805	334895	455133	548245	264863	378748	411391	341297	541674	434832	508577	321964	391425	419771	243533	354894	334412	383172	353875	330819	359432	364224	361533	363677	470177	376879	307801	324107	271930	390317	386275	368323	390646	329542	348963	350406	486885	285933
O94874	O94874	UFL1_HUMAN	UFL1	E3 UFM1-protein ligase 1	33566.7	34893.4	34041.2	36739.4	26631.1	24920.5	23966.2	33619.5	31022.5	31290.1	32718.9	28309.4	29060.9	29217.7	24371.1	50017.8	28716.3	33227.6	32644.8	35535.9	34886.4	33578.6	34840.2	29352.7	25775.5	30782.5	25296.8	24852.5	25583.4	31281.3	29897.7	29482.4	36655.7	32101.7	34150.9	32599.3	29802.2	26223.2	29331	29155.2	35480.3	34323.4	31545.7	32448.6	38034
O94875	O94875	SRBS2_HUMAN	SORBS2	Sorbin and SH3 domain-containing protein 2	13289.3	16595.1	13881.8	7573.95	27678	9908.19	10687.5	12749.7	11510.1	14796.1	10315.3		13277.7	10152.5	11061.1	22263.6	10552.7	9912.2	14054.5	15087.3		19676.9	9036.36	12413.8	8874.24	13258.3	9473.91	10815.3	12733	16415.9	14272.2	12939.7	8640.86	8715.78	8519.49	8575.96	13342.7	21476.9	10362	7821.19	9554.65	34011.6	9119.18	13526.9	7195.61
O94876	O94876	TMCC1_HUMAN	TMCC1	Transmembrane and coiled-coil domains protein 1							7323.59										6096.59												5511.14
O94885	O94885	SASH1_HUMAN	SASH1	SAM and SH3 domain-containing protein 1	5364.09	5560.31	6108.91	5368.28	4455.18	4961.17	5565.9	4603.68	6590.67		5894.42	4813.26	4010.39	3841.66			4790.32	6043.57		5574.01	4808.08			4666.81		5138.37	4456.92	3755.64	4375.88	5400.29		5140.57		6819.14	7149.54	4594.91	4570.19		3522.4	5640.48	5941.03		3446.76	5608.65	6324.48
O94886	O94886	CSCL1_HUMAN	TMEM63A	CSC1-like protein 1	43168.9	39764.1	22934.7	54515.2	17450.7	6689.72	9198.65	45207.2	36697.5	22580.1	34963	37573.4	10042.8	12384.7	7461.15		11447.9	39732.8	17233.6	25486.3	29799.6	42761.9	36578.4	10817.8	10725.5	12592.7	9889.83	6772.52	9279.53	34979.4	31803	10793	42230.6	42299.9	60227.4	31790.7	10775.8	8916.48	8894.25	10729.4	10590	17943.6	10427.4	27099.2	37584.6
O94888	O94888	UBXN7_HUMAN	UBXN7	UBX domain-containing protein 7	12001.9	12142.7	13715.7	11345.2	6753.97	10501.8	9305.17			13684.3		13367.6	8849.22		11294.8							11538.7				6970.33	7782.22					10259.1	11271.6	8969.5	10354.5				9407.33				6351.25
O94901	O94901	SUN1_HUMAN	SUN1	SUN domain-containing protein 1	3372.11	3444.26	3234.93	3283.24	3976.35														3410.46	3540.29				2998.63				4292.42			3628.62	3551.43		3204.04	3435.19	3443.03	3053.09	5660.21		3264.58				4052.28	3368.88
O94903	O94903	PLPHP_HUMAN	PLPBP	Pyridoxal phosphate homeostasis protein	37748	38849.3	36137.9	34252.9	35371.2	44564.9	44191.2	40363.7	32212.7	31954.8	41356.8	29481.6	41795.2	33633.2	37062.6	28945.8	45582.7	39985.3	31452.9	35874.2	32447.4	37649.2	27292.3	36524	31047	36357	45082.8	33541.7	31647.6	31078.1	29976	41032	34654.4	32814.1	38655	30653.7	37020.5	25539.8	36674.1	40881.2	36068.5	36129.5	32534.7	33680.1	30237.8
O94905	O94905	ERLN2_HUMAN	ERLIN2	Erlin-2	37406.5	37219.2	36895.1	33492	35286.5	28766.8	24392.4	36135.8	33914.2	30514.5	45387.6	33649.8	31360.2	31383.7	29937.5	42600.8	30375.8	35193.4	30409.1	41934.8	41455.4	24463.3	38494.3	23829.3	29794.4	35386.4	23942.6	22575.7	25781.2	32948.7	36198.2	33995.6	39287.2	34922	28854.6	38776.4	30732.1	33336.9	24390.1	23527.6	31297.7	17007.9	26776.4	33427.3	32883.4
O94906	O94906	PRP6_HUMAN	PRPF6	Pre-mRNA-processing factor 6	8183.65	7987.96	6643.58	7039.93	5822.72	4527.79	7344.71	6365.04	9850.24	22606.7	7166.13	8117.2	5762.84	3935.45	5378.24		5146.28	7045.1		7629.65	5438.54	11988.8	4743.14	6121.19	6796.69	4730.85	7124.58	5624.15	5838.38	6799.95	5945.1	6983.66	7348.97	9025.26	8492.25	6585.06	4152.78	15629.6	4087.81	4025.93	5564.03		5504.1	6270.31	6429.14
O94910	O94910	AGRL1_HUMAN	ADGRL1	Adhesion G protein-coupled receptor L1	23649.1				19831	21692.7	15064.8			11592.6			20605.5	23383.7	17906.9	23559.8	23600.5			9936.74				19274.9	19231.4	20678.2	21992.4	21385.9	20081.8			14168.6					17384.8		22600.2	19535.5	21000.7	20248.2	21081.5	8043.27
O94911	O94911	ABCA8_HUMAN	ABCA8	ABC-type organic anion transporter ABCA8	15935.6	16083.6	15963.2	20158.2	11012	4649.96	9293.59	19025.7	21272.3	10974.1	13903.5	16794.8	9038.57	8747.81	6275.2	21919.1	9174.71	17927.2	10862.1	13645.4	17303.4	16440.6	16551.4			9760.32	7548.21	6586.39		15303.2	14941.3	8734.1	20333.1	15796.6	18050.2	12571.2		13029.8	5756.67	8526.97	5607.6	28164.4	5175.38	15521.7	11944.7
O94915	O94915	FRYL_HUMAN	FRYL	Protein furry homolog-like	16631.9	12728.2	14424.1	16013.1	12217.5	10864.9	11902.1	15841.1	16447	20717	13016.2	17344.4	10496.8	12676.3	8579.2	19246.2	11228.5	15540.4	8287.89	13804.7	11354	9552.6	15174.9	11931.6	11040.9	11481.6	9365.87	7659.6	12879.7	11476.7	14664.4	9491.99	15095.2	9888.9	14038.8	12857.6	8865.79	13390.7	8968.84	9585.9	7302.14	14999.4	9034.75	14773.9	13403.2
O94919	O94919	ENDD1_HUMAN	ENDOD1	Endonuclease domain-containing 1 protein	112338	143732	139497	109960	64815.6	68882.7	64090.8	130088	141220	164204	137854	104660	65371.9	75883.2	79682	117733	63121.3	146113	138941	119575	146906	150385	144693	90756.7	87548.6	90278.9	81207.2	71855.6	72031.1	109674	128189	86851.1	150013	145153	165166	125267	65546.9	65103.9	72932.8	78013.5	77506.1	113553	72704.6	115579	154073
O94921	O94921	CDK14_HUMAN	CDK14	Cyclin-dependent kinase 14	17289.7	14987	14854.9	17468.8	14651.2	17788.8	16001.1	12005.2	16091.2		11140	11689.3	16029.6	13240	10494.2		9628.23	11457.8	14007.6	15871.3	15213.5	14786	12439.1	21911.6	7906.09	18375.9	15645.5	15648.5	18489.1	18202.1	17563	16058.4	15608.6	17842.8	17405.4	19291.4	16057.2	12547.1	17791.9	14385	15661.6	7357.11	14620.9	11606.6	18930.4
O94925	O94925	GLSK_HUMAN	GLS	Glutaminase kidney isoform, mitochondrial	69705.4	55076.3	56791.8	66412.1	126991	171467	163843	70247.5	75316.1	155059	85656.7	56277.3	157202	148502	179388	171614	142856	73225.5	70302.7	130542	73898.6	71498.7	65806.3	206913	118145	155814	173248	183221	174660	77737.8	103352	174375	106504	85282.9	85894.1	87036.3	221780	323590	174184	202983	223001	156974	205817	146026	74683.2
O94952	O94952	FBX21_HUMAN	FBXO21	F-box only protein 21		5410.18	4565.38			4030.41	3564.15	3709.89	4256.6		5100.75		5112.64	3047.27	2958.21		3757.09		5420.98	4448.84		4392.56		4617.59	3993.65	5713.04	5382.34	5820.57		4400.68		4432.08				6760.3	3945.33		4841.33	5440.19	5733.06		5761.64	4428.91
O94964	O94964	MTCL2_HUMAN	MTCL2	Microtubule cross-linking factor 2	268071	84029.1	61667.1	78055		74047.6		83714.9	79559			46929			211342			363624	122608	76511	136746	75906.1	139759			138527				135410	96557.6	80323.4	510329	290670	70265.2	111139	133154		102468	92331.6	66405.4			105519	139073
O94966	O94966	UBP19_HUMAN	USP19	Ubiquitin carboxyl-terminal hydrolase 19	12078.3	9924.82	8671.83	11315.1	7658.13	8709.15	9164.02	8377.81	9461.95	8517.56	11091.2	9929.34	10129.5	10090.3	6680.34	25976.5	8426.09	9884.66	9229.55	11894.1	9650.12	10010.1	9281.82	10250.2	6580.98	9639.32	7145.62	7555.56	9269.93	8688.53	9230.67	10541.1	11557.4	9323.47	10108.4	10284.2	8111.84	13874.6	10967	11163.2	9859.92	11670.2	8787.61	10560.4	9941.21
O94967	O94967	WDR47_HUMAN	WDR47	WD repeat-containing protein 47	15196.2	17463.5	17069.8	16122.7	33077.6	30256.9	24668.4	17846.4	15291.9	27983.7	16863.6	12211.4	35426.7	34683.9	34861.6	55080.4	38599.7	20179.8	16883	20552.4	17385.1	19855.5	14210.7	22520.3	36324.6	29867.4	37279.9	36323.7	37314	16986.8	18284.1	34235.8	17213.5	18539.3	17263	17234	39207.6	17255.3	36956.4	37663.5	37547.3	42437.2	39971	21332.1	16805.2
O94973	O94973	AP2A2_HUMAN	AP2A2	AP-2 complex subunit alpha-2	109457	121414	118666	115094	142408	197243	203456	114046	125214	165311	108591	114952	183422	171341	177842	241639	196598	114984	95950.6	116413	110041	151203	114723	193125	179349	156234	252253	234388	191396	101463	99026.6	200024	128937	133554	128357	111472	170809	116608	210585	207951	182778	222280	198576	131865	116060
O94979	O94979	SC31A_HUMAN	SEC31A	Protein transport protein Sec31A	30709.1	25809.5	29220.7	24241.3	24098.2	31044.6	27061.1	20911.3	25378.5	39007.9	25590.1	25284.6	22202.6	24783.9	27389.9	83118.6	23110.8	24707.3	24219.3	24976.3	23650	26629.6	23308.8	29431.9	21050.1	22300.1	27461.9	29751.9	27074	24593	24427.1	29070.6	30157.1	24335.8	29666.6	24656.4	21748.9	30945.4	27757.4	29565.1	23284.9	25161.1	26577.4	20601.7	24249.1
O94985	O94985	CSTN1_HUMAN	CLSTN1	Calsyntenin-1	15569.8	12842		20831.6	13574.1	17921.7	15491.2	16612.6	19689.8	15752.1	15372.8	22162.4	16512.9	19164.4	20103.9	15346.2	19524.4	18023.5	14043.1	23716.3	11659.1	12922.4	17552.7	17316.6	13620.9	15858.9	18142.5	18100.3	17270.5	16081.1	19929.5	17522.8	15093	15681.1	14644.7	13011.3	19358.5	13932	22008.7	20084.2	16406.3	14526.6	19783.6	17089.4	16926.3
O95057	O95057	DIRA1_HUMAN	DIRAS1	GTP-binding protein Di-Ras1	20897	20074.3	15190.3	13833.3	20220.9	20998.9		19691.1			24719.5		20264.5	26383.4	17784.8		19279.5	18101.8	28229.8	29142.3	32416	19525.7	23001.9	14894.2	23425.5	26605.5	21941.4	21803.1	24580.2	17947.3	19317	21527.9	20648.3	21487.3	19575.8	21906.7	27247.7	15436.4	28900.9	19687.3	24779.5		20625.2	14337	21422.3
O95081	O95081	AGFG2_HUMAN	AGFG2	Arf-GAP domain and FG repeat-containing protein 2	16806.5	12705.9	12017.1	12299.9		18994	17304.8	16195	13527.1			11400.2	17672.3	19782.4	18624	69756.6	22873.9	10925.3	12553.5	12596.4	9836.08	16650.5	9981.87	14139.1	20101.3	13222.3	21247	15757.4	21696.2		13267.6		16551.4	13944.8	17219.8		18234.5	17544.4	17271.7	16055.3	16911.9		14951.4	14114.4	19062.3
O95139	O95139	NDUB6_HUMAN	NDUFB6	NADH dehydrogenase [ubiquinone] 1 beta subcomplex subunit 6	30483	28965	33799.6	32910.2	41203	61549.1	53916.1	33971	26440	69808.5	40072.4	34484.6	55151	43994.1	60197.4	104797	41973.6	34771.3	29853.2	37319.4	32144.5	27952.1	28253.3	68973.3	29350	33303.3	55025	52963.2	41761.9	32544.5	43837.8	50846.8	36453.6	34661.9	34977.1	38020.9	61782.7	83587.6	56111.4	52914.4	55651.1	62454.6	69159	48430.2	27905.5
O95140	O95140	MFN2_HUMAN	MFN2	Mitofusin-2	13974.6	15179.7	13865.5	15201.6	24624.6	25269.5	24763.8	17345.5	17189.9	25436.3	17055.3	12458.2	25526.6	25633.7	25180.4	39876.9	23550.6	16512.1	16572.8	19136.3	14384.5	15004.6	11052.2	26161.5	22229.1	27143.1	25618.4	24317.3	28223.8	14911.4	17075.5	24904.5	18888.1	15015.8	16600	14700.5	26154.3	27164.9	28346.1	31380.1	30693	21897.1	25611.2	19522.3	15096.1
O95154	Q8NHP1;O95154	ARK73_HUMAN	AKR7A3	Aflatoxin B1 aldehyde reductase member 3	12251.4	8703.95	10217.9	10722.3	13710.6	11647.4	11147.2	11049.4	10588.4	26239.2	10110.9	12700.7	17270.8	11233.8	15813.2	29937	9578.4	8618.58	9649.38	15442.3	11558.4	12954.4	10199.9	9486.1	9564.04	11793.3	13775.6	10119	10045	7344.39	12140.5	11099.3	10458.9	8392.48	11452.6	9845.64	8308.54	27217.5	8702.94	10921.4	13268.8	14958.9	11736.3	18469.3	12694.6
O95155	O95155	UBE4B_HUMAN	UBE4B	Ubiquitin conjugation factor E4 B	3599.59					1892.96			4483.99	8350.91			1629.23		1886.55				2332.82			5829.66		2878.86			3350.76	3816.13	2825.24	3205.61			2755.56	3879.23	4576.68	3498.8		2796.91		1996.53
O95163	O95163	ELP1_HUMAN	ELP1	Elongator complex protein 1	7917.89	7137.01	6781.86	6279.37	7753.2	6224.59			7058.13		5525.42	9052.46	5850.84	9016.84	7566.77		7757.68	8667.23	7134.67	10012	5956.8			7761.67		6631.73	6899.96	7136.57	8860.24	6639.46	7413.2	8802.04	6535.22	7347.9	6115.6	5744.82	6617.23		6258.75		6828.26		6938.24	7181.35	6624.99
O95164	O95164	UBL3_HUMAN	UBL3	Ubiquitin-like protein 3	23088.8	23125.3	24620.4	19062.2	9973.91	10592.9	13915.1	25851.4	22565.9	11001.4	21636	24409.5	11884.1	12745.8	10125.4	14409.2	13119.6	21329.8	15757.5	19274.7	21586.4	27613.7	19377	13228	11112.2	12885	11735.6	11423.5	12604.4	26563.8	18388.7	13496.4	24328.6	24800.9	37465.2	20149.7	12981.5	10681.5	12032.2	11492.1	10929.7	16613.6	11170.5	16394	27204.4
O95167	O95167	NDUA3_HUMAN	NDUFA3	NADH dehydrogenase [ubiquinone] 1 alpha subcomplex subunit 3	23087.2	23791.8	24901.7	32214.9	30844.1	37702	10423.3	31301.4	15405.7		37045.8	12636.4	52417.1	35604.5	68287.7		23300.4	37201.1	39653	49755	55876.4	18526.5	56853.1	29159	45174	73916.2	56241	37281.4	24949.8	26374	25976.8	68055.4	42701.6	40304.6	41241	50598.5	59399	14621.5	81242.4	62205.5	68725.2		95561.4	92686.1	43928
O95168	O95168	NDUB4_HUMAN	NDUFB4	NADH dehydrogenase [ubiquinone] 1 beta subcomplex subunit 4	86203	75572.6	108499	94801.1	152182	112229	126973	104599	84745.5	66050.5	181665	84149.3	189780	186390	140127	366953	156868	116287	132732	154540	163889	135510	153110	105643	166847	168779	171908	152168	161452	109788	136472	208343	122540	91042.9	86115.3	113617	164351	249894	202548	151677	164182	135203	179843	216435	117634
O95169	O95169	NDUB8_HUMAN	NDUFB8	NADH dehydrogenase [ubiquinone] 1 beta subcomplex subunit 8, mitochondrial	44484.2	53602	49271	65716.1	95328	76250.7	61245.5	75103.8	57620.2		97182.4	51893.7	100250	112536	106758	102580	94340.4	83915.7	56184.8	75082.3	89857.2	62397.8	65164.5	69462.2	107138	98131.8	128356	148873	108254	53490.3	65944.4	130075	77055.6	74699.2	71451.8	77422.1	105159	81408.7	146258	106873	122874		167950	119046	73671.4
O95178	O95178	NDUB2_HUMAN	NDUFB2	NADH dehydrogenase [ubiquinone] 1 beta subcomplex subunit 2, mitochondrial					30003.8	30854.8					42310.9		37740.8	40541	43054			26247.7							37853.3		44039.6	46943	33378.7			35896.9					38088.6		58272.5	37698.3	42531		36998.6
O95182	O95182	NDUA7_HUMAN	NDUFA7	NADH dehydrogenase [ubiquinone] 1 alpha subcomplex subunit 7	37245.6	27020.8	28560.9	26545.5	33899	53080.2	43768.3	37876.2	38564.7	52105.1	36965.8	37074.4	51038.8	47830.7	46080.5	140293	51895.2	30022.7	22778.1	54729.5	26996.8	30395.8	33679.7	47678.8	36245.6	39100.2	40003	34795.2	43005.5	35420.1	54761.6	44634.5	37762.6	36643	30641.3	36861	55703.2	79803.9	47537.6	44991.7	59967.1	47460.8	55300.4	57329.4	32608
O95183	O95183	VAMP5_HUMAN	VAMP5	Vesicle-associated membrane protein 5
O95185	O95185	UNC5C_HUMAN	UNC5C	Netrin receptor UNC5C																					4427.75															2919.87
O95197	O95197	RTN3_HUMAN	RTN3	Reticulon-3	91262.9	100698	92366.6	92697.4	104677	103131	107889	86754.4	101335	127991	86945.1	89373	111962	128561	125111	295251	138801	64850.5	72434.9	85364.5	110783	104097	112927	96524.7	125160	109374	150710	122772	117062	75960.6	71353.4	118957	122237	103703	97558.1	97066.2	93216.2	70851.6	125769	124517	116616	108727	129551	90955.4	124035
O95202	O95202	LETM1_HUMAN	LETM1	Mitochondrial proton/calcium exchanger protein	25349.2	26006.1	28692.1	26939.5	47103.9	54863.3	49925.3	29268.1	26618.7	50130.1	31304.7	28114.2	52964.2	53663.6	65101.8	58878.1	56229.3	33186.2	26809.3	51380.6	26795.5	26195.7	33773.9	49782.1	48812	57948.8	69254.7	59160.8	61202.8	24375.6	31581.3	70881.5	33884.9	35608.8	33459.6	34526.5	55047.1	60415.8	55545.7	66025.7	66001.5	51962.7	64940.8	54468.5	29354
O95206	O95206	PCDH8_HUMAN	PCDH8	Protocadherin-8						9482.16							9254.7											9776.82				9113.69												6944.6
O95208	O95208	EPN2_HUMAN	EPN2	Epsin-2	23013.1	21159.9	24049.2	25531.5	8486.58	9959.26	13330.6	17465.4	20995.5	41652.2	16075.4	23186.6	9567.26	8282.71	9665.27	37655.7	8924.03	19070.9	15391.6	15215	18237.1	26327.9	15886	11431.4	7634.85	9634.08	9612.24	10818.6	7440.64	19536.8	24582.4	10508.6	21831	27123.4	24577.9	20157.8	8610.75	19597.8	9677.3	10784.3	10596.4	15484.6	10844.1	18454.5	21190.2
O95210	O95210	STBD1_HUMAN	STBD1	Starch-binding domain-containing protein 1
O95218	O95218	ZRAB2_HUMAN	ZRANB2	Zinc finger Ran-binding domain-containing protein 2	6854.72	10338.6						5346.29		5601.62		9006.22		4585.27	7159.44						5997.87	6767.64			3300.39		4699.32						6567.06	9280.7	7220.93	6031.81
O95219	O95219	SNX4_HUMAN	SNX4	Sorting nexin-4	39004.1	46835	42675.7	35901.3	24884.8	31089.1	39155.8	34553.6	45258.6	51270.9	33289.6	39911.2	26009.3	26462.8	25662.6	101600	28673.2	40548.5	34627.3	33454.4	26225.3	37828.3	30288.5	30957	32807.5	28349.6	29050.3	29323.6	30275.4	34936.1	38954.4	35082.1	40791.3	41477.7	45647.5	33731.7	27999.5	34540.7	22259.1	32096	28140.5	47860.9	25260.4	31836.3	38612.9
O95232	O95232	LC7L3_HUMAN	LUC7L3	Luc7-like protein 3	7791.27	6509.78	9497.69	5923.22	6077.17	5657.99	5757.82	8485.57	5610.2		5387.56	7911.29	4758.75	3889.71			5347.78	6701.39	5800	6392.02	6212.16	5965.32	7090.77	6018.07	2749.88	6192.08		4951.29	4760.41	5089.81	6360.67	6293.51	6211.99	7402.36	6711.31	5702.33	4009.29	6852.71	4372.39	4883.08	5079.18		4008.67	5445.25	8185.05
O95248	O95248	MTMR5_HUMAN	SBF1	Myotubularin-related protein 5	48323.7	52114.8	48123.6	49123.5	38674.6	47439	44628.4	48173.7	50198.9	61099.3	44489.6	45099.7	41112.2	40593.1	44539.7	54320.9	45415.8	51262.8	48492.5	42902.9	46944.7	50830.3	43031.8	42742.3	43243.2	38029.6	47302.4	49679.3	43218.3	49467.6	46253.2	48980.1	51209.8	50218	53965.5	43754.6	43125.2	35577.9	45375.6	46946.8	40378.5	56429.8	42050	41621.8	48802
O95258	O95258	UCP5_HUMAN	SLC25A14	Brain mitochondrial carrier protein 1						18713.6							19005.7	17232.9						21303					21805.3	17907.4	24246	17225.2	19512.4			15041.8	10712.1						16829.8	22746.3	21926.8		17699.8
O95259	O95259	KCNH1_HUMAN	KCNH1	Potassium voltage-gated channel subfamily H member 1					14304.6	10843.6	11233.6						13207.1	12855.4	11071.9	13514.8	11251.4							12881.9	12031	13385.6	13836.4	13536.3	9015.3								12216		18442.6	13140.6	16589.8	16803.6	13605
O95260	O95260	ATE1_HUMAN	ATE1	Arginyl-tRNA--protein transferase 1	8907.01	8727.01	9219.8	8280.29	7534.8	9645.31	9828.12		9388.52		6085.39		7226.72	7083.39	8771.79		7028.31	8582.4	8059.39			8708.51			6221.68		8180.34	8076.28	6852.93	6869.18		6914.32	7068.34	6813.31	9169.07		6934.93		7865.49	8631.06	7938.23		7548.13
O95263	O95263	PDE8B_HUMAN	PDE8B	High affinity cAMP-specific and IBMX-insensitive 3',5'-cyclic phosphodiesterase 8B
O95292	O95292	VAPB_HUMAN	VAPB	Vesicle-associated membrane protein-associated protein B/C	45083.5	52426.7	46920.4	53912.9	57890.1	52951.3	50808.4	45748.7	42618.3	94084.3	49915.6	40221.8	50910.4	54273.1	59751.5	177291	52216.7	39950.4	42547.8	46486.4	46406.1	52973.8	42336.1	51142.7	46136.3	49670.1	56637.1	66353.2	64085.9	42758	41418.2	56356.3	50031.3	50649.6	49281.9	46679.4	43338.9	60468.4	65775.5	58889.8	48737.2	86802.5	64688.9	54615.2	48677.2
O95294	O95294	RASL1_HUMAN	RASAL1	RasGAP-activating-like protein 1	10803.8	7943.65	8798.24	15446.9	13669.5	18268.9	23862.6	16829.4	14170.9	25305.3	22638.5	10408.5	19360.6	26701.6	17315.5	26336.2	33536.8	32726.4	15524.4	14654.4	19116.3	9660.11	16063.2	13232.2	26036.7	12894.4	24984	17661.5	26309.4	19216.6	16034	23521.2	28270.2	14945.6	15876.9	6644.91	20942.5	12698.7	24561.5	23485.1	12955.8	26691.9	16313.6	15947	11458.5
O95295	O95295	SNAPN_HUMAN	SNAPIN	SNARE-associated protein Snapin	62669.3	55322.5	58018.9	62609.6	49125.4	55308.2	44898.5	50211.3	62245.3	44698.2	33479.4	59504.3	41581.4	42745.8	51939	20278	44681	54301.6	44727	48527.4	46160.5	85176.1	40131.5	48019.9	45488.2	39275.7	54423.7	55631.8	41901	40725	45556.1	36322.9	48581	45726.1	55203.7	47161.6	31032.9	38886	37187.9	41960.7	37889.4	29245.4	41048.6	49756.2	47828.4
O95297	O95297	MPZL1_HUMAN	MPZL1	Myelin protein zero-like protein 1														1899.04			2481.48																		1804.62
O95298	O95298	NDUC2_HUMAN	NDUFC2	NADH dehydrogenase [ubiquinone] 1 subunit C2	25347.9	27414.1	27171.5	27638.8	31882.4	34745.5	43762	32860.5	23116.2	46364.5	30531.9	34292	39053.9	45255.3	36269.8	101032	35323.4	27455.4	20960.7	39296.7	35429.8	30080.2	31546.1	40051.8	36065.9	33485.5	58626.3	50234	38425	26516.7	37720.4	52402.4	36641.8	36216	39911.9	31254.9	35585.7	70813.3	53336.8	50121.5	51414.1	62080.4	62886.9	50949.2	31295.7
O95299	O95299	NDUAA_HUMAN	NDUFA10	NADH dehydrogenase [ubiquinone] 1 alpha subcomplex subunit 10, mitochondrial	67889.3	68815.3	63188.4	70465.3	150254	137786	108800	73999.9	65438.3	107089	92910.3	54861.3	126020	166755	140131	166087	157409	101214	80895.4	111514	99604.1	73500.7	78664.6	147623	137858	156280	171716	167257	153079	78396.3	99555.2	130002	97964.3	84408.2	77425.4	82842.9	153165	152492	155647	148676	187833	134726	184530	141751	69698.2
O95302	O95302	FKBP9_HUMAN	FKBP9	Peptidyl-prolyl cis-trans isomerase FKBP9		9084.96			18184.7								11710.4	11286.2	14079.8		8681.51	11957.3	13501.3	15112.9				10814.4	13211.3		9744.74	15543.8	12042.7		9846.23	12722.5					16097.6	10924.2			16195			11948.6	8719.79
O95319	O95319	CELF2_HUMAN	CELF2	CUGBP Elav-like family member 2					2987.76							2859.91	2604.61	2462.55			2611.5							2908.19	2100.46			3658.71	2669.58			3523.67			1860.22			3739.59	2285.52	2746.08				3368.6
O95336	O95336	6PGL_HUMAN	PGLS	6-phosphogluconolactonase	234329	252454	257789	218472	311739	178176	218684	268498	247783	350341	243983	240896	243843	191476	188543	356713	224111	267237	262446	207465	287590	250168	257099	167242	204998	198554	175981	184007	174980	259093	223168	178260	240585	215298	291210	272969	194211	171049	197934	176038	185806	265758	175552	216748	272768
O95340	O95340	PAPS2_HUMAN	PAPSS2	Bifunctional 3'-phosphoadenosine 5'-phosphosulfate synthase 2			4370.44	3897.94											2209.31		3436.54	3570.08	3786.86	4735.95				3490.26	3442.19	4884.28		2481.24		5883.28		2924.7		3900.06		4877.82	7267.92		3120.54	2634.6	4250.75		5137.52	4090.07	3795.55
O95352	O95352	ATG7_HUMAN	ATG7	Ubiquitin-like modifier-activating enzyme ATG7	25832.2	27248.4	28125	24121.9	16614.4	21274.9	25552.8	25141.8	28319.4	26328.1	25819.9	24089.9	19061.5	20782.3	21314.4	19864.9	20325.5	21892.3	24650	18630.6	24266	31292.6	27364	20519.9	24000.8	19838.1	20876.1	20636.9	23921.8	25961.7	25592.7	24535	31545.3	30203.6	31897.5	28429.3	22009.6	21011	22556.5	22314.2	21079.9	25106.9	23606.3	22650	25972.7
O95363	O95363	SYFM_HUMAN	FARS2	Phenylalanine--tRNA ligase, mitochondrial						16077.6	18581.5						18376.3	11458.7	13246.8		13608.7			12487.3				16456	10885.8	18741.1	14683.2	16048.4	11647.2			17658.4	12933.4				19917.7	15406.6	21351.8	17667.7	21124.4	25026.9	15730.5
O95372	O95372	LYPA2_HUMAN	LYPLA2	Acyl-protein thioesterase 2	19909.4	14549.5	17572	16474	23492.4	18972.2	14895.3	19168.2	13324.2	25118.4	27113.7		19421.7	22700.1	26079.1	16222.9	24595.2	23489.8	30225.2	22156.7	37317.9	20335.4	48379.9	15028.8	25478.2	19531.8	20537.1	20848.6	23564.6	17150.8	22784.3	25938.4	24606	29164.9	24598.1	27172.3	24632.9	10038.1	24544.5	20310.4	22395.5	20764.3	27141.1	29233.3	29936.3
O95373	O95373	IPO7_HUMAN	IPO7	Importin-7	43500.5	37758.8	33822.6	43955	26678.4	30063.3	32717.4	37983.9	35239.1	47710.8	33849.8	35037.4	36316.2	43084.1	32898.5	69402.8	33103.6	30919.1	29792.3	41681.3	46047.5	42829.3	43609.8	30574.6	36943.5	36915.8	34886.2	35026.2	32496.8	40095.3	39512.5	51203.2	42444.3	44568.2	41482.7	46652.7	34439.4	35184.3	41011.7	39974.9	37951.5	57512.8	39377.1	46523.9	47193.1
O95376	O95376	ARI2_HUMAN	ARIH2	E3 ubiquitin-protein ligase ARIH2	5133.77	5429.41	5524.98	6204.97		4410.34							4094.31	3167.73	3440.79			5157.72		6313.52	6216.4	4533.06	4960.34	4151.47	3607.5	6306.45		3722.7	4301.76	5147.31	6430.26	4769.74	4367.06	5832.64	5492.1	5956.98	4824.22		3605.46	4615.95	4476.26		3915.53	5857.53	6326.91
O95394	O95394	AGM1_HUMAN	PGM3	Phosphoacetylglucosamine mutase	43247.7	54627.4	43452.9	55567	49382.1	35828.4	31466.1	52570.7	45081.4	43878.1	88882.9	35382.8	48428.6	40830.3	41828.2	111401	38728.4	73818.9	66959	51391.2	88698.2	50053.3	85149.3	36357.1	40919.8	43461.1	38786.5	46702.8	37743.1	57095.5	55048.3	57929.7	69520.4	69871.1	64937.4	64416	45075.6	28303	48298.6	43447.5	43458.3	53943.3	43709.5	60315.6	73749.5
O95396	O95396	MOCS3_HUMAN	MOCS3	Adenylyltransferase and sulfurtransferase MOCS3	6320.54	7821.14	6831.15		6340.28	5904.49	7259	7378.88	6765.57	9111.21	5697.85	6946.69	8608.68	6434.64	5491.97	14425.6	7684.31	6027.59		7008.61	6178.12	9776.91		5774.96	7659.53	6801.42	7572.53	8244.33	5770.03			6456.12	7003.46	7860.53	8044.03	6188.65	6512.3	6679.49	5328.76	6989.97	6981.01	10795.4	6193.4	5898.17	6679.65
O95400	O95400	CD2B2_HUMAN	CD2BP2	CD2 antigen cytoplasmic tail-binding protein 2
O95428	O95428	PPN_HUMAN	PAPLN	Papilin																	4424.8								8083.12
O95433	O95433	AHSA1_HUMAN	AHSA1	Activator of 90 kDa heat shock protein ATPase homolog 1	93192.7	96259.1	89164.7	83012.7	82960.6	60204	61550.8	116704	84868.9	58882.3	96841.6	72954	76338.7	96174.4	65430.6	45232.8	82409.6	99725.6	101242	98956.1	117791	80770.8	136212	62952.3	73739.6	92830.1	61874.2	60430.8	74698.5	105213	91836	95888.8	106843	133371	86380.7	125984	69706.2	73562.3	90821.6	76158.7	81753.4	68819.3	80602.1	103097	115024
O95452	O95452	CXB6_HUMAN	GJB6	Gap junction beta-6 protein							2679.5									6836.44								2850.79			6858.29	4569.95				6715.63					3254.95			3788.09	4378.26	6833.03	3742.72
O95456	O95456	PSMG1_HUMAN	PSMG1	Proteasome assembly chaperone 1	10177.8	11177.8	10798	12743.7	9074.34	9018.68	7032.33	10012.5	9206.13	9374.64		9018.64		8654.29	9927.93		8860.4	9225.48	10198	12866.9	9883.09	13087.8		9105.26	9649.12	7703.62	9896.07	9607.97	8001.53	12867.5	11867.2	10698.4		8484.01	9662.5	8644.46	8059.77	12012.5	6937.79	6906.84	5148.74	12169.7	7124.22	10709.7	9069.24
O95466	O95466	FMNL1_HUMAN	FMNL1	Formin-like protein 1	5518.45	5679.46	6475.37		5368.97	3866.77		5814.44		7845.96		7117.19	4872.61		4605.38			6232.36	6584.93	6508.99			6381.83	5478.14						5718.32		5915.16	7085.81	4998.48	5340.39	5704.9		7407.86	4132.96		4957.3		3562.93	7326.98	5651.3
O95470	O95470	SGPL1_HUMAN	SGPL1	Sphingosine-1-phosphate lyase 1	11575.8	8145.4	10182.7	12470.4	5053.58	7499.27	7548.73	6480.78	10556.9		8244.1	9354.34	7094.37	5784.65	8910.21		5314	8609.21	8328.1	8805.93	7157.36	10482.1	8599.26	6754.39	3476.44	5528.2	7192.18		4445.15	10103.8	6759.68	6148.52	10458.9	8623.56	9180.25	7925.53	5478.1	3877.56	5224.15	5771.12	6647.63		5591.59	7447.02	10877.9
O95476	O95476	CNEP1_HUMAN	CTDNEP1	CTD nuclear envelope phosphatase 1
O95477	O95477	ABCA1_HUMAN	ABCA1	Phospholipid-transporting ATPase ABCA1					2268.13	4779.41	4882.55						5179.62	4550.44	4548.69		6405.71							4287.68	5162.87	4645.69	5873.37	4226.62	4605.12					3065.66			5857.59		3835.89	5397.89	4134.37	8354	4702.07
O95479	O95479	G6PE_HUMAN	H6PD	GDH/6PGL endoplasmic bifunctional protein	6736.77	8911.54		6833.74	6573.01	3735.25	5644.62	7784.99	6238.07		6322.23	8156.33	7004.13	5454.44			5292.99	8802.97	7747.74		6247.14	5806.68		7203	7170.31	7301.4	4184.72	4541.7	3814.4	7136.23	8369.98	5346.08	7812.06	6602.21	7239.66		8169.33	7732.42	5327.1	5836.51	7436.83		4510.42	6037.16	7256.29
O95486	O95486	SC24A_HUMAN	SEC24A	Protein transport protein Sec24A		3908.94	3262.8			3008.43	4544.48	2892.06	3012.63			3513.86	3119.03	2857.14	4201.63			3157.15		3229.79		2280.73		6202.62		3080.37	3729.31	4639.38		3426.39	3889.27	2447.69		3009.47			3465.42	4119.05	2894.83	2915.86	2819.97		3216.44
O95487	O95487	SC24B_HUMAN	SEC24B	Protein transport protein Sec24B	9949.97	9765.17	9782.79	9545.66	8964	10362.9	12733.4	9180.38	9334.64	12130	6601.17	9599.59	9383.63	7979.9	10575.5	41376.4	7379.87	9204.77	6720.13	8231.15	5688.35	9915.84	6684.65	8919.18	8376.56	8040.31	9166.98	10359.6	9147.93	8338.99	8981.52	8144.99	8178.07	7001.74	9135.14	7159.22	8238.08	12302.2	8316.94	8525.57	7512.93	15255.4	8155.27	6469.91	7353.12
O95490	O95490	AGRL2_HUMAN	ADGRL2	Adhesion G protein-coupled receptor L2					10231.7	11702.7	11921.4						11499	15520.1	8746.47		10303								9278.02	12133.7	7365.71	10729	11194.8								16477.8		17495.7	12211.5	12940.1		17046.2	9420.25
O95502	O95502	NPTXR_HUMAN	NPTXR	Neuronal pentraxin receptor														3630.48			3530.54								4032.4		2832.17
O95562	O95562	SFT2B_HUMAN	SFT2D2	Vesicle transport protein SFT2B																							10130				20002.6	15230.1							19306.6								12255.4
O95563	O95563	MPC2_HUMAN	MPC2	Mitochondrial pyruvate carrier 2	18072.2	21270.2	16136.4	21326	12859.1	20778.5	26441.9	14560.2	21344.2	29405.3	19828.8	17791.8	21230.6	26261.1	23136.7	112890	24527.8	14881	14225.7	28749.5	19275.6	19072.8	18989.9	23433.5	27161	18441.4	35263	32565.7	30764.2	18806.8	17548	35444.6	26361.8	22036.3	27367.4	22054.7	33111.3	32229.2	35736.6	44566.6	41238.6	39891.7	32250.2	38564.2	20541.3
O95571	O95571	ETHE1_HUMAN	ETHE1	Persulfide dioxygenase ETHE1, mitochondrial					17991.2	19330.2			9957.49					6576.78	14820.9		8443.12	10510.4		10509			10009.2	16874.7	11977.7	10477.7	17719.9	15486.4	7907.61	7049.94	7352.68	12282.2	12511.7			8697.25	15642.3	14690.9	13552.2	17848.6	20896			10876
O95573	O95573	ACSL3_HUMAN	ACSL3	Fatty acid CoA ligase Acsl3	17212.4	21597.4	17894.3	18470.5	25524.5	29021.3	25888.2	14615.6	21374.2	33121.7	16827.1	19902	25928.5	24289.8	25702	61166.5	22172.7	16718.1	14601.5	22294.7	14407.4	19333.6	13353.3	32504.6	21061.5	23093.8	28599.5	27383.3	26887.2	15389.9	18781.7	23386.7	19899.2	19799.7	18646	16133.6	24237.1	25662	26421.4	28071.8	29024.3	26247.5	25232	20802.8	18964.7
O95622	O95622	ADCY5_HUMAN	ADCY5	Adenylate cyclase type 5	12995.4	13877.8	13742.3	11818.5	44804.1	53101.4	42612.2	10323.7	15045.9	28070.2	11638.8	15329.8	58341.7	57996.9	40218.2	94191.2	54302.9	17885.3	12418.5	12040	14097.5	12055.7	14537	62663.9	53346.6	51594.9	54374.5	64499.3	56117.4	15214	13142.5	14198.9	12800.3	12124.8	12699.7	10804.6	57015.2	11077.6	73090.3	59497	65060.1	57301.7	58558.3	12032.9	9209.41
O95630	O95630	STABP_HUMAN	STAMBP	STAM-binding protein	19260.7	22145.5	25111.5	19974.6	10733	9075.5		20504.2	15326.2		21942.6	17018.4	11441.1	11664.1	12611.8		11251.3	17180	18795.6	12807.5	16939	17345.5	17452.4	7921.64	13354.4	12653.1	9815.6	9985.9	11837.3	23902.6	17306.8	10636.9	17990.8	20168.9	18164.6	16283.7	11757.6	10820	10148.6	10744.4	10268.7		10178.1	13579.9	16729.2
O95631	O95631	NET1_HUMAN	NTN1	Netrin-1						3376.1	5609.39								4586.03		10534.9										2851.47
O95670	O95670	VATG2_HUMAN	ATP6V1G2	V-type proton ATPase subunit G 2	126196	144777	169811	147513	166164	179251	156364	150952	172560	120185	165426	118474	141804	117784	146011	166182	144054	145917	110560	127442	122492	141410	125577	148067	109366	116221	144565	167478	123694	136828	170510	175600	116102	156523	129345	121343	127376	141480	143003	138906	135549	84953.6	132631	139794	136859
O95671	O95671	ASML_HUMAN	ASMTL	Probable bifunctional dTTP/UTP pyrophosphatase/methyltransferase protein	23537.1	21524.1	23770.7	22402.8	17971.6	17291.5	18881	23585.1	27392	14464.5	21690.7	25554.1	19951.7	15656	13462	16140.1	12568.3	13054.4	24598.8	23171.9	23108	21950.6	15230.5	13534.7	12480.5	18944.3	20977.2	17382.1	10386.5	19930.8	19760.7	16462.5	15808.9	18159.6	20118	12603.7	17020.2	17118.5	10638.6	14960.6	15038.4	18955.1	9981.05	10456.7	19413.3
O95674	O95674	CDS2_HUMAN	CDS2	Phosphatidate cytidylyltransferase 2	22095.6	18367.1	21433.1	21764.9	62421.3	42698.6	47662.9	16759.6	24190.2	40890.8	24752.4	30892.3	35652.5	39199.8	51044.8	97588.5	27761.7	22404	31848.9	26889.3	27905.4	24279.3	22002.9	48010.9	37878.8	38280.2	50273.2	46440.1	33913.7	22184.1	23593.1	43148.1	30175.9	28250.7	23659.6	25372.2	39563.5	30706.8	48029	57152.5	38877.9	59845.1	41062.4	22580	22548.9
O95714	O95714	HERC2_HUMAN	HERC2	E3 ubiquitin-protein ligase HERC2	7231.83	4992.24		5034.47	10537.1	5374.27	8434.18	4454.07	6206.26		7905.59	5936.14	10152.7	10040.3	6194.55	18702.3	7235.61			6987.17	5465.31	7869.37	6318.97	13210.3	9138.19	5569.61	9014.28	11108	9869.14	4814.08	6575.31	8791.83	7862.4	6086.72		4095.8	9329.34	8558.68	11864.5	9521.63	10419.9	13394.3	9101.1	8016.38	6883.53
O95716	O95716	RAB3D_HUMAN	RAB3D	Ras-related protein Rab-3D					67491.3	44277.7	79762	17737.1			20160.3		101313	106020	60135		115211	18501.6		44846.4	27585.9			90687.6	101758	81458.9	76155.6	77356.8	124653			81906.3	19028.8			16777.2	102743	36275.6	104862	100838	87131.8		104455	47767.3	19840.2
O95718;P11474	P11474;O95718	ERR1_HUMAN;ERR2_HUMAN	ESRRA;ESRRB	Steroid hormone receptor ERR2
O95721	O95721	SNP29_HUMAN	SNAP29	Synaptosomal-associated protein 29	36301.3	39616.1	38250.2	35006.9	31852.3	37297.9	26036.4	37135.3	29061.5	34328.8	26746	30064.4	41880.2	31448.9	32781.4	53060.1	32698.5	33686.7	24922.7	31998.1	25375.2	33852.4	23609.5	34941.3	28775.4	35840.8	28878.6	34374.1	35812.5	32928.5	28692.4	27585.2	29329.5	38316.5	30049.8	27799.2	35486	22312.1	32050.1	36517	41094.7	32769.1	35178.8	31705.5	27050.5
O95741	O95741	CPNE6_HUMAN	CPNE6	Copine-6	215860	269653	235589	288445	495498	608002	527915	328860	315315	373173	303319	291416	655880	569917	687251	537201	694928	268987	237665	295394	271350	275047	242986	467800	556599	502175	573812	506885	593960	221133	275383	379702	259508	228961	224628	234986	425910	318708	612005	515405	656852	523366	603590	351461	264187
O95747	O95747	OXSR1_HUMAN	OXSR1	Serine/threonine-protein kinase OSR1	77818.9	68398.5	69483.1	71163.9	55387.1	44515.6	53401.8	70264.8	66676	64376.6	70229.3	69037.8	58044.5	65865.6	39859.9	47884	63509.3	84267.5	72693.7	66979	91580.1	91245.8	85301.5	52331.4	73244.5	60795.4	58940.6	63177.1	55075.1	74141.6	64952.9	61106.7	85374.4	80442.3	81320.9	77185.2	60365.3	46442.7	66186.6	61125.3	63636.5	78661.9	60257.6	79925	87510.6
O95749	O95749	GGPPS_HUMAN	GGPS1	Geranylgeranyl pyrophosphate synthase
O95757	O95757	HS74L_HUMAN	HSPA4L	Heat shock 70 kDa protein 4L	93309.5	89439.5	80493.7	92928.6	96946.8	101936	97889.4	91010.3	83400.1	103660	95846.7	66314.8	98152.5	103571	98112.8	132678	96233.1	89125.3	81167.8	137441	99091.3	90494.8	92068.8	106868	88278	101431	99160.7	94582.8	102283	99082.3	93497.2	142002	91693.9	101245	86922.7	94899.2	93355.4	84543.2	98619.5	109343	85879	92901.8	92417.7	119315	90698.6
O95772	O95772	STR3N_HUMAN	STARD3NL	STARD3 N-terminal-like protein
O95777	O95777	LSM8_HUMAN	LSM8	U6 snRNA-associated Sm-like protein LSm8	25787.9	29868.6	20637.2	16467		15641.4	16295.7	23195.6	22188.7	46672.2	17282.3	15625	19134.6	17412.8	16091.3	57976.7	20884.8	26700.1	21576.9	25756	23270.6	19742.6	19201.7	17921.7	14404.8	14595.7	17905.4	15906.1	14599.4	25747.5	20814.3	18527.6	28360.5	19936.4	22605.4	24136.5	16487.5	22807.7	17568.5	20691.5	18912	49179.5	14619.6	17171.3	24135.9
O95782	O95782;O94973	AP2A1_HUMAN	AP2A1	AP-2 complex subunit alpha-1	275288	279181	282300	308211	253225	358576	335268	304424	304596	303677	298252	288899	383006	413201	337232	515641	380143	262436	249434	297095	317363	366206	308517	335068	399387	361477	467034	445332	426393	325620	316441	440635	344594	358558	355754	314177	399595	325486	442671	416019	393947	391879	472686	382734	339696
O95793	O95793	STAU1_HUMAN	STAU1	Double-stranded RNA-binding protein Staufen homolog 1	6971.73	8417.42	8807.4	7666.18	9427.3	9455.05	4837.16	6809.45	7786.32	12872.2	5617.3		5634.23	7359.59	8924.76	13308.4	5041.35	6519.2			6806.45	6943.05	6616.28	8558.8	6079.13	6232.88	6560.17	7867.59	10356.4	6900.26	6698.28	7603.91	7192.43	6759.5	6971.17	7550.03	5206.62	7451.21	7189.21	7145.46	5217.54		6782.85	8527.44
O95810	O95810	CAVN2_HUMAN	CAVIN2	Caveolae-associated protein 2	10741.9	8296.05	8838.62	7368.57	12782.9	10799.6	11350.6	9335.7	10343.8	20677	6245.58	11090.4	9611.37	9024.03	7311.28	25825.5	10115.9	7098.04	8310.93	9579.92	5818.05	7984.85	5521.77	14689	10364.6	9761.75	12976.3	8971.16	8947.35	6627.42	8081.49	9401.57	6787.54	8445.35	6259.59	7003.43	11161.9	10739	9789.83	10259	12586.8	15119.8	9407.8	13689.8	7252.16
O95816	O95816	BAG2_HUMAN	BAG2	BAG family molecular chaperone regulator 2	19666.6	19381.1	17219.4	22302.5	21797.9	19332.3	17811.3	22097.7	17909.7	31770.6		21384.2	12233.6	16944.6	17134.2	31665.4	16523.3	23210.5	18493.4	26007.2		20396.8	21342.9	18154.3	16716.8	20125.6	16694.2	17000	16224.2	22270.2	21658.9	23738.3	14765.7	16754	13927.2	15155.5	19799.1	14361.8	15836.8	14621.8	19134.9	18293.5	13751.3	17846.2	16639.7
O95817	O95817	BAG3_HUMAN	BAG3	BAG family molecular chaperone regulator 3	31563.3	42842.9	59067.6	34814	25093.2	28558.6	22072.8	36012.6	25681.9	37092.4	36500.1	31739.8	33256	19537.2	28662.1	86363.1	26691.3	30295.9	46299.7	35380	35730.8	42979.4	27702.1	24612.2	27571.8	27944.7	22379.4	18926.8	27855.5	45427.9	33716.6	26884.6	25458.3	35040.6	25047	39604.6	29852	28731.4	22255.1	20840.6	26525.3	33214.1	24520.9	33535.6	36221.7
O95819	O95819	M4K4_HUMAN	MAP4K4	Mitogen-activated protein kinase kinase kinase kinase 4	18069.6	18509.2	16419.1	17377.1	9362.11	8240.89	9480.92	17637.6	17455.6	13660	11517.6	17026.1	10807.4	8533.8	7065.78		9599.6	16538	13716.3	16942.9	15024	21487.1	12685.9	10265.2	10940.6		8734.61	9302.41	8517.47	17192.3	19985.9	12790.3	15705.3	18374.4	19580	14223		11893.5	9671.16	10148.2	10499.2		8489.27	15423.3	16496.7
O95822	O95822	DCMC_HUMAN	MLYCD	Malonyl-CoA decarboxylase, mitochondrial	16437.2	16456			24399.2	20584.6	27129.7	15387.6	20983.1		20998.3		27915.7	32483.3	25752.2	126427	29957.2	19762.8	16911.6	30191.7	21937.4	25978.8	20172.2	26172.7	30502.7	28040.8	30863.6	30138	28909.3	16363.5	20139.7	31073	19554.2	17961.3	23269.8	18032.1	30426	29955.8	29872.8	32614.1	33711.2		31766	28835.7
O95825	O95825	QORL1_HUMAN	CRYZL1	Quinone oxidoreductase-like protein 1	7585.05	6845.94	8103.85			6133.39	9562.73	8770	7245.93				6531.66	6055.01	7909.5		7300.19	8471.05		6291.1	6961.21		9732.95	5874.5	6267.91	7994.84	6192.94	5797.67	5505.93	7276.63	9484.68	7156.02	7461.06	7516.68	8235.18	7149.66	6864.28	4106.37	6045.78	7639.53	7276.89		6939.7	5894.74	7101.88
O95831	O95831	AIFM1_HUMAN	AIFM1	Apoptosis-inducing factor 1, mitochondrial	32447	34612.7	36234.6	35589.1	71016.3	43291.3	49079.3	32120.8	33978	36790.5	39212.2	32063.3	49416.4	51398.7	55592	80904.9	52842	34947.9	38151.5	45213.3	36894.3	34519.9	35682.4	53286.9	53504.4	53145.5	55546.9	53646.3	57034.7	32573.5	43057.1	64717.1	41719.6	38571.2	41163.8	37895.4	63477.1	70872.4	61708.7	62998.7	70097.5	48846.4	63581.8	58516.4	35108.9
O95834	O95834	EMAL2_HUMAN	EML2	Echinoderm microtubule-associated protein-like 2	37893.7	44343.3	32933.3	39069.7	67666.8	44094.9	27787.1	21438.9	25776.9	74652.5	42441.8	27875.3	33541.8	30930	53489.4	63190.6	23368.4	36582.8	48893.7	69463.4	37334.8	34787.2	41246.4	41347.4	33849.6	48697.2	36212.4	40769.3	33519.6	49175.6	36328	46084.2	55501.7	51740.5	38526.4	43971.4	67741.8	39536.7	48835.3	55593.3	44605.1	55167.9	41518	59062.3	66251
O95837	O95837	GNA14_HUMAN	GNA14	Guanine nucleotide-binding protein subunit alpha-14
O95847	O95847	UCP4_HUMAN	SLC25A27	Mitochondrial uncoupling protein 4					18800.9	25823.4	30914.1			17207.3			18329.2	27065	30080.3	56127	29657.2							18435.4	34548.7	21588.4	26008.6	44359.7	30962.4			24874.8	6242.44	7908.53			38798.8	12574.6	33909.1	28925.7	36044.4	24222.4	25134.8	10796.3	9968.15
O95848	O95848	NUD14_HUMAN	NUDT14	Uridine diphosphate glucose pyrophosphatase NUDT14	28758.7	27035	17842.4	32430.3	22653.2	16459.5	20264.2	22018.2	31169.4	22642.3	32937.1	26375.8	23244.9	24662.1	13207.5	23463.2	17515.4	25162.8	22415	23132.9	33296.8	26937.8	24247.3	16316.8	17407.3	16528.1	19117.3	18090.3	15980.6	29768.5	34927.8	14379.9	29536.2	25315	26578.4	17765.4	22951.8	20630.9	12969.6	22330.6	19940.9	12723.5	13958.8	28383.6	30598
O95858	O95858	TSN15_HUMAN	TSPAN15	Tetraspanin-15	38923.1	41791.3	47898.1	69600.4	12149.2	12710.5	25689.6	51049	43754.7	25282.9	39295.1	48746.2	16928.7	28928.2	15463.9		17553.3	52870.5	51388.5	39165	75993.2	64573.6	62872.7	18351.6	26454.1	23904.1	15882.4	21436	18240.6	47197.1	41936.7	29610.1	53957.4	41868.9	58819.4	55699.7	15100.5	21066.7	20309.8	16535.6	18745.5	18112.3	23848.2	59008.7	65823.3
O95861	O95861	BPNT1_HUMAN	BPNT1	3'(2'),5'-bisphosphate nucleotidase 1	50633	47655.2	46126.1	46554.2	38633.4	49497.5	46135.3	50445.1	53281.8	58610	55041.3	50617.9	51984.8	54453.4	39919.8	105482	56599.6	38691.9	43706.1	45495.9	60459.6	50179.6	49093.6	37481.3	54475.6	37852.8	53066.8	45696.1	47500.1	48722.8	42873.8	38687.4	55616.6	47415.7	56295.2	49509.4	41575.9	52369.5	49779.6	47831.8	46694.8	64538.1	46482	44102.9	45588.2
O95864	O95864	FADS2_HUMAN	FADS2	Acyl-CoA 6-desaturase
O95865	O95865	DDAH2_HUMAN	DDAH2	Putative hydrolase DDAH2	116755	122388	130806	90763.4	53785.5	65854.5	68632.2	106199	174909	112297	94255.6	119391	73527.7	66496.8	44571	149168	75169.3	100468	144010	75745.2	94530.4	135750	104603	59911.6	83080.8	49541.8	57507.1	53423.7	59931.4	132164	105312	81950.9	103739	124817	158957	121729	65519.7	75167.1	63586.4	48332.1	56074.1	80393.3	56054.6	69196.3	155857
O95870	O95870	ABHGA_HUMAN	ABHD16A	Phosphatidylserine lipase ABHD16A	28536.8	26288.3	37696.5	30152.8	46352.4	46113.2	37038.9	26100.7	29277.8	43914.4	27156.7	28568.6	53791.8	48943.2	41138.2	39046	47100	25713	24550.3	30275.1	24744.8	25586.3	24378.1	47187.8	41629.7	54070.6	50829.4	49688.8	47731.4	22386.3	25336.5	36633.3	31301.2	28215.2	36628.8	28660.6	40721.7	27484.6	55342.2	53798.8	57196.5	44377	50024.2	32386.1	37067.8
O95881	O95881	TXD12_HUMAN	TXNDC12	Thioredoxin domain-containing protein 12	31956.4	31479.1	23260	27437.5	35526.2	24007.5	38620.4	26087.3	25696.8	30704.4	28695.9		26625.5	29599.2	37826.3		34485	37001	31684	39985.5	35129.5	33615.9	30351.9	27997.8	36711.5	27327.2	35909.1	34148.8	33740.3	41380.5	41075.1	36267.3	41372.6	30230.3	38370	33899.7	40447	38888.2	30226.2	30988	36569	34001.1	43597.3	31412.1	37428.5
O95886	O95886	DLGP3_HUMAN	DLGAP3	Disks large-associated protein 3					9292.89	8858.25	11170.1						9270.66	10941.5	11705		10934.7							12285.3	10167.6	9574.06	12286	14960.1	12044.5			11651.8					9051.41		10283.6	11128.1	7583.41		11659.8	7417.14
O95969	O95969	SG1D2_HUMAN	SCGB1D2	Secretoglobin family 1D member 2								17236.2			37569.4							49914.5	58094.9	49439.9						46649.2				63047							67963	20477.5
O95970	O95970	LGI1_HUMAN	LGI1	Leucine-rich glioma-inactivated protein 1	36968.9	36970.3	47492.2	54650.7	61931.3	80914.7	53449.3	56615.1	35206.1	38683.8	45306.6	37137.7	102074	109567	70139.5	63703.5	106725	59387	59565.9	74985.5	77524.1	42576.2	69929.4	93085.7	97450.6	111022	93498.2	85323.8	94392.1	43811.3	59265.6	88974.1	48881.5	52460.5	42496.3	60462.3	113154	57665.2	124287	95427.1	116430	55955.6	128678	65016.6	52205.2
O95977	O95977	S1PR4_HUMAN	S1PR4	Sphingosine 1-phosphate receptor 4
O95989	O95989	NUDT3_HUMAN	NUDT3	Diphosphoinositol polyphosphate phosphohydrolase 1	79794.6	71294.2	56678.1	79889.7	55219.2	71376.8	45916.1	100620	73499.8		81168.4	54611.2	90825.7	77383.8	73772.5		84113.1	73861.3	74112.8	74530	112199	72681.5	97146.7	55474.5	57876.8	75176.7	85255.7	86525.1	59856.2	82525.1	92592.4	62234.1	77131.7	83896.9	71814	83471.8	72508.1	59256.2	77969.1	82931.4	82914.4	19307.6	90775.6	75712.9	76304.2
O96000	O96000	NDUBA_HUMAN	NDUFB10	NADH dehydrogenase [ubiquinone] 1 beta subcomplex subunit 10	180868	149946	168600	191794	252605	319957	254181	197020	202274	211844	149041	156980	303572	271931	255817	259723	286358	158232	150552	251896	156655	145142	139224	266430	246385	317116	331077	274983	278721	126163	192239	246434	178973	176532	159636	154347	260322	422381	260096	278950	306972	123072	299363	321898	162230
O96005	O96005	CLPT1_HUMAN	CLPTM1	Putative lipid scramblase CLPTM1	14742	13173.8	10102.7	15412.3	14157.8	16472.7	16664.3	9299.51	15080.7	29428	8161.72	14085.4	16211.3	16522.2	11673.8	31686.6	13360.1	10585.6	8728.71	13788.5	10707.6	13539.3	13678.2	20235.5	16190.8	14143.2	18276.4	18987.2	16462.3	7939.37	13689.7	13192.3	12603.8	13389.4	13893.2	9679.2	14283.4	18185.4	15158.9	15743.9	20699.8	19719.5	16114.3	12357.3	13677.3
O96007	O96007	MOC2B_HUMAN	MOCS2	Molybdopterin synthase catalytic subunit	21974.5	16604.7	22265	13274.8	10170.5	24078.8	20102	10539.6	18178.9	22499.7	13400.7	16866.6	19132.3	12459.2	17154.2	19186.4	19070		15674.3	16780.5	15642	26436.5	12333.7	23160.5	19067.9	17646.9	19369.7	22365.7	17901.5	29172.1	19942.2	20437.5	15240.6		27423.6	14834.3	22611.3	21483.8	15476.4	18757.8	14780.6	26450.6	17536.2	12492.1	20884.7
O96008	O96008	TOM40_HUMAN	TOMM40	Mitochondrial import receptor subunit TOM40 homolog	10901.8	10216.4	10442.7	10325.8	16923.6	19024.1	18058.2	12223.9	14213.1	19094.1	10929.3	8385.73	15504.6	17824.2	23011.8	27383.5	13574.8	9734.59	7918.99	15094.3	10414.5	10127	10118.1	15973.8	18188.7	16155.3	17053.2	20274.3	19909.3	11452.6	11407.6	22108.8	13235.4	12428.1	12531.2	12275.4	21151.5	14653.9	18554.9	21295.6	22368.8	25733.1	18393.7	13895.5	10481.9
O96011	O96011	PX11B_HUMAN	PEX11B	Peroxisomal membrane protein 11B	15316.2	14339.5	10776.1	17597.8	15296.9	20156.3	25479.6	11292.9	14780.7	15648.8		16411	23277.1	20887.4	19239.2	39596.8	19401.1	11292.2	7556.82	17614.6	14204.6	14508.2	13593.1	21868.3	24514.8	17299.8	25262.2	28886.8	26344.9	15617.9	17767.8	23383.5	17847.3	13310.8	16195.2	14640.5	25443	23388.2	23855.5	25969.8	25909	21114.2	29393.6	18552.9	15590.8
O96013	O96013	PAK4_HUMAN	PAK4	Serine/threonine-protein kinase PAK 4	14605.9		19609.4	13862.1	15364.8	9736.02		13907.3	10516.5		17216.3		12592.5	9991.07	12255.7	34394.6	8131.41	16132.2	13732.3		13735.8	12736.7	15395.9		9591.49	13972	11662.4	11360.5	10950.4			13044.8	15128			13994.3	12482.1	11141.3	16032.2	12474.9	13286.7		14110	13103.8
P00156	P00156	CYB_HUMAN	MT-CYB	Cytochrome b
P00167	P00167	CYB5_HUMAN	CYB5A	Cytochrome b5	33105.5	30788.4	28820.3	24215.5	22257.4	30250.4	20761.1	30051.1	32609.1	24068.5	24457.7	26954.6	24213.6	23474.6	30428.4	47833.9	19954.2	28793	29146.3	22996.8	32255.4	41137.1	26969.6	30585.9	22180.1	17903.7	25933.5	28062	25256.2	29072.9	23457.7	22210.5	28524.9	30406.1	37361.8	26294.2	23478.6	18719.5	24690.3	27465.2	22434.7	48099.3	23301	23219.4	27729.4
P00325	P00325	ADH1B_HUMAN	ADH1B	All-trans-retinol dehydrogenase [NAD(+)] ADH1B	8230.25	6457.83							5166.24								5535.17	10555.9	10721.2		17672.7	5896.33			7061.31					6421.96			11288.2	4200.75			5607.12			6185.56				9863.34	10306
P00338	P00338	LDHA_HUMAN	LDHA	L-lactate dehydrogenase A chain	507720	502490	633655	509395	421742	547236	578194	592691	627397	855510	673537	627060	595616	607467	690830	1342630	643041	488986	400788	350779	552138	430985	555468	545433	499924	460624	598575	518915	540709	585312	603238	469850	564680	679167	501439	627386	555154	639047	606000	565432	674267	591947	760479	502603	570398
P00352	P00352	AL1A1_HUMAN	ALDH1A1	Aldehyde dehydrogenase 1A1	120086	94151.5	105698	93686.6	268895	423293	414917	102473	115978	125895	117474	109551	290406	264215	244163	520734	134834	97004.6	76861.5	151490	98231	72195.6	64126	459271	156064	189734	243629	283573	342992	120749	118145	84106.3	80295	59418.2	74013	121026	326352	123345	224491	218305	316964	213269	276716	109793	77788.5
P00367	P00367;P49448	DHE3_HUMAN	GLUD1	Glutamate dehydrogenase 1, mitochondrial	510741	500655	667261	498430	1052090	1265550	1304870	645423	550426	746878	771540	624153	1313310	1050350	1704690	1983180	1154420	594784	655833	913319	601944	615421	742302	1114030	943198	1006130	1204860	1210100	1213660	522984	1050660	1550780	685047	589226	773572	670892	1080560	1611250	1174010	1267880	1270770	958853	1326340	1003760	693774
P00387	P00387	NB5R3_HUMAN	CYB5R3	NADH-cytochrome b5 reductase 3	417044	459107	473329	410416	414134	449741	510764	389074	477693	557787	427590	362636	391984	439347	444580	1076740	464844	334549	421235	377550	337027	451875	376952	431119	438777	308860	412869	360006	441961	440552	475943	377549	442710	389114	471731	431844	437849	547896	391080	445441	340515	468899	384506	413128	478484
P00390	P00390	GSHR_HUMAN	GSR	Glutathione reductase, mitochondrial	48537	52238.9	50220.6	43627.1	72999.3	61106.6	50000.8	50134.9	49265.2	77551.3	58236.9	43893.7	73526.2	74904.6	71338.7	165728	85881.4	55755.6	49155	56218.7	50579.2	45963.8	56342.7	63703.1	58679.1	61042	72280.8	66109.8	65813.2	57491.1	48196.3	52926.7	53516.8	49550.7	45496.2	53414.3	75598.9	47986.3	67452.7	67895.3	69230.2	78853.5	72306.8	55527.4	25173.3
P00395	P00395	COX1_HUMAN	MT-CO1	Cytochrome c oxidase subunit 1	18922.3	11893.6	12309.6		8440.57	23988.3	40496.9	11758.4	24651.4	18399.3	13773.2		29239.4	35503.9	24716.6	15684	25527.8	11902.9	11951.7	35062	34279.9		24873.8	29688.6	44144.5	27971.3	60984.2	44650.3	42791.5	18553.4		41806.8	32782.8	24040.5	36079.7	30960.9	37068.5	44757.9	46539.7	41897.2	45279.6	40199.3	62581.5	39973.8	27633.7
P00403	P00403	COX2_HUMAN	MT-CO2	Cytochrome c oxidase subunit 2	183161	157673	151221	223978	137798	353232	358235	179783	171376	235014	194330	134995	335916	380189	338570	256475	321506	151324	181381	320203	210523	258191	200790	376670	397615	323054	462081	380132	494583	153892	164432	454943	246215	217631	249623	203302	300166	497407	461153	429812	392311	434040	390014	430516	233180
P00414	P00414	COX3_HUMAN	MT-CO3	Cytochrome c oxidase subunit 3							8987.47	4121.01						5669.77											3992.47		8440.59	6323.01				4588.53			3926.84	3976.71		9040.03	4405.58	7950.47		31445.3	6506.87		4065.77
P00441	P00441	SODC_HUMAN	SOD1	Superoxide dismutase [Cu-Zn]	357617	272429	245773	300133	174600	275236	303571	423962	428666	379178	421543	403747	325217	260828	381872	470478	357128	266837	223432	202170	232339	129378	244119	228683	188654	181289	266942	198121	231380	305547	676252	137812	297355	252930	200554	407464	227760	488516	184392	262902	288119	212235	348563	281384	279387
P00450	P00450	CERU_HUMAN	CP	Ceruloplasmin	34627.3	15934.9	28377.7	18699.6	10159.4	20724.4	20976.2	27547.6	21697.4	20565.7	26812.6	31918.8	18336.8	15515.9	16710.4	52773.7	25436.8	20374.8	28256.8	23693.2	17873.8	21123.1	27444.5	24288.6	21362.9	19462.1	15978.6	18468.8	24308.7	32199	29980.9	33330.5	28243.4	19597.7	19432.9	28795.2	28049.3	33608.1	36290.1	25896.2	27898.5	42813.9	27804.3	36694.7	34246.9
P00488	P00488	F13A_HUMAN	F13A1	Coagulation factor XIII A chain	9290.11	7507.73	6731.15		14975	12489.2	12094.5	9328.06	9299.79	11287.4		7883.75	8986.13	8982.67	10346.2	22977.9	7787.64	7755.68	8274.82		6365.84	7860.52	7930.14	9371.37	9527.77	9779.57	9962.59	8649.3	14861.8	8560.36		8323.09	20259.7	9992.77	8225.86	8125.99	10850	7961.18	10363.4	15763	23116.9	15157.3	8996.26	10621.4	7253.11
P00491	P00491	PNPH_HUMAN	PNP	Purine nucleoside phosphorylase	48801.4	37532	43202.5	40824.2	30409.2	43020	42067.4	31417.3	44676.4	59067.3	36690.7	55951	42635.3	40915.9	35629	74160.4	51307.7	28666.1	28909.6	47141.4	25720	32654.6	27973.1	31969.9	41963.5	48311.9	39195.9	31873.5	42039.5	39476.9	43465	40708	30833.9	27374.5	40091.4	33577.1	40592.4	38868.8	34027.7	33921.1	41342.1	60041.2	42039.2	40231.1	41904.5
P00492	P00492	HPRT_HUMAN	HPRT1	Hypoxanthine-guanine phosphoribosyltransferase	393477	347369	349928	397441	457633	412511	389194	386860	424365	465109	375637	361520	473285	490926	421249	641863	507131	342013	339785	312983	415461	360941	381302	399759	483015	394774	487551	394555	420573	430805	405504	373823	450773	452420	305887	407822	397326	322546	488627	434812	430645	532723	516038	368020	381983
P00505	P00505	AATM_HUMAN	GOT2	Aspartate aminotransferase, mitochondrial	583943	505707	553541	439141	677754	1112640	940145	526197	617748	876755	721197	555810	930804	839791	959242	1318220	952489	569723	502835	797830	543341	561361	583441	983221	784871	624412	1038320	917110	948295	609473	719385	1159630	628504	771700	518170	835949	1034960	1295320	1023310	888861	1090120	650107	1156190	1162050	635463
P00533	P00533	EGFR_HUMAN	EGFR	Epidermal growth factor receptor	7729.28	6820.39	8064.05	9743.82	18928.4	28904.5	27108.4	9643.46	8167.66	28805.8	6683.6	11687.6	29666.1	22309.7	24955.8	49526	21741.3	8528.52		17406.3	14191	8116.33	11930.8	19251.3	19757.5	24527.9	23529	21147.3	20968.9	8436.96	8442.39	35197.6	8386.25	5742.53	9543.05	8077.2	30074.9	17538.9	26803.5	27387.9	28743	30528.8	20853.1	23019.8	10870
P00558	P00558	PGK1_HUMAN	PGK1	Phosphoglycerate kinase 1	1560300	1279280	1666690	1380910	962539	1540520	1420660	1721560	1840530	2793250	1356370	1902070	1375440	1361480	1623820	2118600	1577410	1243080	1214040	1163250	1080010	1301120	1220430	1215880	1281870	916730	1353990	987430	1177590	1549890	1742080	1161590	1448970	1843980	1347940	1721540	1095670	1673820	1135760	1136660	1080290	1217220	1613350	1659730	1490190
P00568	P00568	KAD1_HUMAN	AK1	Adenylate kinase isoenzyme 1	173090	201214	207383	155915	183651	181987	177927	202921	159851	194249	160402	159668	266795	142904	132535	334748	215535	152273	205705	185692	142955	169905	150126	160097	184379	161407	145436	138772	128176	166016	173866	152887	142569	157300	144949	175643	152397	132248	128070	143489	150471	202198	159722	199177	167705
P00734	P00734	THRB_HUMAN	F2	Prothrombin					7363.43						5653.18			6278.95			8833.74		7478.65	15780.3					6898.14				9667.76			10809.1	12684.1						11987.6					15850.3	11966
P00738	P00738	HPT_HUMAN	HP	Haptoglobin	248238	72474.1	256245	152820	91740.3	120641	171816	237957	216734	93226.6	180998	226538	137929	143442	71874.3	176732	196816			172150	96676.9	97241	155211			113658	115707	101899	139700	106607	279830	138957	202223	73095.5	54418.7	107709	123129	457689	188324	192713	155726	271939	109526	252372	188792
P00751	P00751	CFAB_HUMAN	CFB	Complement factor B	15655.6					4554.85	6602.95	6435.42	6526.19			5498.71		4346.41	3138.56	16032	4493.97			6003.67		4075.95		2447.91	1734.77	3653.71		5012.77	4566.04	6350.3		7560.07	7903.19				5170.04	9431.55	6669.22	6588.58	3705.48	12750.1	3650.78	8600.02
P00813	P00813	ADA_HUMAN	ADA	Adenosine deaminase				6390.73	8250.61	6724.31	11213.7	11757.7		20422.7	15087.5			9467.94	7810.72		9242.25	19369.2		18797.7	7736.17			11819.1	6076.15	8301.63		6976.25	6475.77		10909.1	7630.91	14911.2	11584.2		6900.76	6455.62	13246.5	5335.24	9799.43	8052.9		7218.06	11964.2
P00846	P00846	ATP6_HUMAN	MT-ATP6	ATP synthase subunit a		16105.1	16356.8			54084.5	53992.6		21767.2	33091	18450.7	17509	30194.9	51358.2	41018.5	24687.7	51872.4				27514.1				51353.3	19512.6	68880.9	45001.4	54891.6			60429.4		39084.8			57558	61964.6	55069	52020.4	67080.9		71629.9	42153.4
P00915	P00915	CAH1_HUMAN	CA1	Carbonic anhydrase 1	146218	82387.9	139624	106754	100663	130492	138011	133511	126824	105783	202693	296064	80559.9	132672	146138	253598	155929	61389.6	194742	258193	97673.1	109474	94552	133158	187851	287933	113168	104012	81403.3	103171	152199	95406.6	81223.3	67685.6	94802.8	241806	109953	129968	129757	115168	161245	140849	268859	244953	96510.7
P00918	P00918	CAH2_HUMAN	CA2	Carbonic anhydrase 2	338415	365064	273455	314414	231606	165238	217606	451534	321478	403680	391430	443519	242245	199832	207084	479313	230490	330137	211815	278408	268711	247943	236816	200840	178098	218989	166275	135746	161726	241262	477367	168225	365038	372336	380397	357700	158875	486113	164014	192330	224777	283866	194049	256700	404717
P00966	P00966	ASSY_HUMAN	ASS1	Argininosuccinate synthase	27158.3	40184.2	41454.4	30402.8	37524.3	40775.6	35476.2	26743.6	35905.8	79146.9	52952.6	33417.9	34916.6	47049	39622	90933.1	60568.5	43384.1	52418	53149	43760.4	36198.5	57462.5	20969.2	68739.1	52902.6	39618.2	29927.8	35851.3	23841.1	47768.1	72581.5	24311.2	22495.3	42498.2	37523.3	31640.8	34013.6	36937	37200	25157.2		42145.3	33689	49046
P01008	P01008	ANT3_HUMAN	SERPINC1	Antithrombin-III	18795.5	9998.27	19231.8	11163.6		13277.6	15777	17771.3	13423.3	13347.8	10340.9	14606.8	12269.6	10826.5	11755.2	8648.78	16981.9		19458.3	19567.1	5494.54	15115.3	12550.6	14541.9	14283.1	11771.1	11752.6	16955.1	22122.3	9656.93	17031.5	11767.3	14942.4	5591.06			9648.91	24620.2	16082.8	15623.1		22912	7469.21	18752.4	14863.1
P01009	P01009	A1AT_HUMAN	SERPINA1	Alpha-1-antitrypsin	153456	45586.5	112299	112368	59509.2	74810	109934	98102.9	120974	80167.7	78095.4	106308	61750.5	128378	62184.4	99478.4	116893	60128.9	68223.1	148019	38685.7	53693.7	89742.3	75079.9	55065.7	130189	43768.9	54465.6	105705	146752	149250	122358	167518	83794.8	42451.5	91575.9	169330	194814	147171	181032	143146	176902	85857.2	48423.9	145658
P01011	P01011	AACT_HUMAN	SERPINA3	Alpha-1-antichymotrypsin	138853	41874.9	144030	65184.6	32475.7	82830.7	61222.1	63842.1	99706.2	62483.4	27489.5	78167.1	48374	87482.4	26451.3	66159.5	130026	22196.1	57973.7	74474.3	28802.1	48720.4	61967.8	30838.7	56119.3	69768.4	26547.4	40997.4	82468.2	74904.4	102119	58657.8	57609.6	41186.8	28426.7	65439.6	84164.9	150069	58048.4	59345.6	55571.7	62126	73617.7	110278	90612
P01019	P01019	ANGT_HUMAN	AGT	Angiotensinogen	31588.8	23427.8	33280.7	26000.7	27993.6	25925.5	28057.9	20991.8	26706.7	45816	29733.6	28386.8	22446.9	21141.2	29004.1	28643.3	23512.6	29329.2	38140.5	53334.1	30709.7	25123.3	22822.4	25886.8	25635.2	51313.1	25510.6	27823.2	24544.3	27923.9	31214.3	24150.9	34406.5	20426.4	24141	31552.2	29027.5	34568.1	26539.7	31069.5	37627.4	36583.9	19235.4	32765.6	24099.2
P01023	P20742;P01023	A2MG_HUMAN	A2M	Alpha-2-macroglobulin	116053	73641	77972.8	54000.5	49830.1	44400.7	57929.4	94233	86203.1	78955.4	81005.9	66409	55681.2	57459.6	56045.4	128204	62922.5	47957.1	63066.8	100881	39154.6	62663.9	41760.9	59778.5	70696.9	59660.6	39833.5	53327.7	50843	92310.9	96014.6	87669.6	90874.7	61585.4	36444.7	81562.4	69836.7	106904	96607.3	61513.6	80307.6	135524	84078	106459	66359.4
P01024	P01024	CO3_HUMAN	C3	Complement C3	86723	39459.2	57966.3	53067.6	31941.3	41611.7	60357.6	56754.4	67013.2	51548.5	43676.6	58514.9	37418	53062.8	36974.3	91238.1	63595.2	35183.6	33303	72227.2	34485.6	52521.7	53608.7	41756.6	31885.3	44625.6	35464.7	50765.2	55809.3	81969.5	86330.2	83111.1	88837.8	59727.6	32155	54583.6	67826.2	85701.2	89556.7	66029.4	64148.4	89021.3	60937.7	90909.7	76875.6
P01031	P01031	CO5_HUMAN	C5	Complement C5	12068		7309.34	5127.52		6423.25	8312.42	9761.51						4852.05	5773.6		8411.22			11763.8		10438.9	5435.22	6005.21	5642.79	6327.48	4110.05	7880.32	8449.84	6182.24	8717.71	6657.38	7435.22				5012.36	11791.1	7619.97	7515.91	5886.97	9320.83	6466.31	17164.7	9987.27
P01034	P01034	CYTC_HUMAN	CST3	Cystatin-C	108395	117790	75712.3	119536	147840	136512	122358	106966	106229	189994	76685.8	138657	146504	118210	111181	175470	137763	123982	144447	151230	78826.1	73849.8	49934.5	149570	104722	181769	100631	95766.4	121008	92491.2	81362.4	127414	82474.9	58223.2	91304	67513.7	113433	96969.3	121070	133105	110134	171931	77967.3	134172	57946.1
P01036	P01036	CYTS_HUMAN	CST4	Cystatin-S																		10709.7	16315.4						104661	20025.4				13132.3							138237
P01037	P01037	CYTN_HUMAN	CST1	Cystatin-SN
P01040	P01040	CYTA_HUMAN	CSTA	Cystatin-A	40091.4	34922.8	67400.4	76193.1	29697.3	28148.1	73114	66561.9	60679.5	59797.2	236566	91007.3	23194	18183.9	40388.2		9464.82	120031	120484	108068	51585.9	58069.7	55233.3	21804.4	42905.2	95464.7	19069.7	243864	20832.9	117227	104901	66168.7	94072.2	82919.2	31077.7	44758.2	133159	69684.1	49767.1	55345.2	62077.4	112482	98574.2	14815.7	119274
P01042	P01042	KNG1_HUMAN	KNG1	Kininogen-1														13101.3			22633.4						17562.2		23526.4				28474.9									34081.1	19615.4	18792.4				29146
P01111	P01111	RASN_HUMAN	NRAS	GTPase NRas
P01112	P01111;P01112	RASH_HUMAN	HRAS	GTPase HRas	41741.6	36038.1	39189.7	39612.8	47751	68699.4	39585	49643.6	37453.8	105067	57019.1	49671.5	82860.3	100545	78342.5	140101	107676	54713.8	62189.6	42286.7	63034	33425	44819.7	65308.4	80976.6	83007.5	90245.8	67665.4	79528.3	46797	41430.3	55937.4	47125.9	51287.2	36001.1	56468.6	85986.3	27521.1	90921.5	86304.5	76334.3	59789.6	101740	54225.7	55127.1
P01116	P01116	RASK_HUMAN	KRAS	GTPase KRas	115670	129282	112784	117863	110388	106862	79095.3	119797	120847	143229	142607	110494	112405	81145.9	86846.2		102428	127725	139425	116772	154592	108724	171097	67612.8	86728.9	88650.8	109287	117011	80667.1	111101	139905	144933	118141	130965	135919	138462	85375.2	76065.4	112309	103599	95934.2	121472	105641	123619	127890
P01210	P01210	PENK_HUMAN	PENK	Proenkephalin-A					15954.8	17339.8	14689.6						20101.1	18831.9	10817.7	35077.3	12139.3							10554.6	17963.1	18868.4	45487.8	26711.2	17691.5			10767.3					13661.7	13234.4	12321.5	34805	52929		15749.9
P01213	P01213	PDYN_HUMAN	PDYN	Proenkephalin-B		14936.4			97617	170514	106303				263067	97643.5	201765	193084	244573	172523	322125	34848.1		12710				126998	130658	128396	370765	164226	244010			7272.63					128093		161324	189951	109436		261018
P01591	P01591	IGJ_HUMAN	JCHAIN	Immunoglobulin J chain											11776.9			10882.9				97255.4	12637.4		27472.3		8948.12	110612	16111.2		35003.3			20375.4		19531.4				12993.1	18891.3							25176.1	23805.6
P01593;P01594	P01594;P01593	KV133_HUMAN;KVD33_HUMAN	IGKV1-33;IGKV1D-33	Immunoglobulin kappa variable 1D-33
P01619	P01619	KV320_HUMAN	IGKV3-20	Immunoglobulin kappa variable 3-20	71323.4	27161.8	36612.6	20883.9	22238.7	14645.7		39213.3	30848.8		16819.6	31066.4	28231.9	34301.7	24560.8		50300.7	42624.4	49744.4	47951.6	9214.34	49499.7	29772.3	43317.4	70812.5	25904.3	9654.78	40152.4	37667	37798.9	76941.8	94964.4	80754.9	45065.8		40882	38239.4	61733.8	108770	75706.2	66397.1		55525.5	186702	123840
P01700	P01700	LV147_HUMAN	IGLV1-47	Immunoglobulin lambda variable 1-47
P01703	P01703	LV140_HUMAN	IGLV1-40	Immunoglobulin lambda variable 1-40
P01704	P01704	LV214_HUMAN	IGLV2-14	Immunoglobulin lambda variable 2-14
P01721	P01721	LV657_HUMAN	IGLV6-57	Immunoglobulin lambda variable 6-57
P01768;P01772;P0DP02;P0DP03	P0DP02;A0A0B4J1X5;P01768;P01764;A0A0J9YY99;P01772;A0A0C4DH42;P0DP03;A0A075B7B8;P01767;A0A075B7E8	HV330_HUMAN;HV333_HUMAN;HVC05_HUMAN;HVC33_HUMAN	IGHV3-30;IGHV3-30-3;IGHV3-30-5;IGHV3-33	Immunoglobulin heavy variable 3-30
P01833	P01833	PIGR_HUMAN	PIGR	Polymeric immunoglobulin receptor			5144.39	9434.32	2526.53				4080.56		4260							43530.7	7945.77	10839.4	2691.39				10302.9	11471.9				10223.7	7197.5	3212.4	4022.56	3265.52	2970.77	3266.2	18364.5		1851.6	2676.14		20903.8	1814.53		9137.69
P01834	P01834	IGKC_HUMAN	IGKC	Immunoglobulin kappa constant	270260	59825.9	177010	54276.3	80172	105159	76507.3	273541	194909	23085.2	51057.5	147267	96917.5	201808	130942		238644	93413.6	124609	115543	124474	103971	107124	89764.3	177969	89701.6	159966	114300	158925	89178.7	248621	241474	188477	131473	29079.4	113970	100465	269297	266895	201901	251400		186352	330178	330940
P01857	P01861;P01860;P01857	IGHG1_HUMAN	IGHG1	Immunoglobulin heavy constant gamma 1	177976	63677.3	172321	61075.4	53059.5	100241	76703.1	196057	141507	150096	75576.8	134813	101195	120734	138717	175765	153271	96229	87808.4	94590.9	47239.3	104386	87479.8	135719	123753	91290.6	56017.4	121707	113688	119557	258494	277638	132552	117985	54011.1	132951	104927	348379	332738	116662	195437	243280	267793	222245	334079
P01859	P01859	IGHG2_HUMAN	IGHG2	Immunoglobulin heavy constant gamma 2	68541.5		35915	30368.1		27481.9	53905.7	21802.5	53548.3	48277.9	11484.4	67018.9	26631	27878.3	33079.3		40539			24436.4					15078.6		15535.1		23123.4		69541.8	24216.3	36093.4	32942.7			12384.1	118036	27448	25576.5	65285.4	70111.2	26782.2	55546.1	62880.5
P01860	P01860	IGHG3_HUMAN	IGHG3	Immunoglobulin heavy constant gamma 3
P01861	P01861	IGHG4_HUMAN	IGHG4	Immunoglobulin heavy constant gamma 4	110940		74776.1		29313.7			93022.6	81668.6				50379.1	31998.4											44816						70272.9	125448						119413	136872			192806			100976
P01871	P01871	IGHM_HUMAN	IGHM	Immunoglobulin heavy constant mu	42029.5	29091.4	39776.1	19050.1	36224.5	16886.9	24850.2	18150.7	37559	66796.1		47981.7	6033.82	20204.2	37876		44607.9	10511.7	17939.1	58209.8	208877	31451.3	26086.2	11365.2	23862.4	27482.8	340632	33181.8	29865.7	25040.7	29836.1	89781.5	95532.9	14603.3	6877.88	12899.2	25933.2	36875.2	89354.9	86575.5	29559.3	66977.8	33757	100805	63882.5
P01876	P01877;P01876	IGHA1_HUMAN	IGHA1	Immunoglobulin heavy constant alpha 1	117515	52290.4	122511	72370.4	89091.3	63645.6	109540	189163	178406	36959.7	35192.4	101773	104844	180386	47324.9		138588	1582850	167184	79268.4	20960.1	155320	84363.8	1842640	206094	51459	20452.7	129026	107501	94844.7	245063	149090	230280	138586	35428.5	171053	110704	251549	174876	240912	288826	209419	212815	361933	171900
P01877	P01877	IGHA2_HUMAN	IGHA2	Immunoglobulin heavy constant alpha 2																																	7562.65							5360.21
P01889	P01889	HLAB_HUMAN	HLA-B	HLA class I histocompatibility antigen, B alpha chain	23160.3	20316.7	32260	15762.3	22458.3	19773.3	22819.4	18712.5	23500.5	23408.1	29002	24163.6	21500.2	22563.5	22773.4	39602.1	27328.2	55014.6	17702.2	32561.8	18543.4	26926	20516.1	44966.8	24977.2	37371.7	17666.8	26429.3	26133.1	20881.2	22841.4	27911	29857.3	14957.9	19913.5	23467.2	23086	19069.6	23208.4	23378.5	21487.8	21113.6	22776.2	19248.9	29927.8
P01903	P01903;P01906	DRA_HUMAN	HLA-DRA	HLA class II histocompatibility antigen, DR alpha chain					7186.06					7266.93	8069.29		11168.5	9542.17			10114	13766.3	13962		12022.1	12290.2	12396.4		5028.38	6506.69	5709.9			10550.9	15326.5	6546.62			7604.26	9880.27						7203.4			8965.8
P01911	P01911	DRB1_HUMAN	HLA-DRB1	HLA class II histocompatibility antigen, DRB1 beta chain									14459.1		35399.2			23801.2	26380.8				58772.4				33632.8		35009.5				18579.3			26766.4			30182.8	19055.3			19724.7
P02042	P02042	HBD_HUMAN	HBD	Hemoglobin subunit delta	339988	284579	455804	405917	349709	381403	206128	475608	403163		664237	647038	217109	401330	356718	283004	422051	248471	533559	906128	311511	329107	262605	379488	513278	906307	280106	272916	191693	233146	366783	266085	260068	163630	267784	540073	300376	386576	367287	307492	424423	378605	537558	797622	258458
P02452	P02452	CO1A1_HUMAN	COL1A1	Collagen alpha-1(I) chain	226738	301554	247248	144278	107977	90715.2	67082.7	186169	170532	92044.3	64588.3	503847	49940.4	50013.1	87505.9	92973.8	129064	513123	570216	93857	106893	529818	103712	51630.6	63132.4	96391.9	58980.1	48539.7	56042.6	185679	387623	226491	307125	218191	249390	96161.8	85184	65276.4	71656.5	48778.6	42435.6	154061	25706.9	68303.8	694613
P02461	P02461	CO3A1_HUMAN	COL3A1	Collagen alpha-1(III) chain			14343.2	11973.4	7874.16			13132.3				28685.6			9584.44			19738.9	14163	13283			9070.22		13106.7	11998.8				18439.1	30667.5	22423.2	18827.5	17137.5			8448.39	18157.7	15745.1			11881.7		12975.3	30905.5
P02462	P02462;P29400	CO4A1_HUMAN	COL4A1	Collagen alpha-1(IV) chain		40703.7	24931.6			34668.7	31800.3		37382.5	113602		34732.8	59924.1	25467.7		53161.2	48067.3		30859.7			45589.4		43891.7			35006.6	37292.8				57569.5					57087.1	40183.7	52628.4			227086
P02511	P02511	CRYAB_HUMAN	CRYAB	Alpha-crystallin B chain	1831460	1613110	1544660	1090570	583420	465366	589542	1281820	1814630	1879560	1756490	1420150	400289	517853	542869	1520140	388652	2079900	1456960	960450	1270080	1407240	1551440	612300	433507	535623	324523	338376	491267	1628540	1785930	576929	1834510	1756970	2156770	1839590	536441	1146490	439636	473302	456104	836278	557312	781790	1485080
P02533	P02533	K1C14_HUMAN	KRT14	Keratin, type I cytoskeletal 14	246567	546349	433843	412237	144350	176806	353978	422347	284974	532057	761657	924750	120144	97730.6	121067	223961	71552.7	679441	527409	674679	120217	182350	104438	111181	41176.6	426191	49828.6	243980	52717.2	663252	854516	117327	425001	211615	185155	123854	1901880	348911	126060	206858	197958	690594	582124	166442	634980
P02538	P02538;O95678;P48668	K2C6A_HUMAN	KRT6A	Keratin, type II cytoskeletal 6A	93573.5	450666	354593	119357	64453.1	103399	183009	231026	49469.9	239602	513924	315599	60763.2	68004.8	41581.9	152403	21321.3	372812	176434	371293	62045.7	70987.6	63285.2	42950.4	21212.1	171992	16392.7	58327.4	14136.9	235946	325826	47641.6	104910	79537.9	116643	37200.9	1251950	146819	53377.6	97926.8	92101.7	209364	101222	159346	298631
P02545	P02545	LMNA_HUMAN	LMNA	Prelamin-A/C	249683	268580	241709	203823	243881	129484	166100	234006	216654	296603	221301	223096	156966	133530	129444	352457	177623	256142	217323	204664	223555	241398	173205	170850	165010	159677	124269	133439	144215	253538	256092	164539	247362	231075	269801	208133	166250	206913	117277	137316	156154	176095	134874	211308	209702
P02549	P02549	SPTA1_HUMAN	SPTA1	Spectrin alpha chain, erythrocytic 1	12872.8	9244.28	13688		14281.2	12359.7	9200.76	11625	12192		9695.87	19437	8180.71	10359.4	9845.73	38597.2	11165.8	8536.95	14497.6	18239.3	7822.1	10966	7706.19	12691.3	11672.9	13675	10653.1	12153.4	8269.13	11149.1	12019.7	9957.6				15176.7		13241.1	11929.4	8187.11	12422.1		17837.7	16322.9	13738.8
P02647	P02647	APOA1_HUMAN	APOA1	Apolipoprotein A-I	48288.5	24703	51109.9	19725.9	22313.2	23537.9	21648.2	46307.9	23732.2	54275.9	23699.8	25677.3	13839.9	18616.4	48209	53030.6	20889.8	23423.7	59381.3	38643	31989.8	49928	36695.5	25267	65714.7	17234.3	37781.8	50196.9	43377.1	23911.8	15408.2	55157.2	53371.1	22750.6	22129.1	25257.4	16214.1	10686.8	64097.1	31157.7	12552.6	69514.6	27190.6	47690.1	35991.4
P02649	P02649	APOE_HUMAN	APOE	Apolipoprotein E	44244.5	44398.6	53875	40535.4	101884	95016.4	77167.2	45262.4	62285.7	32068.4	52355.6	32369.2	102679	143063	132296	46962.7	116650	88429.4	45071.8	90056.1	71561.8	47764.3	67234.3	108717	91638.2	103222	164433	151530	155315	67131.3	39928.4	152031	64613.8	43206.5	54096.7	63944.2	137609	44898.1	171369	141146	113775	57387.2	157442	118402	62187
P02652	P02652	APOA2_HUMAN	APOA2	Apolipoprotein A-II	8002.08		5707.63	6303.81	4850.47	5892.99	6463.19	6156.58	6820.36	8323.68	8074.33			5740.69	6307.04	18016.4	5030.34	5914.23	9046.99	9903.98		7539.46	8562.73	10848.6	9318.74				5490.31			7753.7	5633.57						9583.01					11100.2
P02656	P02656	APOC3_HUMAN	APOC3	Apolipoprotein C-III
P02671	P02671	FIBA_HUMAN	FGA	Fibrinogen alpha chain	75194	31450.1	104625	70099.8	31276.9	77169.6	128905	60371.7	96219.8	58249	32171.3	65859.5	28784.6	71707.3	74381.5	105460	119951	18143.5	16457.5	45856.4	12896.1	40415.1	48068.7	30191.2	19334.7	33626.2	24379	59499	76001.7	58839.3	84131	60598.5	73239.6	30999.5	28865	37455.3	58999.8	116520	65228.5	60296.6	45429.1	99312.9	48074.9	145675	113186
P02675	P02675	FIBB_HUMAN	FGB	Fibrinogen beta chain	32469.7	17541.3	51302.3	55411.4	21201.5	41119.9	52903.4	39265.8	51753.2	37781.5	19975.5	58426.1	18548.4	46649.5	51837.4	32516.3	70543.7	10798.5	21531	26823.8	18658.6	22716.1	37914.7	13886.3	12672.1	15338.6	16440.4	36959.9	37943.6	36345.8	54180.6	41734.6	44260.7	18687.7	15198.7	24519.3	32261	51860.2	39400.5	31981.5	31823.4	42865.8	31314.4	93201.8	58152.6
P02679	P02679	FIBG_HUMAN	FGG	Fibrinogen gamma chain	119854	47338.8	164976	104259	49019.6	101789	132012	88705.5	135955	79278.5	42892.1	102101	38625.1	91800.9	94271.7	82100.8	167221	22199.1	27555.4	54030.4	25974.4	61988.5	71516.5	38596.1	27832.9	34308.8	35823.4	81267.9	88818	102412	128725	91211.3	111920	45666.9	43022.7	41880	76354.1	149929	86692.4	73133	71439.1	89791.2	55098.9	182115	129016
P02686	P02686	MBP_HUMAN	MBP	Myelin basic protein	8929670	7923030	7802180	7268510	1473880	2028370	1706720	5223890	9265720	8705000	9225900	10605700	1095130	1399060	2142150	5661530	1209400	6365930	7290100	4892820	7693380	7742010	6591560	1710790	1410620	1896210	1387660	1403060	1302810	9453620	7370650	1543350	6911520	8667790	10311100	9664710	1666530	3385090	1463170	1588950	1287740	3155860	1791140	4979640	8622330
P02689	P02689	MYP2_HUMAN	PMP2	Myelin P2 protein	813342	839939	740305	905207	88561.8	259593	73900.2	525574	1073530	422987	419798	971707	55771.8	94030	51080.2	198908	53816	472969	683440	813738	720829	994831	669939	145254	86483.4	120145	88725.6	100528	153605	755435	745978	101679	695945	1208710	670295	1119780	76702.1	235548	90404.3	97060.9	94167.4	200787	83534.9	952637	1278820
P02730	P02730	B3AT_HUMAN	SLC4A1	Band 3 anion transport protein	76390.8	55385.3	68030.1	54547.8	57047.2	65095	51868.4	64133.9	73570.3	44094.5	54997.5	115942	41262.7	72489.4	53163.6	122626	67124.6	33194	80883	96273.3	38816	60699.9	35232.5	70896.7	87313.8	75371.7	50308.4	55356.3	38910.4	22437.7	53474	62487.7	38165	21939	37142	93329.5	32374.3	46235.6	79263.5	48274.1	74720.1	85434.4	106616	111243	43554.7
P02741	P02741	CRP_HUMAN	CRP	C-reactive protein	18523.4		8374.34	9797.52		8458.06	8675.55	14865.3	9935.62		9532.03	9579.97	6150.38	10551.5	6970.07		15943.8			8508.47			5364.13	2640.34		6751.95	3301.21			13494.9	20052.2	27778.9	16779.9	14526.4		16960.1	18726.7	18403.5	32185.5	15328.8	29562.7		23493.9	34875.6	24726.9
P02743	P02743	SAMP_HUMAN	APCS	Serum amyloid P-component	18174.1	7302.73	20375.7	12139.4	6407.39	12317.7	12889	18192.8	15054.5		7944.42	16034.2	11898.3	11074.4	11342.7		19622.6	7759.83		16875.1	6891.05	13044.7	10095	10112.7		7279.22	10773.7	12922	12853	11072.4	27836.4	11509.8	13380.6	7440.33			7192.18	23379.9	10987.1	11157.2	6881.88	19993.2	7317.94	15855.1	19710.4
P02745	P02745	C1QA_HUMAN	C1QA	Complement C1q subcomponent subunit A	15921.8						7582.41						17179.8				25765	14794.7						9914.01						15059.7		24420.9	16641				38950.8	18860.3	20784.7		17991.6			11894.7
P02746	P02746	C1QB_HUMAN	C1QB	Complement C1q subcomponent subunit B	11696.5		11209.8			10601.4	13154.5		9204.54	10120.5			8809.7	11339.3	8747		12839.8	5659.82	4272.06			6808.49		15088.9	6701.9		7883.26	8382.04	9527.27		10749.1	15949.9	12007.1	9315.66			11778	13089.8	13656.6	16492.4	19639.4		18730.2	12182.7
P02747	P02747	C1QC_HUMAN	C1QC	Complement C1q subcomponent subunit C	18488.8	7237.66	18462.3	10029.6	7192.83	14505.4	14713.4	5926.12	11924.3		5359.57	10706.7	18330	19877.8	12427		19997.7	9232.95	6491.43	7662.66	4532.2	8702.5	5803.99	21337.7	9275.93	8909.68	10881.4	9061.8	11802.7	16719.7	14311.6	32310.3	21058	15920.8	4997.37	11586.4	22374.6	17724.8	24777.2	32499.9	35443		30844.8	16199.8	14912
P02748	P02748	CO9_HUMAN	C9	Complement component C9	11581.3		11298.2	9759.43	4820.39	5655.44	8582.3	10615.8	8069.58		8910.27	10546.6	5995.74	7324.8	6027.53		8372.69		8387.62	9283.63	5642.11	8764.92	9549.38	4938.6	6571.66	6727.78	6465.37	7514.7	8537.34	7206.41	11748	11446.3	10312.4	6272.88	3647.99	8162.88	6344.83	9771.09	12162.8	8213.03	6465		8195.86	17394.4	13478.3
P02750	P02750	A2GL_HUMAN	LRG1	Leucine-rich alpha-2-glycoprotein	24083.3		19841.3	24153.6	12039.1	7404.09	11969.2	12186	22058.7	25932.9	21887.9		11682.8	20717.6	10744		13108.7	13065.7	22084.2	20563.2	18886		17390.3		16731.2	19792.9	10654.8	8935.96	10782	18142.1	29686.5	27218.2	24966.1			14001.8	16797	28347.5	32694.1	27689.9	14629.6		10194.2	23145.7	34181.2
P02751	P02751	FINC_HUMAN	FN1	Fibronectin	29785.5	18363.7	32506.6	22635.6	19080.1	23715.3	21037.6	24548.6	23179.6	33082.5	15288.3	19800.7	16220.3	19502.8	20568.2	43926.1	30173.5	30697.3	21242.9	24669.5	20986.6	23603.1	29580.9	28082.1	20111	20264	18566.6	22676.7	34875.8	22599.2	21024.7	26409.9	26232	14909.5	14498.1	14757.4	19100	20406.4	24021	23734.5	14625.9	57452.1	15961.3	38567.9	25323.7
P02753	P02753	RET4_HUMAN	RBP4	Retinol-binding protein 4	7847.96					9378.42	7003.73	4159.22					5451.36		10535		9471.7					4070.24	8615.25	8767.47	8103.27		13231.8	5464.43	15602.9		6400.89	7852.24	8966.99			4827.87	6761.55	9464.54	10641	13301.7	7205.1		6036.72		6586.83
P02763	P02763	A1AG1_HUMAN	ORM1	Alpha-1-acid glycoprotein 1	104507	32502	47151.4	37136.1	26108.3	32813.2	78544.5	59240	81926.9	55717.1	31554.2	43878.1	32149.9	46382.3	25855.6	253404	40613.4	24487	46586.6	73187.9	38631	26846.8	36993.4	36722.9	52359	120449	73033	24973.2	49611.6	35975.3	125020	75089.1	203914	44780	35033.6	48998.6	56395.5	139270	79471.7	176248	112722	220700	61942.1	37922.6	71623.5
P02765	P02765	FETUA_HUMAN	AHSG	Alpha-2-HS-glycoprotein
P02766	P02766	TTHY_HUMAN	TTR	Transthyretin	21527.2	13147.3	20598.8	8956.02		11997.9	21227.5	17930.3	21012.7	21934.7	20274.1	21713	12546.6	7966.56	19106.5		11764.9	22810.9	26843.1	15992.8	12135.1	30690.1	30670	16167.3	14769.1	13194.4	11552.7	17149.7	28994	19830.7	22904.8	18109.8	27504.9	10971.5	26602.4	21997.5	12145.3	24917.7	9050.88	26940.3	11211	40515.4	13273.5	5903.63	18542.9
P02768	P02768	ALBU_HUMAN	ALB	Albumin	1398120	415341	1321490	737997	441703	885116	927272	1083980	1243360	1118530	1170760	1036910	675114	898170	604087	1726990	925442	808345	1305930	1375500	588162	647663	669248	1171100	1010120	1027340	686309	544066	794302	1174780	1407530	858885	991826	677127	374299	807210	1301790	2016620	897145	1227210	1211160	1691510	976351	1385820	1038260
P02774	P02774	VTDB_HUMAN	GC	Vitamin D-binding protein	13541.8		7811.12	6085.63		5884.88	7903.14	8759.34	9034.42	9575.29	8676.28	9900.11	4245.07	7888.71	7845.3	20529	10970.5		8735.6	10827.6	6703.58		15465.6	4571.83	5478.46	7910.07	7275.67	7456.52	11853.8	8249.92	11807.7	14522.5	12123.3	5438.39		11412	6596.57	9018.8	14516.5	13013.1	9523.76	14404	10390.1	11065.3	12839.1
P02786	P02786	TFR1_HUMAN	TFRC	Transferrin receptor protein 1	15984.4	10628.9	13438.2	11565.2	8719.81	7408.37	7982.61	13537.6	9669.38	12855.6	10131.4	13046	6822.51		8471.47	12390.4		11082.3	11344.4	20944.3		13050.2	10945	8450.86	6990.46	8193.82	5687.39	7061.91	8196.48	9470.16	16705.9	20650.6	14128.4	8309.65	11931.8	13735.4	9719.23	34811.1	6867.39	7056.25	11160.3	15397	5637.88	10599.1	14577.3
P02787	P02787	TRFE_HUMAN	TF	Serotransferrin	352267	217439	239187	215382	127735	137774	159483	239936	270970	306391	315407	253603	149154	148785	192009	332268	118915	261467	346194	256523	273203	196468	223059	201749	197572	233887	134981	139950	168967	303927	390152	206456	312988	256679	190870	252608	235983	364537	201234	200686	227370	291246	186107	220958	312318
P02788	P02788	TRFL_HUMAN	LTF	Lactotransferrin	23328.4	14018.8	13945.2	28079.4		11033.7	25440.6	15123.7	16932.4	39288.1	17995.4	27333.3	15355	10042.3	13076.8		16725.8	65287.2	21578.1	27659.7		21137.4		8694.09		18620.3		13423.9	11793.6	33156.9	21771.1	24583.8	21372.5	65930.5	12239.5	15372.7	29633.6	22242.1	23291.9	24144.4	14209.1	81334.9	12751.7	16990.4	28580.9
P02790	P02790	HEMO_HUMAN	HPX	Hemopexin	46907.9	26256.6	35679.5	32002.6	31651	27927.8	33963	35055.6	46366.2	61696.4	34878.7	23428.3	20794	39393.9	24388.1	178888	40450.9	12067.6	40998.3	36820.7	27878.4	32827.1	24399		46368.7	33523.7	26064.6	29409.9	31475.8	40053.9	20435.5	41822.6	59088.8	28633.3	18317.8	16354	47741.1	21657.8	59286	60560.4	33264.6	163698	18338.7	43761.6	50780.9
P02792	P02792	FRIL_HUMAN	FTL	Ferritin light chain	719456	986455	933413	507904	1436680	1985630	1677030	931242	1421720	1511180	1038060	841482	2024440	1723490	1210690	3621020	2682740	1761420	1146050	476719	888522	731015	1152390	1208330	1897340	1057620	1607930	971817	1588250	1730210	1206980	319682	770855	986716	903286	963759	1611140	908648	1555950	1424090	1003570	1588300	1847150	1071400	916692
P02794	P02794	FRIH_HUMAN	FTH1	Ferritin heavy chain	834040	903934	868629	779520	597059	637978	629771	988271	1066130	1100510	846360	864020	600856	591669	694194	925290	804958	991885	664886	452887	921925	744178	653268	469748	691341	593040	798967	406589	582047	887150	967407	319869	966868	983397	889111	712055	587147	595166	627689	673760	598320	613481	671087	770473	772598
P02810	P02810	PRPC_HUMAN	PRH2	Salivary acidic proline-rich phosphoprotein 1/2																									63290.9									6253.87			56398.3
P03886	P03886	NU1M_HUMAN	MT-ND1	NADH-ubiquinone oxidoreductase chain 1	32344.2	24445.1	30567	43009.4		49621	45199.2	32735.1	37507.7	14313.9	29844.5	35512.3	64957.4	68317.6	45966.6	18728.8	67588.8	30831.5	34440.9	55968.9	20174.4	20324.4		74177	74155.9	52062.9	51293.8	39478.2	72670.1	35038.6	46231.6	69800.3	45567.6	43333.4	41283.9	25737.6	69733.1	106702	82071.9	72440	76762.6	18495.9	57094	88379.5	39614.5
P03891	P03891	NU2M_HUMAN	MT-ND2	NADH-ubiquinone oxidoreductase chain 2				20039.5			36496.1						26921.7	54315.7			37160.2			15360.8	23148.3	15870.2		35865.2	72647.4		60069.3	54494	70446.2			47372.6		18021.2	16708.5	18742.3	35745.4		60221.8	45791.2	44402.9	87495.3	71137.7	42188.1	19223.3
P03905	P03905	NU4M_HUMAN	MT-ND4	NADH-ubiquinone oxidoreductase chain 4	76739.5	65341.4	65261	82976.9	68189.1	148021	218710	66677.1	68982.1	174838	77448	97767.8	145774	145807	106783	310561	122626	69054	73569.6	117643	96518.9	96674.5	91054.2	168517	188312	112975	249351	224266	175114	112086	111944	191234	135727	97249.2	127092	112427	194790	250660	222225	185589	218692	291888	243017	172697	97808
P03915	P03915	NU5M_HUMAN	MT-ND5	NADH-ubiquinone oxidoreductase chain 5	73889.2	75565.7	68610.5	105823	98211.7	67885.7	136556	58113.8	109818	42967.3	62565.2	81204.1	127011	119756	53536.9	221450	87525	69595.4	64135.3	108020	67541.3	79863.3	60632.5	92643.1	108070	113846	160545	118576	100706	62534.6	81958.5	126942	81861.3	64354	56486.9	65634.6	99874.9	168089	127898	116776	138382	69994.1	135406	163157	75195
P03923	P03923	NU6M_HUMAN	MT-ND6	NADH-ubiquinone oxidoreductase chain 6
P03928	P03928	ATP8_HUMAN	MT-ATP8	ATP synthase protein 8
P04003	P04003	C4BPA_HUMAN	C4BPA	C4b-binding protein alpha chain	29623	8733.87	23174.7	18929.7	8675.12	8968.52	10632.1	31604.9	16856.8		10947.6	19007.9	9054.29	11973	12574.9		19314.3	5513.14		35302.3		16879.4	16911.6	6421.16	8370.29	12650.9	9546.67	11339.4	9047.33	9582.38	20270.2	33646.4	21909.7	9108.86		11428.3	10360.8	14193.5	26345.8	15744	11797.2		19158.5	59772.6	27611.3
P04004	P04004	VTNC_HUMAN	VTN	Vitronectin	19848.7	8329.75		24148.7	14624.5		27711.9	19832.4	22503			14755.5	11132.9	17685.2	14843		16657.7		11259.8	26230.2	10005.3	17391.3	22274.8		10367.8	17015.9	14831.8	22099.7	28481.8	17900.3	19757.5	30239.9	30138.6	16479.4	13123.6		18403.2	21104	32179	24489	18447.7	66214.1	13682.8	32948	26292.2
P04040	P04040	CATA_HUMAN	CAT	Catalase	52618.3	42184.1	49238.6	52664.3	24291.7	44737.7	40955.2	54099.4	50572.8	42038.9	54527.7	81091.7	40191.3	36924	38580	89123.1	44738.3	42995.8	62944.7	60918.9	36322.7	48287.5	30285.3	45121.9	55023.2	55759.2	37689.6	86238.5	26415.1	46333.5	61710.7	36591.9	46167.5	46889	51965.8	51567.4	45394.7	43557.3	38592.7	39652.7	53264.9	78723.4	71393.4	69866.3	55757.9
P04062	P04062	GBA1_HUMAN	GBA1	Lysosomal acid glucosylceramidase	5457.26	9437.9	8384.04	7916.29	10969.9	5823.21	7257.15	7858.87	6614.52		15979.9	7308.01	8448.7	9572.27	13074.4		8467.14	13060.7	12979.8	10291.8	9553.79	10688.5	12791.6	9878.94	9835.56	9738.51	7247.97	13346.6	9276.97	13304.7	11236.6	8073.6	9679.18	10048.6	7536.13	10443.8	16737.6	9631.28	8820.81	8052.17	9787.89	18228.8	12631.1	9077.53	12807.4
P04066	P04066	FUCO_HUMAN	FUCA1	Tissue alpha-L-fucosidase	20103.9	18238.8	12257.5	14919.3	21809	16948.8	14070.2	10234.8	15383.7		16555.9	16346.4	20405.7	12746.2	21303.5		8622.46	18710	22566.3	21250.4	12057.2	17549.1	16102.3	33822.6	15971.5	18301.4	13566.1	27741.8	15096.7	19490.6	18386.5	17280.1	17159.9	22875.1	11051.4	16644.6	24486.3	13188.8	20912.2	26246.1	23576.2		19912.4	23667.1	17408.9
P04075	P04075;P05062;P09972	ALDOA_HUMAN	ALDOA	Fructose-bisphosphate aldolase A	1297190	1128130	1129070	1094230	1140530	1453830	1556040	1176140	1549670	2332370	1627040	1341980	1447420	1408780	1670330	2254220	1736410	1380760	957800	1164520	1154700	972780	1215430	1582950	1266000	1078000	1531260	1148950	1344010	1343950	1699430	1292910	1258560	1471710	1004570	1446050	1399790	1709100	1278750	1336500	1459130	993641	1832590	1803620	1181320
P04080	P04080	CYTB_HUMAN	CSTB	Cystatin-B	190209	168548	201257	139674	128049	194886	205142	136010	178872	256381	137215	169110	191617	168259	204622	377414	263987	162969	110738	118683	127439	161575	95425.8	167377	154490	121445	217491	147824	150514	140917	140720	111064	141020	173287	178089	191932	136482	88282.1	132873	130541	143041	261216	159425	134763	175160
P04083	P04083	ANXA1_HUMAN	ANXA1	Annexin A1	30426.7	54483.1	76182.6	20557.2	19668.7	15755.9	12052.4	32850.5	29259.9	26286.6	46657.4	33401	27909.6	10042.1	13713.9	25850.8	22659.4	30013.3	68937.2	23660.5	19287.4	47038.7	45975.4	12376.6	22997.8	22693.1	8281.28	7950.44	16818.5	48345.2	37563.5	20463.1	23936.3	22989.9	41096.9	44662.3	25877.4	26328.4	10777.6	12578.7	14546.9	37531.5	12319.8	16515.8	59168.9
P04114	P04114	APOB_HUMAN	APOB	Apolipoprotein B-100	20242.7	10031.3	20188.8	9743.1	9251.44	7872.23	9806.05	18888.6	7964.66	12154.6	9834.02	13240.4	7847.94	5270.21	7631.62	12982.4	10811		10614.5	22197.6	10901	9566.01	16253	7155.68	9455.22	9075.91	7036.99	10218.5	12134.8	9773.17	13074.5	13351.7	14788.6			9856.89	8051.92	18110	11399.7	11279.9	5755.69	25566.2	9575.32	17722.4	14762.9
P04156	P04156	PRIO_HUMAN	PRNP	Major prion protein	88105.2	97825.7	84221.8	96351.1	62766.2	112483	87144.9	96445.6	109844	102147	84393.9	62516.4	97291.8	100492	107652	198573	85083.7	119435	65830.5	78752.5	84236.1	76471.6	73471.8	113188	60020.8	72635	120726	116956	84037.3	63167.2	73310	60598.3	92597	85931	68129	68453.7	80420.7	54326	74285.3	81668.3	80147.4	67527.7	64156	49160.6	59640
P04179	P04179	SODM_HUMAN	SOD2	Superoxide dismutase [Mn], mitochondrial	91265.7	93624.8	97314.9	94000.3	145456	149716	155730	84400.1	92731.9	76237.2	97559.8	108247	173905	177074	154833	249990	233531	136041	93291.7	142986	69541.3	83441.3	97199.8	132532	149338	106695	151371	121851	146373	120014	129572	200404	134449	128638	100985	149294	190867	153282	176609	170962	170798	167220	228511	149176	118040
P04181	P04181	OAT_HUMAN	OAT	Ornithine aminotransferase, mitochondrial	33230.5	33091.3	24807.5	26876.4	37116.3	62039.9	60591.4	20215.3	25504.9	23811.9	24395.3	28258	64718.6	49561.7	48601	102974	41600.6	32306.8	23471.8	48485.7	25521.7	23917.4	27434.3	66222.2	41361.8	50539.2	61351.3	70895.6	55288.9	22577.3	36352.1	69713.3	34922.4	34399	32428.7	28886.2	67043.8	91267.3	68189.4	89707.1	86574.9	55394.1	64130	43821.7	29457.2
P04196	P04196	HRG_HUMAN	HRG	Histidine-rich glycoprotein	26398.7		17662.8	8018.79		15539.8	30840.8	18267.2	22183.5		34278.5		21171.4	24942	21571.5		32141.2		27273.4	15346.7	32661.2		42148.1	18558.4	39847.3	21286	16783.2	23635.1	39223.5	16653.3	26874.3	34197.3	27247.4				21541.8	58769.3	40741.9	28180.2	10456	89406.4	26596.8	50659.6	26926.3
P04216	P04216	THY1_HUMAN	THY1	Thy-1 membrane glycoprotein	484283	746350	690938	474262	150087	1139600	1245160	381170	831931	1004510	478131	624133	844611	734484	1135840	4559550	768160	649834	343655	389066	490444	852404	387961	931221	647964	762444	1221780	1259570	764142	567290	430009	826079	759361	793266	756055	640819	796533	715787	1041340	1183800	1185650	1243910	1415460	689815	579219
P04217	P04217	A1BG_HUMAN	A1BG	Alpha-1B-glycoprotein						3608.74		9150.27											7984.65	8446.38		5227.89			6468.61			4417.49				5147.04					5622.51	8011.24	6947.95	5827.39		10889.1		6494.16
P04233	P04233	HG2A_HUMAN	CD74	HLA class II histocompatibility antigen gamma chain		5247.12	8874.33		5058.6	4559.38		5085.49	5943.24				4970.51		4353.17		6287.44	8423.52				8449.14											10516.5	8959.23	7184.52	9508.61							5093.27
P04259	P04259;P48668	K2C6B_HUMAN	KRT6B	Keratin, type II cytoskeletal 6B	17914.3	152883	97720.6	22177.1	14440	31483.8	49462.7	74557.1	15057	80941.6	119889	72173.9	18131.4	18678.4	9075.95	34500.9	14124.5	122402	33847.1	78045.8	9799.44	19801.2	25771.3		13232.2	30344.5		16334.2		43998.9	60331.8		22385	14633.3	21431.3		356320	24795.2		17812.9	21017.6	110088	20643.2	70900.8	52514.9
P04264	P04264	K2C1_HUMAN	KRT1	Keratin, type II cytoskeletal 1	2939950	3174690	2414320	4889640	2145830	1396560	3746360	2886670	4325050	3860170	8401600	6219880	1424230	824458	2077060	3100120	712216	6914270	7075790	7298130	1440200	1483880	1643530	1405170	500351	5592380	837461	3969430	520063	7296560	8408520	2102450	3622610	3194190	2068730	1407880	8655330	3594690	1938370	3279910	2054170	7990530	4991950	743443	7116670
P04271	P04271	S100B_HUMAN	S100B	Protein S100-B	2457630	2854830	2517780	3101740		1342950	2026010	4369790	2982300	5092090	1966120	3478320	1470420	1353760	2994870	4511670	1853040	1855930	2580800	1814440	3339250	3879400	3405720	1166890	1978590	2117590	2645720	1654230	1552200	2581880	2212810	1618840	4828000	4488170	5212570	4355670	1332790	1811860	1375010	1827760	2321560	4629850	2066340	2111660	5227500
P04275	P04275	VWF_HUMAN	VWF	von Willebrand factor	22605	20311.2	20126	19425.7	24698.9	16964.9	21686.3	13289.7	16393.7	14594.3	9029	13861.7	15562.3	12436	15023.2	16634	16633.7	17083.4	34872.9	21693.2	21389.8	21717.7	23500.4	25476.6	32446.7	19270.4	26158.3	23256.2	30281.4	28146.7	19362.4	19529.3	22496.8	14874.2	16285.2	15175.4	32925.8	22210.4	17388.4	23094.8	20484.7	31032.5	18934	34061.1	12755.3
P04279	Q02383;P04279	SEMG1_HUMAN	SEMG1	Semenogelin-1										3581.8								2769.64	2571.47	2555.33						1007.98				2133.84		1344.52					3757.45	2099.76							8819.6
P04350	P07437;P68371;P04350	TBB4A_HUMAN	TUBB4A	Tubulin beta-4A chain	2945760	3171250	2672550	2767570	1607320	2382060	2137680	2828030	2827820	2780560	3869170	2470110	2281040	2319150	2522030	3350370	2473630	3202990	2636960	1896870	2643400	2679170	2513110	2173670	2232820	2122810	2029590	2119040	2191450	3186650	2659260	1851090	2659720	2800700	2877250	2466510	2463480	1829370	2380360	2087290	2002020	2324790	2148380	1684310	2687560
P04406	P04406	G3P_HUMAN	GAPDH	Glyceraldehyde-3-phosphate dehydrogenase	1400360	1351100	1599390	1489800	1020600	1456140	1555590	1882770	1499870	2086580	2310760	1795470	1749220	1862140	2099340	1860020	1797600	1802790	1874220	1165140	1538110	1167830	1991220	1234870	1411520	1138180	1297610	1079490	1333070	1702550	2125610	1257920	1748950	1962180	1433700	2448480	1561510	1811000	1187200	1249410	1363210	1166050	2108100	1918100	1881730
P04424	P04424	ARLY_HUMAN	ASL	Argininosuccinate lyase	18943.2	17537.6	23183.5	14212	16804.2	19071.3	14946	24426.9	22219.8		19782.2	25465.1	19884	19406.7	18536.1	37084.8	18431.1	19253.8	23719	21890.2	20427	23371.6	20544.1	13961.7	19441.7	15860	17308.8	19245.1	14459.9	24091.1	21737	18703	16860.6	20036.2	24333.9	20633.8	21848	17400.1	15300.1	15569.5	17584.3		18570.9	26117.2	22241.8
P04439	P04439	HLAA_HUMAN	HLA-A	HLA class I histocompatibility antigen, A alpha chain	116250	71689.9	79110.3	54070.3	58789.3	64977.2	62080.9	53926.6	65605.9		84804.4	50477.2	70512.1	63965.2	38733.5	40608.5	60317.3	79622.3	66038.5	120591	77014.4	67405.5	70271.9	92267.2	69756.5	107580	55397.6	47789.1	63869.9	58896.9	73946.6	66382.1	82614.1	47216.5	47320.5	57702.1	61313.5	65227.7	57970.3	76429.8	49440.3	38581.2	55570	89619.4	88056.2
P04632	Q96L46;P04632	CPNS1_HUMAN	CAPNS1	Calpain small subunit 1	103381	111321	143666	126566	73104.5	67286.5	56449.7	156440	96375.4	61502.5	136016	102415	96396.6	86162.5	80115.8	43669.8	102794	127543	130923	98447.2	136014	129340	128534	59776.1	96370.6	86377.9	82070.3	68940.4	72312.1	104065	96214.9	69371.9	103311	116197	98202.6	124757	65214	77017.9	73227.8	70120.5	74908.5	87036.1	71993.7	103194	123720
P04792	P04792	HSPB1_HUMAN	HSPB1	Heat shock protein beta-1	293358	391292	347656	226095	312603	362778	288196	264892	218348	251014	261550	259641	329171	169707	240195	516758	330280	203975	226224	272114	153547	322426	159269	227875	151305	308368	187307	181556	213687	269474	234716	203174	181565	242354	237825	309056	331177	318858	222925	257590	366358	384531	295293	241159	290347
P04839	P04839	CY24B_HUMAN	CYBB	Cytochrome b-245 heavy chain	9905.8	5558.2	7644.16	9861.02		4925.42	7242.46	5143.27	9200.41		8371.29	10140.1	8437.65	8381.89	5192.7		7723.52	8103.97		5544.44		6321.55	9553.08	7394.85	8846.99	6213.44	5257.86	4594.09	5698.59	11003.5	9068.36	8323.45	15475.7	11487.9	9017.17	10549.3	7062.64	7609.53	8893.09	8369.81	10228.4		5854.2	7022.11	12167.3
P04843	P04843	RPN1_HUMAN	RPN1	Dolichyl-diphosphooligosaccharide--protein glycosyltransferase subunit 1	60975.4	56994.3	60036.1	51308	79803.4	81112.2	66736.5	52318.4	52539.9	60266	64723.2	51251.6	72768.5	61572	84785.3	111915	56648.8	57546.3	49984.9	59770.5	51662.5	46271.3	49218.8	80971.3	52194.5	76268.1	68270.7	71225.3	72648.6	52416.7	61787.3	64480.2	65020.3	47689.5	54808.7	46991.6	78189.2	70930	71623.2	77350.1	73693.4	77777.6	67045	47907.9	60219.7
P04844	P04844	RPN2_HUMAN	RPN2	Dolichyl-diphosphooligosaccharide--protein glycosyltransferase subunit 2	33661	30814.9	29837.1	36421.8	38612.9	44263.1	48240.4	27921.7	26036.6	44798.6	26036.1	36632.2	57039	48086	49689	93040.9	41921.8	26750.3	30635.8	41447.3	32287.5	29246	32832.3	52113.3	35247.7	51562.5	43016.8	42974.1	51413.1	31703.3	40213.5	41704.1	41220.2	34235.3	34154.4	35710.1	50818.1	47187.2	47735.3	55682.1	60117.6	63729.2	53369.2	36684.9	39569.4
P04899	P04899	GNAI2_HUMAN	GNAI2	Guanine nucleotide-binding protein G(i) subunit alpha-2	673893	717152	716901	794101	448455	372287	444862	749797	818598	745829	644769	824748	432844	413128	400399	704929	438361	648678	719512	602547	779209	814670	754938	386272	434150	390282	463528	441904	354849	819005	780413	507572	784572	897572	835550	1063450	405275	377879	335058	409011	443476	330471	448025	611295	878704
P04908;Q7L7L0;Q93077	P04908;Q7L7L0;Q93077	H2A1B_HUMAN;H2A1C_HUMAN;H2A3_HUMAN	H2AC25;H2AC6;H2AC8	Histone H2A type 1-B/E
P05023	P05023	AT1A1_HUMAN	ATP1A1	Sodium/potassium-transporting ATPase subunit alpha-1	1653880	1691600	1758950	1893350	1223630	1439000	1547890	1805570	2158180	2126400	1542420	1980440	1493380	1418380	1577130	2578240	1385470	1779680	1491230	1480700	1666280	1901750	1432620	1552200	1227710	1349690	1630400	1531700	1356850	1682990	1922170	1523520	1808700	1879160	1837680	1881780	1494270	1955320	1416630	1519430	1652320	1647490	1695060	1920140	1777390
P05026	P05026	AT1B1_HUMAN	ATP1B1	Sodium/potassium-transporting ATPase subunit beta-1	2292970	2296620	2457810	2340240	1622130	1673570	1315350	2684940	2481630	1856660	2436000	2293250	1819590	2003180	1864010	2251380	2075140	2833860	2873250	2586380	3854660	2527650	3068010	1718400	1776920	2340950	1863800	1722680	1983960	2571060	2965050	2752000	2747550	3256700	2635050	3651890	1982830	2220130	2169540	2051910	2219540	807053	2383440	3361090	3363240
P05060	P05060	SCG1_HUMAN	CHGB	Secretogranin-1					31796.9	55951.1	56198.7		4969.78	24998.1	2912.84		36977.7	43538	58100.9	89812.2	78010		6739.72	22165.2				40854.5	52051.3	40813.2	100546	75082	63209.8	4425.58		40122.9					39351.7	23811.4	34700.4	71105.7	59006.2	17579.6	42482.8	14876.1
P05062	P05062	ALDOB_HUMAN	ALDOB	Fructose-bisphosphate aldolase B
P05067	P05067	A4_HUMAN	APP	Amyloid-beta precursor protein	34232.2	31787.4	26318	34720.4	38995.3	40038.4	42582.1	25943.8	35203	71092.6	32836	29700.8	40791.8	38334.5	53186	56754.1	45184.5	36677.9	23719.3	24927.1	33498.2	27676.1	26896.6	38090.7	30001.3	34264	46202.5	54883.7	37191.8	28473	31459.2	34056.6	32201	31705.5	34251.7	28190.1	32285.9	28253.9	46318.7	40737.4	33462.7	50489.9	40210	27534.5	30747
P05089	P05089	ARGI1_HUMAN	ARG1	Arginase-1	24309.2	25828.9	22331.6	41745.3	18905.9	11380.6	27867.7	25396.5	53341	36595.2	86091.6	74445.3	10806	11496.8	20304.4	18941.3	11361.1	64089.9	78512.8	77836.8	13560.8	22292.3	19012.7	10340.5		52003.9	8606.82	100040	8352.78	79779.5	83030.8	18975.7	23897.3	36649.6	19988.1	15955	103807	33002.1	15440	21459.2	21099.8	78171.3	129248	8909.93	75188.1
P05090	P05090	APOD_HUMAN	APOD	Apolipoprotein D	279735	287944	305663	277714	301718	137833	135333	309990	255240	181088	217888	387323	220553	309265	227727	95237.4	311810	290700	353867	204954	317137	246445	396720	156151	275255	242499	229456	121854	207496	199443	270000	242101	165732	201861	213614	342718	160281	118663	214298	136474	86361.7	69530.2	302000	378724	284413
P05091	P05091	ALDH2_HUMAN	ALDH2	Aldehyde dehydrogenase, mitochondrial	232322	235691	215821	200134	472619	344144	336476	271694	220398	293292	347937	219514	422335	333847	408199	376396	358889	311777	266795	407627	320442	220364	266667	392679	402220	407214	368035	327881	341385	206651	358188	338070	261125	241244	251448	276700	338827	459433	284765	402592	525820	264601	391891	427159	248487
P05107	P05107	ITB2_HUMAN	ITGB2	Integrin beta-2	17992.8	15921.2	17367.7	13061.4	12085.2	13339.7	12162.3	13931.7	13430.2	15775	14297	13014.9	16001.6	14212.6	13171.7		17687.7	20716.2	12688.8	10122.7	11493	15486.3	13360.6	13506.5	11451.1	10347.9	9275.41	8595.38	10165.7	17449.4	13763.6	14780.7	23688.8	16779	12472.8	15773.7	10021.6	10295.2	12928.9	14587.9	10925.5		10165.2	11283.7	16498.9
P05109	P05109	S10A8_HUMAN	S100A8	Protein S100-A8	75380.8	56838.3	59188.7	200410	53407.2	70533.8	205913	76420	64302.3	95970.2	345056	66942.5	58117.1	31868.9	102929	138562	28654.2	253915	172127	276394	30766.7	34108.1	19957	42950.6	54470.1	140104		39939.1	52616.4	277680	247979	108590	118346	130674	81547	131275	349332	213292	128230	113409	83461.2	462239	52573.2	25090.8	339990
P05114	P05114	HMGN1_HUMAN	HMGN1	Non-histone chromosomal protein HMG-14	9943.11	6525.08	10555.5	6290.92	8349.4	5761.69	7354.91	8488.71	6377.37	17351.7	7338.93	9330.92	4862.24	4559.88	3454.97	16622.5	6887.46	5844.4	8348.28	6016.1	4840.72	6851.08		5783.73		3771.8	3723.46	3422.74		6600.53	7903.08	4941.5	8086.01	5048.45	4286.83		5769.15	8187.31	4623.16	5790.78	2351.32	5937.89		6398.11	3667.36
P05120	P05120	PAI2_HUMAN	SERPINB2	Plasminogen activator inhibitor 2																												6993.74														6384.19	8050.78
P05129	P05129	KPCG_HUMAN	PRKCG	Protein kinase C gamma type	99523.3	97491.4	94806.6	105667	85942	213149	232898	122671	146205	187003	110059	115054	203672	203256	208392	250302	301056	161424	71879.3	36480	135231	116798	134633	152073	233678	122844	294068	201207	207275	111717	115082	94006.2	130447	116402	154740	78532.3	190270	79809.3	208737	223984	153244	130569	199028	80928.9	97895.6
P05141	P12236;P05141;P12235;Q9H0C2	ADT2_HUMAN	SLC25A5	ADP/ATP translocase 2	471970	402525	348758	477877	382650	697079	794707	393840	495202	814688	407234	537758	949207	909898	669515	1012440	708553	320665	352348	825253	625513	452469	733470	761696	782415	669797	1115480	785420	875989	445602	550040	888891	675788	704232	522756	792115	835956	1179750	877465	1147380	1272070	860067	1222360	1113650	624077
P05155	P05155	IC1_HUMAN	SERPING1	Plasma protease C1 inhibitor	55494.2	25882.9	54195.8	28742.2	27192.8	36123	43361.1	41415.9	40037.7	43109.9	26281.1	46315.4	24450.3	22482.3	32529.1	37121	36348.3	21520.6	41409.5	50968	27401.3	51295.5	37057.5	38218.1	36865.8	24524.2	32319.5	39409.5	48152.1	42866.7	31839.4	49591.8	38245.6	29278.5	20867.4	42727.3	34529.5	49668.9	51655.9	39447.5	33108	68955.1	47461.3	75851.8	51098.2
P05161	P05161	ISG15_HUMAN	ISG15	Ubiquitin-like protein ISG15	3773.18				3678.96	2591.27	3206.47			4508.53			2043.8	1868.08	2415.83	6959.7	2317.82			2342.92		2360.3		6465.59	2268.42	2190.89	3101.85	4435.02	2514.9	2285.1		3479.38		2573.39			3401.69	7909.19	2551.94	1893.21	2389.63		2169.52		7142.19
P05164	P05164	PERM_HUMAN	MPO	Myeloperoxidase	8633.93	4406.06		12800.2	4981.23		9204.78	4639.89	8626.04		4416.8	11890.6	8984.44	6244.8	4167.41		9457.47	16361.4			5766.7	12324.2				6224.76		9602.98	6453.18	14652	13186.1	15288.9	9901.68	51027.2	7318.68	12036.5	12978.6	7704.81	11211.8	15470.4	14801.3		9389.29	13606.5	18738.9
P05165	P05165	PCCA_HUMAN	PCCA	Propionyl-CoA carboxylase alpha chain, mitochondrial	31904	25710.8	25837	28418.4	46119.6	49185.3	45985.2	31255.3	29582.8	33950.2	32753.1	25283.6	46160.8	52731.2	49362.9	61934.5	51729.7	34224.2	33348	43466.7	33783.2	33948.1	29416	51039.5	53340.3	47727.4	56853	54264.2	57179.9	34328.4	37862.8	44282	37041.1	27809.4	32066.6	32464.9	55454.4	52126.5	40032.9	58658.6	55710.3	41539.5	58913.4	43567.1	31324.3
P05166	P05166	PCCB_HUMAN	PCCB	Propionyl-CoA carboxylase beta chain, mitochondrial	38587.9	31264.2	34712.1	35754.1	53414.1	58679.1	56001.1	33313.6	35331.1	48833.9	38567.5	33652.6	52023.9	62155.7	58597.3	70983.6	61955.3	41394.4	38382.4	55417.7	45419.4	43688	44233.7	60840.8	62562.9	62245.1	70312.2	65179	64517.2	36597.5	45328.3	52917.7	41338.4	37573.7	37843.2	44523.4	62307.2	60913.3	50929.4	63753.8	66125.8	54200.4	72679.8	61747	35358.4
P05181	P05181	CP2E1_HUMAN	CYP2E1	Cytochrome P450 2E1
P05186	P05186	PPBT_HUMAN	ALPL	Alkaline phosphatase, tissue-nonspecific isozyme	9843.07	5869.33	6608.88		11424.7	7177.57	9536.23	7778.92	8896.02		9965.15	8286.13	9809.44	8764.39	7694.64		7331.25	7826.43		10308.5			9752.79	11906.8	5903.02	7670.1	6813.24	12466.1	16032.8	5549.94	12698.6	15653.2	7500.22	6319.97	6085.67	8275.68	8338.53	23228	9889.65	9091.66	8681.37		7180.62	14931.6	6771.45
P05198	P05198	IF2A_HUMAN	EIF2S1	Eukaryotic translation initiation factor 2 subunit 1	53048.4	48978.4	51291.6	47400.4	53044.2	53233.4	55375.7	53149.5	46459.4	81997.9	51748.6	51882.1	45954.8	49825.4	55271.6	68399	47688.3	54238	53862.6	48187.6	46066.2	49124.4	57936	55599.6	48991.4	52583	44252.2	47202.4	65204.9	50142.3	53783	52561.8	51229	56138.8	52923.6	46221	45185.7	52269.6	54717.9	46358.6	46913.1	51109.9	48130.5	53675.9	53040.2
P05204	P05204	HMGN2_HUMAN	HMGN2	Non-histone chromosomal protein HMG-17	11788.7	7764.31	10662.9	13465	2423.69	6871.46	12176	15847.5	11368.1	25242.4	16047	17188.8	4219.93	5953.47	8194.95	20202.6	6385.79	7498.39	6651.49	5248.76	5956.01	6929.79	4908.1	3956.54	6037.21	2864.52	2420.77	3349.62	2867.75	8507.55	13762.4	4855.96	9612.38	6501.79	5168.05	7575.22	2517.51	14417.4	3153.25	4967.55	2370.6	5302.03	3341.2	12369.1	4366.93
P05230	P05230	FGF1_HUMAN	FGF1	Fibroblast growth factor 1	130860	148919	140936	139165	81899.2	81092.2	94483.8	173298	135816	255439	206388	148014	88831.5	70996	74313.5	279382	68797.1	182649	139251	124049	189996	118975	202840	86189.5	70017.8	90636	57184.1	38316.7	69357.6	140461	141974	83769.8	149319	120478	193052	156592	70751.6	81575.9	59048.5	60614.7	80600.2	78184.9	84554.5	114299	140107
P05362	P05362	ICAM1_HUMAN	ICAM1	Intercellular adhesion molecule 1	11036.8	10855.6	17451.5	11022.8	8029.85	12099.5	12147.6	12300.8	12369.5	10152.5	9239.02	12783.9	20945.8	13411.2	9572.63		17859.2	11190.9	12362.1	8488.72		14548.1	11413	16942.8	15396.6	8541.14	7109.16	6275.58	9560.62	8095.05	9826.19	12282.9	8869.67	7054.35	11388.2	8373.54	7889.55	9518.66	6984.23	7048.91	8955.92		9161.66	6521.32	11032.8
P05386	P05386	RLA1_HUMAN	RPLP1	Large ribosomal subunit protein P1
P05387	P05387	RLA2_HUMAN	RPLP2	Large ribosomal subunit protein P2	86891.4	72047.5	76124.1	84265	86981.1	106756	87869.9	105216	87064.3	127865	71861.4	100938	115870	101006	124346	97562.4	76370.3	96645.7	76377.2	101429	76653.3	68380.4	73842.8	137914	80189.9	98751	106204	122377	110563	99751	88602.1	92513.9	102769	97859.5	90825.3	82300.1	102336	108404	97600.2	126785	124243	107490	126954	102475	80713.5
P05388	P05388	RLA0_HUMAN	RPLP0	Large ribosomal subunit protein uL10	58035.5	38311.8	48820.3	52372.4	51028.5	66394.4	62243.8	56439.4	50250.8	57461	50365.9	59583.8	75657.6	64443.2	63225.7	35575.3	50653.3	60716	43552.6	57190.3	55082.1	46739.4	54237.3	98619.5	53560.9	58282.6	52467.6	61405.7	71085.3	55543.1	58859.5	46880.5	55729.6	52302.4	41477.4	53998.8	68799.5	105230	60424	63285.3	62073.1	58296.6	70432.1	60572.6	45568.9
P05408	P05408	7B2_HUMAN	SCG5	Neuroendocrine protein 7B2		7425.89			64581.3	168983	149491		12966.1	56078.3			199022	132995	157340	289430	186483			28601.7	28058.8			98929.2	133987	107441	237175	177709	145569	11848		80883	18497.8	17810.5			141276	21141.8	161155	201486	189266	119304	184040	22390.9	19066.9
P05413	P05413	FABPH_HUMAN	FABP3	Fatty acid-binding protein, heart	221489	170088	148035	141420	126701	174293	169854	148905	213628	319107	192912	227343	149337	177381	153495	215782	199408	169311	132220	204300	180181	136763	161988	162694	181800	146622	226639	116827	171358	203974	215262	125605	183077	218948	175449	187706	137569	224416	156107	162168	165356	124241	171091	271652	229034
P05455	P05455	LA_HUMAN	SSB	Lupus La protein	12512.7	8171.74	12625	14239.8	9469.72	10432.2	8977.49	14197	12115.8	21928.1	9537.23	15000.5	9800.53	10788.8	10281.5	12430.5	9152.97	10022.8	8710.83	11001	8837.28	9711.03	10666.1	9715.53	9158.7	9349.12	8476.03	8462.06	8745.96	8237.93	11905.6	10474.3	11164.2	9758.08	8903.47	11479.3	6974.32	14164.5	7790.45	9419.82	9520.86	13049.8	9859.62	11278.6	9417.02
P05546	P05546	HEP2_HUMAN	SERPIND1	Heparin cofactor 2	11280.8		6988.34					6122.93					4910.75	4490.33			4701.51			6226.5		4818.62	4876.67					4855.36	7701.16		6549.51	8281.48	8915.4				3166.61		7723.01	10865.4				8147.99	5347.14
P05556	P05556	ITB1_HUMAN	ITGB1	Integrin beta-1	55062.7	46959.7	50104.2	43999.2	61071.8	33635.9	29147.7	53945.5	40975.5	28297.8	43698.8	38093	45878.9	31927.6	38852.8	28325.8	45712.9	55285.8	54077.8	44292.5	40494.2	45013.3	38048.1	36688	45517.6	39435.8	27817	28464.2	40154.7	48287.3	54782.6	37252.7	46166.1	41188.4	44796.7	46152.5	41629	43551.3	34120.4	33455.1	34594.3	35259.8	39275.3	47660.7	50053.7
P05771	P05771	KPCB_HUMAN	PRKCB	Protein kinase C beta type	148923	177742	154068	147390	192380	189148	185230	145019	172129	212554	156129	129142	269017	285648	179881	378205	275039	156845	126225	83913.2	180570	149754	188261	236903	268662	233559	283700	286688	258158	180027	164885	121973	169693	189991	196427	186575	292021	112327	410410	288668	341027	260111	332230	113085	169991
P05783	P05783	K1C18_HUMAN	KRT18	Keratin, type I cytoskeletal 18																				17349.1					6352.77			5308.76	6606.35		9578.41	12205.1						10039.2						13333.4
P05787	P05787	K2C8_HUMAN	KRT8	Keratin, type II cytoskeletal 8
P05937	P05937	CALB1_HUMAN	CALB1	Calbindin					33061.2	95706.9	36636.6			25619.1			115436	161547	96297.3	41329.9	185377	15645.1		46530	11888.4			64882.8	117984	96207.1	148229	128551	129560	19642.5		33847.2	10194.9				122201		143828	152918	84895.4	58607.5	129185	9480.05
P05976	P05976	MYL1_HUMAN	MYL1	Myosin light chain 1/3, skeletal muscle isoform		34983.1	34836.7	25606.7	21022.4			79924.1	24337		42345		21510.1	40019.7	24477.9		50326.3	50643.1	64257.4	33334.3	40216.5		46889.8			32590.1	17331.9		40702.2	32533.4	30382.7	28584	46713.7	58246.6	54450.3	55908.3		29691.9	22638.8	23462.8			19868.1	44986.1	44493.4
P06132	P06132	DCUP_HUMAN	UROD	Uroporphyrinogen decarboxylase	12671.5	12213	11971.1	10143.1	12620.1	13103.2	12639.9	9973.18		17795		13430.1	14019.8	7491.6	14670.5	5845.63	12765.1	13482	13743	15894.8		11223.9	9558.75	17549.8	14197.8	13733.8	13951.6	12559	15029.7	14530.6	15289.2	13456.8	14051.3	12239.4	9763.4	14520	17966.1	17123.3	14070	13779.2	14727.8		10357.2	19562.2	12651
P06213	P06213	INSR_HUMAN	INSR	Insulin receptor	6357.38	5195.2	5631.81	7980.06	5805.99	3929.49	4533.77	8089.58	6466.78		5260.32	7851.52	5129.77	6049.56	5614.39	14829.7	5308.55	6417.23	3903.02	8629.19	7522.01	6079.2	5745.25	5236.38	6027.05	6861.3	5291.26	4607.01	5859.81	5593	6274.76	8471.82	7400.17	6175.04	7633.1	6907.97	5577.85	8911.81	5369.69	6144.21	6371.08		6808.66	9139.41	6963.98
P06241	P12931;P07947;P06241	FYN_HUMAN	FYN	Tyrosine-protein kinase Fyn	74755.5	72774.9	84449.6	79893.2	66368.2	86449.8	88327	77278.6	70080.7	76852.4	82165	70460.3	91389.5	93079.8	76733.4	101525	95855.2	86363.9	69481	67576.9	79306.4	79731.3	80547.6	88960.4	87814.9	88612.6	80935	83154.9	75089.6	83589.3	76635.7	73951.9	86805.5	73846.8	84292	81656	107088	75810.9	80780	80534.2	93406.4	68661.9	75885.3	69279.8	79994.8
P06280	P06280	AGAL_HUMAN	GLA	Alpha-galactosidase A					6597.82	6707.25	7110.98							4714.37	7358.11									6392.1			5271.7	6247.6					5137.66				6994.91		4566.89	5192.74	4795.44		5557.85
P06307	P06307	CCKN_HUMAN	CCK	Cholecystokinin						13762.8	11483.4						9235.38	5391.28			10075.9								6376.18		19294.4		11309.6			12130.2											8338.07
P06312	P06312	KV401_HUMAN	IGKV4-1	Immunoglobulin kappa variable 4-1
P06396	P06396	GELS_HUMAN	GSN	Gelsolin	675035	649198	722898	542279	316483	307234	312477	653507	734311	724783	809139	665922	320463	245714	322503	559687	285456	816213	687161	415978	642045	618951	634896	320831	271936	285247	218178	223158	233766	777759	774604	353022	764415	738808	758977	712400	340571	535104	264725	281909	317922	387019	273315	460428	703004
P06454	P06454	PTMA_HUMAN	PTMA	Prothymosin alpha	411880	203850	201485	309888	195596	63662.5	119317	512629	253106	482222	288192	234643	194935	103544	81048.8	367878	65359.7	374522	229150	230613	330569	199920	205656	97876.9	114989	151089	112734	96685.6	78751.1	229808	359346	63258.6	500791	251345	221463	230347	82236.3	266482	83870	203274	122430	271338	77997.3	164755	165754
P06576	P06576	ATPB_HUMAN	ATP5F1B	ATP synthase subunit beta, mitochondrial	1065530	860119	1064790	871545	1858150	2276810	1920780	1021970	1099400	1755790	1240440	1051340	2032290	1755550	2066490	2316050	1920240	1280280	1106770	1793480	920769	1080460	886777	2106220	1560250	1778000	1755310	1767820	1950960	1128700	1555930	1896820	1297940	1154130	1082390	1192800	2328360	2908120	1993200	2127640	2372060	1978570	2185280	2061470	1100730
P06702	P06702	S10A9_HUMAN	S100A9	Protein S100-A9	73242	60959.3	72940.7	242968	63352.1	59364	185951	112670	90390	176231	452888	230059	52788.6	36146.2	101792	188735	28934	273831	197618	274956	42615	33461.5	39292.1	42552.9	61921.9	151559	15175.6	37395.1	56516.5	263436	263314	128584	123211	133285	79627.6	152752	337534	192107	139772	113573	82490.5	578985	47982.1	27805.4	451370
P06703	P06703	S10A6_HUMAN	S100A6	Protein S100-A6	147167	145994	237682	145135	182788	154522	97534.1	176165	202704	258326	242230	78120.6	230957	246022	132264	182350	265916	220791	314199	204426	299017	167474	483268	105794	320889	203262	151233	129587	203694	235931	222791	165860	162245	146216	206270	301337	201373	375250	182591	139642	185647	54325.4	212999	206457	284366
P06727	P06727	APOA4_HUMAN	APOA4	Apolipoprotein A-IV																			15582.5	7827.61			10902.1	6813.5	16541.7				14244.6							7918.24					6267.92		9911.42	7479.7
P06730	P06730	IF4E_HUMAN	EIF4E	Eukaryotic translation initiation factor 4E	14573	20721.1	22588.6	13902.8	20937.3	20069.1	19183.5	23209.4	17756.7	22912.8	28573.5	19407.4	23509.4	23383.1	30336.2	36895.9	18071.6	21112.4	21920.1	20123.4	25319.5	22031.7	22128.7	20251.9	19986.6	20773.9	29291.7	28912.5	21058.8	21052	22060.6	35238.1	30094.2	24587.6	24793.4	26789	21362.6	21428.4	31768.9	30301.6	19259	25462.9	29830.5	24458.7	28944.4
P06732	P06732	KCRM_HUMAN	CKM	Creatine kinase M-type			19474.8	15437	15422.5	18453.8		20543.5	17044.1	12532.8	15186.4	8972.3	20587.5			17548			11766.8	11456.4	10748.5	13423.4			10838.8	54235.1	12772.3			13580.2	13009.7	9755.4		13222.9		12686.3	15074.2	14432.5	12017.9				12205.1	13362.9
P06733	P06733	ENOA_HUMAN	ENO1	Alpha-enolase	1749080	1567810	2066960	1571200	1446180	2175890	2011760	1977530	1989550	2737820	2268030	2277700	2565840	1670230	2049250	3481840	2070240	1697680	1305330	1549910	1523610	1022230	1531730	1484470	1152500	1209860	1561710	1073800	1249220	1954950	2990180	1429370	1503700	1858610	1624910	2531830	1701430	2975930	1414540	1443230	1665760	1182680	2128990	1807160	2023130
P06737	P06737	PYGL_HUMAN	PYGL	Glycogen phosphorylase, liver form	10511.9	8184.45	11396.3	11453.8	13851.6	18988.9	15704	11079.6	9214.15	17194.7	10109.1	9397.37	15547.4	13472.6	13449.2	23769.4	13383.7	11663.2	10745.5	9169.1	7982.09	9391.53	12564	20220.9	10532.8	12746	12995.3	14268.8	18046.8	12018.5	11292.5	8072.77	11580	10760.3	10585.3	10742.5	20336.7	10052.5	14103.2	16957.9	18090.3	16289.6	14603.3	8706.81	10384.5
P06744	P06744	G6PI_HUMAN	GPI	Glucose-6-phosphate isomerase	964161	963588	851628	856056	827116	976018	1085620	759221	1030740	1356170	919111	882230	1057040	1016370	881350	1411500	1202900	931087	881952	778660	941412	926644	918005	998512	1067320	856217	1222250	1039620	907932	1043370	1002640	928016	909480	1004260	932918	968880	1121870	785028	1197160	996237	1216560	1019450	1139650	944564	957321
P06748	P06748	NPM_HUMAN	NPM1	Nucleophosmin	27496.3	33221.6	28581.6	32511	29663.6	31939.7	25390.8	28201.3	25162.1	36878.9	27046.1	30902.4	28751.4	24260.2	37381.8	25252.7	20391.7	35289.6	21687.3	26677.6	25723.4	33377.4	25799.7	21989.1	20164.1	24960.5	31306	48564.5	28784.4	27570.4	30469.7	29291.6	36553.1	35092.2	38333.5	29443.9	27313.3	41088.4	25881	29227.9	32182	22197.4	35780.8	17349.8	31757.7
P06753	P06753	TPM3_HUMAN	TPM3	Tropomyosin alpha-3 chain	312217	299682	279500	282479	299115	220278	232235	245560	281767	162990	224196	270151	319162	212817	168288	1010930	252958	268664	258100	358510	248717	248967	243516	311562	193248	275932	200180	212974	217944	370506	389948	282197	262646	274420	279550	268721	346864	300646	279524	301486	320718	515950	222667	272120	336314
P06756	P06756	ITAV_HUMAN	ITGAV	Integrin alpha-V	23568.4	23923	23553.7	21394.8	31461.2	20529.5	20656.3	27677.6	22541.3	13310.2	21369.1	24341.3	31146.8	26677.1	22439.4	11645.6	30277.6	26742.4	24901.9	29520.8	22693.2	26860.8	24073.9	20692.8	24557.3	30970.7	22505.4	19591.4	23500.5	24116.1	25028.9	26751.3	22690.3	20900.9	23844.7	26369.6	23111.8	24102.8	20221.8	23306.4	25979.7	16434.1	22097.8	30081.5	26478.9
P06858	P06858	LIPL_HUMAN	LPL	Lipoprotein lipase					9874.58	10612.3	7750.71						9062.94	9067.86	11278.7		13609.9							10036.5	9786.59	7548.38	11911.3	9489.68	14485.8								9467.81		13113.7	11764	14309.8		9028.08
P06865	P06865	HEXA_HUMAN	HEXA	Beta-hexosaminidase subunit alpha	11747.7	11976.5	8420.49	9849.73	12630.9	11147.7	10384.9	11444.5	9758.81		10746.7		14643.6	13191.4	14583.1	17257.4	9329.49	11305.4	13207	12766.6	13646	11187.6	11286.3	14795.4	10648.6	11725.9	13935.2	16076.7	10770.8	10907.9	14765	8530.11	13600	12337.6	9875.79	9841.77	15943.5	9934.34	10950.4	16819.7	18634.8		9656.98	8521.59	11766.6
P06899	Q6DN03;Q16778;P23527;P06899;Q6DRA6;P33778;Q8N257	H2B1J_HUMAN	H2BC11	Histone H2B type 1-J	220432	114388	157245	187970	47239.9	86492	97172.9	169794	152115	122075	267050	243131	113922	90346.6	115252		109818	142076	132995	108806	127162	68472	129893	77266.5	83176.3	58585.6	36460	31487.2	55443.3	149457	317102	77359.3	124283	155373	88142.4	151834	75736.3	311143	59755.9	85587.9	77295.7		90550.6	180289	81095.4
P07093	P07093	GDN_HUMAN	SERPINE2	Glia-derived nexin	18591.3	13069.9	8950.1	13749.3	16215	16225.3	19048.6	16497.7	12732.7		8777.8	15162.1	26300.8	19403.5	20311.3		22490.2	13940.6	17261.8	20384.3	18007.2	16277	18469.4	19033.8	27971	22742.7	30274.4	30045.4	21483.6	19476.2	15130.4	31550.5	14299.7	10566.4	18296.5	18988.8	27377.4	16297.5	29417.6	22843.2	19590.2	21797.2	33463.8	27840	16822.9
P07099	P07099	HYEP_HUMAN	EPHX1	Epoxide hydrolase 1	90992.9	86112.9	93329.3	49473.3	143536	138404	113674	71814.7	77048.9	111203	107805	62697	140974	112342	138130	157588	158837	107997	85931.4	111248	89828.2	66367.6	80499.7	157809	151480	112277	132886	107920	143293	85270.3	79409.6	136376	106857	79523.2	101585	90513.6	193167	120207	133920	166136	159286	128758	160078	134421	90145.6
P07101	P07101	TY3H_HUMAN	TH	Tyrosine 3-monooxygenase					203476	318669	365753			45366			282893	298365	315958	465063	97273.4			40522.6				308924	225719	172936	259254	467461	383284			31509.6					291136		329740	409984	307230	226999	226267	46970.6
P07108	P07108	ACBP_HUMAN	DBI	Acyl-CoA-binding protein	461182	328359	360796	339779	208306	288693	267771	445637	497927	501007	434416	591339	305349	236033	361206	765517	290401	290379	192538	297988	270716	175152	171993	161572	165621	277370	238663	118888	204679	310206	516515	206636	395936	348926	423876	395628	184424	453786	101165	215659	291821	300013	204407	221747	385565
P07195	P07195;Q6ZMR3;P07864;P00338	LDHB_HUMAN	LDHB	L-lactate dehydrogenase B chain	1961030	1917990	2341530	2050540	1689600	2622190	2498250	2257650	2621200	3715600	2340880	2679850	2372780	2070920	2671960	5051770	2338080	1727550	1614900	1934570	1998600	1614210	1925600	2146890	1895690	1910910	2416550	1710170	1870270	2184640	2517940	1719390	1938420	2418730	1702790	2568150	2069260	2545350	1786930	2095560	2421830	2202890	2646190	2752260	2087650
P07196	P07196	NFL_HUMAN	NEFL	Neurofilament light polypeptide	7390230	8882550	7077690	7530550	2141240	1841180	1768400	5759100	8082140	4627200	5336110	7158130	1797010	1709520	1792370	3612010	1441910	5551730	7401940	5825950	5242350	6163260	4910450	2088850	1526460	2111260	1284040	1346080	1601400	8538210	8622220	1546550	6029040	9278840	5287380	8563690	2154410	4272800	1919770	1741630	1815280	1687610	1763260	4595590	8550540
P07197	P07197	NFM_HUMAN	NEFM	Neurofilament medium polypeptide	4846410	5227500	4909950	4646050	1348000	1400560	1187830	4059140	4822510	5567340	4451520	4554790	1284180	1312150	1355090	4057200	989569	3448010	4418210	3544960	3254490	3863220	3285790	1294410	1016830	1374900	880816	914779	1077970	5003300	4869380	1048390	3657280	6178820	3249230	6352650	1518220	2738090	1417290	1310030	1305100	1576190	1462600	3294050	5505140
P07203	P07203	GPX1_HUMAN	GPX1	Glutathione peroxidase 1	135459	110246	115490	115283	72552.9	110140	88748.1	106872	134483	105049	104852	119395	125224	115865	101558	112307	137012	97705.4	109491	120695	96415.8	92732.9	88362.1	88219.2	118371	104596	113021	88732.5	89082.6	103399	129426	94877.3	138414	102974	103070	103017	85105.1	147064	81150.2	133233	109624	104448	99902.6	133861	108134
P07205	P07205	PGK2_HUMAN	PGK2	Phosphoglycerate kinase 2					5291.19	8377.57					14996.9				15136.5											23525.5
P07225	P07225	PROS_HUMAN	PROS1	Vitamin K-dependent protein S																																4823.08												7914.43
P07237	P07237	PDIA1_HUMAN	P4HB	Protein disulfide-isomerase	108463	91569.3	89946.1	86878.1	102969	127054	136147	93789.1	100990	132834	92016.3	104292	126409	112655	141461	230105	110917	102400	76035	95530.6	84169.7	74107	75704.3	144302	103909	111655	136991	107045	115730	100549	107125	103922	109780	90365.5	99158.8	92159.3	132053	155110	109932	127754	137608	115958	115239	97486.2	88674.8
P07305	P07305	H10_HUMAN	H1-0	Histone H1.0	147036	95746	111254	147939	95683.1	71613.9	104483	114728	110376	96656.7	92593.6	164771	89601.4	54693.2	64415.6	183591	88727.1	90447.2	95038.9	113976	75299.8	84363.7	83232	76321.6	65502.6	60253.3	43100.3	43241.3	49402.7	109910	168151	72818.8	98988.7	87190.9	77589.7	113764	71369.4	171797	50349.7	51516.2	64466.8	47942.8	63846.4	113090	84052.2
P07311	P07311	ACYP1_HUMAN	ACYP1	Acylphosphatase-1	27988.7	30997	25540.1	28800.6	21121.3	30359.4	30911.8	33028.5	29506.8	29278.9	24923.7		17493	33687.7	26252.4	21121.2	42253.8	32455.5	21297	23885.9	40635.1	32981.1	31852.4	25922	35721.2	20964.8	28880.1	19044.7	27192.7	29539.9	25038.6	43848.1	30573.6	39990.2	30978	28334.7	20471.7	21292.6	31165.7	24620	23891.6	18483	19233.5	32872.8	30021.2
P07320	P07320	CRGD_HUMAN	CRYGD	Gamma-crystallin D
P07333	P07333	CSF1R_HUMAN	CSF1R	Macrophage colony-stimulating factor 1 receptor																																						10884.6
P07339	P07339	CATD_HUMAN	CTSD	Cathepsin D	278802	224402	234939	308766	400277	468168	410936	286866	280789	390599	359489	315109	538014	459375	537233	476440	367636	329867	361219	298476	333902	208019	334986	460827	382508	436381	336381	366436	395686	294320	488271	238136	229758	277386	188134	269868	553838	522798	324523	384878	407809	416145	397109	420201	348914
P07355	P07355;A6NMY6	ANXA2_HUMAN	ANXA2	Annexin A2	104298	120165	120275	88484.5	88837.4	59853	56854.3	92828.8	101746	123492	102474	151832	75239	49506.4	63010.6	149884	83147.1	122444	133926	104968	74641.6	115814	114172	58363	55981.5	83355.5	42462.7	70326.2	70766.2	149690	164092	66013.9	87394.5	85556.9	84354.5	104822	106987	106949	44512.3	54466	56336.6	134731	73979.1	62649.1	173487
P07384	P07384	CAN1_HUMAN	CAPN1	Calpain-1 catalytic subunit	161120	176261	173795	174234	89371.4	102893	106313	159190	167200	168323	163367	153780	103485	109821	114105	159789	112663	129640	190787	133046	179408	172922	169898	92184.2	117536	106940	100991	106333	98730.4	176895	160607	122632	167412	191549	164330	186466	112672	115680	118866	94592.7	116088	166804	118379	130462	204152
P07437	P07437	TBB5_HUMAN	TUBB	Tubulin beta chain	792209	699364	796663	692935	330248	572559	487617	770537	776264	611663	606500	713494	540974	472528	501380	457166	627046	843873	649051	662179	494903	676318	598181	467559	547800	380798	438209	391187	484588	868738	895390	642509	565316	726685	539896	733996	539967	537887	396519	418967	383517	331892	485381	417175	655124
P07451	P07451	CAH3_HUMAN	CA3	Carbonic anhydrase 3	9376.35						4636.42								2428.06					7077.43						3845.76																		7847.33
P07476	P07476	INVO_HUMAN	IVL	Involucrin																																										11326.8
P07477	Q9BYE2;P07477	TRY1_HUMAN	PRSS1	Serine protease 1	100024	90397.2		58786.7	27942.2				72456.2		80521.7		80556.5	35820.5			39394	49903.8	63177.7				174149	33649.5	31552.8	40401.2			26664			92131.8	101755	71048.5		85161.2	62440.3		84468.3				56238.7	107754	128004
P07602	P07602	SAP_HUMAN	PSAP	Prosaposin	36098.6	24298.1	27504.5	26725.5	22130.2	31617.5	39781	20337.2	42580	48422.4	22260.5	52339	33668.7	42658	31289.4	78628.8	40249	20848.1	30530.3	27982.1	17645.3	13759.7	16287.7	44028.4	47803.7	22347.9	42858.1	23688.5	43896	25455.4	34647.6	27931.7	23108.4	24090.1	13436.8	28258.9	30023.5	45862.8	26263.3	30089.8	30247.7	26175.4	44511.3	34845.6	24053.1
P07686	P07686	HEXB_HUMAN	HEXB	Beta-hexosaminidase subunit beta	16069	15027	10959.1	16068.1	33430.7	17675	20138.8	16113.5	14383.6		22324.1	11443.7	30711.7	31187.8	24629.7	82043.8	23150.2	28631.3	24326.7	22823.1	24186.9	15214.4	21162.4	19792.2	27314.1	29416.6	23021.4	31211.2	24449	27384.6	24734.7	15766.2	27429.3	19080.9	12859.9	21463.1	38026	16767.7	27667.7	31758	30630.8	34750	22559.5	18097.3	25385.8
P07711	P07711	CATL1_HUMAN	CTSL	Procathepsin L						3716.62	4334.59				2946.91		3761.48		4929.1									3732.51					2912.21					3435.69			4124.27			3505.25
P07737	P07737	PROF1_HUMAN	PFN1	Profilin-1	210555	197584	208829	197867	165720	157178	167281	225249	251282	331039	261249	198124	169297	119392	114652	341906	141840	209118	190786	130995	206568	140518	245083	138711	108291	145674	114845	89730.7	103934	219577	227181	124314	187310	187572	186166	207185	138549	181309	135622	129935	118949	205826	127650	153524	167348
P07738	P07738	PMGE_HUMAN	BPGM	Bisphosphoglycerate mutase	15182.6	12861.5	14202.9	13180.2	10013.3	11898.7	14045.7	11340.4	14887.3	16190.4	12516.2	17490.3	9650.65	10627	8778.52	29791.1	11338.6	9136.79	10231.4	14768.2	8014.16	15090.6	9287.79	12241.6	9986.56	8940.87	9504.1	9295.69	9329.34	11508	12801.3	13474.1	10917.8	10482	11613.7	12727.2	9351.73	10792.6	10544.9	11298.6	12181.6	12968.4	10120.7	13184.1	14185.2
P07741	P07741	APT_HUMAN	APRT	Adenine phosphoribosyltransferase	190604	200490	169197	193534	223702	143888	107846	209737	142277	249836	197896	179925	185798	160388	127756	421276	180726	228771	233687	183672	180537	150045	169915	126009	162493	142450	90914.4	118166	106306	182018	201384	133933	199350	174155	160272	184861	142202	146198	140458	151850	157120	152679	115656	157391	154158
P07814	P07814	SYEP_HUMAN	EPRS1	Bifunctional glutamate/proline--tRNA ligase	40495.9	36105	35692.9	40197.4	61331.2	60948.7	41836.5	34807.4	35478.2	55981.1	33834.6	32783.6	43453.6	48499.8	71339.1	98993.7	36726.2	34216.1	30709.6	41396.5	31848.1	34863.1	30938.2	63604.3	38376.3	43798.6	49171.2	68441.5	54352	37671	42005.5	42036.2	38035.1	34451.5	39499.4	36825.4	47084.5	61476	58268.8	52389.4	37856	56656.6	55530.7	42123.1	36606.4
P07858	P07858	CATB_HUMAN	CTSB	Cathepsin B	55514	69688.1	44060.2	72277.6	172919	228645	159783	64723.1	62021	52546.2	67693.9	43280.2	221023	150513	377737	195938	118379	76269	87137.4	85311.8	85551.2	44309.7	64935.2	173906	167712	175502	145294	199241	170864	125223	110936	75934.8	95875.8	78130.2	79076.9	67511.5	278250	92625.3	168840	224067	168804	181189	165722	84443.5	82549.5
P07900	P07900	HS90A_HUMAN	HSP90AA1	Heat shock protein HSP 90-alpha	1561230	1675750	1610800	1457920	1265300	1910100	1826510	1409090	1686770	2109020	1556560	1791800	1599200	1394180	1574890	4261170	1556340	1357230	1133830	1370060	1067460	1132010	1199340	1793490	910427	1235140	1510710	1256470	1612200	1494280	1689220	1585600	1616470	1950560	1359900	1861800	1228590	1747510	1714760	1868690	1590200	1755940	1909850	1354080	1548040
P07902	P07902	GALT_HUMAN	GALT	Galactose-1-phosphate uridylyltransferase							7020		6853.51					4331.71	11886.1												6676.29	6781.67	5320.11			7709.11				4634.99
P07910	P07910	HNRPC_HUMAN	HNRNPC	Heterogeneous nuclear ribonucleoproteins C1/C2	123909	102390	109946	114197	75155.1	85183.5	87258.5	97600	103578	135287	97582.5	118424	87616.8	68777.8	64808.4	173534	69181.4	92549.9	84401.6	92352.4	93836.7	90053.9	98899.3	77691.9	57697.1	59812.3	58355.1	60836.1	63436.3	89533.7	122040	88613	101691	94418.4	100872	104776	62441.5	152583	64169.9	71618.1	62966.4	54982.2	71955	98778.1	87911.9
P07942	P07942	LAMB1_HUMAN	LAMB1	Laminin subunit beta-1	10273	11530.3		12150.9	12427.1	11166.9	13951.5	6714.97	11297.9	8265.25		17348.1	5980.18	8015.35	9469.94		12932.5	12076.2	10189.1	8624.21	6273.04	11114.8	4327.39	12542.4	7990.35	8461.33		7884.28	10499.9	10730.8	12460.9	16145.6	14960.5	10101.8		5842.48	10511	13342.7	11268.2	10100.2	9433.69	15978	5653.7	8996.53	14011.3
P07947	P07947	YES_HUMAN	YES1	Tyrosine-protein kinase Yes	21221.7	20148		22070.5	19097.2	14556.3	12835.8	19578.3			45226.4		27323.7	31009.2	16304.1			44393.7	34011.9	25935.2	49072.4		53879.2			28481.3	10856.1	16368.2		34307.3	31420.9	28388.7	31991.7	22640.2	27515.3	38917.9	30474	15789.8	20050.9	16683.5	16827.8		14936.6		37625.3
P07949	P07949	RET_HUMAN	RET	Proto-oncogene tyrosine-protein kinase receptor Ret					3555.37	7476.6	6628.8						7175.99	5849.09	7034.45	17052.5								7277.17		5793.14		6035.2	7047.77								4584.07		6070.95	7655.23	7745.86		4995.48
P07951	P07951	TPM2_HUMAN	TPM2	Tropomyosin beta chain	18834.7	9968.17			35760.2	10054	16222.9	14111.1	10077.4	28712.9			22241.5	15519.4	7874.88	57766.3	18353.8	18287.1	12062.5	23166.3				17178.8		13515.2	11985.5		16903.5	23667.3		15612.5	13131	14394.1	11177.3	16077	19281.5	20921.1	15073.7	20839.7		31988.8	13142.9
P07954	P07954	FUMH_HUMAN	FH	Fumarate hydratase, mitochondrial	137566	128866	140308	132211	227859	208917	175831	152485	140165	127538	186956	131023	210200	222107	227158	150991	225384	150200	156766	190625	150125	129323	129610	186499	208197	205688	211623	189977	193256	129940	154422	193675	164140	138831	127527	131440	231050	230875	190409	216746	253723	141048	223731	197423	125780
P07996	P07996	TSP1_HUMAN	THBS1	Thrombospondin-1	11241.2		6187.58	10707.7			8608.66		11917.1			14121.6		5760.33						8479.81		7619.14				4665.44		6234.19				12772.9	8922.84	5557.01			7423.06	14367.3	9411.16	5918.02		13489.6	5787.06	9912.47	7669.04
P08034	P08034	CXB1_HUMAN	GJB1	Gap junction beta-1 protein	16741.6	17100.4	15549	18295	7591.09	6568.92			18031.4		14741.9	19120.4							15004.4	18812.4	18580.8	23525.3	12449.4		3599.59					22477.3	16974.3	7700.26	12872.9	17004.8	16837.4	15818.5			6147.6	5083.08			3543.38	20795.4	18202.3
P08069	P08069	IGF1R_HUMAN	IGF1R	Insulin-like growth factor 1 receptor
P08123	P08123	CO1A2_HUMAN	COL1A2	Collagen alpha-2(I) chain	83502	98791.2	80007.9	47944	44550.9	35962.3	36408.4	75969.2	66456	39577.8	31262.8	186879	25199.3	23798	41233.8	28410.9	54795.7	176606	238097	39934.5	56180.4	173107	62846.5	23266.4	39756.5	39661.8	28102.5	23412.5	24796.9	82304.6	146277	93807.3	101753	67547.3	78545.9	43435.2	39657.9	33809.3	30188	22480.9	21318.7	90937.6	13938	32072.7	231259
P08133	P08133	ANXA6_HUMAN	ANXA6	Annexin A6	1491770	1605170	1911850	1430600	967584	1446120	1246230	1814580	1838190	1784100	1526210	1675710	1414520	1335690	1278280	2582810	1216080	1350870	1585230	1280540	1625790	1529160	1432820	1202310	984749	1169000	1259840	978863	1269700	1550020	1660810	1046310	1697670	1999530	1593150	1782490	1138200	1466990	1298190	1450060	1345920	1482420	1154450	1167520	2086570
P08134	P08134	RHOC_HUMAN	RHOC	Rho-related GTP-binding protein RhoC
P08183	P08183	MDR1_HUMAN	ABCB1	ATP-dependent translocase ABCB1	9756.45	6583.17	8791.31	10781.3	9728.6	11249.3	11313.2	8769.89	10286	13535.2	4827.37	9457.4	10518.9	10660.8	9529.65	13607.1	12190.3	10036.5	6464.52	13612.6	6319.64	9956.11	10571.6	11736.2	9548.36	11627.2	9355.85	10816.1	13682.6	7173.12	13274.3	15238.2	11021.9	8780.6	9416.4	8566.45	13704.7	12511	10081.2	12530.4	11566.5	9909.09	12821.3	10983.2	11053.8
P08195	P08195	4F2_HUMAN	SLC3A2	Amino acid transporter heavy chain SLC3A2	239217	220177	248980	189162	228616	322978	283994	192978	222419	256746	183893	220108	328398	299323	319719	378085	271588	200511	229260	220825	184747	216310	189679	252023	280551	272411	274896	287557	312305	235966	205966	427189	242528	173054	272358	224613	267139	273866	323064	321521	298777	271066	259941	228351	276511
P08237	P08237	PFKAM_HUMAN	PFKM	ATP-dependent 6-phosphofructokinase, muscle type	265870	308243	250750	241573	223593	281636	315096	230972	303314	366010	306823	229482	247975	210269	305241	531529	239986	217887	231299	236602	269054	284392	259000	250396	216052	199481	281197	301561	214032	307929	255906	305633	281911	177271	316729	272846	283906	239004	276407	251732	157370	327853	292857	259256	278375
P08238	P08238	HS90B_HUMAN	HSP90AB1	Heat shock protein HSP 90-beta	530059	521363	535553	479360	446151	662816	675230	481826	577540	629091	564765	548186	535033	505623	538499	1633020	476356	476309	404335	485911	427386	370884	387767	626875	311075	498050	517990	432418	583414	483226	493402	591907	592933	580640	492863	575156	431634	669857	638848	691088	549107	704675	568315	482629	486699
P08240	P08240	SRPRA_HUMAN	SRPRA	Signal recognition particle receptor subunit alpha	12345.3	12084.9	13429.4	12333.7	20268.6	16577	13589.6	9837.71	9215.21		10131.8	12503.7	14927.8	13955.6	16070.7		9505.93	12389.4	11145.8	12748.8	12061.4	10866.6	11014.3	20635.6	10800.5	15826	13412.7	16908.5	16931.7	11566	13067.7	11809.1	11649.4	12530.1	9224.58	10229.1	15217	12798.3	18920.2	15968.1	15240.1		13884.8	10573.7	11518.7
P08243	P08243	ASNS_HUMAN	ASNS	Asparagine synthetase [glutamine-hydrolyzing]	19221	17065.7	10038.5		52765.3	37999.6	36491		16079.1	24210.3	4717.78	11927	29605	32775.7	38913.8	87439	14627.7	10692.2	23841.9	38899.7	10950.1	23829.3	8550.32	52328.7	34352.7	35900.9	33221.8	55574.1	50105.8	35661.8	22013.8	37766.5	11731.1	17399.3			52054.7	48657	42932.3	46784.7	37345.7	49062.6	38901.4	19731.9	19920.6
P08246	P08246	ELNE_HUMAN	ELANE	Neutrophil elastase
P08247	P08247	SYPH_HUMAN	SYP	Synaptophysin	25459.9		23133.3	37761.7	85388.2	134403	77253	22939.1	20975.5		33493.5		208081	226739	143146	60239.9	196251	34160.6	22626.8	128081	35893.3	18019.1	25017.6	166904	182124	190403	191727	143696	222205	24844.5	38364.3	230719	31186.8	31731.8	17298.6	25984.7	215434	96419	190861	250150	212695		160443	119528	34287.7
P08294	P08294	SODE_HUMAN	SOD3	Extracellular superoxide dismutase [Cu-Zn]	14279.8	10236.4	8156.08	8700.7	13183.3	12492.5	19917.7	8261.57	10673.4	41325	12703.6	12588.3	13214.9	9765.64	13849.2	35993.7	16582.6	11008.1	15000.8	8085.78	12195.9	14408.6	10986.9	18400.9	19757.5	11570.1	17748.6	14066.2	12412.8	13063.7	13649.7	16358.1	13299.5	12890.8	13350.1	11286.9	9830.19	19500.3	13514.3	13107.1	25123.4	15686.4	13400.1	6575.21	12620.9
P08311	P08311	CATG_HUMAN	CTSG	Cathepsin G														6183.94	7561.88		12486.5	10733.8				12555.6						8673.36			7100.3	15826.8		28017.6					12804	17965.6		24182.8		13406.4	18704.1
P08397	P08397	HEM3_HUMAN	HMBS	Porphobilinogen deaminase	9809.68	9786.51	9616.28	11395.5		6388.75	6522.23	8235.81	11149.5	12508.3	6965.79	10738.4	6348.35	4534.79	6217.68	13725.8		9230.14	11072.9	10888.5	7468.22	13328.8	8623.21	6508.37	7655.86	8340.97	5236.19	7065.77	5785.75	9970.62	12854.5	6395.34	12075.4	9295.99	11106.6	9228.27	4649.55	6975.75	5709.65	5180.14		10323.6	4361.42	14295.7	11610.7
P08473	P08473	NEP_HUMAN	MME	Neprilysin					15564	17575.3	20247.6						19837.3	24546.2	16264.2		16215							19398.2	22912	22386	15727.6	16894.3	18907.9								20055		26833.7	16052.9	26497.8	23513.1	23325.5
P08493	P08493	MGP_HUMAN	MGP	Matrix Gla protein
P08519	P08519	APOA_HUMAN	LPA	Apolipoprotein(a)
P08559	P08559;P29803	ODPA_HUMAN	PDHA1	Pyruvate dehydrogenase E1 component subunit alpha, somatic form, mitochondrial	170461	135679	146650	152728	258424	266211	250204	151848	167345	247796	185807	143541	257924	242650	258745	501470	215425	164294	175783	220453	173252	138794	127005	297138	231547	221698	243683	254922	242396	146579	192716	240521	171016	140919	165247	149872	286944	397573	250679	254140	281429	303820	245988	250946	136434
P08571	P08571	CD14_HUMAN	CD14	Monocyte differentiation antigen CD14	15397.6	4975.88	9312.38	8744.14	4653.09	8362.79	12436.9	5089.3	11150.8	9287.97		6528.52	8708.02	9057.24	6992.96	13501.2	8422.47	6264.64	6291.64	5255.04	4643.87	5162.57	5451	8590.73	4999.36	6610.6	5853.05	6301.18	5570.24	15435.4	14634.5	9109.04	13761.8	8888.93	3768.49	8581.52	14930.3	20565	8813.84	10734.2	14872.9	12082.1	6451.15	6376.4	8185.86
P08572	P08572	CO4A2_HUMAN	COL4A2	Collagen alpha-2(IV) chain	128182	155559	128334	83263.4	131430	128236	116411	101911	116196	63198.7	71147.2	97779.9	129425	112862	142332	34587.4	184407	98415.9	124369	93542.1	92121.9	175457	81166.5	155830	148009	104378	144350	112307	139890	114776	126540	140336	104844	87002.4	88757.2	94428.9	169486	150016	113587	118604	125655	196573	98810	162601	97878.8
P08574	P08574	CY1_HUMAN	CYC1	Cytochrome c1, heme protein, mitochondrial	92175.3	86970.8	86553.6	83206.9	141929	186234	169178	102009	95082.3	84489	118285	95067.9	157748	178064	253591	220055	133464	82535.4	93669.8	137863	112787	84907.8	96824.9	209835	148848	167227	231343	212196	190854	99365.4	91999.9	184355	116307	109958	117567	115734	187491	190722	231694	205363	220243	128881	228720	182801	111657
P08575	P08575	PTPRC_HUMAN	PTPRC	Receptor-type tyrosine-protein phosphatase C	12748.8	16675.1	22224.1	12667.5	11286.5	9568.89		16351	13010.7		15607.5	9015.41	13468.4	9272.75	9821.03		10129.6	15241.4	13519.5	11153.6	11984	12256.3	11072.8		7265.45	11918.1			6464.94	16329.4	14912.8	10636.1	17536.8	14036.5	10822.1	15295	12964.6	12911.2	9047.9	11082.4	12196.8		6053.3	11100.1	13256
P08579	P08579	RU2B_HUMAN	SNRPB2	U2 small nuclear ribonucleoprotein B''								4552.96									2335.46								2944.45				2538.81	2450.98		2800.32	3659.84					4262.33	2169.26	2196.38				2655.51
P08603	P08603	CFAH_HUMAN	CFH	Complement factor H	11068	4957.51	9990.2	5585.8	4450.49	6203.62	6059.12	9998.44	9083.47	16734.9	5634.36	6552.06	4605.02	5526.11	6890.06		7290.71	4379.24		7790.8	4069.5	5144.19	5992.88	4901.7	3558.75	4230.76	3569.37	5224.8	8000.91	6598.15	7993.93	7636.3	8346.47	5006.53		4189.7	4769.34	9775.76	6460.52	6499	4874.48	13666	5692.75	10281	6818.55
P08621	P08621	RU17_HUMAN	SNRNP70	U1 small nuclear ribonucleoprotein 70 kDa	23674.3	23789.4	30096.3	23727.7	16204.8	16437	13264	20036.7	25312.5	33680.1	22646.8	19637.4	13407.4	8938.02	24057.6	34058.5	9334.61	19701.2	17314.7	18119.2	15326.8	25859.5	17319.1	11053.8	11458.3	12773.8	11688.7	14308.4	10436.4	18829	25798.8	14254.8	26786.2	19399.9	16024.5	16628.8	12859.6	35676.6	10591.6	11907	13855.4	12967.6	13427.2	13397.9	14352.6
P08631	P08631;P07948	HCK_HUMAN	HCK	Tyrosine-protein kinase HCK																																		7355.84							11623
P08651	Q12857;Q14938;O00712;P08651	NFIC_HUMAN	NFIC	Nuclear factor 1 C-type	19140.7	14887.1		15907.5				11571.3	16376.7		8440.62							8732.02	10834.6	17736.1	15136	16548.7	24751		9350.1	11131.6				16173.8	16055.8	15049.5	23077.8		15023.1	17677.9	12080.5	18335.1	10363.8	8279.63	10417.1		10859.4	18644.5
P08670	P08670	VIME_HUMAN	VIM	Vimentin	578101	903912	1045570	374542	656172	257932	240174	605401	441063	376256	359042	435590	419980	193213	226218	441488	416912	600298	743770	307298	332633	946264	436210	399864	377237	339884	230951	216755	288245	812241	661710	270083	454504	438809	614516	516261	391519	469132	298308	208402	220900	298247	209902	409842	773014
P08708	P08708	RS17_HUMAN	RPS17	Small ribosomal subunit protein eS17	18014.6	7811.15	15034.8	12682.1		19278.4	19599.1	22810.9	14115.1	25892.9		18893.6	19812.5	10735.8	19986.2	51285.9	9010.03			7543.77			5964.98	14075.4	9040.05		11325.4	11803.6	11711	11068.6	19257.4	11741.3	11053.2	7229.09	9871.76	9296.41	13098.3	58556.5	11936.9	13251.9	14000.2	15030.4	14802.4	14685	10409.2
P08709	P08709	FA7_HUMAN	F7	Coagulation factor VII
P08729	P08729;Q14CN4	K2C7_HUMAN	KRT7	Keratin, type II cytoskeletal 7	26948.7	33032.1				9665.04				24946			17807.4				10362					15539.2	19020.1	11002.7		17146.7	9786.37			39587.1		23511.2	33530.9		43465.8	20331.9		48680.5	15251.4	18038.3	7764.19				47280.9
P08754	P08754	GNAI3_HUMAN	GNAI3	Guanine nucleotide-binding protein G(i) subunit alpha-3	74641.3	84334.2	59323.4	101649	86643.6	52393.7	50154.5	71034.2	72688.3	55850.3	81334.2	68868	75173.6	62354.9	49076.7	25110.4	56036.5	67415.8	83248.4	74204.6	105727	98711.5	109699	45851.2	54989.7	63858	57882.8	53657.5	57201.7	70939.1	56234.4	79489.4	64527.2	69089.8	80623	77258.1	61937.4	53769.1	56036	47478.5	55968.7	33735.6	55202.9	64069.6	75744.6
P08758	P08758	ANXA5_HUMAN	ANXA5	Annexin A5	1581380	1513170	1818480	1620970	830602	940239	1046610	1727780	1610110	1912370	1709490	1597450	1506260	1025030	963888	1299420	924393	1411550	1347690	1611960	1326010	986252	1696320	810055	720175	1237220	553935	515499	938135	1229030	1481320	1269620	1296700	1275030	1245440	1463200	858717	1417800	847088	752720	906286	1088130	748123	1312910	1869980
P08779	P08779	K1C16_HUMAN	KRT16	Keratin, type I cytoskeletal 16	51025.5	338290	167992	70188.7	22457	62894.7	127816	197802	22643.2	316649	216876	220164	34852	46755.2	15064.4	70646.7	12835.9	202519	88629.2	168016	26024.5	37648.2	18328.8	22044.1	9547.68	93952.3	7922.19	36920.3	7127.16	129905	270108	13967.4	48062	30735.8	50265.9	20684.6	815889	114009	21003.8	53382.3	82911.7	143287	67470.1	180978	131942
P08842	P08842	STS_HUMAN	STS	Steryl-sulfatase	9401.43	10912.5	11751.8	14273.1	20996.7	14586.7	7489.26		9264.48		12775.5	9040.67	14266.4	17271.2	18885.8		13967.7	9747.63	14534	20229.8	5037.09	11719.7	9308.31	14781.6	18947.1	17909.7	11699.4	22852.7	18797.6	13073.4	14117.7	17793.1	13709.9	13122.7		10672.2	22671.9	14552.8	20502.9	18150.7	22962.2		19686.4	23752.7	14093.6
P08865	P08865;A0A8I5KQE6	RSSA_HUMAN	RPSA	Small ribosomal subunit protein uS2	96677.3	83934.9	77119.3	90518.4	122075	114164	130054	97915.7	99545.8	117171	70761.1	90151.6	117009	118907	130184	193653	83139	91924.6	88343.3	111590	109747	105005	88454.2	135814	119343	125493	116505	132770	127253	93664.8	114750	116520	106825	86904.9	102437	100334	127227	175352	126702	132022	122980	222213	130045	110609	94997.5
P08913	P08913	ADA2A_HUMAN	ADRA2A	Alpha-2A adrenergic receptor
P08962	P08962	CD63_HUMAN	CD63	CD63 antigen	6521.03	4703.34			4055.36	5111.96	8979.31		6332.03	6373.49		8281.2	6318.66		7786.85							6155.92		7246.62		5354.65	8417.98	7129.16				5983.93							6137.27	9822.55	6501.27		12664.5	7013.88	6352.96
P09001	P09001	RM03_HUMAN	MRPL3	Large ribosomal subunit protein uL3m
P09012	P09012	SNRPA_HUMAN	SNRPA	U1 small nuclear ribonucleoprotein A	11619.2			9013.6	10061.1	4917.82	12335.9	13908.7		21969.6	11135.6		10581.4	7589.87	9185.14		7022.57	10171.4	10754.9		16814.3		14268	6806.14	7477.16	7275.24		6674.23	7263.48	8172.29	8615.27	7783.04	9708.75	8187.94	8388.4	8476.55	9059.95	10134.7	6911.53	9741.34			7026.03	11266.4
P09038	P09038	FGF2_HUMAN	FGF2	Fibroblast growth factor 2	15255.4	13892.2	10978		12539.3	9316.57	9764.77	9555.64				12808.6	17729.8	17098.4	8660.32		14136.5				13405.8	13205.6	13427.4	9291.73	11859.4	12062.9	8539.69	7184.29	7409.52	14440.8	12970.5	14216.6	10937.3	8088.68	10189.6		11667.4	14608.2	10371	9802.95	11352.1		6188.21	17767.8	14295.6
P09104	P09104	ENOG_HUMAN	ENO2	Gamma-enolase	1515560	1522100	1653560	1520660	1476950	1639870	1604740	1888790	1753880	1746380	1803310	1710470	1841290	1752720	1644510	2111250	2177970	1840970	1377450	1263390	1519340	1278100	1355960	1709430	1517740	1273170	1557060	1305610	1498200	1887180	2061700	928868	1619130	1305370	1304450	1619030	1665060	1598650	1398780	1464670	980966	1010740	1614170	1592130	1600260
P09110	P09110	THIK_HUMAN	ACAA1	3-ketoacyl-CoA thiolase, peroxisomal	64276.3	65725.6	83322.5	69407.1	74485.9	97915.5	78895.8	73922.3	67267.4	101242	70724.1	64733.9	93881.8	95176.7	87337.1	99045.1	98735.1	95776.4	81929.6	78426	80114	74506.7	79701.3	73636.8	107678	99050.5	96039.4	92643.9	104377	75221.3	66342.3	69841.8	76629.1	85898.3	68830	74292.8	104498	80985	82847	92757.1	85982.4	89306.7	92639	101708	68834.1
P09211	P09211	GSTP1_HUMAN	GSTP1	Glutathione S-transferase P	156750	192083	231550	180500	141486	159295	123128	194245	158217	109379	202538	157800	158424	148447	190916	149155	176626	207349	167317	198420	156010	162572	160595	101927	168264	157352	105579	143696	135905	195255	161150	141129	175621	167592	166029	184058	147011	120301	127524	126069	148026	91766.5	147428	170273	197489
P09228	P09228	CYTT_HUMAN	CST2	Cystatin-SA																									10860.2												47887.4
P09382	P09382	LEG1_HUMAN	LGALS1	Galectin-1	586591	612627	714834	761953	248243	219295	206377	698266	721910	654236	599466	815834	280434	222937	249306	454924	230783	310674	730341	491598	596604	462835	702357	167673	230775	275566	199590	148680	180338	620637	912158	220033	514701	735441	499003	877488	238235	590304	166706	213773	267701	225213	222506	545325	746027
P09417	P09417	DHPR_HUMAN	QDPR	Dihydropteridine reductase	451603	382659	365055	358155	271250	392454	471716	344692	406088	686708	625024	536014	329963	391834	454228	597659	360447	898612	348803	461421	454013	350082	329982	507137	383029	401769	358147	402830	366348	314117	743376	483593	531939	497499	503337	298260	307521	575103	403026	445646	442180	584870	404118	635942	449521
P09429	P09429;P26583	HMGB1_HUMAN	HMGB1	High mobility group protein B1	52419.3	33603.3	35652.8	40624.2	18976.4	24355.3	30747.6	33198.4	46375.9	49210.7	44719.8	47039.1	21042.6	15593.3	26095.3	50523	22419.8	24638.6	22650.3	24720.4	33856.8	28399.4	31360.7	16170.1	13982.3	9616.51	17781.8	17843.9	12129.4	30281.5	61504.5	22404.5	38781.2	29151.9	35328.1	31677.5	13836.8	49070.3	16452.7	19258.6	22556.6	29509.5	17614.8	24312.3	26864.3
P09455	P09455	RET1_HUMAN	RBP1	Retinol-binding protein 1	74703.1	88354	69623.2	106570	87054.6	88390.1	101427	75290.4	103478	157457	126383	81023.2	90814.4	92798.2	77352	247580	81604.1	97518	87040.2	80774.9	91990.3	83177.1	77721.3	74233.4	102548	91552.1	84149.7	80594.2	95731.3	76906.5	87190.1	83482.4	91784.1	93917.9	117815	71169.8	61846.9	67675.9	76616.9	70017.5	77816.9	64580.8	70619.7	73812	87079.8
P09467	P09467	F16P1_HUMAN	FBP1	Fructose-1,6-bisphosphatase 1																	4069.01																2803.11
P09471	P09471	GNAO_HUMAN	GNAO1	Guanine nucleotide-binding protein G(o) subunit alpha	1344180	1134360	1215870	1336140	1800740	3154050	2681610	1293570	1582370	2300660	1602690	1777680	2968590	2668280	2400760	5613950	2914760	1602170	1375930	1498540	1519220	1172950	1550340	2423170	2000570	2437300	3010750	2422170	2070960	1431320	1899430	2335310	1773510	1620800	1437010	1905690	3072280	1849130	2821470	3006990	3225700	2555820	3818120	1792260	1433320
P09486	P09486	SPRC_HUMAN	SPARC	SPARC	44481.9	52260.6	37702.3	37352.8	53234	31666	76615.4	44890.1	37163.2	91374.9	38201.5	42945.5	64155.1	45171.3	53256.9	252149	70123.7	37150	40509.8	51288.7	35697.1	37076.8	29567.4	41051.4	57464	56170.7	50885.2	47704.2	75136.8	36935.8	41494.3	70014.8	35663.7	36915.8	53086.5	42919.6	41310.1	44383.4	41926.4	47312.5	71360.4	108145	39526.2	39685.9	55395.9
P09488	P09488	GSTM1_HUMAN	GSTM1	Glutathione S-transferase Mu 1
P09493	P09493	TPM1_HUMAN	TPM1	Tropomyosin alpha-1 chain	195189	217831	206351	234181	243375	223937	228156	230760	236669	190341	215689	231157	286993	243289	267523	600090	288882	234286	249399	284641	238085	276800	217196	241680	228611	306038	225046	220159	249064	243750	249082	238713	232980	234527	210674	257472	300340	198265	244422	256783	323858	434946	271919	246236	234212
P09496	P09496	CLCA_HUMAN	CLTA	Clathrin light chain A	130563	141092	108191	97865	180481	160038	94598.3	152507	118868	211986	197947	83874.3	173789	174659	173472	271627	192801	201710	179343	162225	194699	134983	203713	138630	196188	127976	162857	173109	207829	200178	165432	219863	156067	169123	132170	214523	217432	116426	200556	189210	170668	90873.4	214155	149770	159911
P09497	P09497	CLCB_HUMAN	CLTB	Clathrin light chain B	110506	118740	94540.5	100775	158684	158951	115005	115965	95934.9	82246.6	167927	78797.1	153297	180350	181687	318473	204665	156279	145372	135956	161372	85013.3	143768	142691	164203	131822	191894	161305	201000	117025	100898	209897	141796	133384	126273	141149	191129	101873	186899	183810	164413	102610	167241	128301	134404
P09525	P09525	ANXA4_HUMAN	ANXA4	Annexin A4	57452.6	46428.6	49437.4	48442.5	31056.5	27328.3	23024.4	58036.3	52612.4	40674.3	40316.4	49767.6	36552.2	23553.4	29087.7	33530.9	32585.7	54621.4	54699.4	35554.8	41661.7	51250.3	52798.5	29528.3	33781.3	30809.4	23372	22413.7	27035.4	42983.7	46267.5	29315.8	50062.4	52654.7	58479.4	45500.2	25361.8	33793.4	20802.9	27248.6	32571.9	25377.1	29819.8	59567.8	58277.4
P09543	P09543	CN37_HUMAN	CNP	2',3'-cyclic-nucleotide 3'-phosphodiesterase	4988500	3897910	3709430	4977650	1333030	1265830	1877530	4576230	5829960	5540840	6220150	5952270	1289210	1666610	1366850	4423610	1139580	5874180	3646650	2835590	5056240	3895920	5238960	1698780	1371870	1283220	1027200	1011350	1145520	5809580	6944740	1943790	6044140	5518900	6078150	6716630	1513390	4141580	1289730	1358810	1137320	1673870	1743700	3605950	5495300
P09601	P09601	HMOX1_HUMAN	HMOX1	Heme oxygenase 1
P09619	P09619	PGFRB_HUMAN	PDGFRB	Platelet-derived growth factor receptor beta						5323.61	6892.82	4921.31		11016.3			4729.43	3888.73	5612.98	10564.5			6454.54					5076.99	5548.27	6287.8		8859.96	6202.38			7786.32		5360.64					5225.7	5522.59	4030.75	10101.5	4013.35	9692.29	8257.84
P09622	P09622	DLDH_HUMAN	DLD	Dihydrolipoyl dehydrogenase, mitochondrial	151114	144328	126625	129644	251495	272919	239098	150382	154256	269423	197690	103639	257043	261851	268630	651694	237367	170093	163258	253049	175641	144510	149569	265314	251341	227986	262932	243002	235483	176962	222808	266391	170445	149671	139331	192218	316592	399472	253393	287491	305913	340687	289664	276884	144624
P09651	P09651	ROA1_HUMAN	HNRNPA1	Heterogeneous nuclear ribonucleoprotein A1	137932	114834	110164	112480	89731	121107	118125	145539	97377	137235	146125	113323	126659	114810	119796	166574	94775.7	116847	116740	133446	142373	103972	109024	139044	81222.4	103785	96192.2	114635	102961	108541	135273	152220	141754	128153	126933	137554	108672	191716	132762	141429	106233	109217	120626	120978	105904
P09661	P09661	RU2A_HUMAN	SNRPA1	U2 small nuclear ribonucleoprotein A'	11742.7	11111.4	11825.6	9893.18		7976.99		22449		11617.7	10916.7	12917.5	9406.35	16847	13176	8937.45	16257.7	10358.2	12245.5	10242.9	11097.1	11216.9	11322	8613.27	13236.3	10473.8	12250	7785.14	9241.36	10727.6		12488.8	11674.4	8309.83	13487.8	9590.33		15918.4	11595.6	7762.76	8321.57	15370.3	11876.1	15797.6	7473.68
P09668	P09668	CATH_HUMAN	CTSH	Pro-cathepsin H
P09669	P09669	COX6C_HUMAN	COX6C	Cytochrome c oxidase subunit 6C	83974.3	65911.7	70490.2	88164.2	113221	115037	134169	49579	78674.4	143463	73236.9	96175.8	136915	77556.1	83934.3	212344	81694.8	62915.2	70406	99752.2	69939.9	58369.4	82848.5	115860	77557.2	72867.9	103332	96582.1	99360.9	78002.7	88181.5	107238	83017.1	66438.6	61548.9	69154.7	130556	151582	114099	117601	118635	104532	114801	134217	58629.5
P09871	P09871	C1S_HUMAN	C1S	Complement C1s subcomponent	4432.27													6222.1			6246.85								5038.7	4454.43		3567.32	5769.57		5962.64	4875.78	4042.77				4614.88		5052.84	4695.7	4990.98		4071.14	7492.46	4344.76
P09874	P09874	PARP1_HUMAN	PARP1	Poly [ADP-ribose] polymerase 1	69703	65191	65095.5	69274.7	36059.5	33051.5	36807.1	70269.5	60692.5	78880	66688.4	57618.8	36218.1	40330.3	36911.5	83050.2	35845.4	67881.6	62229	54781.8	61540	64553.1	53048.6	31715.5	33894.5	34627.6	28914.1	29550.9	28742.6	64493.1	63545.8	37513.7	75352	63973.2	62353.7	66927.2	29086.4	48281.8	29408.9	34634.5	34980.8	39799	29061.7	51328.2	59665.2
P09914	P09914	IFIT1_HUMAN	IFIT1	Interferon-induced protein with tetratricopeptide repeats 1			7641.34	7305.76	7168.46	5986.19	6406.24	7269.47	10081.4	15306.3		9456.68	7392.32	6632.97	5587.6	15505.8	6548.03		5675.45	8864.55		5709.03		8313.17	5487.59	6165.04	4705	5372.92	6255.92		7751.43	7056.76	7249.22	7362.58	8056.4	5436.06	7182.65	6649.53	4878.46	6155.57			4314.5	8583.71	11997.5
P09917	P09917	LOX5_HUMAN	ALOX5	Polyunsaturated fatty acid 5-lipoxygenase							5253.22	4506.94					4456.65																	7793.77		4110.95	7657.29	5656.87		4771.9					4670.49
P09936	P09936	UCHL1_HUMAN	UCHL1	Ubiquitin carboxyl-terminal hydrolase isozyme L1	1459350	1570800	1491270	1439930	1022090	1532300	1763890	1120660	1532080	2674220	959245	1971130	1276720	1047980	1550530	3416490	1363180	1049220	1120060	1141170	813342	1085850	752061	1418150	917790	840160	1127190	888524	954792	1631310	1651530	1075690	1082210	1764900	1107360	1462820	1250320	1113480	1141320	1244180	1109890	999414	1226830	1219490	1485710
P09960	P09960	LKHA4_HUMAN	LTA4H	Leukotriene A-4 hydrolase	42756.7	42989.7	41784.7	36230.8	49041.2	45128.9	46628.6	43631.6	45378.7	70570.6	45682.2	42577.1	49307.3	44272.8	48288.3	51061.4	55883.8	42041	36335.5	38835.6	44528.2	34725.6	39225.6	40946.6	43241.7	41682.3	51786.6	41171.6	44583.8	37714.5	36659.4	40974.6	48202.5	38395.2	45263.2	42453.4	42125	32785.3	45135.7	44780.3	50380.4	48313.2	41978.5	40713.7	43587.5
P09972	P09972	ALDOC_HUMAN	ALDOC	Fructose-bisphosphate aldolase C	891019	851080	801026	909455	863361	683344	805429	1009580	939235	1278480	828791	1193410	886661	706789	657286	2529990	803777	992995	788434	1240980	744281	761963	889311	936557	681910	587082	648424	564416	716537	908948	1151990	832988	743138	725829	616543	884028	780048	1405940	490371	627605	698758	672263	600290	1432860	758008
P0C0L4	P0C0L4;P0C0L5	CO4A_HUMAN	C4A	Complement C4-A	79847.8	36081.6	61506.9	21489.5	32454.8	47425.3	30332.2	47509.9	58264.4	34374.4	55053.4	33143	55386.2	40955.6	21874.8	72543.9	32069.7	26836.1	37543.8	61744.5	36153.8	35275.6	34897.1	34571.7	36378.7	45921.4	31137.9	36144.5	37672	41757.2	66796.9	64293.7	52010.2	28672	25482.9	32635.6	35482.6	67869.4	55708.3	40937.7	40183.6	57460.2	35854.2	61161.7	43951.2
P0C0L5	P0C0L5	CO4B_HUMAN	C4B_2	Complement C4-B							3242.05		7964.99					6704.32			8208.43		4530.02			6557.22	5090.34	4609.54	3911.46				4808.64	4100.49		6202.86					4312.38	4299.67	5945.32			10427.5		6527.41
P0C0S5;Q71UI9	P0C0S5;Q71UI9	H2AV_HUMAN;H2AZ_HUMAN	H2AZ1;H2AZ2	Histone H2A.Z	120857	50055.3	44073.3	63545.6	62948.1	40118.5	79274.8	85459.1	120924	262254	133377	90672.2	67443.7	60391.1	71405.8	623505	76765.1	76228.1	95617.3	63223.5	101328	57007	85544.2	41402.5	60343.8	56511.2	34302.6	30179.8	50535.6	64261	85832.1	81411	97740.9	59716.1	77499.8	70689.2	50003.6	137490	51686.8	56761.6	49487.5	87249	46757.1	62965.5	66134.4
P0C0S8;P20671;Q16777;Q6FI13;Q96KK5;Q99878;Q9BTM1	P04908;P0C0S8;Q6FI13;P20671;Q9BTM1;Q99878;Q7L7L0;Q93077;Q16777;Q96KK5	H2A1D_HUMAN;H2A1H_HUMAN;H2A1J_HUMAN;H2A1_HUMAN;H2A2A_HUMAN;H2A2C_HUMAN;H2AJ_HUMAN	H2AC12;H2AC14;H2AC17;H2AC19;H2AC20;H2AC7;H2AJ	Histone H2A type 1	2228100	2130450	2190050	1744690	2469110	1583080	1811300	2543270	1747920	2395620	2812920	2603180	1854770	1204270	1611980	3273020	1504060	2180590	1779500	1621030	1866340	1574280	2142060	1586360	1414350	1172260	922467	1031970	1242640	2349580	3081320	1871990	2105080	1907650	1608070	2471150	1440940	3138560	1285620	1179620	1282430	1379200	1462040	2384830	1552900
P0C2W1	P0C2W1	FBSP1_HUMAN	FBXO45	F-box/SPRY domain-containing protein 1
P0C6S8	P0C6S8	LIGO3_HUMAN	LINGO3	Leucine-rich repeat and immunoglobulin-like domain-containing nogo receptor-interacting protein 3					10178.7	10120.4	7802.2						9610.96	13586.6	9212.15		10381.8							7175.23	12940.5	11157.7	20220	20934.8	12323.7								11082.9		21751.4	14307.3	8956.24	18220.1	17778.3
P0C7M8	P0C7M8	CLC2L_HUMAN	CLEC2L	C-type lectin domain family 2 member L	21618	26985.1	19125.5	17799.8	16164.8	6616.86	15367	50582.1	14759.3	72099.6	70414.7	17354	13826.8	32429.5	8087.7	46142.1	20248.5	47998.9	62310.3	18426.5	93308.5	28452	93797.6	7527.96	20818	16970.4	6188.03	4526.03	15384	31580.7	21565.3	17858.5	26894.6	25956.7	18826.6	38453.1	15132.3	13710.7	12053.8	10301.5	8904.42	23925.1	7570.11	32366.8	36309.8
P0C870	P0C870	JMJD7_HUMAN	JMJD7	Bifunctional peptidase and (3S)-lysyl hydroxylase JMJD7	11334.1	16816.4	14784.9	11302.9	10760.9	9375.61	8745.35	10290.2	19684.1	20242.4	13037.6	9804.84	6488.73	8769.29	9151.56	23152.2	6207.25	10463.6	13746.2	10490	9504.76	13171.1	13561.5	8200.92	9841.15	8859.49	9142.68	8517.67	8495.44	11906.1	9410.81	8024.07	11827.5	9743.85	13021.8	8376.55	9163.26	8858.15	5408.28	8359.09	6205.9	13408.8	3841.27	8862.49	11597.9
P0CG29;P0CG30	P0CG29;P0CG30	GST2_HUMAN;GSTT2_HUMAN	GSTT2;GSTT2B	Glutathione S-transferase theta-2		14264.2	10554	48784.5	10726	9901.51	43211.5	12143.6	9118.14	16301.9		37540.5	9652.79	7045.49		23886.3	25877.1	28919.9	41995.5		16370.9			18779.4	45020.1		12084.2		11552.3		60178.7	34722.3		31825.8		43774.9	9641.37	44655.7	23417.1		25155.8		28381.3	41226.4	36062.3
P0CG47;P0CG48	P0CG47;P0CG48	UBB_HUMAN;UBC_HUMAN	UBB;UBC	Polyubiquitin-B
P0DI81;P0DI82	P0DI82;P0DI81	TPC2A_HUMAN;TPC2B_HUMAN	TRAPPC2;TRAPPC2B	Trafficking protein particle complex subunit 2	17285.3	15987.4	12980.6	12889.1		19006.1	14560.3	9455.52	16145.6	13070.9	10065	11374.5	12535.9	13513.5	17696.4		13843.1	13269	8850.71	9040.52				18060.5	15467.1	12502.8	18962.3	18463.4	19774.2	14246.9	12747	12950.4	12743.2	13201			13768	14769.1	13873	14400.1	14090.5	13803.4	5958.7	10472	11840.6
P0DJ07	P0DJ07	PT100_HUMAN	PET100	Protein PET100 homolog, mitochondrial
P0DJ93	P0DJ93	SIM13_HUMAN	SMIM13	Small integral membrane protein 13		7243.36	7389.29		9614.67	6518.82			5151.77					6066.44	6494.56		4331.29	8535.29			8778.64	7971.04	7918.23				7170.39	7958.22	7166.25			5025.57				9160.41			6494.45				5164.63		6815.93
P0DJI8	P0DJI8	SAA1_HUMAN	SAA1	Serum amyloid A-1 protein
P0DJI9	P0DJI8;P0DJI9	SAA2_HUMAN	SAA2	Serum amyloid A-2 protein	7347.15			11960		9071.1	6631.84	12358.7	50749.5					35140.6	7570.96		6748.28													9585.96		14522.8	11194.1	7199.31			9249.39		15003.8	10457.3	6562.95	29591		21294.3	17142.5
P0DMV8;P0DMV9	P0DMV9;P0DMV8;P34931	HS71A_HUMAN;HS71B_HUMAN	HSPA1A;HSPA1B	Heat shock 70 kDa protein 1A	566476	321040	689446	474518	387805	598374	532632	357702	424746	616014	490749	536782	495334	368410	458859	959806	503568	416194	384929	568310	365811	392042	420299	397720	386024	433901	435430	361690	408800	457199	467700	494958	404512	480024	415505	504583	382900	461463	409082	390233	437268	398718	473255	349380	440095
P0DMW4;P0DMW5;Q96HG1	P0DMW5;Q96HG1;P0DMW4	SIL2A_HUMAN;SIL2B_HUMAN;SIM10_HUMAN	SMIM10;SMIM10L2A;SMIM10L2B	Small integral membrane protein 10-like protein 2A
P0DOY2	P0CF74;P0DOY2;B9A064;A0M8Q6;P0CG04	IGLC2_HUMAN	IGLC2	Immunoglobulin lambda constant 2	83580.1	33548.1	65301.1	60913.3	35338.5	44452.2	92176.8	74760.5	70281.8	23959.6	22892.2	53500.3	46535.2	54573.2	35206.8	13530.2	64529.6	502707	41676.9	42236.6	19929.3	50465.3	48890	1061010	66940.1	28582.4	25770.3	56969.2	53480.4	39383.5	87463.3	92017.3	84713.6	80482.4	21036.3	70363.3	41407.8	125014	118446	74389.3	120068	89136.7	115387	90551.6	107214
P0DP23;P0DP24;P0DP25	P0DP24;P0DP25;P0DP23	CALM1_HUMAN;CALM2_HUMAN;CALM3_HUMAN	CALM1;CALM2;CALM3	Calmodulin-1	924679	1030630	1043330	1151100	1200400	1230610	1138970	1283490	1252590	2013960	1109190	1106360	1525060	1830390	1291300	2210170	2030190	1401520	1272610	1037140	1372740	955136	1336770	1442180	1534890	1523040	1371400	1254850	1511140	1281980	1378160	978907	1174010	1219380	992089	1254190	1444430	1099600	1572650	1371780	1470810	1407210	1465230	1197030	1070700
P0DTE7;P0DTE8;P0DUB6	P0DTE7;P0DUB6;P19961;P0DTE8;P04746	AMY1A_HUMAN;AMY1B_HUMAN;AMY1C_HUMAN	AMY1A;AMY1B;AMY1C	Alpha-amylase 1B																									10298.6						6581.66						12726.1
P10114	P10114	RAP2A_HUMAN	RAP2A	Ras-related protein Rap-2a	90419.2	60617.1	57394.5	85502.4	57811.4	66551.5	75619.5	90674.8	85275.4	78208.8	84134.1	74075.4	121709	123659	70605	136201	105425	95556.5	83371.3	73149.1	105230	89092.8	112855	86613.7	102058	99077.8	102058	77533.7	68767.7	87707.1	87279.8	84818	86311.5	76195.5	83574.4	94144.1	104355	64693.6	122610	104990	112291	61660.1	109466	81999.5	87199.5
P10155	P10155	RO60_HUMAN	RO60	RNA-binding protein RO60	54152	37569.7	37275.2	40721.1	37046.4	25728.9	36955.7	41609.8	41632.6	71432.9	49005.1	46374.4	30493.3	23449.5	30385.2	103643	25516.1	42115.8	40394.1	40779.9	42635.7	38003.9	38255.3	31958.5	32565.9	25670.3	25774.7	25951.5	22423.4	44280.3	42961.6	27485	49998.6	36752.8	51681	38583.4	30112.7	34307.6	22939.2	28129.9	30297.3	54565.7	23487.9	39894.6	40692.9
P10253	P10253	LYAG_HUMAN	GAA	Lysosomal alpha-glucosidase	34311.2	45334.2	29197.1	30298.7	26318.8	34088.3	34460.6	40935.4	33423.1	37177.3	31458.4	30391.3	43630.2	29677.9	43513.3	51727	28711.2	47533.7	33257	50864.9	36307.8	36760.9	31565.4	50010	31350.7	45692.2	40386.2	48019.5	32272.7	35672.7	43690.4	24373.1	31849	37393.7	31906.5	29380.7	38676.6	42200.5	27981.9	34550	43621.5	42599.8	23384.6	34050.2	37109.7
P10301	P10301	RRAS_HUMAN	RRAS	Ras-related protein R-Ras	32923.5	34622.4	38323.4	28208.1	31103.4	32962.3	35969.4	31171.1	29047.3	23240.4	35892.7	29831.1	40907.2	30227.4	23721.7	29138.3	42536.5	32587.6	29026.2	30139	39502.6	42969.6	36917.9	32804.2	37259.8	33784.1	36827.9	33041.2	29779.5	30460.8	30798.5	35081.2	38000.4	29655.5	53195.1	33615.2	32819.7	34131.7	34980.1	38045.9	33625.4	51260.6	31788.5	27823.6	34442.6
P10321	P10321	HLAC_HUMAN	HLA-C	HLA class I histocompatibility antigen, C alpha chain								10479.8
P10398	P10398	ARAF_HUMAN	ARAF	Serine/threonine-protein kinase A-Raf							4304.55											6675.23		8413.58		8334.78		3325.58	4628.62						8178.12	5402.36	6991.2			6653.29								7766.29	7448.15
P10412	Q02539;P16402;P10412;P16401;P16403	H14_HUMAN	H1-4	Histone H1.4	782839	527557	686357	663332	354338	452593	656563	700506	789020	1565480	763808	1352290	636881	298786	522884	911983	470730	481639	501951	486829	403267	352481	359743	353191	238683	213775	208496	206718	184868	570916	1400340	445551	527598	519294	402285	717537	352979	1823850	262178	306618	324271	232880	473038	928299	387379
P10451	P10451	OSTP_HUMAN	SPP1	Osteopontin		10190.9				15990.4	7047.69		10941.2	7561.72	6470.99	9756.33		5870.82	11174.3		11782							5878.37										4048.05
P10515	P10515	ODP2_HUMAN	DLAT	Dihydrolipoyllysine-residue acetyltransferase component of pyruvate dehydrogenase complex, mitochondrial	55871.5	45674.8	56022.4	54987.6	84102.1	125517	111195	59863.3	62548	109723	110579	61844.9	99030.1	100015	124412	149042	105362	60417.7	73337.9	91888.7	92998	62234.5	91924.7	108252	129795	85801.8	102529	82894.1	113391	66018.7	81662.4	159741	73744.8	66908.2	58267.8	71205.8	142838	174291	136155	110139	123452	112534	121414	111120	60799.6
P10586	P10586	PTPRF_HUMAN	PTPRF	Receptor-type tyrosine-protein phosphatase F	14042.3	13803.1	12834.1	14088.8	17542.1	26003.7	20669.7	13988.7	13922.4	19061	13916.3	13969.1	25082.5	26472.5	22483	30463	26214.8	18077.4	19509.7	18146.8	15823	15358.7	12602.1	21839.2	29192.8	20196.8	29194.6	26424.1	26950.3	15774.1	18813.4	26360.2	15653.8	11993.3	16072.7	16246.6	28087.6	14242.2	32597.9	28518.4	21659.2	22832.9	26576.4	19088.1	16611.7
P10599	P10599	THIO_HUMAN	TXN	Thioredoxin	236947	170829	223685	196773	105997	201987	204934	266734	253805	131180	244369	276052	272693	173167	201710	43881.7	199661	207720	214313	215390	160800	133340	193605	169438	115662	181679	134574	185060	161786	302390	427019	154358	209083	267390	181388	320618	259777	353367	150059	167603	183021	135752	254141	204938	249960
P10606	P10606	COX5B_HUMAN	COX5B	Cytochrome c oxidase subunit 5B, mitochondrial	292256	280804	236617	204588	389629	403917	307138	268934	310074	569049	257268	246602	546836	445118	371807	1465350	386607	253867	215625	475165	272102	201952	199856	347387	246425	351620	305859	229478	325671	220173	421716	300769	256705	207587	148210	280237	435552	555377	318446	368067	376209	468037	451530	448469	213580
P10619	P10619	PPGB_HUMAN	CTSA	Lysosomal protective protein
P10620	P10620	MGST1_HUMAN	MGST1	Microsomal glutathione S-transferase 1	12957	10209.4		11304.5		11978.5	19599.7	7150.73	8347.69			10685.4	27651.3	18768	5209.65	33716.1	17464.4	6710.57	7607.98	16435.5	19215.2	12382.5	18456.9	17186.5	26001.8	16770.6	27991.1	23680.7	20953.8	12030.5	9896.37	23674.4	13909	8734.61	11366.6	19107.3	28518.7	20552.3	18553.1	25264.9	25068.7	42565.9	25776	25316.2	17146.4
P10636	P10636	TAU_HUMAN	MAPT	Microtubule-associated protein tau	359901	327129	350492	285214	319726	417065	368085	307207	273907	330387	292570	257007	291764	282196	379040	510117	357113	285841	197969	319087	196786	325303	172762	300780	253805	204569	415241	363953	296859	230330	236012	408678	234695	277519	207400	236464	213385	237476	274385	318282	170787	135966	304643	241006	193685
P10644	P10644	KAP0_HUMAN	PRKAR1A	cAMP-dependent protein kinase type I-alpha regulatory subunit	75072.4	76620.7	72227.5	70810.6	59407	56331.5	60758.6	95383.5	74910.5	88191.8	94239	60789.7	60130.9	51064.2	65421.9	96803.2	57688.2	88121.7	67804.5	72725.4	79971	70239.3	66565.7	55488.2	55806.5	59838	60320.7	53446.8	49992.3	85035.7	73645.1	80685	92138.2	78338.4	104571	71373.3	51490.5	77443.6	49415.2	56828.4	52948.1	62391.5	54938.5	67804.2	81382
P10645	P10645	CMGA_HUMAN	CHGA	Chromogranin-A	7700.48	8863.88		8014.74	9732.98	10369.5	11934	8574.96	8306.78		7236.25		10042.7	15195.4	12832.6	12180.4	24423.1	8046.93	8455.02	10139.1	7502.59	8346.41	9336.08	8969.27	14454.6	11168.6	11311	10028.7	18573.7	9144.99	12559.1	13446.2	9538.99	10366.7	6635.33	7128.86	11742.9	13750.2	10785.6	12221.3	13860.5		8192.89	10421.4	8670.85
P10721	P10721	KIT_HUMAN	KIT	Mast/stem cell growth factor receptor Kit							5185.89						3783.07		4740.83											3267.61		3928.9	4437.03														3711.8
P10746	P10746	HEM4_HUMAN	UROS	Uroporphyrinogen-III synthase			9301.14	10325.1	5525.13	5621.85					10884.6		5779.22	8210.54	6386.46			10123.2	10311.7	8828.6	11675.7		11297.8		7780.1	7536.24	6679.17	7884.35		11835.1	10538.2	9217.17	10768.5	8941.55	8289.12	12195.6	7809.96		9577.01	7202.15			8552.66	9100.24	12348.7
P10768	P10768	ESTD_HUMAN	ESD	S-formylglutathione hydrolase	117625	119720	95103.5	75021.3	77881.5	96620.4	89615.9	111705	117682	123709	115525	75014.1	97227.7	76348.1	90355.3	53339.3	98885.5	65103.7	81540.6	55449.2	106884	109449	60901.1	55734.5	95482.9	56958.1	86065.7	73532.3	63443.5	89526.8	87388.8	74203.5	117531	109550	137856	87576.1	61823.5	64409.7	73813.6	87057	95103.7	85716.5	72207	53156.3	101673
P10809	P10809	CH60_HUMAN	HSPD1	60 kDa heat shock protein, mitochondrial	251181	202231	261049	222594	340468	440080	379228	289020	245741	419752	299217	290156	517605	441095	381813	642089	492154	268753	273867	364876	258605	178449	268038	364246	342099	360010	349518	293823	439325	246313	415415	455272	267045	265452	238936	332695	456669	695052	392117	433991	483887	379978	511815	449712	262383
P10909	P10909	CLUS_HUMAN	CLU	Clusterin	138225	121871	131710	115266	163704	199188	177830	102416	114887	191190	125916	110042	159835	135921	137556	240423	187216	136450	108302	154268	116827	129749	125022	152332	136632	143674	134762	139197	162462	139281	115394	192068	97352.4	92826	109308	107038	179080	127882	193867	146823	153198	170172	153186	121403	92071.3
P10915	P10915	HPLN1_HUMAN	HAPLN1	Hyaluronan and proteoglycan link protein 1				6988.55	14807.9	14352.2	9422.83			30139			9492.65	12871.6	25379.1	24346	7831.04			18237.3				20352.5	9435.53	14526.8	17270.1	14757.9	18344.3		9492.62	12009.6	18281.4				28893.7	18753.4	13182.5	17536.6	12240.5	42918.2	16088.5	39245.8
P11021	P11021	BIP_HUMAN	HSPA5	Endoplasmic reticulum chaperone BiP	190059	157656	209553	168171	315016	340210	271406	164676	165919	170186	208438	176797	298330	269272	284093	398634	247659	197754	142637	226630	178494	122247	181440	314618	188596	286242	244525	212101	261686	160449	210067	251469	190014	158606	166746	197364	267613	359932	299876	277344	309224	290439	296609	203447	172753
P11047	P11047	LAMC1_HUMAN	LAMC1	Laminin subunit gamma-1	94217.5	87967.7	109664	80571.1	158701	92671	103870	95153.9	96708.4	109192	67324.6	99940	97723.5	76211.8	96553.4	78155	125419	98729.1	113748	93434.4	82608.1	118958	83507.8	132750	106492	107134	102080	90229.9	95464.5	90896.1	113162	128787	87840.2	81913.2	94955.2	99057.4	114374	98623.3	95744.5	94922.3	95521.6	130655	104989	139130	107140
P11055	P11055	MYH3_HUMAN	MYH3	Myosin-3
P11086	P11086	PNMT_HUMAN	PNMT	Phenylethanolamine N-methyltransferase
P11117	P11117	PPAL_HUMAN	ACP2	Lysosomal acid phosphatase	6458.18				10303	8501.58	10984.4	6466.58	7039.4		10335.5	12847.3	7831.75	8187.44	8160.46		6405.47	7108.03			9371.19	11816.4	9056.83	16364.4	11959.7	6558.65	11762	16975.8	11539.5		8658.02	7002		5304.7	6404.68	6741.41	7785.5	8407.84	7813.17	11527.4	9921.64	12026.6	10633.1		8901.39
P11137	P11137	MTAP2_HUMAN	MAP2	Microtubule-associated protein 2	81323	94525.9	74916.2	74979	450951	504425	338590	85870.4	62267.3	156233	84741.6	61578	284136	421012	603063	416180	275969	78603.1	67164.1	214026	59562.7	86106	60948.4	540018	280567	214206	518838	619909	561092	66311.4	76126	492091	67938.4	70668.8	70064.9	70222.1	218555	264772	414044	376639	252281	239148	384926	194927	60553.1
P11142	P11142;P54652	HSP7C_HUMAN	HSPA8	Heat shock cognate 71 kDa protein	1661260	1636460	1762380	1680660	1326580	1380720	1261640	1735990	1777310	1483750	1682170	1913330	1312450	1300950	1487410	2196920	1285070	1623230	1644330	1552290	1515070	1284830	1696990	1368620	1062710	1243720	1195890	1067830	1203340	1720740	1996120	1199570	1570680	1885070	1383330	1979670	1193030	1568040	1222940	1224430	1261740	1354440	1452060	1712870	1659780
P11166	P11166	GTR1_HUMAN	SLC2A1	Solute carrier family 2, facilitated glucose transporter member 1	118022	95479.3	102071	119846	239920	207700	206884	99881.7	113798	224404	85238	149973	162726	164535	162681	432806	120476	80492.7	88496.7	153899	61826	79724.6	89302	174869	144427	131618	171157	157695	173558	85033.3	101002	229741	106798	92380.1	103578	85866.2	162882	272726	182678	183274	175342	310269	139261	208708	116623
P11169	Q8TDB8;P11169	GTR3_HUMAN	SLC2A3	Solute carrier family 2, facilitated glucose transporter member 3	53961.6	90072.3	88449.7	83282.5	238520	277461	214129	83470.4	109252	201762	101727	67101.8	283781	413611	296608	309278	387984	123739	82376.6	116216	87948.9	59009.1	103769	231875	342665	287838	355106	295893	241363	97113.3	85399.2	203453	103490	84241.9	68629.1	93882.6	317151	109328	326381	316980	331775	208086	307794	144249	106079
P11171	P11171	EPB41_HUMAN	EPB41	Protein 4.1	20223.3	16020.1	20065.3	19443.9	20977.8	19156.1	16767	16613.2	16306.1	19588.1	19219.4	19374.4	19998.4	18012.9	21893.5	29107.5	20094.3	14738.4	20244.4	24219	26619.9	19786.6		22404.4	19437.5	23322.6	18919.6	21152.3	19862.9	17842.2	18488.9	17800.9	21200.5	19184.5	18567.1	20274.1	20404.7	17232.8	20786.4	21910.1	27113.4	19939.3	21408.6	25921.4	21164.8
P11172	P11172	UMPS_HUMAN	UMPS	Uridine 5'-monophosphate synthase	21479.6	17580.8	21096.4	18256.1	17613.4	14393.7	17906.2	22503.3	19872.4		22718	18742.3	19256.8	19221	18883	32142.7	18000.1	21468.7	19145.1	21595.9	20115.2	22584.8	24014	14227.3	20952.4	21273	16860.8	20227.9	19772.7	19647.7	21080	23304.4	20908.2	20306.3	22423.2	19222.5	22239.6	17633.5	17472.7	19556.1	20650.3	21828.2	18448.4	19452.5	22479.9
P11177	P11177	ODPB_HUMAN	PDHB	Pyruvate dehydrogenase E1 component subunit beta, mitochondrial	204283	179264	193956	202785	370981	353880	338260	229096	211398	257903	224909	172144	376572	361896	411851	480073	326358	239797	212191	366741	208751	233635	175448	396355	333621	345827	346127	353134	337392	212549	261422	339704	220480	214273	219667	237114	376739	500382	323844	334906	390848	164834	391022	395989	192324
P11182	P11182	ODB2_HUMAN	DBT	Lipoamide acyltransferase component of branched-chain alpha-keto acid dehydrogenase complex, mitochondrial	22658.7	15602.3	18114.1	15413.4	21443.2	35770.9	31503	18101	19232.3	32116.8	20122.4	17891.6	35729.7	28174	32357.4	90909	31058.3	20199.3	18039.4	23879.9	20003.6	16313	20505.5	31507	25410.9	25081.1	30796.2	27716.3	30505.6	17771.2	27662.5	31367.7	19503.1	19500.1	17285.9	20074.9	33526.7	44540.6	26393.2	33317.4	35976.5	34935.9	34017.3	29245.1	17345.4
P11215	P11215	ITAM_HUMAN	ITGAM	Integrin alpha-M	8320.17	9988.71	10869	10505.7	9514.32	8975.8	9270.84	10053.1	7790.15	9939.27	9813.38	11257.3	10667.6	8437.29	9793.69	18277.1	9623.6	13569.4	8104.85	7963.52	7108.55	13464	7108.88	8530.3	8818.43	7426.1	8232.19	8361.93	8242.46	10450	11562.6	12609	15370.4	10953.7	10911.6	10216.6	6866.6	9090.43	8953.58	9856.94	9116.38	5748	6486.34	9773.84	11678.8
P11216	P06737;P11217;P11216	PYGB_HUMAN	PYGB	Glycogen phosphorylase, brain form	444301	457658	444472	384799	293469	399280	453535	440173	461339	497747	380402	469374	492690	294510	445339	724657	471168	413205	425384	408899	403697	427047	329475	403957	449073	309790	418246	389439	334304	495761	466041	485359	442706	453707	464779	480593	419567	490810	291600	383164	463349	360592	405842	380453	435870
P11217	P11217	PYGM_HUMAN	PYGM	Glycogen phosphorylase, muscle form	102833	75438.9	78135.8	73198.2	141777	96646.6	138410	114288	66487.1	148130	108456	73146.7	199467	99020.7	113802	305579	94938.6	84468.6	48276.4	180941	82872.4	58896.8	62871.8	93219.7	79155.1	161116	68611.8	91143.5	85805	58821.8	98985.1	154691	81881.8	66586.3	138130	99647.1	96840.2	179944	84276.4	108944	183452	208813	96802.7	136603	72123.3
P11229	P11229	ACM1_HUMAN	CHRM1	Muscarinic acetylcholine receptor M1
P11233	P11234;P11233	RALA_HUMAN	RALA	Ras-related protein Ral-A	95276.3	121944	89973.7	115455	90926.1	86517.1	79776.2	132967	141515	146077	152126	102828	99579.9	130496	105599	357240	115247	184170	134611	118207	157025	116521	162315	76880.1	119032	102721	106763	87450.4	110452	132695	136500	109709	152399	146995	142017	158385	103236	100931	111660	98055.6	110369	116300	113852	145279	182217
P11234	P11234	RALB_HUMAN	RALB	Ras-related protein Ral-B	29958.5	35241.6	23077.5	31240.6	25085.5	17303.5	19634.2	32055	32352.4	58281.9	24790.2	27177.8	20931.9	28172.3	24033.3	97493.8	30882.8	32898	32969.9	30692.4	42464	33843.1	47831	28663.4	35124.3	26525.7	24446	25630.1	31253.9	28557.3	33222.8	37868.4	34100.4	38429.9	47318.4	40073.8	25125.2	32530.7	28173.8	26505.9	25495.7		31159.9	44778.8	47154.4
P11274	P11274	BCR_HUMAN	BCR	Breakpoint cluster region protein	10294.7	10281.1	10238	11378	20273.7	19461.1	15364.5	12267.9	10616.4	21962.7	11755.5	9765.21	24067.3	22425.6	18527.3	40047.6	24329.3	14575.8	11599.8	13752.3	12508.1	9754.17	9258.08	21699.2	23406.9	21772.4	23586.5	22213.7	21807.6	12251.7	10876.8	14621.3	10087.4	10919.9	10033.5	10666.4	24896.8	10844.5	25273.6	21397.4	23545.9	16609.9	23281.9	13583.1	10716.9
P11277	P11277	SPTB1_HUMAN	SPTB	Spectrin beta chain, erythrocytic	21796.2	16615.4	20202.3	13469.1	24045.7	29777.6	24507.9	18764.1	20657.1	33674.6	17257.8	31353.8	19180.6	25762.6	30394.5	62242.2	24088.4	11479.9	18643.9	31163.2	11500.1	17626.6	8816.64	34579.7	25869	26734.1	27888.1	32810.6	22385.7	8598.24	21971.3	31007.8	9621.69	6727.97	10858.9	22193.7	17699.5	44388.1	28905.7	26767.6	25010.9	45657.9	35440.9	35621.8	14056.6
P11279	P11279	LAMP1_HUMAN	LAMP1	Lysosome-associated membrane glycoprotein 1	25686.3	23789	15949.8	37637.7	18432.5	20815.9	19677.9	35899.2	25953.3	34865.1	28954.1	28869.8	32920.8	35640.2	19575.6	46378.5	28994	36201	34702.4	37798.5	50369.9	21024.5	36222.8	19191.3	39313.6	36892.6	27260.3	21715.6	30867.3	35432.7	37871.6	24187.6	28553.4	27851.3	24224.5	38057.1	36704.6	19185.4	30204.3	27020.5	24604.5	35936	37907.6	40482.7	37227.9
P11310	P11310	ACADM_HUMAN	ACADM	Medium-chain specific acyl-CoA dehydrogenase, mitochondrial	58839	50952.5	47534.7	44983.7	73564.6	74469.9	64792.5	59052.3	40050.1	39061.9	82175.7	32167.1	86901.1	75188	117219	107857	62030.7	62228.3	64159.3	83620.7	70677.3	46514.9	58722.3	67501.9	90542.1	100141	67332.2	67445.9	82542.3	43829.5	75946.2	76475.5	67309.8	42646.3	47760.9	44572.5	70353.5	108012	84751.3	87250.3	79815	68999.1	54851.6	90830.7	80061.4
P11387	P11387	TOP1_HUMAN	TOP1	DNA topoisomerase 1				4784.65	3255.33						3578.66		3691.52	3981.09			3869.68			3981.11	2948.66	4411.77			2246.88		4244.7	2917.03	4025.88				5899.31	4656.82		3723.61				4638.49				4492.01
P11413	P11413	G6PD_HUMAN	G6PD	Glucose-6-phosphate 1-dehydrogenase	99882.3	103723	96377.3	100147	71365.2	69365.9	76062.6	103705	103196	87994.2	106722	96045.5	79930	71157.4	64172.4	137039	85632	117629	103795	84851.5	110591	97739.8	100774	68852.1	77567.8	65347.7	84796.5	67359.8	74159.3	99952.1	103557	86745.6	121464	101518	110616	98860	72771.6	82985.8	67247.8	74781.9	72618.8	64288.4	77278	90101.7	104563
P11441	P11441	UBL4A_HUMAN	UBL4A	Ubiquitin-like protein 4A	31363.7	35569	35574	30809.6	31757.2	33287.3	29741.2	38285.2	32607.7	38354	43650.4	33376.7	25795.8	34575.2	38418.5	53332.8	37559.7	28586.4	35565.8	25500.3	31312.4	43767.1	33745.2	24279.8	36331	24135.2	39789.7	36635.5	37936.4	30898.9	29717.1	32616.4	36579.8	38057.6	41864.9	33646.8	23942.2	21526.9	36655.7	29072.1	22873.6	30568.6	30830.3	27249.3	40409.2
P11498	P11498	PYC_HUMAN	PC	Pyruvate carboxylase, mitochondrial	100397	104972	109940	80687.5	149214	121379	125155	105694	94345.1	156117	130311	75924.8	114239	102925	144081	158304	112284	103665	109836	131653	100395	100199	86900.1	114457	113130	120042	127837	125691	115741	93025.7	103373	119863	140216	114350	170547	99632.4	118738	167980	114618	136439	139664	201507	125931	116479	108420
P11532	P11532	DMD_HUMAN	DMD	Dystrophin	13925.2	12679.3	15024.1	11921.9	12906.7	25729.9	19185.8	15909.3	15283.9	18294.6	13189.3	11556.9	22823	15215	18018	36894.5	16412.6	13283.7	12805.7	14619.2	8466.8	18161	6373.87	20111.4	13472.9	17691.4	16099.1	15218.1	15798.5	15157	9929.12	15478.7	12086.6	11244.3	14014.6	12475.4	19338.8	18056.7	14869.6	17084.4	22662.1	27134.2	16952.2	18220.9	11019.5
P11586	P11586	C1TC_HUMAN	MTHFD1	C-1-tetrahydrofolate synthase, cytoplasmic	137064	146660	132288	148052	161775	238678	196010	157398	141279	166156	163805	123308	258843	237513	235314	278511	294394	153063	135540	128749	152739	166948	134207	195290	206877	194023	244894	222984	197007	133960	137016	147589	154924	153679	140024	136393	220321	114903	240283	249970	269849	155989	232808	153155	149670
P11717	P11717	MPRI_HUMAN	IGF2R	Cation-independent mannose-6-phosphate receptor			3671.78		4470.54									5479.65	5065.36						4630.13			3587.4	5995.31	6701.96	3902.52		4905.13			4902.38				3724.29	5498.27							5931.7
P11766	P11766	ADHX_HUMAN	ADH5	Alcohol dehydrogenase class-3	60761	69019.5	63639.3	59066.3	62673.9	61277.7	62875.6	65924.3	69874.7	94936	81909.8	60107.7	82607.2	83183.6	69872.5	203584	79181.7	59991.3	64859.6	78418.9	68320	58548.2	79966.7	50880.9	101090	70491.2	61621	47635.5	67544.2	74503.8	75896	79110.3	77251	61107	62462.4	81585.7	80791.5	67921	65477.1	77374.8	81536.7	62534.2	68586.7	78896.3	76143.2
P11844	P07315;P11844;P07316	CRGA_HUMAN	CRYGA	Gamma-crystallin A
P11908	P11908	PRPS2_HUMAN	PRPS2	Ribose-phosphate pyrophosphokinase 2	16178.3	14730.4		18984.5	7516.19			16411.5	21559.6	24199.3	13881	18352.1		8353.08	11735.3		10796.3					21738.4			8102.8		15565.9	12710	12306.1		15633.2	21367	20142	19339.4	23176	14164.5		10274.2		14531.6	9505.24	14627.5	11142.7
P11940	P11940;Q4VXU2	PABP1_HUMAN	PABPC1	Polyadenylate-binding protein 1	71900.4	69125.8	74628.1	65460.2	59755.6	69762.1	49764.7	66925.7	71301.9	104002	69827	65571.3	61833.9	62190.3	79691.4	73725.6	60997.5	69371.2	59740.9	60799.9	62139.9	62466.6	52817.9	58798.8	54342.6	54888.7	61838.1	64841.9	64735.4	68280.4	73797.4	53662.5	69683.8	64088.3	64842	64066.9	55345.8	86518.3	66976.7	63155.2	54902.3	62381.1	60923.9	69620.7	59360.8
P12035	P12035	K2C3_HUMAN	KRT3	Keratin, type II cytoskeletal 3																		524911		727797					22516.9	581568				561981	577065
P12036	P12036	NFH_HUMAN	NEFH	Neurofilament heavy polypeptide	2424250	2759790	2744040	2260470	653614	628324	491433	1856050	2818600	2012430	1151690	2217800	476863	459130	547122	1136710	322129	1432730	2635170	1444590	1556430	1976010	1610500	501918	378506	493853	415279	426502	436257	2819560	2945330	467161	1835500	2919600	1558680	3276000	645185	1379950	504968	524881	461951	690620	543531	1291350	3003280
P12074	P12074	CX6A1_HUMAN	COX6A1	Cytochrome c oxidase subunit 6A1, mitochondrial
P12081	P12081;P49590	HARS1_HUMAN	HARS1	Histidine--tRNA ligase, cytoplasmic	87548.9	105951	102336	98858.3	70623.3	75721	52764.9	85539.4	92543.9	117430	93349.5	91393.9	57421.6	65790.5	75559.3	128818	58460.5	84170	104526	94551.7	83093.9	80763.9	100283	70794.7	63722.4	70216.1	57416.3	63821.4	66171.9	110002	94372.4	77729	96442.5	108253	84319.2	100903	74769.7	76353.5	72267.4	71505.2	66197.3	86340	69901.4	95539.8	114815
P12109	P12109	CO6A1_HUMAN	COL6A1	Collagen alpha-1(VI) chain	44781.8	72781.1	35789.7	24490.3	50570	19491.1	24651	22536.1	32719	47315.9	20991.5	40313.1	23377.6	11370.7	19716.9	48964.5	26256.4	38700	50387	21335.9	24209.3	47259.1	24757.9	23153.5	21859.4	20014.5	22122	15922.1	14336.4	42144.7	34534.3	34285.3	34581.2	39361.3	26045.3	27510	21925.3	20794.9	17936.7	18910.9	19140.2	66189.4	17698.8	20942.2	53207.6
P12110	P12110	CO6A2_HUMAN	COL6A2	Collagen alpha-2(VI) chain	23844.4	39254.8	17407.5	14444.6	42307.7	8962.08	8433.33	17088.9	19407.6	40805	15271.7	17233.9	9835.56	11412	9463.33	43281	13736.1	24448.4	40478.3	13882	17002.4	22534.4	15434	11395.5	15604.1	13844.7	11759.2	8044.38	9057.52	23077.3	19360.8	20061.4	17737.5	22193.3	19250.8	16283.4	13414.2	9425.11	11041	6821.7	7867.49	53820.9	8850.07	10081.6	37490.3
P12111	P12111	CO6A3_HUMAN	COL6A3	Collagen alpha-3(VI) chain	96018.8	160709	69225.7	67472	142590	31244.6	35621.3	64902.6	63359.7	62256.4	54547.8	82144.1	52952.7	27663.9	34732.9	68073.2	56582.9	114689	166343	60501.6	70858.6	97806.7	68931.8	46764.8	51815.6	55135.8	35750.1	26318.4	30668.3	98675.9	91271.8	82233.6	76669.3	94510.3	66035.9	66656.5	57121.2	36408.8	45221.7	31789.8	34721	71958.2	35247.1	46326.7	134661
P12235	P12235	ADT1_HUMAN	SLC25A4	ADP/ATP translocase 1	250466	264444	221846	234499	153438	542441	485393	233791	263569	612937	255762	274166	592188	781412	563215	1698140	552473	159599	181101	415814	344400	281467	312733	426287	597502	316030	719606	568873	617422	234631	180323	656955	405402	431883	296069	423572	612881	414962	653624	812125	835005	567735	916492	578910	292451
P12236	P12236	ADT3_HUMAN	SLC25A6	ADP/ATP translocase 3	59322.8	28069.1	37137.2	46573.4	77461.3	117197	108342	50236.4	75287.2	117302	55357.1	54006	181866	188583	126751	80596.8	163638	53540.1	42919.7	98132.1	57615.5	37254.5	53001.6	92924.6	100925	92207.5	132619	93173.4	148513	46860	118333	97160.8	81515.3	84437.8	38587.1	111147	97654.3	143438	106960	136588	170571	114534	145819	118162	57709
P12268	P12268	IMDH2_HUMAN	IMPDH2	Inosine-5'-monophosphate dehydrogenase 2	28833.2	26477.2	31629.3	28321.3	28995	29426.4	27792.8	27735.9	26074.3	47291.7	32502.9	24168.8	35148.7	24981.7	30185.6	80957.8	30405.5	32636.9	29028.4	26651.7	27524.8	24985.4	28579.1	26623	26987.6	33758.9	25799.3	25980.3	23203.8	30353	30162	33413.3	24707.8	27750.8	30102.9	27340.9	30519.3	23006.7	30536.1	25881.4	30894.1	32632.2	28996	24522.2	25019.6
P12270	P12270	TPR_HUMAN	TPR	Nucleoprotein TPR	17538.4	17255.7	19486	16004.5	15806.6	13198.9	14337.6	17678.2	15397.1	17876.1	13541.3	17562.6	13101.5	11311	11650	14623.6	13918.9	19176.7	15653.4	17628.7	13199.4	18048.7	10742.9	16221.6	12201.4	13801.3	11286.8	11820.1	14250.4	15398.2	17664.2	15565.4	18527.6	14817	18084.5	15295.2	11732.9	19615.9	11606.6	11622.6	11643.3	15753.9	11848.4	15907.5	14463.5
P12273	P12273	PIP_HUMAN	PIP	Prolactin-inducible protein	49577.1	55246.3	38236.3	169931	18866.5	38479.2	96878.3	94613.7	106062	65854.1	61932.5	142341	36836	32097.5	75801.5	27157.3	4524.36	199734	197418	213731	50141.4	32640.5	43002.2	25617.8	78581.6	291031	17366.3	54159.8	29480.4	219052	140952	193447	43195.4	55427.8	32611.9	26273.8	273773	88500.6	36445.1	34558.6	31521.1	159551	29619.8	23501	123004
P12277	P12277	KCRB_HUMAN	CKB	Creatine kinase B-type	2312650	2796550	2474600	2169880	3084990	3491510	3434590	2858010	2572820	3626460	2896400	2117250	3408860	3006470	3272090	6324580	3350200	2644590	2358340	2139920	2348380	2667200	2268520	3192940	3356710	3079510	3229890	3393670	2786910	2747310	2744670	2044180	2956890	2915840	3402070	2574710	3928600	2884200	3211090	3163460	3937120	3973760	3604560	2388830	2693410
P12314	P12314	FCGR1_HUMAN	FCGR1A	High affinity immunoglobulin gamma Fc receptor I	9280.23	8163.59	10506.3	8993.81		6792.8			8257.95		7947.26		9398.22	9855.4	5039.84		8358.09	11246.4	10354.1	6683		8636.55	14147.7	6018.08	12807.8			6640.02	8272.04	16790.3	12540.2	11522.8	17584.5	14483.3	9719.86	15360.3	14379.1	9990.54	10713.6	11585.4	13876.9		9157.1	8027.92	11977.3
P12429	P12429	ANXA3_HUMAN	ANXA3	Annexin A3	55922.1	50307.1	58499.8	50883.6	72673.2	90157.7	67381	63525.2	56555.7	83877.5	37971.1	62113.1	71443.5	57856.9	77015.4	157009	75534.5	52283.6	58325.8	102626	30410.2	65646.6	41984.9	66403.5	76621.7	83034.3	67222.2	78592.6	89680.6	48372	65529.5	93298.6	53206.1	61605.6	24818.3	42491.5	82144	99918.5	69414.3	81482.3	85951.1	47957.1	73138.4	86014.4	46779.3
P12524;P12525	P12524;P12525	MYCL_HUMAN;MYCP1_HUMAN	MYCL;MYCLP1	Protein L-Myc
P12532	P12532	KCRU_HUMAN	CKMT1B	Creatine kinase U-type, mitochondrial	247619	336375	326088	291341	881404	1338650	1153860	388887	410440	871899	515146	366833	1195300	961081	1587820	2011670	1041760	412478	517560	535601	447736	290249	351632	782742	856947	731956	1007150	935987	851613	351198	681904	1212540	308718	390302	315367	403489	999687	1687960	1038230	973790	952094	698171	1498910	745276	314252
P12694	P12694	ODBA_HUMAN	BCKDHA	2-oxoisovalerate dehydrogenase subunit alpha, mitochondrial	28048.7	19977.7	22458.6	27194.4	38352.5	27736.3	24342.1	31639.4	23794.6	18256.7	21549.4	22098.5	33660.5	29673.7	30082.3	16764.9	31162.4	24172.4	24083.8	31063.3	21018.6	21520	16390.5	24773	28297.8	26136.3	24599.8	25257.6	28983.6	19762.5	26984.6	30175.8	25061.2	22817.5	24895.9	20920.7	23198.1	32957.4	23850.2	28940	35549.3	33029.7	24412	34702.8	26598.2
P12814	P12814	ACTN1_HUMAN	ACTN1	Alpha-actinin-1	35232.7	39392.9	39677.4	25801.6	46600	50289.2	50655.2	23994.9	32177.3	47000.7	23050.4	28164.6	47182.6	41716.3	45052.8	97686.8	56546.7	28614.3	25944.7	26745	20255.6	46282.1	24344.4	54839.7	35990.5	44035.6	53437.9	50164.6	46737.6	31427.7	31816.3	35516.3	26783.6	27573	27580.7	26910	46341.5	31723.1	54520.4	46646.3	52532.7	54102.9	46092.7	27095.1	25674.1
P12821	P12821	ACE_HUMAN	ACE	Angiotensin-converting enzyme					19426.7	21979.5	21732.9						28413.5	27913.6	15354.1	53147.4	26789.4							24218.2	27914.6	26936.6	24401.3	21572.9	20800.3			6754.64					18821.9		18513.3	20892.8	31653.6	21845.6	26391.5
P12882	Q9Y623;P13535;Q9UKX2;P11055;P12882	MYH1_HUMAN	MYH1	Myosin-1	19625	14471.2			11405.8	11907.5	9357.21	16802.3					12569		13179.3	24373.4	15058.2					10941.1				23995.7	8085.99							10156.8							12597.3		13484.4
P12931	P12931;P07947	SRC_HUMAN	SRC	Proto-oncogene tyrosine-protein kinase Src	16227.8	16631.8	19370.2	16878.5	27640	32558	24879.2	15700.5	19424.5	22729.6	15558.1	15093.4	42730	36818.1	25927.9	36953.1	43874.2	20672.6	11847.1	22620.7	15439.5	14876.5	17707.1	33537	38920.8	28250.2	30509.3	29783.6	37876	15867.1	18673.6	39570.5	15213.1	10429.6	15717.3	12392.2	31956.7	18375	36840.3	32998.7	31744.7	20062	29700.3	23255.5	16070.3
P12955	P12955	PEPD_HUMAN	PEPD	Xaa-Pro dipeptidase	66954.5	76412.1	75399.5	69883	43943.2	46846	41335.8	81331.6	75083.8	170007	95418.1	59759.3	45888.3	46815.5	57342.9	93807.1	47672.5	68190.9	92176.9	49160.1	72148.9	101526	86618.9	40457.3	56875.3	54531.5	37993.2	42698.8	39836.1	100838	63050.3	45528.4	110041	63955.9	72914.7	61676	44451.7	47151.6	49268.8	53015.4	38385.1	87511.3	33335.9	62829.6	66072.6
P12956	P12956	XRCC6_HUMAN	XRCC6	X-ray repair cross-complementing protein 6	66997.1	65987.5	63343.3	59804.1	51158.5	44625.3	47593.1	75178.7	52359.1	57965	64829	62676.2	50976.9	50406.4	49431	62168.2	50694.8	66041.3	60096	60039.6	67205	64249	61266.9	49057.5	46801.6	49477.9	38977.9	43735.5	44229.8	64129.7	62581.6	67428.5	77199.3	70001.7	73722.1	72469.9	43692.8	78181.9	41478.1	51168.1	51435.5	55819.1	49122.3	60702.8	57832.8
P13010	P13010	XRCC5_HUMAN	XRCC5	X-ray repair cross-complementing protein 5	77428.7	75577.1	70500.8	72564.4	46338.1	52891.3	56960.3	78297.3	61631.3	67876.3	67970.7	68214.2	65854.1	52433.4	54604	92986.3	55853	85263.5	69720.3	82879.2	64183.6	65039.9	59336.7	62388	50270.9	60270.8	45150.8	43414.3	50851.6	85953.9	81695.6	83807	95411.5	70353.5	81852.3	74960.4	58318.6	100086	52135	59468.4	60347.9	83967.1	49426.5	69060.2	64604.1
P13051	P13051	UNG_HUMAN	UNG	Uracil-DNA glycosylase														1343.58			679.687								1485.19				925.232												3042.8
P13073	P13073	COX41_HUMAN	COX4I1	Cytochrome c oxidase subunit 4 isoform 1, mitochondrial	181318	215403	145123	192235	494980	363488	300267	192571	170072	241898	352862	112055	424083	456892	413380	953371	431690	261188	255458	415408	339922	177724	291177	334441	369226	304441	431126	404072	416398	260256	286629	451258	303385	282820	273221	308317	574668	576747	504590	427965	451332	287205	507098	410540	256769
P13473	P13473	LAMP2_HUMAN	LAMP2	Lysosome-associated membrane glycoprotein 2	235884	157548	209282	246460	62255.7	152109	192729	310789	252292	398633	146641	304892	165772	293516	206968	262870	202960	235477	223725	186477	167982	189255	258341	147397	267664	201693	165675	158519	222595	194486	196365	115247	209101	197752	168537	206390	179131	168542	133925	168819	134920	224498	213038	258467	260985
P13489	P13489	RINI_HUMAN	RNH1	Ribonuclease inhibitor	469523	491026	453502	619333	370141	217651	216313	539888	529650	111202	403433	383067	313125	328221	229519	67637.3	282750	438358	323704	369406	483633	556785	387389	295334	287928	327467	310055	272176	256854	270344	433999	280913	457029	460574	471789	369403	169381	201491	254253	261289	312515	146325	254490	393060	444223
P13521	P13521	SCG2_HUMAN	SCG2	Secretogranin-2		18059.4	17359.2		206973	446178	308148		23731.5	82793.1	69568.6	223046	415452	425555	467620	226725	648694	42098.6	35167.3	111555	60340.3			190867	438828	264160	644093	446323	410418	21856.6		270466	30174.6				333226	45110.9	280817	505042	312947	111360	353945	61171.7	15293.4
P13591	P13591	NCAM1_HUMAN	NCAM1	Neural cell adhesion molecule 1	243340	280324	223840	224749	348344	371980	336689	289205	256646	314126	370500	221944	397416	443719	445746	363259	513767	431673	299822	274983	356514	261395	308307	304033	404799	331485	435012	384857	431968	309315	253664	565827	337874	257859	319888	366978	385500	240721	431806	375859	376392	240517	449801	316237	323963
P13611	P13611	CSPG2_HUMAN	VCAN	Versican core protein	1535870	1261630	771776	1067190	481484	256165	349141	1091050	1312590	737477	1221750	1009480	395272	556784	414680	904393	629388	966494	1167640	794644	1603560	956754	1055920	300466	724007	463632	385636	263538	395241	1109110	1079400	545717	1236540	1063450	1117800	1130280	368107	507185	380002	357789	331859	394590	324406	880610	1234110
P13637	P13637	AT1A3_HUMAN	ATP1A3	Sodium/potassium-transporting ATPase subunit alpha-3	601258	709078	687012	738431	550135	513672	549771	725237	752079	801737	727388	721549	479990	551529	612097	1278840	596521	746379	754873	791637	769043	640186	738131	560134	578013	501948	506329	491605	561874	731163	824574	937350	781900	797349	683531	846234	592345	686701	538234	557118	546027	628352	568398	980765	797949
P13639	P13639	EF2_HUMAN	EEF2	Elongation factor 2	126604	104497	125341	110984	132056	144177	137247	118087	111104	115866	120900	116208	131181	121729	157698	142860	100989	106717	111339	128100	107080	106773	101370	155208	101373	122259	122636	121132	138498	116988	130318	118967	118524	124883	103492	129771	129809	166173	123087	128653	118163	133112	126662	126065	114498
P13645	P13645	K1C10_HUMAN	KRT10	Keratin, type I cytoskeletal 10	2292860	1885430	1553930	4375460	1763960	893103	2657320	1525880	2515190	2414610	5486820	4681190	1001820	897981	1712610	1843890	318817	4592700	5283490	4876150	1149730	2044760	1783670	974668	439364	3738800	528146	5418040	557552	5902960	5719330	1652790	4610550	3561910	1687870	1365410	6018610	2275760	1725270	2822710	2120590	6189600	4381540	628359	6479570
P13646	P19012;Q99456;P13646	K1C13_HUMAN	KRT13	Keratin, type I cytoskeletal 13			25892.4	16220			16801.2				84687.5	21685.3		19438	9344.34				22266.3						14950	181752				74084.4	176475	5801.52	13839.2	17654.2			52894	11236.5	10300.8			92407.9
P13647	P13647	K2C5_HUMAN	KRT5	Keratin, type II cytoskeletal 5	187668	241909	196989	293204	145665	105365	223402	246540	197685	278266	769223	500487	109017	99118.3	124752	205213	53668.4	497128	486944	600827	119461	134432	104800	86022.3	34016.1	369255	40395.1	235751	50046.2	541870	598781	115454	384616	209408	145740	112989	1066660	216903	113838	170635	132462	491259	434644	77808.9	516146
P13667	P13667	PDIA4_HUMAN	PDIA4	Protein disulfide-isomerase A4	54017.6	47566	57229.3	53723.1	46697.1	55918.5	47983.6	45076.5	53591.1	40304.4	47083.8	48967.6	47628.7	43752.6	49202.3	79806.6	36150.1	40026.7	33108.4	46421.5	37680.6	28308.6	37885.7	50421.9	30431.9	48163.3	41890.1	34222.8	42781.2	45518.5	51231.9	38917.5	53209.3	46364.7	40103.1	46339.5	44502.8	60454.9	42857.3	47475.8	52103.7	43305.7	45612	42183.2	47343.6
P13693	Q56UQ5;P13693	TCTP_HUMAN	TPT1	Translationally-controlled tumor protein	85424.6	92369.9	89798.1	82098.3	63985	78699.2	93848	76657.1	82576.9	82265.2	89666.3	80320.7	72181.1	65363.6	78495.2	170170	64620.1	79543.9	88782.2	67638.7	77207	77643.3	80185.4	85951.7	56875.3	55800.8	77823.3	66517.3	69202.4	115797	91773.9	60549.4	84252.3	92205.9	82155.3	84746.8	79195.5	65200.7	73747.2	75460.6	73012.4	70779.8	65537	60980.6	91344.1
P13716	P13716	HEM2_HUMAN	ALAD	Delta-aminolevulinic acid dehydratase	138058	94284.5	125955	77916.4	69469.9	87400.2	107826	123788	147375	207442	174698	128239	114400	100178	101996	313926	102560	142555	96358.6	78463.6	122633	111621	146295	76539.6	104665	93684.1	73810	92465.9	100261	116510	97948.2	95913.5	124610	100309	126727	71926.5	89361.6	102222	80849.5	80256.7	90852	120724	72272.3	85336.9	143038
P13726	P13726	TF_HUMAN	F3	Tissue factor
P13747	P13747	HLAE_HUMAN	HLA-E	HLA class I histocompatibility antigen, alpha chain E
P13762	P13762	DRB4_HUMAN	HLA-DRB4	HLA class II histocompatibility antigen, DR beta 4 chain
P13796	P13796	PLSL_HUMAN	LCP1	Plastin-2	36816.2	44059.2	47537.3	41459.7	26974.6	39044.1	32927.8	40694.3	41090.4	29807.3	31873.1	41335.8	37879.9	31738.2	30658.9	28521.8	35669	50227.9	37918.5	34069.4	32029.8	42397.7	33864.7	40608	28066.9	38054.9	24237.5	28293	27684.8	53073.4	45679.6	28630.3	58718.1	49312.7	34243.6	47131	35191.5	35639.9	28840.8	40995	46247.6	39186.6	29580.5	35637.3	45903.5
P13797	P13797	PLST_HUMAN	PLS3	Plastin-3	210539	214995	211274	217405	103477	93253.4	107189	239397	263181	206867	246087	218585	97554	122319	104889	153454	84594.9	288284	182490	163514	208487	206431	220137	92883.2	112342	121625	86371.1	93843.7	109283	164630	185667	107425	251054	246909	244282	227211	79175.3	148947	80210.4	93776.1	114740	151445	99091.1	188977	215539
P13798	P13798	ACPH_HUMAN	APEH	Acylamino-acid-releasing enzyme	74095.7	83271.1	70959	83326.2	85959.8	72256.1	76388.9	86915.7	82690.1	112055	94980.7	73197.4	75906.2	94051	87286.8	84967.1	88144.5	91800	73693.5	75998.3	96822.7	72870.8	87339.3	82956.3	73077.4	83661.9	94083.3	81469.1	81271.7	91258.6	77863	65852	88010	88296.7	71548.5	82653.1	89538	54015.4	90080.7	80057.5	75270.6	133115	79034.7	89240.5	92457.7
P13804	P13804	ETFA_HUMAN	ETFA	Electron transfer flavoprotein subunit alpha, mitochondrial	90081.1	94519.2	87503.1	85795.6	151776	139020	138724	95404.6	78878.6	191338	95569.1	84942.5	146477	101639	144051	184826	133701	104933	83128.6	121298	68869.4	91360.2	78250.2	139739	124218	120351	156086	138562	114641	84157.1	105410	133466	114387	95438.2	122625	89222.5	141531	186282	126273	148269	146653	173454	151408	145695	86874.2
P13807	P13807	GYS1_HUMAN	GYS1	Glycogen [starch] synthase, muscle	63472.9	78838.9	64342.9	48710.4	70370.4	65180.1	73163.7	84173.7	58802.3	82947.8	57108	68975.1	63806	58427.1	51591.4	158074	69162.6	71482.8	64329.6	92583.5	81705.9	75310.3	63668.9	71493.5	63411.3	63495.5	65706.9	55232.2	54907.3	78286.4	65209.5	76468.7	65984.7	63336.7	86068.4	70700.1	74425.4	68341.5	55401.7	54836.4	70616.3	113003	50509.4	84987.2	61171.3
[truncated: 4,794 more rows]
[truncated: 132 more columns]

## Sheet: Sheet2
test	gene	logFC	AveExpr	P.Value	adj.P.Val	min_psms	sca.adj.pval	significant
[truncated: 24,822 more rows]

## Sheet: Sheet3
test	gene	logFC	AveExpr	P.Value	adj.P.Val	min_psms	sca.adj.pval	significant
[truncated: 27,265 more rows]
