# Supplementary material for: Spatial Multi-Omics Identifies Early Synaptic Pruning and Context-Specific Dopaminergic Vulnerability in Synucleinopathies
Source: Research Square preprint supplement (doi:10.21203/rs.3.rs-7852229/v1), 2025-11-06
Supplement: Supplementary file 2 [file 6b0300ef2edc157fee698025.docx]

**Supplemental Information:**

Spatial Multi-Omics Identifies Early Synaptic Pruning and Context-Specific Dopaminergic Vulnerability in Synucleinopathies

1. **Supplemental Methods and Materials:**

**Generation of α-Syn PFFs:** Recombinant α-Syn proteins were purified, and in vitro fibrils were assembled according to established protocols 1,2. Full-length wild-type mouse α-Syn at a concentration of 5 mg/ml was used for fibril assembly. The assembly reactions were performed under continuous agitation using an Eppendorf orbital mixer set to 1,000 rpm at 37°C. After a 7-day incubation period, the resulting PFFs were collected for subsequent experiments. After generating PFFs, they were aliquoted into single-use portions at room temperature. Prior to use in surgeries, two quality control assays—Thioflavin T (ThT) assay and sedimentation assay—were performed to confirm that α-Syn had aggregated into the desired conformation. For the ThT assay, a fresh 1 mM ThT stock solution was prepared in deionized water (dH₂O), filtered through a 0.2 μm syringe filter, and diluted in PBS (pH 7.4) to a final concentration of 25 μM in each well. α-Syn aliquots (monomer or aggregate, 5 mg/ml) were thawed to room temperature. Aggregates (10 μM) or monomers (100 μM) were added to the wells, and the plate was sealed and incubated at 37°C with shaking at 600 rpm for 30 min. ThT fluorescence was measured using a microplate reader (CLARIOstar Plus (BMG Labtech); excitation: 450 nm, emission: 485 nm) at 37°C. For sedimentation assay, PFFs (2 μL, 5 mg/mL) were diluted in 20 μL of PBS and subjected to ultracentrifugation (Beckman Optima MAX-XP) at 100,000 × g for 30 minutes at 25°C. After centrifugation, the supernatant was removed and mixed with 4× Laemmli buffer. The pellet was resuspended in 20 μL of PBS, mixed with 4× Laemmli buffer, and boiled at 95°C for 5 minutes. Equal volumes of the supernatant and pellet fractions were resolved on a 15% polyacrylamide gel, and protein bands were visualized using Coomassie Brilliant Blue staining.

**Stereotaxic Injection of PFF into mouse brain:** Harvested PFF aliquots were sonicated using a probe sonicator (Bandelin, Sonoplus Mini 20) prior to intracerebral administration. The sonication protocol consisted of four cycles at 30% amplitude for 15 seconds each (1-second pulse on, 2-second pulse off). During the experiment, sonicated PFFs were maintained at room temperature to prevent dissociation into monomers. Mice aged 2–3 months were anesthetized via intraperitoneal injection of an MMF solution (0.5 mg/kg Medetomidin, 5 mg/kg Midazolam, and 0.05 mg/kg Fentanyl). Stereotaxic injections of recombinant α-Syn fibrils (5 mg/mL) were performed bilaterally into the dorsal striatum using a Neurostar glass-capillary Nanoinjector. Control groups received sterile PBS injections. For the dorsal striatum, the glass pipette was positioned at the following coordinates relative to Bregma: anterior-posterior (AP) +0.2 mm, mediolateral (ML) +/-2.0 mm, and dorsoventral (DV) -3.8 mm beneath the dura mater. A total of 2 μl was injected per site at a flow rate of 200 nl/min. The pipette was held in place for 5 minutes after the injection to minimize reflux. After surgery, mice were given a subcutaneous injection of an AF solution (2.5 mg/kg Antipamezol and 0.5 mg/kg Flumazenil) to reverse anesthesia. Animals were monitored routinely during recovery. At 3 months post-injection (mpi), mice were sacrificed via ketamine/xylazine overdose for further analysis.

**PDGF-αSyn Transgenic Mice:** Mice expressing αSynunder the human Platelet-Derived Growth Factor (PDGF-αSynTg) were purchased from Jackson Laboratory (B6;D2-Tg(PDGFB-SNCA)4Ema/RoriJ; Strain No.: #038775).

**Acute Slice Preparation:** Coronal brain slices containing the substantia nigra pars compacta (SNc) were prepared from male C57BL/6J mice (postnatal day ~100, PN100). Mice were deeply anesthetized with isoflurane and transcardially perfused with 15 mL ice-cold, oxygenated glycerol-based artificial cerebrospinal fluid (GaCSF). The GaCSF was composed of (in mM): 250 glycerol, 2.5 KCl, 2 MgCl₂, 2 CaCl₂, 1.2 NaH₂PO₄, 10 HEPES, 26 NaHCO₃, and 5 glucose; pH was adjusted to 7.2 with 2.5 M NaOH, and osmolarity was ~310 mOsm. Following perfusion, the brain was rapidly removed by decapitation, and the frontal cortex and cerebellum were trimmed within 1 minute to isolate a midbrain tissue block. Coronal sections (270 μm) were cut using a vibratome (Campden Instruments 7000smz) in ice-cold, carbogenated (95% O₂ / 5% CO₂) GaCSF. Slices were then transferred to normal aCSF for recovery. The composition of aCSF was (in mM): 125 NaCl, 2.5 KCl, 2 MgCl₂, 2 CaCl₂, 1.2 NaH₂PO₄, 10 HEPES, 26 NaHCO₃, and 5 glucose, adjusted to pH 7.2 with 2.5 M NaOH, with final osmolarity ~310 mOsm. Slices were incubated at 35°C for 30 minutes in a water bath before further use. Human α-synuclein seeds were prepared from SAA-positive frontal cortex homogenate (10⁻² dilution) derived from a 74-year-old female patient clinically diagnosed with Lewy body dementia (LBD). For seed fragmentation, 100 μL of lysate was loaded into a 500 μL microcentrifuge tube and sonicated using a probe sonicator (Bandelin, Sonoplus mini-20), with 30% amplitude; 15s × 4 repetitions; 1s on, 2s off, ensuring the probe tip remained suspended in the center of the liquid without contacting the tube wall. A minimum 30-second interval was maintained between sonication cycles to minimize thermal effects. Following sonication, 100 μL of fragmented α-synuclein seeds were added directly to the slice incubation chamber containing oxygenated aCSF, and slices were incubated for 4 h at 32°C. Control slices were treated with the vehicle used during human tissue homogenization (0.5 M phosphate buffer, pH 8.0; 2 M NaCl; 0.05% SDS in 40 mM phosphate buffer). After incubation, slices were fixed in 4% paraformaldehyde (PFA) for 20 minutes at room temperature and stored in phosphate-buffered saline (PBS) at 4°C until immunofluorescence staining.

**Immunohistochemistry:** Mouse brains were collected following transcardial perfusion with PBS and 4% paraformaldehyde (PFA). Brains were post-fixed overnight in 4% PFA at 4°C. After post-fixation, PFA was discarded, and the brains were stored in PBS at 4°C. Tissues were sectioned using a vibratome (Leica VT1200S) into 50 μm-thick slices, which were stored in an antifreeze solution (30% ethylene glycol, 30% glycerol, and 40% PBS) at -20°C until further processing. Free-floating brain sections (50 μm) were washed in PBS before being subjected to antigen retrieval. Antigen retrieval was performed by incubating sections in Tris-Citrate buffer (10 mM sodium citrate, 0.05% Tween-20, pH 6.0) at 95°C in a water bath for 20 min. After cooling, sections were washed in PBS and permeabilized with 0.3% Triton X-100 in PBS for 4 hrs at room temperature on a shaker. Following permeabilization, sections were washed and incubated in blocking solution (2% bovine serum albumin, 5% donkey serum, and 0.3% Triton X-100 in PBS) for 1 hr at room temperature. The blocking solution was replaced with primary antibody diluted in the same buffer, and sections were incubated overnight at 4 °C on a shaker. The next day, sections were washed three times in PBS (10 min per wash) and incubated with fluorophore-conjugated, species-specific secondary antibodies prepared in the diluted blocking solution. Secondary antibody incubation was conducted for 2 hrs at room temperature in the dark. Following incubation, sections were washed thoroughly in PBS, mounted onto frosted microscope slides, and cover-slipped using DAPI fluorescent mounting medium for confocal imaging. Confocal images were acquired using a Zeiss LSM 900 or Leica Stellaris 5 microscope with a z-stack thickness of 25 μm. Image processing and signal enhancement were performed using FIJI software (version 1.54f). To quantify signals of specific markers, such as IDE and pS129, FIJI software was used for data analysis following a standardized protocol. Z-stack images were saved in TIFF RGB format and converted to 8-bit grayscale. Images were processed via Z-projection at maximum intensity, and brightness curves were adjusted to ensure high-intensity regions did not obscure other areas of interest. Uniform trimming and filtering parameters were applied consistently across all images. Thresholding was performed using the default method to convert images into binary format, highlighting regions of interest. Using FIJI’s "Set Measurements" tool, the “area” and “area fraction” options were selected, and the “Measure” function was used to calculate the percentage area (% Area), representing the density of signal for the targeted marker. Details of the primary and secondary antibodies, along with their respective concentrations, are listed in **Supp. Table 1**.

**Autoradiography:**[18F]DPA-714 autoradiography from formalin-fixed and paraffin-embedded tissue blocks from 30 cases with different neurodegenerative diseases and controls was processed. Deparaffinized sections were incubated for 60 min (135.1 µCi/ml after dilution to a volume of 60 ml with phosphate buffered saline solution, pH 7.4, molecular activity 3961 GBq/µmol at the end of synthesis). Washing was performed by PBS for 1 min, 70% ethanol/PBS for 2 min, 30% ethanol/PBS for 1 min and PBS for 1 min to remove unbound radiotracer. After drying at room temperature for 60 min, the sections were placed on Fujifilm BAS cassette2 2025 imaging plates. The plates were exposed for approximately 15 h and then scanned at 25.0 µm resolution with the Elysia-raytest equipment (CR-35 BIO, Dürr Medical, Bietigheim-Bissingen, Germany). Resulting images were analysed with a dedicated software (AIDA image analysis, V4.50, Elysia-raytest, Straubenhardt, Germany). To investigate TSPO-related [18F]DPA-714 signal in the midbrain, a region of interest was drawn in the SNpc on each sample. A TSPO-negative region in the white matter fiber tract was determined as a reference region. Ratios between target regions and the reference region were calculated and correlated with the AUC extracted from SAA data.

1. **Supplemental Figure Legends:**

**Supplemental Table 1:** Mean weights (fraction per spot) for each cluster and deconvoluted cell type, determined using the RCTD/SpatialExperiment (spacexr) package. Cell type annotations and reference dataset are from Kamath, Abdulraouf et al.3  Redundant sub-clusters (e.g., Olig_ENPP6_EMILIN2 and Olig_PLXDC2_SFRP1) were merged as described in the main text.

**Supplemental Table 2:** Results from proteomic profiling of midbrain SNpc and ventral fiber tract clusters from post-mortem human tissue.

**Supplemental Figure 1: a**, Bar graph showing the number of cases analysed/Braak stage. **b**, Bar graph showing the donor age (years) across the five cohorts, with no significant differences observed. **b**, Bar graph representing the distribution of male and female donors in each cohort. **c**, Bar graph depicting tissue fixation time (days) across cohorts. **d**, Bar graph illustrating postmortem interval (hours) across cohorts. Statistical significance in a, b, and d was assessed using two-way ANOVA with Dunnett’s multiple comparisons test.
**e**, Bar graph displaying the number of cases per LB Braak stage.

**Supplemental Figure 2:** Representative photomicrographs showing tyrosine hydroxylase (TH; green) and αSyn proximity ligation assay (αSyn-PLA) labeling in tissue sections from all five cohorts. αSyn-PLA signal was prominent in PD and AD+LBP, consistent with the presence of αSyn oligomers >40 nm.

**Supplemental Figure 3:** Correlation between mean seed amplification assay area under the curve (SAA–AUC), Braak stage, and the number of pigmented neurons per tissue section. Data points are color-coded by cohort: green, Ctrl; light blue, iLBD; dark blue, PD; orange, AD; red, AD+LBP. Panels a–d show correlations for the entire dataset. Panels e and g show correlations between pigmented neurons per section and either SAA–AUC (e) or Braak stage (g) for the Ctrl, iLBD, and PD groups. Panels f and h show the same analyses for the AD and AD+LBP groups. Pearson’s coefficients of determination (R²) were calculated for panels b, d, e, and f; Spearman’s rank correlation coefficient (r) was calculated for panels a, c, and g, and for all analyses involving non-parametric data (Braak stage).

**Supplemental Figure 4:** Bar graph and table showing the number of differentially expressed genes (DEGs) between the indicated groups in the respective gene clusters indicated in the lower table (left side). CerPed, cerebral peduncle; fibers; SNpc, substantia nigra pars compacta; SNpr, substantia nigra pars reticulata; SNtrans, substantia nigra transition zone. Red bars indicate upregulated genes; green bars indicate downregulated genes.

**Supplemental Figure 5: a,** Bar graph showing the number of proteins detected by mass spectrometry (MS) in each cohort. **b,** Venn diagram showing the overlap of detected proteins between clusters and the number of proteins unique to each cluster.

**Supplemental Figure 6: a–f,** Volcano plots showing the absence of significantly differentially expressed proteins (DEPs) in the SNpc cluster across the indicated comparisons.

**Supplemental Figure 7**: Effect sizes for the relationship between C1QC expression and surrounding, deconvoluted cell types per spot and spatially defined cluster. The effect size for the linear model is given on the x-axis, while p-values are color-coded on a -log10 scale. The most significant cell type enrichment for C1QC expression is seen for microglia (MG_TSPO_VIM) across all clusters, while the enrichment for inhibitory neurons (Inh_PAX5_VCAN) is exclusive to the SNpc cluster, with the strongest effect size.

**Supplemental Figure 8: a,** Photomicrographs showing tyrosine hydroxylase (TH), C1QC, and phosphorylated Ser129–α-synuclein (pS129–αSyn) in animals injected with either preformed fibrils (PFFs) or PBS into the striatum, 3 months post-injection (scale bar, 10 μm). Third row: higher magnification images (scale bar, 2 μm). **b,** Bar graphs showing the percentage of C1QC per cell (left) and the total C1QC area (right) in the striatum and substantia nigra pars compacta (SNpc). **c,** Bar graph showing the percentage of C1QC per TH-positive neuron. **d,** Photomicrographs showing TH, C1QC, and pS129–αSyn in acute brain slices treated for 6 h with human αSyn amplificates derived from seed amplification assays (SAA) of clinical Lewy body pathology (LBP) cases. **e,** Bar graphs showing the C1QC area (left) and the percentage of C1QC per TH-positive neuron (right). Statistical significance in b, c, and e was assessed using unpaired t-tests.

**Supplemental Figure 9 a,b,** Photomicrographs and corresponding bar graphs depicting TH and C1QC expression in SNpc tissue sections from wild-type (WT) and αSyn transgenic (Tg) mice. No difference in C1QC abundance was observed between the two groups. Statistical significance in panels b, c, and e was evaluated using unpaired t-tests. Scale bar: 20 μm.

**Supplemental Figure 10: a,b,** Photomicrographs and bar graphs from all five cohorts showing comparable binding of [18F]DPA-714 across cohorts. **c,** Graph showing no significant correlation between mean seed amplification assay area under the curve (SAA–AUC) and translocator protein (TSPO) signal. Pearson’s coefficient of determination (R²) was used to assess correlation.

1. **Supplemental References**

1. Luk, K. C. *et al.* Intracerebral inoculation of pathological α-synuclein initiates a rapidly progressive neurodegenerative α-synucleinopathy in mice. *J. Exp. Med.* **209**, 975–986 (2012).

2. Luk, K. C. *et al.* Exogenous α-synuclein fibrils seed the formation of Lewy body-like intracellular inclusions in cultured cells. *Proc. Natl. Acad. Sci.* **106**, 20051–20056 (2009).

3. Kamath, T. *et al.* Single-cell genomic profiling of human dopamine neurons identifies a population that selectively degenerates in Parkinson’s disease. *Nat Neurosci* **25**, 588–595 (2022).
