# Supplementary material for: Spatial Multi-Omics Identifies Early Synaptic Pruning and Context-Specific Dopaminergic Vulnerability in Synucleinopathies
Source: Research Square preprint supplement (doi:10.21203/rs.3.rs-7852229/v1), 2025-11-06
Supplement: Supplementary file 3 [file bb36b21f1f949e7cbe179661.xlsx]

## Sheet: celltype_weights_by_cluster
Supp. Table 1: Mean weights (fraction per spot) per cluster per deconvoluted celltype (through RCTD/spacexr package). Annotations and reference datset are from Kamath, Abdulraouf et al., PMID 35513515.
cluster	celltype	mean_weight	ct_group
CerPed	Astro_CYP4F12	0.00115863	Astro
CerPed	Astro_GBP2_SPOCD1	0.00381632	Astro
CerPed	Astro_GJB6_OXTR	0.00183448	Astro
CerPed	Astro_GLYATL2	0.00347702	Astro
CerPed	Astro_GUCY1A2	0.0123868	Astro
CerPed	Astro_SERPINA3	0.00161323	Astro
CerPed	Astro_SIDT1	0.000445962	Astro
CerPed	Astro_VIM_LHX2	0.00824282	Astro
CerPed	Astro_VIM_TNFSRF12A	0.154643	Astro
CerPed	CALB1_CALCR	0.000432815	Neuron (DA)
CerPed	CALB1_CRYM_CCDC68	0.000125156	Neuron (DA)
CerPed	CALB1_GEM	0.000909314	Neuron (DA)
CerPed	CALB1_PPP1R17	0.00190355	Neuron (DA)
CerPed	CALB1_RBP4	0.00666724	Neuron (DA)
CerPed	CALB1_TRHR	0.00122339	Neuron (DA)
CerPed	Endo_COL6A3	0.00684894	Vascular
CerPed	Endo_DCN_ABCC9	0.0349037	Vascular
CerPed	Endo_IL27RA	0.0302512	Vascular
CerPed	Endo_MET	0.00405263	Vascular
CerPed	Endo_NOTCH3_PLK2	0.101148	Vascular
CerPed	Endo_SLIT3	0.0243182	Vascular
CerPed	Endo_SNTG2	0.013478	Vascular
CerPed	Ependyma_ZBBX	0.00185523	Ependyma_ZBBX
CerPed	Ex_CYP2J2	0.00770174	Neuron (non-DA)
CerPed	Ex_EBF2_CTC-552D5.1	0.00072667	Neuron (non-DA)
CerPed	Ex_LAMP5_BAIAP3	0.0429161	Neuron (non-DA)
CerPed	Ex_LAMP5_NTNG2	0.186218	Neuron (non-DA)
CerPed	Ex_MYO5B	0.00212497	Neuron (non-DA)
CerPed	Ex_OPRD1	0.00211618	Neuron (non-DA)
CerPed	Ex_POSTN	0.000398438	Neuron (non-DA)
CerPed	Ex_PPP1R1C	0.00182407	Neuron (non-DA)
CerPed	Ex_SATB2	0.0003504	Neuron (non-DA)
CerPed	Ex_VWA5B1_CALB1	0.000492294	Neuron (non-DA)
CerPed	Inh_IGFBP5	0.0018901	Inh_IGFBP5
CerPed	Inh_INHBA	0.00285218	Inh_INHBA
CerPed	Inh_OTX2_CASR	0.0124503	Inh_OTX2_CASR
CerPed	Inh_PAX5_CCBE1	0.00172007	Inh_PAX5_CCBE1
CerPed	Inh_PAX5_VCAN	0.000323449	Inh_PAX5_VCAN
CerPed	Inh_PRLR_RP11-384J4.2	0.000337176	Inh_PRLR_RP11-384J4.2
CerPed	Inh_SIX3	0.00606402	Inh_SIX3
CerPed	MG_CCL3	0.00265341	MG_CCL3
CerPed	MG_CECR2_FGL1	0.00245015	MG_CECR2_FGL1
CerPed	MG_FOSL2	0.00353721	MG_FOSL2
CerPed	MG_GPNMB_LPL	0.00587817	MG_GPNMB_LPL
CerPed	MG_GPNMB_SULT1C2	0.00368814	MG_GPNMB_SULT1C2
CerPed	MG_GPNMB_SUSD1	0.00190439	MG_GPNMB_SUSD1
CerPed	MG_MGAM	0.00443087	MG_MGAM
CerPed	MG_MKI67	0.00213532	MG_MKI67
CerPed	MG_OPRM1	0.00385838	MG_OPRM1
CerPed	MG_SPON1	0.000463733	MG_SPON1
CerPed	MG_TSPO_VIM	0.022771	MG_TSPO_VIM
CerPed	Macro_CD200R1	0.00404389	Macro_CD200R1
CerPed	OPC_ADM	0.00227308	OPC_ADM
CerPed	OPC_CACNG4	0.00167506	OPC_CACNG4
CerPed	OPC_HOXD3	0.000968251	OPC_HOXD3
CerPed	OPC_KIAA0040	0.00361042	OPC_KIAA0040
CerPed	OPC_MDFI	0.00250411	OPC_MDFI
CerPed	Olig_ENPP6_ACTN2	0.00628518	Oligo
CerPed	Olig_ENPP6_EMILIN2	0.12967	Oligo
CerPed	Olig_ENPP6_LUCAT1	0.00342605	Oligo
CerPed	Olig_PLXDC2	0.011233	Oligo
CerPed	Olig_PLXDC2_KCNAB1	0.00169605	Oligo
CerPed	Olig_PLXDC2_KCNK10	0.0166382	Oligo
CerPed	Olig_PLXDC2_SFRP1	0.0692015	Oligo
CerPed	SOX6_AGTR1	0.00052023	Neuron (DA)
CerPed	SOX6_DDT	0.00581531	Neuron (DA)
CerPed	SOX6_GFRA2	0.000281634	Neuron (DA)
CerPed	SOX6_PART1	0.000145491	Neuron (DA)
Fibers	Astro_CYP4F12	0.000990218	Astro
Fibers	Astro_GBP2_SPOCD1	0.00512596	Astro
Fibers	Astro_GJB6_OXTR	0.000583779	Astro
Fibers	Astro_GLYATL2	0.0119316	Astro
Fibers	Astro_GUCY1A2	0.00134783	Astro
Fibers	Astro_SERPINA3	0.00161939	Astro
Fibers	Astro_SIDT1	0.00177317	Astro
Fibers	Astro_VIM_LHX2	0.0125975	Astro
Fibers	Astro_VIM_TNFSRF12A	0.0665742	Astro
Fibers	CALB1_CALCR	0.000671255	Neuron (DA)
Fibers	CALB1_CRYM_CCDC68	0.000192789	Neuron (DA)
Fibers	CALB1_GEM	0.00104224	Neuron (DA)
Fibers	CALB1_PPP1R17	0.00115435	Neuron (DA)
Fibers	CALB1_RBP4	0.00543249	Neuron (DA)
Fibers	CALB1_TRHR	0.00133164	Neuron (DA)
Fibers	Endo_COL6A3	0.00876925	Vascular
Fibers	Endo_DCN_ABCC9	0.0341763	Vascular
Fibers	Endo_IL27RA	0.0511031	Vascular
Fibers	Endo_MET	0.00685166	Vascular
Fibers	Endo_NOTCH3_PLK2	0.0697869	Vascular
Fibers	Endo_SLIT3	0.0483103	Vascular
Fibers	Endo_SNTG2	0.0151846	Vascular
Fibers	Ependyma_ZBBX	0.00454019	Ependyma_ZBBX
Fibers	Ex_CYP2J2	0.00345193	Neuron (non-DA)
Fibers	Ex_EBF2_CTC-552D5.1	0.00135339	Neuron (non-DA)
Fibers	Ex_LAMP5_BAIAP3	0.00709621	Neuron (non-DA)
Fibers	Ex_LAMP5_NTNG2	0.0174006	Neuron (non-DA)
Fibers	Ex_MYO5B	0.00525555	Neuron (non-DA)
Fibers	Ex_OPRD1	0.00124129	Neuron (non-DA)
Fibers	Ex_POSTN	0.00151377	Neuron (non-DA)
Fibers	Ex_PPP1R1C	0.00194414	Neuron (non-DA)
Fibers	Ex_SATB2	0.00079181	Neuron (non-DA)
Fibers	Ex_VWA5B1_CALB1	0.00113558	Neuron (non-DA)
Fibers	Inh_IGFBP5	0.00100615	Inh_IGFBP5
Fibers	Inh_INHBA	0.000915177	Inh_INHBA
Fibers	Inh_OTX2_CASR	0.0024162	Inh_OTX2_CASR
Fibers	Inh_PAX5_CCBE1	0.000709934	Inh_PAX5_CCBE1
Fibers	Inh_PAX5_VCAN	0.000330034	Inh_PAX5_VCAN
Fibers	Inh_PRLR_RP11-384J4.2	0.000345552	Inh_PRLR_RP11-384J4.2
Fibers	Inh_SIX3	0.00107873	Inh_SIX3
Fibers	MG_CCL3	0.00362892	MG_CCL3
Fibers	MG_CECR2_FGL1	0.00238434	MG_CECR2_FGL1
Fibers	MG_FOSL2	0.00355563	MG_FOSL2
Fibers	MG_GPNMB_LPL	0.00783693	MG_GPNMB_LPL
Fibers	MG_GPNMB_SULT1C2	0.0101842	MG_GPNMB_SULT1C2
Fibers	MG_GPNMB_SUSD1	0.00123746	MG_GPNMB_SUSD1
Fibers	MG_MGAM	0.00470759	MG_MGAM
Fibers	MG_MKI67	0.00279546	MG_MKI67
Fibers	MG_OPRM1	0.00448017	MG_OPRM1
Fibers	MG_SPON1	0.000336851	MG_SPON1
Fibers	MG_TSPO_VIM	0.0439339	MG_TSPO_VIM
Fibers	Macro_CD200R1	0.00570157	Macro_CD200R1
Fibers	OPC_ADM	0.00328928	OPC_ADM
Fibers	OPC_CACNG4	0.00168999	OPC_CACNG4
Fibers	OPC_HOXD3	0.00148072	OPC_HOXD3
Fibers	OPC_KIAA0040	0.00378994	OPC_KIAA0040
Fibers	OPC_MDFI	0.00442787	OPC_MDFI
Fibers	Olig_ENPP6_ACTN2	0.00726219	Oligo
Fibers	Olig_ENPP6_EMILIN2	0.347055	Oligo
Fibers	Olig_ENPP6_LUCAT1	0.00316464	Oligo
Fibers	Olig_PLXDC2	0.0362949	Oligo
Fibers	Olig_PLXDC2_KCNAB1	0.000629936	Oligo
Fibers	Olig_PLXDC2_KCNK10	0.0173191	Oligo
Fibers	Olig_PLXDC2_SFRP1	0.0810623	Oligo
Fibers	SOX6_AGTR1	0.000446168	Neuron (DA)
Fibers	SOX6_DDT	0.00173767	Neuron (DA)
Fibers	SOX6_GFRA2	0.000277685	Neuron (DA)
Fibers	SOX6_PART1	0.000212619	Neuron (DA)
SNpc	Astro_CYP4F12	0.000906621	Astro
SNpc	Astro_GBP2_SPOCD1	0.00297371	Astro
SNpc	Astro_GJB6_OXTR	0.00341823	Astro
SNpc	Astro_GLYATL2	0.00323684	Astro
SNpc	Astro_GUCY1A2	0.00455334	Astro
SNpc	Astro_SERPINA3	0.00138962	Astro
SNpc	Astro_SIDT1	0.000483623	Astro
SNpc	Astro_VIM_LHX2	0.00383056	Astro
SNpc	Astro_VIM_TNFSRF12A	0.142686	Astro
SNpc	CALB1_CALCR	0.00395405	Neuron (DA)
SNpc	CALB1_CRYM_CCDC68	0.00131607	Neuron (DA)
SNpc	CALB1_GEM	0.000854829	Neuron (DA)
SNpc	CALB1_PPP1R17	0.00367449	Neuron (DA)
SNpc	CALB1_RBP4	0.0929975	Neuron (DA)
SNpc	CALB1_TRHR	0.00152435	Neuron (DA)
SNpc	Endo_COL6A3	0.00654469	Vascular
SNpc	Endo_DCN_ABCC9	0.0271606	Vascular
SNpc	Endo_IL27RA	0.0300164	Vascular
SNpc	Endo_MET	0.00351613	Vascular
SNpc	Endo_NOTCH3_PLK2	0.0857188	Vascular
SNpc	Endo_SLIT3	0.027444	Vascular
SNpc	Endo_SNTG2	0.0130202	Vascular
SNpc	Ependyma_ZBBX	0.00168346	Ependyma_ZBBX
SNpc	Ex_CYP2J2	0.00211653	Neuron (non-DA)
SNpc	Ex_EBF2_CTC-552D5.1	0.000461302	Neuron (non-DA)
SNpc	Ex_LAMP5_BAIAP3	0.0165491	Neuron (non-DA)
SNpc	Ex_LAMP5_NTNG2	0.0724642	Neuron (non-DA)
SNpc	Ex_MYO5B	0.00186039	Neuron (non-DA)
SNpc	Ex_OPRD1	0.0013388	Neuron (non-DA)
SNpc	Ex_POSTN	0.000399745	Neuron (non-DA)
SNpc	Ex_PPP1R1C	0.00217182	Neuron (non-DA)
SNpc	Ex_SATB2	0.000702303	Neuron (non-DA)
SNpc	Ex_VWA5B1_CALB1	0.000346359	Neuron (non-DA)
SNpc	Inh_IGFBP5	0.000492046	Inh_IGFBP5
SNpc	Inh_INHBA	0.00171262	Inh_INHBA
SNpc	Inh_OTX2_CASR	0.00103315	Inh_OTX2_CASR
SNpc	Inh_PAX5_CCBE1	0.000832992	Inh_PAX5_CCBE1
SNpc	Inh_PAX5_VCAN	0.000253384	Inh_PAX5_VCAN
SNpc	Inh_PRLR_RP11-384J4.2	6.32271e-05	Inh_PRLR_RP11-384J4.2
SNpc	Inh_SIX3	0.000994279	Inh_SIX3
SNpc	MG_CCL3	0.00316514	MG_CCL3
SNpc	MG_CECR2_FGL1	0.00157005	MG_CECR2_FGL1
SNpc	MG_FOSL2	0.00211066	MG_FOSL2
SNpc	MG_GPNMB_LPL	0.0045964	MG_GPNMB_LPL
SNpc	MG_GPNMB_SULT1C2	0.0060194	MG_GPNMB_SULT1C2
SNpc	MG_GPNMB_SUSD1	0.00191796	MG_GPNMB_SUSD1
SNpc	MG_MGAM	0.00543869	MG_MGAM
SNpc	MG_MKI67	0.00209713	MG_MKI67
SNpc	MG_OPRM1	0.00251293	MG_OPRM1
SNpc	MG_SPON1	0.000431126	MG_SPON1
SNpc	MG_TSPO_VIM	0.0483853	MG_TSPO_VIM
SNpc	Macro_CD200R1	0.00595678	Macro_CD200R1
SNpc	OPC_ADM	0.00132359	OPC_ADM
SNpc	OPC_CACNG4	0.00107721	OPC_CACNG4
SNpc	OPC_HOXD3	0.000792047	OPC_HOXD3
SNpc	OPC_KIAA0040	0.00155395	OPC_KIAA0040
SNpc	OPC_MDFI	0.00202736	OPC_MDFI
SNpc	Olig_ENPP6_ACTN2	0.00246897	Oligo
SNpc	Olig_ENPP6_EMILIN2	0.0431431	Oligo
SNpc	Olig_ENPP6_LUCAT1	0.00351685	Oligo
SNpc	Olig_PLXDC2	0.00746396	Oligo
SNpc	Olig_PLXDC2_KCNAB1	0.0014145	Oligo
SNpc	Olig_PLXDC2_KCNK10	0.0096169	Oligo
SNpc	Olig_PLXDC2_SFRP1	0.0208674	Oligo
SNpc	SOX6_AGTR1	0.00519844	Neuron (DA)
SNpc	SOX6_DDT	0.242858	Neuron (DA)
SNpc	SOX6_GFRA2	0.00110334	Neuron (DA)
SNpc	SOX6_PART1	0.00467573	Neuron (DA)
SNpr	Astro_CYP4F12	0.00106594	Astro
SNpr	Astro_GBP2_SPOCD1	0.00347978	Astro
SNpr	Astro_GJB6_OXTR	0.00225688	Astro
SNpr	Astro_GLYATL2	0.0124444	Astro
SNpr	Astro_GUCY1A2	0.00297665	Astro
SNpr	Astro_SERPINA3	0.0023143	Astro
SNpr	Astro_SIDT1	0.000938257	Astro
SNpr	Astro_VIM_LHX2	0.00896966	Astro
SNpr	Astro_VIM_TNFSRF12A	0.199389	Astro
SNpr	CALB1_CALCR	0.00159259	Neuron (DA)
SNpr	CALB1_CRYM_CCDC68	0.00047373	Neuron (DA)
SNpr	CALB1_GEM	0.00321696	Neuron (DA)
SNpr	CALB1_PPP1R17	0.00306067	Neuron (DA)
SNpr	CALB1_RBP4	0.0796268	Neuron (DA)
SNpr	CALB1_TRHR	0.00335897	Neuron (DA)
SNpr	Endo_COL6A3	0.00758775	Vascular
SNpr	Endo_DCN_ABCC9	0.0349338	Vascular
SNpr	Endo_IL27RA	0.039432	Vascular
SNpr	Endo_MET	0.00514772	Vascular
SNpr	Endo_NOTCH3_PLK2	0.0953138	Vascular
SNpr	Endo_SLIT3	0.0433899	Vascular
SNpr	Endo_SNTG2	0.0131408	Vascular
SNpr	Ependyma_ZBBX	0.00320024	Ependyma_ZBBX
SNpr	Ex_CYP2J2	0.00398455	Neuron (non-DA)
SNpr	Ex_EBF2_CTC-552D5.1	0.00223096	Neuron (non-DA)
SNpr	Ex_LAMP5_BAIAP3	0.0618637	Neuron (non-DA)
SNpr	Ex_LAMP5_NTNG2	0.0411145	Neuron (non-DA)
SNpr	Ex_MYO5B	0.0043829	Neuron (non-DA)
SNpr	Ex_OPRD1	0.00143513	Neuron (non-DA)
SNpr	Ex_POSTN	0.00104447	Neuron (non-DA)
SNpr	Ex_PPP1R1C	0.00343259	Neuron (non-DA)
SNpr	Ex_SATB2	0.0010595	Neuron (non-DA)
SNpr	Ex_VWA5B1_CALB1	0.0018904	Neuron (non-DA)
SNpr	Inh_IGFBP5	0.00118993	Inh_IGFBP5
SNpr	Inh_INHBA	0.00248982	Inh_INHBA
SNpr	Inh_OTX2_CASR	0.00269476	Inh_OTX2_CASR
SNpr	Inh_PAX5_CCBE1	0.00230635	Inh_PAX5_CCBE1
SNpr	Inh_PAX5_VCAN	0.0012754	Inh_PAX5_VCAN
SNpr	Inh_PRLR_RP11-384J4.2	0.000403744	Inh_PRLR_RP11-384J4.2
SNpr	Inh_SIX3	0.00178775	Inh_SIX3
SNpr	MG_CCL3	0.00333896	MG_CCL3
SNpr	MG_CECR2_FGL1	0.00201566	MG_CECR2_FGL1
SNpr	MG_FOSL2	0.00236717	MG_FOSL2
SNpr	MG_GPNMB_LPL	0.00498777	MG_GPNMB_LPL
SNpr	MG_GPNMB_SULT1C2	0.00685512	MG_GPNMB_SULT1C2
SNpr	MG_GPNMB_SUSD1	0.00143108	MG_GPNMB_SUSD1
SNpr	MG_MGAM	0.00612681	MG_MGAM
SNpr	MG_MKI67	0.00254357	MG_MKI67
SNpr	MG_OPRM1	0.0040482	MG_OPRM1
SNpr	MG_SPON1	0.00030645	MG_SPON1
SNpr	MG_TSPO_VIM	0.0572974	MG_TSPO_VIM
SNpr	Macro_CD200R1	0.00678353	Macro_CD200R1
SNpr	OPC_ADM	0.00210522	OPC_ADM
SNpr	OPC_CACNG4	0.00169846	OPC_CACNG4
SNpr	OPC_HOXD3	0.0011248	OPC_HOXD3
SNpr	OPC_KIAA0040	0.00290615	OPC_KIAA0040
SNpr	OPC_MDFI	0.00342511	OPC_MDFI
SNpr	Olig_ENPP6_ACTN2	0.00366682	Oligo
SNpr	Olig_ENPP6_EMILIN2	0.093284	Oligo
SNpr	Olig_ENPP6_LUCAT1	0.00422307	Oligo
SNpr	Olig_PLXDC2	0.0158626	Oligo
SNpr	Olig_PLXDC2_KCNAB1	0.00126375	Oligo
SNpr	Olig_PLXDC2_KCNK10	0.0181975	Oligo
SNpr	Olig_PLXDC2_SFRP1	0.0374641	Oligo
SNpr	SOX6_AGTR1	0.000487528	Neuron (DA)
SNpr	SOX6_DDT	0.0129489	Neuron (DA)
SNpr	SOX6_GFRA2	0.000791918	Neuron (DA)
SNpr	SOX6_PART1	0.000551527	Neuron (DA)
SNtrans	Astro_CYP4F12	0.00115134	Astro
SNtrans	Astro_GBP2_SPOCD1	0.00544552	Astro
SNtrans	Astro_GJB6_OXTR	0.00187653	Astro
SNtrans	Astro_GLYATL2	0.012059	Astro
SNtrans	Astro_GUCY1A2	0.00319588	Astro
SNtrans	Astro_SERPINA3	0.00343671	Astro
SNtrans	Astro_SIDT1	0.00262345	Astro
SNtrans	Astro_VIM_LHX2	0.0146611	Astro
SNtrans	Astro_VIM_TNFSRF12A	0.100248	Astro
SNtrans	CALB1_CALCR	0.00131309	Neuron (DA)
SNtrans	CALB1_CRYM_CCDC68	0.0004203	Neuron (DA)
SNtrans	CALB1_GEM	0.00211603	Neuron (DA)
SNtrans	CALB1_PPP1R17	0.00312527	Neuron (DA)
SNtrans	CALB1_RBP4	0.0191988	Neuron (DA)
SNtrans	CALB1_TRHR	0.00319971	Neuron (DA)
SNtrans	Endo_COL6A3	0.0139761	Vascular
SNtrans	Endo_DCN_ABCC9	0.0437782	Vascular
SNtrans	Endo_IL27RA	0.0792609	Vascular
SNtrans	Endo_MET	0.0100112	Vascular
SNtrans	Endo_NOTCH3_PLK2	0.0828568	Vascular
SNtrans	Endo_SLIT3	0.0696547	Vascular
SNtrans	Endo_SNTG2	0.0238699	Vascular
SNtrans	Ependyma_ZBBX	0.00619199	Ependyma_ZBBX
SNtrans	Ex_CYP2J2	0.00625564	Neuron (non-DA)
SNtrans	Ex_EBF2_CTC-552D5.1	0.00295357	Neuron (non-DA)
SNtrans	Ex_LAMP5_BAIAP3	0.0151818	Neuron (non-DA)
SNtrans	Ex_LAMP5_NTNG2	0.0371809	Neuron (non-DA)
SNtrans	Ex_MYO5B	0.0100974	Neuron (non-DA)
SNtrans	Ex_OPRD1	0.00216614	Neuron (non-DA)
SNtrans	Ex_POSTN	0.00197462	Neuron (non-DA)
SNtrans	Ex_PPP1R1C	0.0042982	Neuron (non-DA)
SNtrans	Ex_SATB2	0.00249593	Neuron (non-DA)
SNtrans	Ex_VWA5B1_CALB1	0.00241306	Neuron (non-DA)
SNtrans	Inh_IGFBP5	0.00227732	Inh_IGFBP5
SNtrans	Inh_INHBA	0.00175606	Inh_INHBA
SNtrans	Inh_OTX2_CASR	0.00412654	Inh_OTX2_CASR
SNtrans	Inh_PAX5_CCBE1	0.00210313	Inh_PAX5_CCBE1
SNtrans	Inh_PAX5_VCAN	0.000760024	Inh_PAX5_VCAN
SNtrans	Inh_PRLR_RP11-384J4.2	0.000800221	Inh_PRLR_RP11-384J4.2
SNtrans	Inh_SIX3	0.00221115	Inh_SIX3
SNtrans	MG_CCL3	0.00432124	MG_CCL3
SNtrans	MG_CECR2_FGL1	0.00345484	MG_CECR2_FGL1
SNtrans	MG_FOSL2	0.00352921	MG_FOSL2
SNtrans	MG_GPNMB_LPL	0.00748628	MG_GPNMB_LPL
SNtrans	MG_GPNMB_SULT1C2	0.0142424	MG_GPNMB_SULT1C2
SNtrans	MG_GPNMB_SUSD1	0.00125582	MG_GPNMB_SUSD1
SNtrans	MG_MGAM	0.00668026	MG_MGAM
SNtrans	MG_MKI67	0.00393774	MG_MKI67
SNtrans	MG_OPRM1	0.00491691	MG_OPRM1
SNtrans	MG_SPON1	0.000368648	MG_SPON1
SNtrans	MG_TSPO_VIM	0.0491065	MG_TSPO_VIM
SNtrans	Macro_CD200R1	0.00961868	Macro_CD200R1
SNtrans	OPC_ADM	0.00250898	OPC_ADM
SNtrans	OPC_CACNG4	0.00195739	OPC_CACNG4
SNtrans	OPC_HOXD3	0.0014467	OPC_HOXD3
SNtrans	OPC_KIAA0040	0.00379658	OPC_KIAA0040
SNtrans	OPC_MDFI	0.00512357	OPC_MDFI
SNtrans	Olig_ENPP6_ACTN2	0.00456069	Oligo
SNtrans	Olig_ENPP6_EMILIN2	0.159713	Oligo
SNtrans	Olig_ENPP6_LUCAT1	0.00860846	Oligo
SNtrans	Olig_PLXDC2	0.0325968	Oligo
SNtrans	Olig_PLXDC2_KCNAB1	0.00136779	Oligo
SNtrans	Olig_PLXDC2_KCNK10	0.0201943	Oligo
SNtrans	Olig_PLXDC2_SFRP1	0.0377001	Oligo
SNtrans	SOX6_AGTR1	0.00087853	Neuron (DA)
SNtrans	SOX6_DDT	0.00665269	Neuron (DA)
SNtrans	SOX6_GFRA2	0.000660115	Neuron (DA)
SNtrans	SOX6_PART1	0.000594391	Neuron (DA)
